# Supplementary material for: Three-component formal metathesis via remote activating strategy enabled (RASE) domino activation of two C(sp3)–O bonds in alkyl ethers
Source: Royal Society of Chemistry journal article supplement (doi:10.1039/d4qo00740a), 2024-01-01

**Supplementary Information for:**

**Three-component Formal Metathesis via Remote Activating  
Strategy Enabled (RASE) Domino Activation of Two (sp<sup>3</sup>)-O  
Bonds in Alkyl Ethers**

*Dailin Zhuang,<sup>†</sup> Le Cheng,<sup>†</sup> Yichuan Yan,<sup>†</sup> Yuting Tang,<sup>†</sup> Zhenyang Wan,<sup>†</sup> Jiahao  
Gu,<sup>†</sup> Yuhong Lu,<sup>†</sup> Xinyao Li<sup>\*,‡</sup> and Ziyuan Li<sup>\*,†</sup>*

<sup>†</sup> Department of Pharmaceutical and Biological Engineering, School of Chemical Engineering, Sichuan  
University, No.24 South Section 1, Yihuan Road, Chengdu 610065, China  
E-mail: liziyuan@scu.edu.cn; Fax: (+86)28-85405221

<sup>‡</sup> Department of Chemistry, College of Sciences, Shanghai Engineering Research Center of Organ  
Repair, Shanghai University, Shanghai 200444, China  
E-mail: xinyaoli@shu.edu.cn

**Table of Contents**

|                                                      |     |
|------------------------------------------------------|-----|
| 1. General Remarks .....                             | S2  |
| 2. General Procedure and Characterization Data.....  | S3  |
| 3. Control Experiments for Mechanistic Studies ..... | S24 |
| 4. Crystal Structure of <b>6a</b> .....              | S33 |
| 5. Density Functional Theory (DFT) Calculations..... | S40 |
| 6. References .....                                  | S59 |
| 7. NMR Spectra .....                                 | S60 |

## 1. General Remarks

All commercially available compounds were purchased from Sigma-Aldrich, Alfa-Aesar, Acros, J&K Chemicals, Adamas-beta, Accela ChemBio and Aladdin Chemicals. Unless otherwise noted, materials obtained from commercial suppliers were used without further purification. Benzyl alkyl ethers **1** and their alkyl benzene precursors **7** were prepared according to the methods reported in our recently published remote activating strategy enabled benzylic C(sp<sup>3</sup>)-H alkoxylation.<sup>1</sup> Products were purified by flash chromatography on silica gel using petroleum ether, ethyl acetate and dichloromethane as the eluents. <sup>1</sup>H-NMR spectra were recorded on JNM-ECZ400S/L1 spectrometers. Chemical shifts (in ppm) were referenced with TMS in CDCl<sub>3</sub> (0 ppm). <sup>13</sup>C-NMR spectra were obtained by using the same NMR spectrometers and were calibrated with CDCl<sub>3</sub> (δ = 77.00 ppm) or DMSO-*d*<sub>6</sub> (δ = 39.50 ppm). Single-crystal X-ray diffraction intensity data of **6a** were collected on a Bruker D8 Venture diffractometer. High resolution mass spectra were obtained from an Agilent 6520B Q-TOF mass spectrometer with electron spray ionization (ESI) as the ion source.

## 2. General Procedure and Characterization Data

### 2.1 General Procedure and Characterization Data for the Preparation of 2-Alkoxythiazoles 2

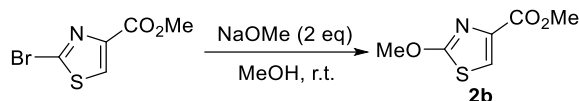

To a solution of methyl 2-bromothiazol-4-carboxylate (2.21 g, 10 mmol, 1 eq) in methanol (20 mL) was added sodium methoxide (0.54 g, 20 mmol, 2 equiv) in five batches, and the reaction mixture was stirred for 12 hours at room temperature. After quenched with  $\text{NH}_4\text{Cl}$  (aq.), the mixture was extracted with ethyl acetate. The combined organic phase was washed with water and brine, dried over anhydrous sodium sulfate, and concentrated *in vacuo* to give dark residue, which was then purified by flash chromatography using petroleum ether and ethyl acetate as the eluent (3:1, *v/v*) on silica gel to afford 1.14 g of methyl 2-methoxythiazol-4-carboxylate **2b** (66%).

#### Methyl 2-methoxythiazole-4-carboxylate (2b):

COC(=O)c1cc(OC)nn1 Light yellow oil.  $^1\text{H NMR}$  ( $\text{CDCl}_3$ , 400 MHz):  $\delta$  = 7.61 (s, 1H), 4.16 (s, 3H), 3.90 (s, 3H) ppm.  $^{13}\text{C NMR}$  ( $\text{CDCl}_3$ , 100 MHz):  $\delta$  = 174.5, 161.6, 140.7, 120.7, 59.0, 52.3 ppm. **HRMS (ESI)**  $m/z$  calcd for  $\text{C}_6\text{H}_8\text{NO}_3\text{S}$  [ $\text{M}+\text{H}$ ] $^+$ : 174.0219, found 174.0222.

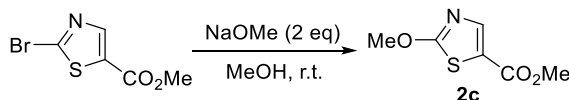

To a solution of methyl 2-bromothiazol-5-carboxylate (2.21 g, 10 mmol, 1 eq) in methanol (20 mL) was added sodium methoxide (0.54 g, 20 mmol, 2 equiv) in five batches, and the reaction mixture was stirred for 12 hours at room temperature. After quenched with  $\text{NH}_4\text{Cl}$  (aq.), the mixture was extracted with ethyl acetate. The combined organic phase was washed with water and brine, dried over anhydrous sodium sulfate, and concentrated *in vacuo* to give dark residue, which was then purified by flash chromatography using petroleum ether and ethyl acetate as the eluent (3:1, *v/v*) on silica gel to afford 1.04 g of methyl 2-methoxythiazol-5-carboxylate **2c** (60%).

#### Methyl 2-methoxythiazole-5-carboxylate (2c):

COC(=O)c1cc(OC)nn1 Colorless oil.  $^1\text{H NMR}$  ( $\text{CDCl}_3$ , 400 MHz):  $\delta$  = 7.83 (s, 1H), 4.13 (s, 3H), 3.86 (s, 3H) ppm.  $^{13}\text{C NMR}$  ( $\text{CDCl}_3$ , 100 MHz):  $\delta$  = 178.7, 161.8, 144.3, 121.0, 58.7, 52.0 ppm. **HRMS (ESI)**  $m/z$  calcd for  $\text{C}_6\text{H}_8\text{NO}_3\text{S}$  [ $\text{M}+\text{H}$ ] $^+$ : 174.0219, found 174.0222.

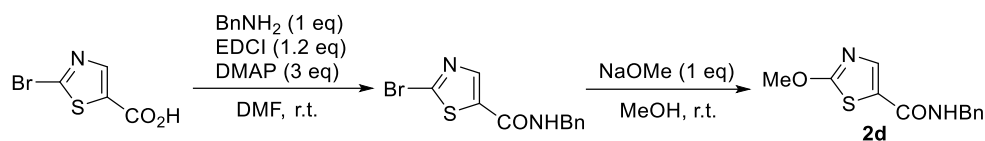

To a solution of 2-bromothiazol-5-carboxylic acid (1.03 g, 5 mmol, 1 eq) and DMAP (1.83 g, 15 mmol, 3 eq) in DMF (15 mL) was added EDCI (1.15 g, 6 mmol, 1.2 equiv). After stirring for 15 minutes, benzylamine (0.54 g, 5 mmol, 1 eq) was added, and the reaction mixture was stirred for 12 hours at room temperature. After quenched with  $\text{NH}_4\text{Cl}$  (aq.), the mixture was extracted with ethyl acetate. The combined organic phase was washed with water and brine, dried over anhydrous sodium sulfate, and concentrated *in vacuo*. The generated residue was employed directly in the next step.

To a solution of the above residue in methanol (10 mL) was added sodium methoxide (0.27 g, 5 mmol, 1 equiv) in three batches, and the reaction mixture was stirred for 4 hours at room temperature. After quenched with  $\text{NH}_4\text{Cl}$  (aq.), the mixture was extracted with ethyl acetate. The combined organic phase was washed with water and brine, dried over anhydrous sodium sulfate, and concentrated *in vacuo* to give dark residue, which was then purified by flash chromatography using petroleum ether and ethyl acetate as the eluent (15:1, *v/v*) on silica gel to afford 0.58 g of *N*-benzyl-2-methoxythiazole-5-carboxamide **2d** (47% for two steps).

***N*-Benzyl-2-methoxythiazole-5-carboxamide (2d):**

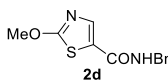 Light yellow oil.  $^1\text{H}$  NMR ( $\text{CDCl}_3$ , 400 MHz):  $\delta$  = 7.59 (s, 1H), 7.29-7.20 (m, 5H), 7.15 (t,  $J$  = 5.9 Hz, 1H), 4.45 (d,  $J$  = 5.8 Hz, 2H), 4.03 (s, 3H) ppm.  $^{13}\text{C}$  NMR ( $\text{CDCl}_3$ , 100 MHz):  $\delta$  = 177.2, 160.9, 138.5, 137.8, 128.5, 127.6, 127.3, 126.7, 58.5, 43.6 ppm. HRMS (ESI)  $m/z$  calcd for  $\text{C}_{12}\text{H}_{13}\text{N}_2\text{O}_2\text{S}$  [ $\text{M}+\text{H}$ ] $^+$ : 249.0692, found 249.0690.

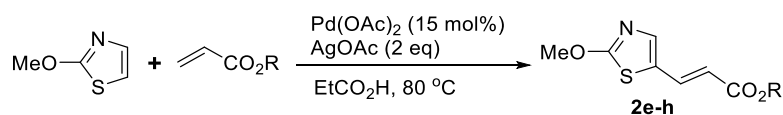

To a reaction tube charged with a solution of 2-methoxythiazole (**2a**, 1.15 g, 10 mmol, 1 eq), palladium diacetate (340 mg, 1.5 mmol, 15 mol%) and silver acetate (3.34 g, 20 mmol, 2 eq) in propionic acid (30 mL) was added acrylate (20 mmol, 2 equiv) at room temperature, and the reaction mixture was stirred at 80 °C (oil temperature) for 12 hours. After filtered over celite, the



mixture was extracted with ethyl acetate. The combined organic phase was washed with Na<sub>2</sub>CO<sub>3</sub> (aq.), water and brine, dried over anhydrous sodium sulfate, and concentrated *in vacuo* to give dark residue, which was then purified by flash chromatography using petroleum ether and ethyl acetate as the eluent (6:1, v/v) on silica gel to afford 2-methoxythiazole-5-arylates **2e-h**.

**Methyl (*E*)-3-(2-methoxythiazol-5-yl)acrylate (**2e**):**

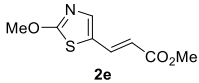 Yield 62%. Light yellow oil. <sup>1</sup>H NMR (CDCl<sub>3</sub>, 400 MHz): δ = 7.65 (d, *J* = 15.6 Hz, 1H), 7.29 (s, 1H), 5.93 (d, *J* = 15.6 Hz, 1H), 4.11 (s, 3H), 3.77 (s, 3H) ppm. <sup>13</sup>C NMR (CDCl<sub>3</sub>, 100 MHz): δ = 176.0, 166.8, 141.6, 135.1, 127.8, 116.7, 58.6, 51.6 ppm. HRMS (ESI) *m/z* calcd for C<sub>8</sub>H<sub>10</sub>NO<sub>3</sub>S [M+H]<sup>+</sup>: 200.0376, found 200.0374.

**Ethyl (*E*)-3-(2-methoxythiazol-5-yl)acrylate (**2f**):**

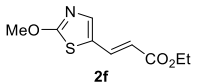 Yield 60%. Light yellow oil. <sup>1</sup>H NMR (CDCl<sub>3</sub>, 400 MHz): δ = 7.65 (d, *J* = 15.5 Hz, 1H), 7.29 (s, 1H), 5.93 (d, *J* = 15.6 Hz, 1H), 4.23 (q, *J* = 7.1 Hz, 2H), 4.11 (s, 3H), 1.31 (t, *J* = 7.1 Hz, 3H) ppm. <sup>13</sup>C NMR (CDCl<sub>3</sub>, 100 MHz): δ = 175.9, 166.3, 141.4, 134.8, 127.8, 117.1, 60.3, 58.5, 14.1 ppm. HRMS (ESI) *m/z* calcd for C<sub>9</sub>H<sub>12</sub>NO<sub>3</sub>S [M+H]<sup>+</sup>: 214.0533, found 214.0535.

**Isobutyl (*E*)-3-(2-methoxythiazol-5-yl)acrylate (**2g**):**

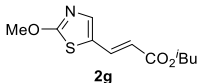 Yield 65%. Light yellow oil. <sup>1</sup>H NMR (CDCl<sub>3</sub>, 400 MHz): δ = 7.64 (d, *J* = 15.6 Hz, 1H), 7.30 (s, 1H), 5.95 (d, *J* = 15.6 Hz, 1H), 4.11 (s, 3H), 3.96 (d, *J* = 6.7 Hz, 2H), 1.99 (sept, *J* = 6.7 Hz, 1H), 0.97 (d, *J* = 6.8 Hz, 6H) ppm. <sup>13</sup>C NMR (CDCl<sub>3</sub>, 100 MHz): δ = 176.0, 166.5, 141.4, 134.8, 127.9, 117.2, 70.6, 58.6, 27.7, 19.0 ppm. HRMS (ESI) *m/z* calcd for C<sub>11</sub>H<sub>16</sub>NO<sub>3</sub>S [M+H]<sup>+</sup>: 242.0845, found 242.0843.

***Tert*-butyl (*E*)-3-(2-methoxythiazol-5-yl)acrylate (**2h**):**

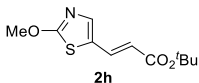 Yield 54%. Light yellow oil. <sup>1</sup>H NMR (CDCl<sub>3</sub>, 400 MHz): δ = 7.53 (d, *J* = 15.5 Hz, 1H), 7.26 (s, 1H), 5.87 (d, *J* = 15.6 Hz, 1H), 4.10 (s, 3H), 1.51 (s, 9H) ppm. <sup>13</sup>C NMR (CDCl<sub>3</sub>, 100 MHz): δ = 175.8, 165.7, 140.9, 133.8, 128.1, 119.4, 80.6, 58.5, 28.1 ppm. HRMS (ESI) *m/z* calcd for C<sub>11</sub>H<sub>16</sub>NO<sub>3</sub>S [M+H]<sup>+</sup>: 242.0845, found 242.0842.

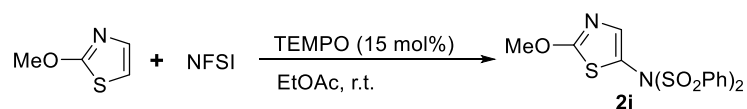

To a reaction tube charged with NFSI (2.52 g, 8 mmol, 4 eq) was added a solution of

2-methoxythiazole (**2a**, 230 mg, 2 mmol, 1 eq) and TEMPO (46.9 mg, 0.3 mmol, 0.15 eq) in ethyl acetate (5 mL) under argon (1 atm). After stirring at room temperature for 24 hours, the reaction mixture was concentrated *in vacuo* to give dark residue, which was then purified by flash chromatography using petroleum ether and ethyl acetate as the eluent (4:1, *v/v*) on silica gel to afford 551.4 mg of thiazole **2i** (67%).

***N*-(2-Methoxythiazol-5-yl)-*N*-(phenylsulfonyl)benzenesulfonamide (**2i**):**

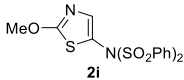 Colorless oil. <sup>1</sup>H NMR (CDCl<sub>3</sub>, 400 MHz): δ = 8.00-7.97 (m, 4H), 7.71-7.67 (m, 2H), 7.58-7.54 (m, 4H), 6.76 (s, 1H), 4.06 (s, 3H) ppm. <sup>13</sup>C NMR (CDCl<sub>3</sub>, 100 MHz): δ = 175.4, 141.1, 138.4, 134.5, 129.2, 128.6, 121.6, 57.9 ppm. HRMS (ESI) *m/z* calcd for C<sub>16</sub>H<sub>15</sub>N<sub>2</sub>O<sub>5</sub>S<sub>3</sub> [M+H]<sup>+</sup>: 411.0138, found 411.0135.

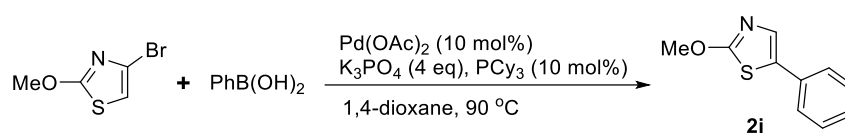

To a reaction tube charged with phenylboronic acid (1.83 g, 15 mmol, 1.5 eq), palladium diacetate (227 mg, 1 mmol, 10 mol%), tricyclohexyl phosphine (280 mg, 1 mmol, 10 mol%) and potassium phosphate (8.49 g, 40 mmol, 4 eq) was added a solution of 2-methoxythiazole (**2a**, 1.15 g, 10 mmol, 1 eq) in 1,4-dioxane (30 mL) under argon (1 atm), and the reaction mixture was stirred at 90 °C (oil temperature) for 16 hours. After filtered over celite, the mixture was extracted with ethyl acetate. The combined organic phase was washed with water and brine, dried over anhydrous sodium sulfate, and concentrated *in vacuo* to give dark residue, which was then purified by flash chromatography using petroleum ether and ethyl acetate as the eluent (20:1, *v/v*) on silica gel to afford 1.38 g of thiazole **2j** (72%).

**2-Methoxy-5-phenylthiazole (**2j**):**

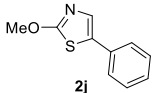 Light brown oil. <sup>1</sup>H NMR (CDCl<sub>3</sub>, 400 MHz): δ = 7.44-7.42 (m, 2H), 7.37-7.32 (m, 3H), 7.29-7.25 (m, 1H), 4.09 (s, 3H) ppm. <sup>13</sup>C NMR (CDCl<sub>3</sub>, 100 MHz): δ = 174.1, 131.8, 131.8, 131.2, 128.9, 127.5, 125.8, 58.1 ppm. HRMS (ESI) *m/z* calcd for C<sub>10</sub>H<sub>10</sub>NOS [M+H]<sup>+</sup>: 192.0478, found 192.0477.

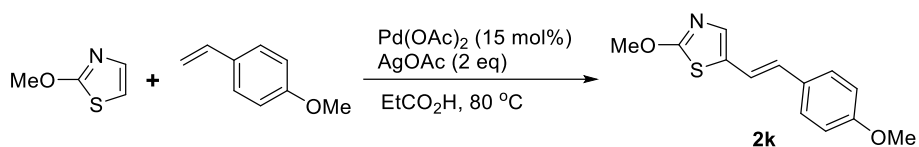

To a reaction tube charged with a solution of 2-methoxythiazole (**2a**, 1.15 g, 10 mmol, 1 eq), palladium diacetate (340 mg, 1.5 mmol, 15 mol%) and silver acetate (3.34 g, 20 mmol, 2 eq) in propionic acid (20 mL) was added 4-methoxystyrene (2.01 g, 15 mmol, 1.5 equiv) at room temperature, and the reaction mixture was stirred at 80 °C (oil temperature) for 12 hours. After filtered over celite, the mixture was extracted with ethyl acetate. The combined organic phase was washed with Na<sub>2</sub>CO<sub>3</sub> (aq.), water and brine, dried over anhydrous sodium sulfate, and concentrated *in vacuo* to give dark residue, which was then purified by flash chromatography using petroleum ether and ethyl acetate as the eluent (20:1, *v/v*) on silica gel to afford 1.41 g of thiazole **2k** (57%).

**(E)-2-Methoxy-5-(4-methoxystyryl)thiazole (2k):**

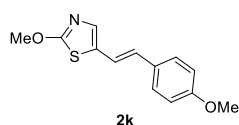

Light yellow oil. <sup>1</sup>H NMR (CDCl<sub>3</sub>, 400 MHz): δ = 7.33 (d, *J* = 8.8 Hz, 2H), 7.03 (s, 1H), 6.90 (d, *J* = 16.0 Hz, 1H), 6.86 (d, *J* = 8.8 Hz, 2H), 6.55 (d, *J* = 16.0 Hz, 1H), 4.06 (s, 3H), 3.80 (s, 3H) ppm. <sup>13</sup>C NMR (CDCl<sub>3</sub>,

**100 MHz):** δ = 173.1, 159.3, 134.9, 131.1, 129.4, 128.4, 127.3, 117.1, 114.1, 58.1, 55.2 ppm.

**HRMS (ESI) *m/z*** calcd for C<sub>13</sub>H<sub>14</sub>NO<sub>2</sub>S [M+H]<sup>+</sup>: 248.0740, found 248.0737.

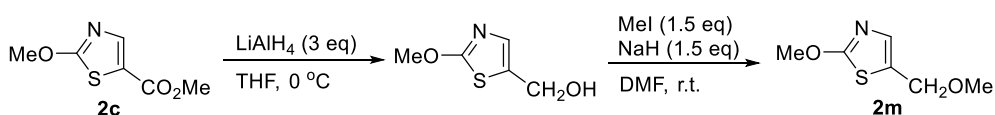

To a solution of thiazole **2c** (520 mg, 3 mmol, 1 eq) in THF (8 mL) was added lithium aluminum hydride (342 mg, 9 mmol, 3 equiv) in five batches at 0 °C (iced water bath temperature). After stirring for 6 hours, the reaction mixture was carefully quenched with iced water at 0 °C, and extracted with ethyl acetate. The combined organic phase was washed with water and brine, dried over anhydrous sodium sulfate, and concentrated *in vacuo*. The generated residue was employed directly in the next step.

To a solution of the above residue in DMF (10 mL) was added sodium hydride (180 mg, 4.5 mmol, 1.5 equiv) in three batches at 0 °C (iced water bath temperature). The reaction mixture was stirred for 15 minutes and iodomethane (640 mg, 4.5 mmol, 3 eq) was added. After stirring at room

temperature for 3 hours, the reaction mixture was quenched with  $\text{NH}_4\text{Cl}$  (aq.) and extracted with ethyl acetate. The combined organic phase was washed with water and brine, dried over anhydrous sodium sulfate, and concentrated *in vacuo* to give dark residue, which was then purified by flash chromatography using petroleum ether and ethyl acetate as the eluent (8:1, *v/v*) on silica gel to afford 195.9 mg of thiazole **2m** (41% for two steps).

### 2-Methoxy-5-(methoxymethyl)thiazole (**2m**):

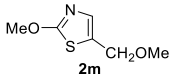 Colorless oil.  $^1\text{H}$  NMR ( $\text{CDCl}_3$ , 400 MHz):  $\delta$  = 7.02 (t,  $J$  = 0.88 Hz, 1H), 4.47 (d,  $J$  = 0.88 Hz, 2H), 4.06 (s, 3H), 3.35 (s, 3H) ppm.  $^{13}\text{C}$  NMR ( $\text{CDCl}_3$ , 100 MHz):  $\delta$  = 175.8, 135.6, 127.2, 67.0, 58.1, 57.4 ppm. HRMS (ESI)  $m/z$  calcd for  $\text{C}_6\text{H}_{10}\text{NO}_2\text{S}$   $[\text{M}+\text{H}]^+$ : 160.0427, found 160.0426.

## 2.2 General Procedure and Characterization Data for the Three-component Formal Metathesis Using Benzyl Alkyl Ether **1** (Results Shown in Table 2)

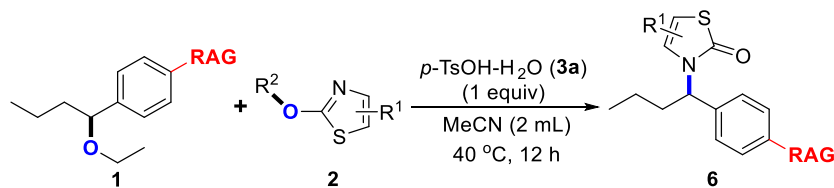

To a reaction tube charged with *p*-TsOH- $\text{H}_2\text{O}$  (**3a**, 57.1 mg, 0.3 mmol, 1 equiv) was added a solution of **1** (0.3 mmol, 1 equiv) and **2** (0.45 mmol, 1.5 equiv) in anhydrous MeCN (2 mL, 0.15 M of **1**) via a syringe under argon (1 atm), and the reaction mixture was stirred for 12 hours at 40 °C (oil bath temperature). After quenched with  $\text{Na}_2\text{CO}_3$  (aq.), the mixture was extracted with ethyl acetate. The combined organic phase was concentrated *in vacuo* to give dark residue, which was then purified by flash chromatography using petroleum ether and ethyl acetate as the eluent on silica gel to afford corresponding thiazol-2(3H)-one products **6a-p**.

### Ethyl (4-(1-(2-oxothiazol-3(2H)-yl)butyl)phenyl)carbamate (**6a**):

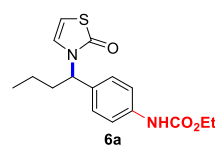

The three-component formal metathesis of 0.3 mmol of ethyl (4-(1-ethoxybutyl)phenyl)carbamate (**1a**, 79.6 mg), 0.3 mmol of *p*-TsOH- $\text{H}_2\text{O}$  (**3a**, 57.1 mg) and 0.45 mmol of 2-methoxythiazole (**2a**, 43  $\mu\text{L}$ ,

51.8 mg) afforded 84.8 mg of **6a** (88%) after flash chromatography on silica gel using petroleum ether and ethyl acetate (3:1, v/v) as the eluent.

In another three-component formal metathesis of 0.3 mmol of ethyl (4-(1-ethoxybutyl)phenyl)carbamate (**1a**, 79.6 mg), 0.3 mmol of *p*-TsOH-H<sub>2</sub>O (**3a**, 57.1 mg) and 0.45 mmol of 2-ethoxythiazole (**2a'**, 51 μL, 58.1 mg) afforded 73.5 mg of **6a** (76%) after flash chromatography on silica gel using petroleum ether and ethyl acetate (3:1, v/v) as the eluent.

White solid, m.p. 78-80 °C. <sup>1</sup>H NMR (CDCl<sub>3</sub>, 400 MHz): δ = 7.38 (d, *J* = 8.2 Hz, 2H), 7.24 (d, *J* = 8.2 Hz, 2H), 6.98 (s, 1H), 6.53 (d, *J* = 5.5 Hz, 1H), 6.07 (d, *J* = 5.5 Hz, 1H), 5.43 (dd, *J* = 6.7 Hz, 2.5 Hz, 1H), 4.21 (q, *J* = 7.1 Hz, 2H), 2.09-1.97 (m, 2H), 1.38-1.32 (m, 2H), 1.29 (t, *J* = 7.1 Hz, 3H), 0.97 (t, *J* = 7.4 Hz, 3H) ppm. <sup>13</sup>C NMR (CDCl<sub>3</sub>, 100 MHz): δ = 172.1, 153.6, 137.9, 134.1, 127.9, 121.7, 118.8, 101.4, 61.2, 56.6, 35.4, 19.4, 14.5, 13.6 ppm. HRMS (ESI) *m/z* calcd for C<sub>16</sub>H<sub>21</sub>N<sub>2</sub>O<sub>3</sub>S [M+H]<sup>+</sup>: 321.1267, found 321.1262.

**Methyl 3-(1-(4-((ethoxycarbonyl)amino)phenyl)butyl)-2-oxo-2,3-dihydrothiazole-4-carboxylate (6b):**

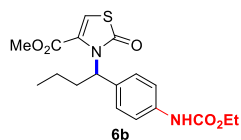

The three-component formal metathesis of 0.3 mmol of ethyl (4-(1-ethoxybutyl)phenyl)carbamate (**1a**, 79.6 mg), 0.3 mmol of *p*-TsOH-H<sub>2</sub>O (**3a**, 57.1 mg) and 0.45 mmol of methyl 2-methoxythiazole-4-carboxylate (**2b**, 77.9 mg) did not afford any **6b**.

**Methyl 3-(1-(4-((ethoxycarbonyl)amino)phenyl)butyl)-2-oxo-2,3-dihydrothiazole-5-carboxylate (6c):**

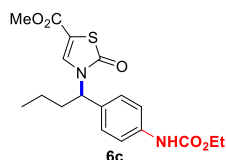

The three-component formal metathesis of 0.3 mmol of ethyl (4-(1-ethoxybutyl)phenyl)carbamate (**1a**, 79.6 mg), 0.3 mmol of *p*-TsOH-H<sub>2</sub>O (**3a**, 57.1 mg) and 0.45 mmol of methyl 2-methoxythiazole-5-carboxylate (**2c**, 77.9 mg) afforded 108.7 mg of **6c** (96%) after flash chromatography on silica gel using petroleum ether and ethyl acetate (3:1, v/v) as the eluent.

Colorless oil. <sup>1</sup>H NMR (CDCl<sub>3</sub>, 400 MHz): δ = 7.43-7.40 (m, 3H), 7.25 (d, *J* = 8.2 Hz, 2H), 7.06 (s, 1H), 5.44 (t, *J* = 7.9 Hz, 1H), 4.21 (q, *J* = 7.1 Hz, 2H), 3.80 (s, 3H), 2.12-2.01 (m, 2H), 1.37-1.33 (m, 2H), 1.29 (t, *J* = 7.1 Hz, 3H), 0.97 (t, *J* = 7.4 Hz, 3H) ppm. <sup>13</sup>C NMR (CDCl<sub>3</sub>, 100

**MHz):**  $\delta$  = 171.3, 161.2, 153.5, 138.4, 133.1, 130.3, 127.9, 119.0, 108.5, 61.2, 57.4, 52.2, 35.4, 19.4, 14.4, 13.5 ppm. **HRMS (ESI)**  $m/z$  calcd for C<sub>18</sub>H<sub>23</sub>N<sub>2</sub>O<sub>5</sub>S [M+H]<sup>+</sup>: 379.1322, found 379.1320.

**Ethyl (4-(1-(5-(benzylcarbamoyl)-2-oxothiazol-3(2H)-yl)butyl)phenyl)carbamate (6d):**

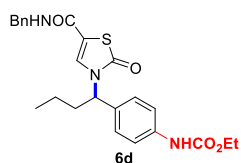

The three-component formal metathesis of 0.3 mmol of ethyl (4-(1-ethoxybutyl)phenyl)carbamate (**1a**, 79.6 mg), 0.3 mmol of *p*-TsOH-H<sub>2</sub>O (**3a**, 57.1 mg) and 0.45 mmol of *N*-benzyl-2-methoxythiazole-5-carboxamide (**2d**, 111.7 mg) afforded 118.6 mg of **6d** (87%) after flash chromatography on silica gel using petroleum ether and ethyl acetate (3:1, *v/v*) as the eluent.

Colorless oil. **<sup>1</sup>H NMR (CDCl<sub>3</sub>, 400 MHz):**  $\delta$  = 7.45 (s, 1H), 7.39 (s, 1H), 7.30 (d, *J* = 8.3 Hz, 2H), 7.25-7.18 (m, 5H), 7.12 (d, *J* = 8.4 Hz, 2H), 7.06 (t, *J* = 5.7 Hz, 1H), 5.36 (dd, *J* = 6.8 Hz, 1.8 Hz, 1H), 4.43-4.32 (m, 2H), 4.10 (q, *J* = 7.1 Hz, 2H), 2.00-1.89 (m, 2H), 1.29-1.26 (m, 2H), 1.23 (t, *J* = 7.1 Hz, 3H), 0.91 (t, *J* = 7.3 Hz, 3H) ppm. **<sup>13</sup>C NMR (CDCl<sub>3</sub>, 100 MHz):**  $\delta$  = 170.9, 160.3, 153.8, 138.2, 137.5, 133.1, 128.4, 127.7, 127.4, 126.1, 119.1, 112.8, 61.1, 57.2, 43.7, 35.3, 19.3, 14.4, 13.4 ppm. **HRMS (ESI)**  $m/z$  calcd for C<sub>24</sub>H<sub>28</sub>N<sub>3</sub>O<sub>4</sub>S [M+H]<sup>+</sup>: 454.1795, found 454.1791.

**Methyl (E)-3-(3-(1-(4-((ethoxycarbonyl)amino)phenyl)butyl)-2-oxo-2,3-dihydrothiazol-5-yl)acrylate (6e):**

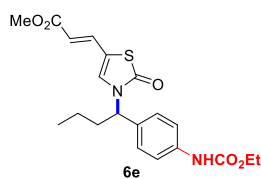

The three-component formal metathesis of 0.3 mmol of ethyl (4-(1-ethoxybutyl)phenyl)carbamate (**1a**, 79.6 mg), 0.3 mmol of *p*-TsOH-H<sub>2</sub>O (**3a**, 57.1 mg) and 0.45 mmol of methyl (*E*)-3-(2-methoxythiazol-5-yl)acrylate (**2e**, 89.6 mg) afforded 110.8 mg of **6e** (91%) after flash chromatography on silica gel using petroleum ether and ethyl acetate (3:1, *v/v*) as the eluent.

Light yellow oil. **<sup>1</sup>H NMR (CDCl<sub>3</sub>, 400 MHz):**  $\delta$  = 7.44-7.41 (m, 3H), 7.24 (d, *J* = 8.3 Hz, 2H), 7.14 (s, 1H), 6.86 (s, 1H), 5.77 (d, *J* = 15.4 Hz, 1H), 5.42 (t, *J* = 7.9 Hz, 1H), 4.21 (q, *J* = 7.2 Hz, 2H), 3.74 (s, 3H), 2.12-1.97 (m, 2H), 1.42-1.31 (m, 2H), 1.29 (t, *J* = 7.4 Hz, 3H), 0.97 (t, *J* = 7.4 Hz, 3H) ppm. **<sup>13</sup>C NMR (CDCl<sub>3</sub>, 100 MHz):**  $\delta$  = 169.9, 166.7, 153.6, 138.3, 135.0, 133.1, 127.8,

126.5, 118.9, 116.0, 115.6, 61.2, 57.2, 51.6, 35.3, 19.4, 14.4, 13.5 ppm. **HRMS (ESI)**  $m/z$  calcd for  $C_{20}H_{25}N_2O_5S$   $[M+H]^+$ : 405.1479, found 405.1473.

**Ethyl (E)-3-(3-(1-(4-((ethoxycarbonyl)amino)phenyl)butyl)-2-oxo-2,3-dihydrothiazol-5-yl)acrylate (6f):**

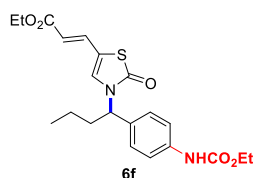

The three-component formal metathesis of 0.3 mmol of ethyl (4-(1-ethoxybutyl)phenyl)carbamate (**1a**, 79.6 mg), 0.3 mmol of *p*-TsOH-H<sub>2</sub>O (**3a**, 57.1 mg) and 0.45 mmol of ethyl (*E*)-3-(2-methoxythiazol-5-yl)acrylate (**2f**, 96.0 mg) afforded 103.4 mg of **6f** (82%) after flash chromatography on silica gel using petroleum ether and ethyl acetate (3:1, *v/v*) as the eluent.

Colorless oil. **<sup>1</sup>H NMR (CDCl<sub>3</sub>, 400 MHz):**  $\delta$  = 7.44-7.40 (m, 3H), 7.25 (d,  $J$  = 8.6 Hz, 2H), 7.13 (s, 1H), 6.84 (s, 1H), 5.77 (d,  $J$  = 15.3 Hz, 1H), 5.42 (dd,  $J$  = 6.9 Hz, 2.0 Hz, 1H), 4.34-4.17 (m, 4H), 2.12-1.97 (m, 2H), 1.40-1.27 (m, 8H), 0.97 (t,  $J$  = 7.4 Hz, 3H) ppm. **<sup>13</sup>C NMR (CDCl<sub>3</sub>, 100 MHz):**  $\delta$  = 170.0, 166.3, 153.6, 138.3, 134.8, 133.2, 127.9, 126.3, 118.9, 116.6, 115.7, 61.2, 60.4, 57.2, 35.3, 19.4, 14.4, 14.1, 13.5 ppm. **HRMS (ESI)**  $m/z$  calcd for  $C_{21}H_{27}N_2O_5S$   $[M+H]^+$ : 419.1635, found 419.1635.

**Isobutyl (E)-3-(3-(1-(4-((ethoxycarbonyl)amino)phenyl)butyl)-2-oxo-2,3-dihydrothiazol-5-yl)acrylate (6g):**

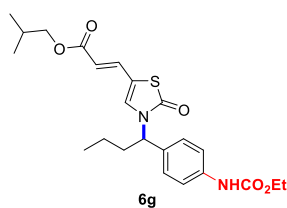

The three-component formal metathesis of 0.3 mmol of ethyl (4-(1-ethoxybutyl)phenyl)carbamate (**1a**, 79.6 mg), 0.3 mmol of *p*-TsOH-H<sub>2</sub>O (**3a**, 57.1 mg) and 0.45 mmol of isobutyl (*E*)-3-(2-methoxythiazol-5-yl)acrylate (**2g**, 108.6 mg) afforded 120.9 mg of **6g** (90%) after flash chromatography on silica gel using petroleum ether and ethyl acetate (3:1, *v/v*) as the eluent.

Light yellow oil. **<sup>1</sup>H NMR (CDCl<sub>3</sub>, 400 MHz):**  $\delta$  = 7.44-7.40 (m, 3H), 7.29-7.24 (m, 3H), 6.87 (s, 1H), 5.79 (d,  $J$  = 15.4 Hz, 1H), 5.43 (t,  $J$  = 7.9 Hz, 1H), 4.21 (q,  $J$  = 7.1 Hz, 2H), 3.94 (d,  $J$  = 6.6 Hz, 2H), 2.11-1.92 (m, 3H), 1.40-1.32 (m, 2H), 1.28 (t,  $J$  = 7.1 Hz, 3H), 0.99-0.94 (m, 9H) ppm. **<sup>13</sup>C NMR (CDCl<sub>3</sub>, 100 MHz):**  $\delta$  = 169.9, 166.3, 153.6, 138.3, 134.7, 133.1, 127.8, 126.4, 118.9,

116.5, 115.6, 70.6, 61.1, 57.2, 35.3, 27.6, 19.4, 18.9, 14.4, 13.5 ppm. **HRMS (ESI)**  $m/z$  calcd for  $C_{23}H_{31}N_2O_5S$   $[M+H]^+$ : 447.1948, found 447.1949.

***Tert*-Butyl (*E*)-3-(3-(1-(4-((ethoxycarbonyl)amino)phenyl)butyl)-2-oxo-2,3-dihydrothiazol-5-yl)acrylate (**6h**):**

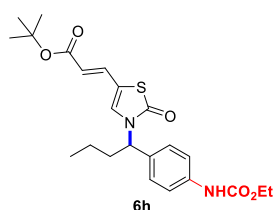

The three-component formal metathesis of 0.3 mmol of ethyl (4-(1-ethoxybutyl)phenyl)carbamate (**1a**, 79.6 mg), 0.3 mmol of *p*-TsOH-H<sub>2</sub>O (**3a**, 57.1 mg) and 0.45 mmol of *tert*-butyl (*E*)-3-(2-methoxythiazol-5-yl)acrylate (**2h**, 108.6 mg) afforded 95.6 mg of **6h** (71%) after flash chromatography on silica gel using petroleum ether and ethyl acetate (3:1, *v/v*) as the eluent.

Light yellow oil. **<sup>1</sup>H NMR (CDCl<sub>3</sub>, 400 MHz):**  $\delta$  = 7.41 (d,  $J$  = 8.4 Hz, 2H), 7.30 (d,  $J$  = 15.4 Hz, 1H), 7.24 (d,  $J$  = 8.6 Hz, 2H), 7.02 (s, 1H), 6.79 (s, 1H), 5.71 (d,  $J$  = 15.4 Hz, 1H), 5.42 (dd,  $J$  = 6.9 Hz, 2.0 Hz, 1H), 4.21 (q,  $J$  = 7.1 Hz, 2H), 2.10-1.98 (m, 2H), 1.48 (s, 9H), 1.38-1.32 (m, 2H), 1.29 (t,  $J$  = 7.1 Hz, 3H), 0.97 (t,  $J$  = 7.4 Hz, 3H) ppm. **<sup>13</sup>C NMR (CDCl<sub>3</sub>, 100 MHz):**  $\delta$  = 170.0, 165.5, 153.6, 138.3, 133.7, 133.3, 127.9, 125.7, 119.0, 118.8, 115.9, 80.6, 61.2, 57.1, 35.4, 28.1, 19.4, 14.4, 13.5 ppm. **HRMS (ESI)**  $m/z$  calcd for  $C_{23}H_{31}N_2O_5S$   $[M+H]^+$ : 447.1948, found 447.1944.

**Ethyl (4-(1-(2-oxo-5-(*N*-(phenylsulfonyl)phenylsulfonamido)thiazol-3(2*H*)-yl)butyl)phenyl)carbamate (**6i**):**

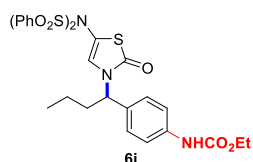

The three-component formal metathesis of 0.3 mmol of ethyl (4-(1-ethoxybutyl)phenyl)carbamate (**1a**, 79.6 mg), 0.3 mmol of *p*-TsOH-H<sub>2</sub>O (**3a**, 57.1 mg) and 0.45 mmol of *N*-(2-methoxythiazol-5-yl)-*N*-(phenylsulfonyl)benzenesulfonamide (**2i**, 184.7 mg) afforded 175.1 mg of **6i** (95%) after flash chromatography on silica gel using petroleum ether and ethyl acetate (3:1, *v/v*) as the eluent.

White solid, m.p. 68-69 °C. **<sup>1</sup>H NMR (CDCl<sub>3</sub>, 400 MHz):**  $\delta$  = 7.91 (d,  $J$  = 7.3 Hz, 4H), 7.67 (t,  $J$  = 7.5 Hz, 2H), 7.50 (t,  $J$  = 7.9 Hz, 4H), 7.41 (d,  $J$  = 8.5 Hz, 2H), 7.12-7.10 (m, 3H), 6.26 (s, 1H), 5.43 (dd,  $J$  = 6.7 Hz, 2.4 Hz, 1H), 4.22 (q,  $J$  = 7.1 Hz, 2H), 1.99-1.80 (m, 2H), 1.32-1.25 (m, 5H),



0.95 (t,  $J = 7.4$  Hz, 3H) ppm.  $^{13}\text{C}$  NMR ( $\text{CDCl}_3$ , 100 MHz):  $\delta = 169.8, 153.5, 138.1, 138.0, 134.5, 133.2, 129.1, 128.4, 127.6, 127.3, 118.8, 109.9, 61.2, 56.7, 35.4, 19.2, 14.4, 13.5$  ppm. HRMS (ESI)  $m/z$  calcd for  $\text{C}_{28}\text{H}_{30}\text{N}_3\text{O}_7\text{S}_3$   $[\text{M}+\text{H}]^+$ : 616.1240, found 616.1237.

#### Ethyl (4-(1-(2-oxo-5-phenylthiazol-3(2H)-yl)butyl)phenyl)carbamate (6j):

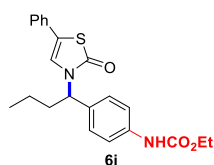

The three-component formal metathesis of 0.3 mmol of ethyl (4-(1-ethoxybutyl)phenyl)carbamate (**1a**, 79.6 mg), 0.3 mmol of *p*-TsOH-H<sub>2</sub>O (**3a**, 57.1 mg) and 0.45 mmol of 2-methoxy-5-phenylthiazole (**2j**, 86.1 mg) afforded 112.1 mg of **6j** (94%) after flash chromatography on silica gel using petroleum ether and ethyl acetate (3:1, *v/v*) as the eluent.

Colorless oil.  $^1\text{H}$  NMR ( $\text{CDCl}_3$ , 400 MHz):  $\delta = 7.43$  (d,  $J = 8.3$  Hz, 2H), 7.33-7.21 (m, 8H), 6.79 (s, 1H), 5.51 (dd,  $J = 6.8$  Hz, 2.1 Hz, 1H), 4.20 (q,  $J = 7.1$  Hz, 2H), 2.14-2.03 (m, 2H), 1.43-1.34 (m, 2H), 1.27 (t,  $J = 7.1$  Hz, 3H), 0.98 (t,  $J = 7.4$  Hz, 3H) ppm.  $^{13}\text{C}$  NMR ( $\text{CDCl}_3$ , 100 MHz):  $\delta = 171.0, 153.6, 138.0, 133.7, 131.3, 128.8, 127.8, 127.6, 124.7, 118.8, 116.4, 61.1, 56.6, 35.2, 19.4, 14.4, 13.6$  ppm. HRMS (ESI)  $m/z$  calcd for  $\text{C}_{22}\text{H}_{25}\text{N}_2\text{O}_3\text{S}$   $[\text{M}+\text{H}]^+$ : 397.1580, found 397.1575.

#### Ethyl (*E*)-(4-(1-(5-(4-methoxystyryl)-2-oxothiazol-3(2H)-yl)butyl)phenyl)carbamate (6k):

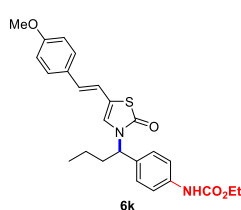

The three-component formal metathesis of 0.3 mmol of ethyl (4-(1-ethoxybutyl)phenyl)carbamate (**1a**, 79.6 mg), 0.3 mmol of *p*-TsOH-H<sub>2</sub>O (**3a**, 57.1 mg) and 0.45 mmol of (*E*)-2-methoxy-5-(4-methoxystyryl)thiazole (**2k**, 111.3 mg) afforded 117.8 mg of **6k** (87%) after flash chromatography on silica gel using petroleum ether and ethyl acetate (3:1, *v/v*) as the eluent.

Light brown oil.  $^1\text{H}$  NMR ( $\text{CDCl}_3$ , 400 MHz):  $\delta = 7.39$  (d,  $J = 8.3$  Hz, 2H), 7.29-7.24 (m, 4H), 7.02 (s, 1H), 6.83 (d,  $J = 8.3$  Hz, 2H), 6.69 (d,  $J = 15.8$  Hz, 1H), 6.51 (s, 1H), 6.38 (d,  $J = 15.8$  Hz, 1H), 5.44 (dd,  $J = 7.0$  Hz, 2.0 Hz, 1H), 4.20 (q,  $J = 7.2$  Hz, 2H), 3.78 (s, 3H), 2.10-1.96 (m, 2H), 1.42-1.34 (m, 2H), 1.28 (t,  $J = 7.2$  Hz, 3H), 0.97 (t,  $J = 7.4$  Hz, 3H) ppm.  $^{13}\text{C}$  NMR ( $\text{CDCl}_3$ , 100 MHz):  $\delta = 170.1, 159.3, 153.6, 138.0, 133.9, 129.2, 127.8, 127.8, 127.3, 119.3, 118.9, 118.9, 117.2, 114.1, 61.2, 56.6, 55.2, 35.3, 19.4, 14.4, 13.6$  ppm. HRMS (ESI)  $m/z$  calcd for  $\text{C}_{25}\text{H}_{29}\text{N}_2\text{O}_4\text{S}$   $[\text{M}+\text{H}]^+$ : 453.1843, found 453.1832.

#### Ethyl 4-(1-(5-bromo-2-oxothiazol-3(2H)-yl)butyl)phenylcarbamate (**6l**):

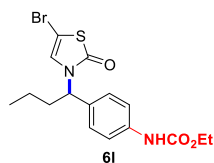

The three-component formal metathesis of 0.3 mmol of ethyl 4-(1-ethoxybutyl)phenylcarbamate (**1a**, 79.6 mg), 0.3 mmol of *p*-TsOH-H<sub>2</sub>O (**3a**, 57.1 mg) and 0.45 mmol of 5-bromo-2-methoxythiazole (**2l**, 87.3 mg) afforded 111.0 mg of **6l** (93%) after flash chromatography on silica gel using petroleum ether and ethyl acetate (3:1, *v/v*) as the eluent.

Colorless oil. <sup>1</sup>H NMR (CDCl<sub>3</sub>, 400 MHz): δ = 7.42 (d, *J* = 8.3 Hz, 2H), 7.24 (d, *J* = 8.6 Hz, 2H), 7.12 (s, 1H), 6.55 (s, 1H), 5.43 (dd, *J* = 6.8 Hz, 2.3 Hz, 1H), 4.22 (q, *J* = 7.1 Hz, 2H), 2.09-1.94 (m, 2H), 1.38-1.31 (m, 2H), 1.29 (t, *J* = 7.1 Hz, 3H), 0.97 (t, *J* = 7.4 Hz, 3H) ppm. <sup>13</sup>C NMR (CDCl<sub>3</sub>, 100 MHz): δ = 170.9, 153.6, 138.1, 133.3, 127.9, 122.2, 118.8, 88.9, 61.2, 56.9, 35.1, 19.4, 14.4, 13.5 ppm. HRMS (ESI) *m/z* calcd for C<sub>16</sub>H<sub>19</sub>BrN<sub>2</sub>O<sub>3</sub>S [M+H]<sup>+</sup>: 399.0373, found 399.0372.

#### Ethyl 4-(1-(5-(methoxymethyl)-2-oxothiazol-3(2H)-yl)butyl)phenylcarbamate (**6m**):

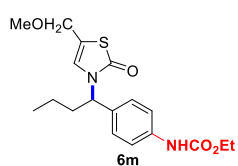

The three-component formal metathesis of 0.3 mmol of ethyl 4-(1-ethoxybutyl)phenylcarbamate (**1a**, 79.6 mg), 0.3 mmol of *p*-TsOH-H<sub>2</sub>O (**3a**, 57.1 mg) and 0.45 mmol of 2-methoxy-5-(methoxymethyl)thiazole (**2m**, 71.6 mg) afforded 55.4 mg of **6m** (51%) after flash chromatography on silica gel using petroleum ether and ethyl acetate (3:1, *v/v*) as the eluent.

Colorless oil. <sup>1</sup>H NMR (CDCl<sub>3</sub>, 400 MHz): δ = 7.38 (d, *J* = 8.2 Hz, 2H), 7.24 (d, *J* = 8.6 Hz, 2H), 7.02 (s, 1H), 6.47 (s, 1H), 5.42 (dd, *J* = 6.7 Hz, 2.4 Hz, 1H), 4.22 (s, 2H), 4.21 (q, *J* = 7.1 Hz, 2H), 3.31 (s, 3H), 2.10-1.94 (m, 2H), 1.36-1.28 (m, 5H), 0.96 (t, *J* = 7.4 Hz, 3H) ppm. <sup>13</sup>C NMR (CDCl<sub>3</sub>, 100 MHz): δ = 172.0, 153.6, 137.9, 133.9, 127.9, 119.9, 118.8, 115.4, 68.0, 61.2, 57.7, 56.4, 35.3, 19.4, 14.5, 13.6 ppm. HRMS (ESI) *m/z* calcd for C<sub>18</sub>H<sub>25</sub>N<sub>2</sub>O<sub>4</sub>S [M+H]<sup>+</sup>: 365.1530, found 365.1526.

#### *Tert*-Butyl 4-(1-(2-oxothiazol-3(2H)-yl)butyl)phenylcarbamate (**6n**):

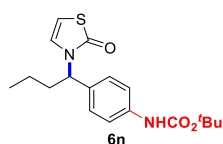

The three-component formal metathesis of 0.3 mmol of *tert*-butyl 4-(1-ethoxybutyl)phenylcarbamate (**1b**, 88.0 mg), 0.3 mmol of

*p*-TsOH-H<sub>2</sub>O (**3a**, 57.1 mg) and 0.45 mmol of 2-methoxythiazole (**2a**, 43 μL, 51.8 mg) afforded 74.9 mg of **6n** (72%) after flash chromatography on silica gel using petroleum ether and ethyl acetate (3:1, *v/v*) as the eluent.

Colorless oil. <sup>1</sup>H NMR (CDCl<sub>3</sub>, 400 MHz): δ = 7.36 (d, *J* = 8.3 Hz, 2H), 7.23 (d, *J* = 8.6 Hz, 2H), 6.81 (s, 1H), 6.51 (d, *J* = 5.5 Hz, 1H), 6.06 (d, *J* = 5.5 Hz, 1H), 5.43 (dd, *J* = 6.7 Hz, 2.4 Hz, 1H), 2.10-1.94 (m, 2H), 1.50 (s, 9H), 1.38-1.29 (m, 2H), 0.96 (t, *J* = 7.4 Hz, 3H) ppm. <sup>13</sup>C NMR (CDCl<sub>3</sub>, 100 MHz): δ = 172.0, 152.7, 138.2, 133.7, 127.8, 121.7, 118.7, 101.3, 80.5, 56.5, 35.3, 28.2, 19.4, 13.6 ppm. HRMS (ESI) *m/z* calcd for C<sub>18</sub>H<sub>25</sub>N<sub>2</sub>O<sub>3</sub>S [M+H]<sup>+</sup>: 349.1580, found 349.1577.

#### Methyl (4-(1-(2-oxothiazol-3(2*H*)-yl)butyl)phenyl)carbamate (**6o**):

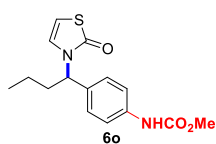

The three-component formal metathesis of 0.3 mmol of methyl (4-(1-ethoxybutyl)phenyl)carbamate (**1c**, 75.4 mg), 0.3 mmol of *p*-TsOH-H<sub>2</sub>O (**3a**, 57.1 mg) and 0.45 mmol of 2-methoxythiazole (**2a**, 43 μL, 51.8 mg) afforded 60.9 mg of **6o** (66%) after flash chromatography on silica gel using petroleum ether and ethyl acetate (3:1, *v/v*) as the eluent.

White solid, m.p. 165-166 °C. <sup>1</sup>H NMR (DMSO-*d*<sub>6</sub>, 400 MHz): δ = 9.69 (s, 1H), 7.43 (d, *J* = 8.6 Hz, 2H), 7.27 (d, *J* = 8.7 Hz, 2H), 7.15 (d, *J* = 5.5 Hz, 1H), 6.44 (d, *J* = 5.4 Hz, 1H), 5.22 (dd, *J* = 6.3 Hz, 3.4 Hz, 1H), 3.65 (s, 3H), 2.14-1.95 (m, 2H), 1.25-1.15 (m, 2H), 0.89 (t, *J* = 7.4 Hz, 3H) ppm. <sup>13</sup>C NMR (DMSO-*d*<sub>6</sub>, 100 MHz): δ = 171.0, 154.0, 138.7, 134.0, 127.5, 123.4, 118.3, 101.1, 56.5, 51.6, 34.6, 19.1, 13.3 ppm. HRMS (ESI) *m/z* calcd for C<sub>15</sub>H<sub>19</sub>N<sub>2</sub>O<sub>3</sub>S [M+H]<sup>+</sup>: 307.1111, found 307.1107.

#### Butyl (4-(1-(2-oxothiazol-3(2*H*)-yl)butyl)phenyl)carbamate (**6p**):

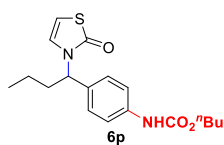

The three-component formal metathesis of 0.3 mmol of butyl (4-(1-ethoxybutyl)phenyl)carbamate (**1d**, 88.0 mg), 0.3 mmol of *p*-TsOH-H<sub>2</sub>O (**3a**, 57.1 mg) and 0.45 mmol of 2-methoxythiazole (**2a**, 43 μL, 51.8 mg) afforded 73.6 mg of **6p** (70%) after flash chromatography on silica gel using petroleum ether and ethyl acetate (3:1, *v/v*) as the eluent.

Colorless oil. <sup>1</sup>H NMR (CDCl<sub>3</sub>, 400 MHz): δ = 7.39 (d, *J* = 8.3 Hz, 2H), 7.23 (d, *J* = 8.7 Hz, 2H),

7.05 (s, 1H), 6.53 (d,  $J = 5.5$  Hz, 1H), 6.07 (d,  $J = 5.5$  Hz, 1H), 5.43 (dd,  $J = 6.8$  Hz, 2.4 Hz, 1H), 4.15 (t,  $J = 6.7$  Hz, 2H), 2.11-1.94 (m, 2H), 1.67-1.60 (m, 2H), 1.45-1.26 (m, 4H), 0.98-0.92 (m, 6H) ppm.  $^{13}\text{C}$  NMR ( $\text{CDCl}_3$ , 100 MHz):  $\delta = 172.1, 153.7, 137.9, 134.0, 127.8, 121.7, 118.8, 101.4, 65.1, 56.6, 35.4, 30.9, 19.4, 19.0, 13.6, 13.6$  ppm. HRMS (ESI)  $m/z$  calcd for  $\text{C}_{18}\text{H}_{25}\text{N}_2\text{O}_3\text{S}$   $[\text{M}+\text{H}]^+$ : 349.1580, found 349.1576.

### 2.3 General Procedure and Characterization Data for the One-pot Direct Benzylic C(sp<sup>3</sup>)-N Coupling of Alkyl Benzene **7** and 2-Alkoxythiazole **2** (Results Shown in Table 3)

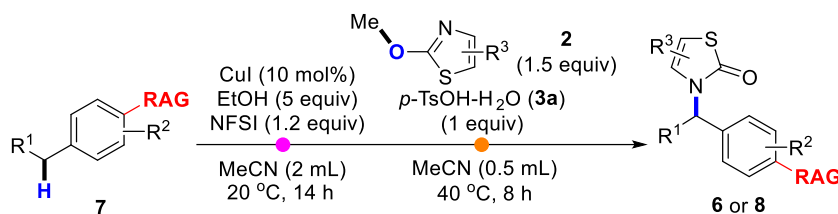

To a reaction tube charged with CuI (5.7 mg, 0.03 mmol, 10 mol%) and NFSI (113.5 mg, 0.36 mmol, 1.2 equiv) was added a solution of alkyl benzene (**7**, 0.3 mmol, 1 equiv) and ethanol (88  $\mu\text{L}$ , 1.5 mmol, 5 equiv) in anhydrous MeCN (2 mL, 0.15 M of **7**) via a syringe under argon (1 atm) at 20 °C (oil bath temperature), and the reaction mixture was stirred for 14 hours at 20 °C (oil bath temperature). Then a solution of 2-alkoxythiazole (**2**, 0.45 mmol, 1.5 equiv) and *p*-TsOH-H<sub>2</sub>O (**3a**, 57.1 mg, 0.3 mmol, 1 equiv) in anhydrous MeCN (0.5 mL) via a syringe was added, and the reaction temperature was elevated to 40 °C (oil bath temperature). After stirring for another 8 hours at this temperature, the reaction mixture was quenched with Na<sub>2</sub>CO<sub>3</sub> (aq.) and extracted with ethyl acetate. The combined organic phase was concentrated *in vacuo* to give dark residue, which was then purified by flash chromatography using petroleum ether and ethyl acetate as the eluent on silica gel to afford corresponding thiazol-2(3*H*)-one products **6a**, **6c-l**, **6n-p** and **8a-h**.

#### Ethyl (4-(1-(2-oxothiazol-3(2*H*)-yl)butyl)phenyl)carbamate (**6a**):

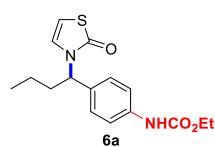

The one-pot direct benzylic C-N coupling of 0.3 mmol of ethyl (4-butylphenyl)carbamate (**7a**, 66.4 mg) with 0.45 mmol of 2-methoxythiazole (**2a**, 43  $\mu\text{L}$ , 51.8 mg) afforded 64.7 mg of **6a** (67%) after

flash chromatography on silica gel using petroleum ether and ethyl acetate (3:1, *v/v*) as the eluent.

See **Section 2.2** for characterization data of **6a**.

**Methyl 3-(1-(4-((ethoxycarbonyl)amino)phenyl)butyl)-2-oxo-2,3-dihydrothiazole-5-carboxylate (6c):**

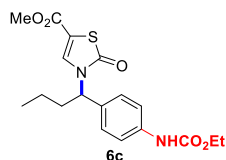

The one-pot direct benzylic C-N coupling of 0.3 mmol of ethyl (4-butylphenyl)carbamate (**7a**, 66.4 mg) with 0.45 mmol of methyl 2-methoxythiazole-5-carboxylate (**2c**, 77.9 mg) afforded 84.4 mg of **6c** (74%) after flash chromatography on silica gel using petroleum ether and ethyl acetate (3:1, v/v) as the eluent.

See **Section 2.2** for characterization data of **6c**.

**Ethyl 4-(1-(5-(benzylcarbamoyl)-2-oxothiazol-3(2H)-yl)butyl)phenylcarbamate (6d):**

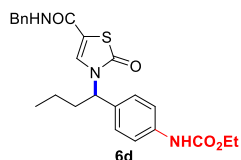

The one-pot direct benzylic C-N coupling of 0.3 mmol of ethyl (4-butylphenyl)carbamate (**7a**, 66.4 mg) with 0.45 mmol of *N*-benzyl-2-methoxythiazole-5-carboxamide (**2d**, 111.7 mg) afforded 84.4 mg of **6d** (78%) after flash chromatography on silica gel using petroleum ether and ethyl acetate (3:1, v/v) as the eluent.

See **Section 2.2** for characterization data of **6d**.

**Methyl (E)-3-(3-(1-(4-((ethoxycarbonyl)amino)phenyl)butyl)-2-oxo-2,3-dihydrothiazol-5-yl)acrylate (6e):**

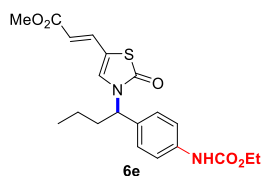

The one-pot direct benzylic C-N coupling of 0.3 mmol of ethyl (4-butylphenyl)carbamate (**7a**, 66.4 mg) with 0.45 mmol of methyl (*E*)-3-(2-methoxythiazol-5-yl)acrylate (**2e**, 89.6 mg) afforded 93.1 mg of **6e** (77%) after flash chromatography on silica gel using petroleum ether and ethyl acetate (3:1, v/v) as the eluent.

See **Section 2.2** for characterization data of **6e**.

**Ethyl (E)-3-(3-(1-(4-((ethoxycarbonyl)amino)phenyl)butyl)-2-oxo-2,3-dihydrothiazol-5-yl)acrylate (6f):**

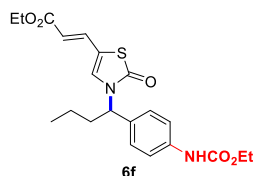

The one-pot direct benzylic C-N coupling of 0.3 mmol of ethyl (4-butylphenyl)carbamate (**7a**, 66.4 mg) with 0.45 mmol of ethyl (*E*)-3-(2-methoxythiazol-5-yl)acrylate (**2f**, 96.0 mg) afforded 94.3 mg of **6f** (75%) after flash chromatography on silica gel using petroleum ether and ethyl acetate (3:1, *v/v*) as the eluent.

See **Section 2.2** for characterization data of **6f**.

**Isobutyl (*E*)-3-(3-(1-(4-((ethoxycarbonyl)amino)phenyl)butyl)-2-oxo-2,3-dihydrothiazol-5-yl)acrylate (**6g**):**

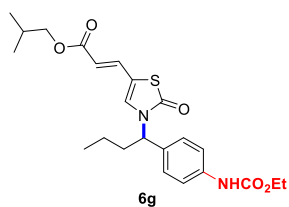

The one-pot direct benzylic C-N coupling of 0.3 mmol of ethyl (4-butylphenyl)carbamate (**7a**, 66.4 mg) with 0.45 mmol of isobutyl (*E*)-3-(2-methoxythiazol-5-yl)acrylate (**2g**, 108.6 mg) afforded 105.5 mg of **6g** (79%) after flash chromatography on silica gel using petroleum ether and ethyl acetate (3:1, *v/v*) as the eluent.

See **Section 2.2** for characterization data of **6g**.

***Tert*-Butyl (*E*)-3-(3-(1-(4-((ethoxycarbonyl)amino)phenyl)butyl)-2-oxo-2,3-dihydrothiazol-5-yl)acrylate (**6h**):**

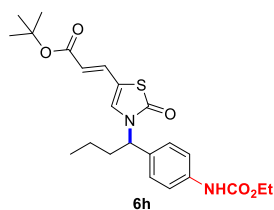

The one-pot direct benzylic C-N coupling of 0.3 mmol of ethyl (4-butylphenyl)carbamate (**7a**, 66.4 mg) with 0.45 mmol of *tert*-butyl (*E*)-3-(2-methoxythiazol-5-yl)acrylate (**2h**, 108.6 mg) afforded 82.0 mg of **6h** (61%) after flash chromatography on silica gel using petroleum ether and ethyl acetate (3:1, *v/v*) as the eluent.

See **Section 2.2** for characterization data of **6h**.

**Ethyl (4-(1-(2-oxo-5-(*N*-(phenylsulfonyl)phenylsulfonamido)thiazol-3(*2H*)-yl)butyl)phenyl)carbamate (**6i**):**

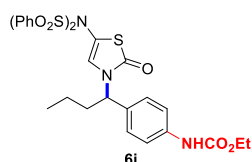

The one-pot direct benzylic C-N coupling of 0.3 mmol of ethyl (4-butylphenyl)carbamate (**7a**, 66.4 mg) with 0.45 mmol of

*N*-(2-methoxythiazol-5-yl)-*N*-(phenylsulfonyl)benzenesulfonamide (**2i**, 184.7 mg) afforded 129.6 mg of **6i** (70%) after flash chromatography on silica gel using petroleum ether and ethyl acetate (3:1, *v/v*) as the eluent.

See **Section 2.2** for characterization data of **6i**.

**Ethyl (4-(1-(2-oxo-5-phenylthiazol-3(2*H*)-yl)butyl)phenyl)carbamate (6j):**

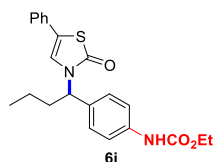

The one-pot direct benzylic C-N coupling of 0.3 mmol of ethyl (4-butylphenyl)carbamate (**7a**, 66.4 mg) with 0.45 mmol of 2-methoxy-5-phenylthiazole (**2j**, 86.1 mg) afforded 87.8 mg of **6j** (74%) after flash chromatography on silica gel using petroleum ether and ethyl acetate (3:1, *v/v*) as the eluent.

See **Section 2.2** for characterization data of **6j**.

**Ethyl (*E*)-(4-(1-(5-(4-methoxystyryl)-2-oxothiazol-3(2*H*)-yl)butyl)phenyl)carbamate (6k):**

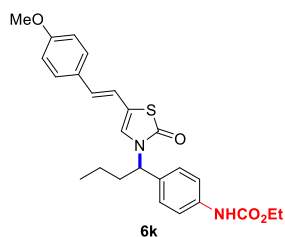

The one-pot direct benzylic C-N coupling of 0.3 mmol of ethyl (4-butylphenyl)carbamate (**7a**, 66.4 mg) with 0.45 mmol of (*E*)-2-methoxy-5-(4-methoxystyryl)thiazole (**2k**, 111.3 mg) afforded 96.0 mg of **6k** (71%) after flash chromatography on silica gel using

petroleum ether and ethyl acetate (3:1, *v/v*) as the eluent.

See **Section 2.2** for characterization data of **6k**.

**Ethyl (4-(1-(5-bromo-2-oxothiazol-3(2*H*)-yl)butyl)phenyl)carbamate (6l):**

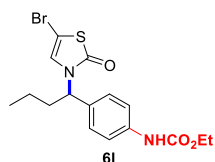

The one-pot direct benzylic C-N coupling of 0.3 mmol of ethyl (4-butylphenyl)carbamate (**7a**, 66.4 mg) with 0.45 mmol of 5-bromo-2-methoxythiazole (**2l**, 87.3 mg) afforded 97.6 mg of **6l** (81%)

after flash chromatography on silica gel using petroleum ether and ethyl acetate (3:1, *v/v*) as the eluent.

See **Section 2.2** for characterization data of **6l**.

***Tert*-Butyl (4-(1-(2-oxothiazol-3(2*H*)-yl)butyl)phenyl)carbamate (6n):**

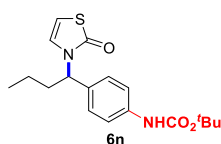

The one-pot direct benzylic C-N coupling of 0.3 mmol of *tert*-butyl (4-butylphenyl)carbamate (**7b**, 74.8 mg) with 0.45 mmol of 2-methoxythiazole (**2a**, 43  $\mu$ L, 51.8 mg) afforded 61.3 mg of **6n** (59%) after flash chromatography on silica gel using petroleum ether and ethyl acetate (3:1, *v/v*) as the eluent. See **Section 2.2** for characterization data of **6n**.

**Methyl (4-(1-(2-oxothiazol-3(2*H*)-yl)butyl)phenyl)carbamate (6o):**

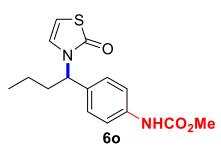

The one-pot direct benzylic C-N coupling of 0.3 mmol of methyl (4-butylphenyl)carbamate (**7c**, 62.2 mg) with 0.45 mmol of 2-methoxythiazole (**2a**, 43  $\mu$ L, 51.8 mg) afforded 52.1 mg of **6o** (57%) after flash chromatography on silica gel using petroleum ether and ethyl acetate (3:1, *v/v*) as the eluent. See **Section 2.2** for characterization data of **6o**.

**Butyl (4-(1-(2-oxothiazol-3(2*H*)-yl)butyl)phenyl)carbamate (6p):**

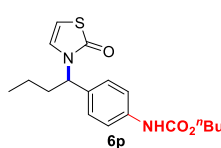

The one-pot direct benzylic C-N coupling of 0.3 mmol of butyl (4-butylphenyl)carbamate (**7d**, 74.8 mg) with 0.45 mmol of 2-methoxythiazole (**2a**, 43  $\mu$ L, 51.8 mg) afforded 68.3 mg of **6p** (65%) after flash chromatography on silica gel using petroleum ether and ethyl acetate (3:1, *v/v*) as the eluent. See **Section 2.2** for characterization data of **6p**.

**Ethyl (4-(1-(2-oxothiazol-3(2*H*)-yl)ethyl)phenyl)carbamate (8a):**

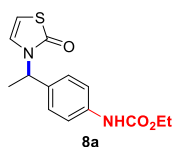

The one-pot direct benzylic C-N coupling of 0.3 mmol of ethyl (4-ethylphenyl)carbamate (**7f**, 58.0 mg) with 0.45 mmol of 2-methoxythiazole (**2a**, 43  $\mu$ L, 51.8 mg) afforded 65.9 mg of **8a** (75%) after flash chromatography on silica gel using petroleum ether and ethyl acetate (3:1, *v/v*) as the eluent.

Light yellow oil. <sup>1</sup>H NMR (CDCl<sub>3</sub>, 400 MHz):  $\delta$  = 7.39 (d, *J* = 8.3 Hz, 2H), 7.23 (d, *J* = 8.6 Hz, 2H), 6.85 (s, 1H), 6.44 (d, *J* = 5.5 Hz, 1H), 6.07 (d, *J* = 5.5 Hz, 1H), 5.62 (q, *J* = 7.1 Hz, 1H), 4.22 (q, *J* = 7.1 Hz, 2H), 1.69 (d, *J* = 7.1 Hz, 3H), 1.30 (t, *J* = 6.9 Hz, 3H) ppm. <sup>13</sup>C NMR (CDCl<sub>3</sub>, 100 MHz):  $\delta$  = 171.8, 153.6, 137.9, 134.6, 127.5, 121.8, 118.8, 101.4, 61.3, 52.2, 19.2, 14.5 ppm. HRMS (ESI) *m/z* calcd for C<sub>14</sub>H<sub>17</sub>N<sub>2</sub>O<sub>3</sub>S [M+H]<sup>+</sup>: 293.0954, found 293.0950.



#### Ethyl (4-(1-(2-oxothiazol-3(2H)-yl)propyl)phenyl)carbamate (**8b**):

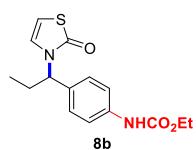

The one-pot direct benzylic C-N coupling of 0.3 mmol of ethyl (4-propylphenyl)carbamate (**7g**, 62.2 mg) with 0.45 mmol of 2-methoxythiazole (**2a**, 43  $\mu$ L, 51.8 mg) afforded 49.9 mg of **8b** (54%) after flash chromatography on silica gel using petroleum ether and ethyl acetate (3:1, *v/v*) as the eluent. White solid, m.p. 146-147 °C.  $^1\text{H NMR}$  ( $\text{CDCl}_3$ , 400 MHz):  $\delta$  = 7.38 (d,  $J$  = 8.2 Hz, 2H), 7.24 (d,  $J$  = 8.5 Hz, 2H), 6.92 (s, 1H), 6.51 (d,  $J$  = 5.5 Hz, 1H), 6.08 (d,  $J$  = 5.5 Hz, 1H), 5.33 (dd,  $J$  = 6.6 Hz, 2.5 Hz, 1H), 4.21 (q,  $J$  = 7.1 Hz, 2H), 2.20-1.97 (m, 2H), 1.30 (t,  $J$  = 7.1 Hz, 3H), 0.96 (t,  $J$  = 7.3 Hz, 3H) ppm.  $^{13}\text{C NMR}$  ( $\text{CDCl}_3$ , 100 MHz):  $\delta$  = 172.2, 153.6, 137.9, 133.9, 127.9, 121.7, 118.9, 101.4, 61.2, 58.4, 26.5, 14.5, 10.8 ppm. HRMS (ESI)  $m/z$  calcd for  $\text{C}_{15}\text{H}_{19}\text{N}_2\text{O}_3\text{S}$  [ $\text{M}+\text{H}$ ] $^+$ : 307.1111, found 307.1106.

#### Ethyl (4-(2-methyl-1-(2-oxothiazol-3(2H)-yl)propyl)phenyl)carbamate (**8c**):

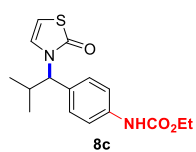

The one-pot direct benzylic C-N coupling of 0.3 mmol of ethyl (4-isobutylphenyl)carbamate (**7h**, 66.4 mg) with 0.45 mmol of 2-methoxythiazole (**2a**, 43  $\mu$ L, 51.8 mg) afforded 49.2 mg of **8c** (51%) after flash chromatography on silica gel using petroleum ether and ethyl acetate (3:1, *v/v*) as the eluent. Light yellow oil.  $^1\text{H NMR}$  ( $\text{CDCl}_3$ , 400 MHz):  $\delta$  = 7.38 (d,  $J$  = 8.3 Hz, 2H), 7.29 (d,  $J$  = 8.6 Hz, 2H), 6.91 (s, 1H), 6.65 (d,  $J$  = 5.5 Hz, 1H), 6.07 (d,  $J$  = 5.5 Hz, 1H), 4.99 (d,  $J$  = 11.3 Hz, 1H), 4.21 (q,  $J$  = 7.1 Hz, 2H), 2.45 (d-spet,  $J$  = 11.4 Hz, 6.6 Hz, 1H), 1.30 (t,  $J$  = 7.1 Hz, 3H), 0.97 (d,  $J$  = 6.6 Hz, 3H), 0.91 (d,  $J$  = 6.5 Hz, 3H) ppm.  $^{13}\text{C NMR}$  ( $\text{CDCl}_3$ , 100 MHz):  $\delta$  = 172.1, 153.6, 137.9, 133.4, 128.6, 121.7, 118.9, 101.5, 63.9, 61.3, 30.8, 20.3, 19.5, 14.5 ppm. HRMS (ESI)  $m/z$  calcd for  $\text{C}_{16}\text{H}_{21}\text{N}_2\text{O}_3\text{S}$  [ $\text{M}+\text{H}$ ] $^+$ : 321.1267, found 321.1264.

#### Ethyl (4-(1-(2-oxothiazol-3(2H)-yl)hexyl)phenyl)carbamate (**8d**):

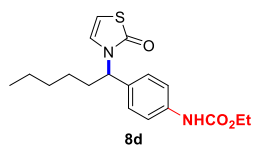

The one-pot direct benzylic C-N coupling of 0.3 mmol of ethyl (4-hexylphenyl)carbamate (**7i**, 74.8 mg) with 0.45 mmol of 2-methoxythiazole (**2a**, 43  $\mu$ L, 51.8 mg) afforded 75.0 mg of **8d** (72%) after flash chromatography on silica gel using petroleum ether and ethyl acetate (3:1, *v/v*) as the

eluent.

Colorless oil. **<sup>1</sup>H NMR (CDCl<sub>3</sub>, 400 MHz):**  $\delta$  = 7.39 (d,  $J$  = 8.3 Hz, 2H), 7.24 (d,  $J$  = 8.6 Hz, 2H), 7.04 (s, 1H), 6.53 (d,  $J$  = 5.5 Hz, 1H), 6.07 (d,  $J$  = 5.5 Hz, 1H), 5.41 (dd,  $J$  = 6.7 Hz, 2.4 Hz, 1H), 4.21 (q,  $J$  = 7.1 Hz, 2H), 2.12-1.94 (m, 2H), 1.33-1.26 (m, 9H), 0.86 (t,  $J$  = 6.9 Hz, 3H) ppm. **<sup>13</sup>C NMR (CDCl<sub>3</sub>, 100 MHz):**  $\delta$  = 172.1, 153.6, 137.9, 134.1, 127.8, 121.7, 118.8, 101.4, 61.2, 56.9, 33.3, 31.3, 25.8, 22.3, 14.5, 13.9 ppm. **HRMS (ESI)  $m/z$**  calcd for C<sub>18</sub>H<sub>24</sub>N<sub>2</sub>O<sub>3</sub>SNa [M+Na]<sup>+</sup>: 371.1400, found 371.1396.

**Ethyl (3-methyl-4-(1-(2-oxothiazol-3(2H)-yl)butyl)phenyl)carbamate (8e):**

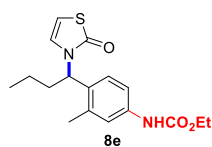

The one-pot direct benzylic C-N coupling of 0.3 mmol of ethyl (4-butyl-3-methylphenyl)carbamate (**7j**, 70.6 mg) with 0.45 mmol of 2-methoxythiazole (**2a**, 43  $\mu$ L, 51.8 mg) afforded 81.8 mg of **8e** (82%) after flash chromatography on silica gel using petroleum ether and ethyl acetate (3:1,  $v/v$ ) as the eluent.

Light yellow oil. **<sup>1</sup>H NMR (CDCl<sub>3</sub>, 400 MHz):**  $\delta$  = 7.38 (dd,  $J$  = 8.5 Hz, 2.3 Hz, 1H), 7.30 (d,  $J$  = 8.5 Hz, 1H), 7.20 (d,  $J$  = 2.3 Hz, 1H), 7.13 (s, 1H), 6.37 (d,  $J$  = 5.5 Hz, 1H), 6.02 (d,  $J$  = 5.5 Hz, 1H), 5.54 (t,  $J$  = 7.7 Hz, 1H), 4.21 (q,  $J$  = 7.1 Hz, 2H), 2.25 (s, 3H), 2.05-1.98 (m, 2H), 1.44-1.35 (m, 2H), 1.29 (t,  $J$  = 7.1 Hz, 3H), 0.97 (t,  $J$  = 7.3 Hz, 3H) ppm. **<sup>13</sup>C NMR (CDCl<sub>3</sub>, 100 MHz):**  $\delta$  = 171.7, 153.6, 138.6, 137.9, 131.6, 126.6, 122.1, 120.9, 116.0, 101.2, 61.1, 53.5, 35.8, 19.4, 19.3, 14.4, 13.7 ppm. **HRMS (ESI)  $m/z$**  calcd for C<sub>17</sub>H<sub>23</sub>N<sub>2</sub>O<sub>3</sub>S [M+H]<sup>+</sup>: 335.1424, found 335.1421.

**Ethyl (3-butyl-4-(1-(2-oxothiazol-3(2H)-yl)butyl)phenyl)carbamate (8f):**

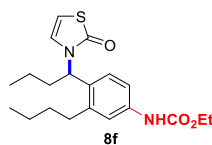

The one-pot direct benzylic C-N coupling of 0.3 mmol of ethyl (3,4-dibutylphenyl)carbamate (**7k**, 83.2 mg) with 0.45 mmol of 2-methoxythiazole (**2a**, 43  $\mu$ L, 51.8 mg) afforded 94.4 mg of **8f** (84%) after flash chromatography on silica gel using petroleum ether and ethyl acetate (3:1,  $v/v$ ) as the eluent.

Colorless oil. **<sup>1</sup>H NMR (CDCl<sub>3</sub>, 400 MHz):**  $\delta$  = 7.37-7.32 (m, 2H), 7.23 (d,  $J$  = 2.1 Hz, 1H), 6.99 (s, 1H), 6.38 (d,  $J$  = 5.5 Hz, 1H), 6.01 (d,  $J$  = 5.5 Hz, 1H), 5.62 (t,  $J$  = 7.7 Hz, 1H), 4.22 (q,  $J$  = 7.1 Hz, 2H), 2.69-2.50 (m, 2H), 2.09-1.93 (m, 2H), 1.49-1.28 (m, 9H), 0.97 (t,  $J$  = 7.3 Hz, 3H), 0.89 (t,  $J$  = 7.1 Hz, 3H) ppm. **<sup>13</sup>C NMR (CDCl<sub>3</sub>, 100 MHz):**  $\delta$  = 171.5, 153.6, 143.7, 138.0, 130.9, 126.9,

122.1, 120.0, 116.0, 101.1, 61.1, 52.9, 36.0, 33.5, 31.9, 22.7, 19.5, 14.5, 13.9, 13.7 ppm. **HRMS (ESI)**  $m/z$  calcd for  $C_{20}H_{29}N_2O_3S$   $[M+H]^+$ : 377.1893, found 377.1896.

**Ethyl (4-(1-(2-oxothiazol-3(2H)-yl)propyl)-3-propylphenyl)carbamate (8g):**

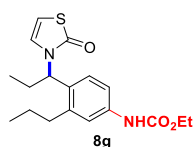

The one-pot direct benzylic C-N coupling of 0.3 mmol of ethyl (3,4-dipropylphenyl)carbamate (**7l**, 74.8 mg) with 0.45 mmol of 2-methoxythiazole (**2a**, 43  $\mu$ L, 51.8 mg) afforded 77.1 mg of **8g** (74%) after flash chromatography on silica gel using petroleum ether and ethyl acetate (3:1,  $v/v$ ) as the eluent. Colorless oil.  **$^1H$  NMR (CDCl<sub>3</sub>, 400 MHz):**  $\delta$  = 7.37 (d,  $J$  = 8.5 Hz, 1H), 7.33 (d,  $J$  = 8.5 Hz, 1H), 7.23 (s, 1H), 7.04 (s, 1H), 6.38 (d,  $J$  = 5.5 Hz, 1H), 6.01 (d,  $J$  = 5.5 Hz, 1H), 5.52 (t,  $J$  = 7.7 Hz, 1H), 4.22 (q,  $J$  = 7.1 Hz, 2H), 2.67-2.47 (m, 2H), 2.10-2.02 (m, 2H), 1.56-1.34 (m, 2H), 1.30 (t,  $J$  = 7.1 Hz, 3H), 0.97 (t,  $J$  = 7.3 Hz, 3H), 0.94 (t,  $J$  = 7.4 Hz, 3H) ppm.  **$^{13}C$  NMR (CDCl<sub>3</sub>, 100 MHz):**  $\delta$  = 171.6, 153.6, 143.5, 138.0, 130.7, 126.9, 122.1, 120.1, 116.0, 101.1, 61.1, 54.7, 34.1, 26.9, 24.4, 14.5, 14.0, 11.0 ppm. **HRMS (ESI)**  $m/z$  calcd for  $C_{18}H_{25}N_2O_3S$   $[M+H]^+$ : 349.1580, found 349.1576.

**Ethyl (3-ethyl-4-(1-(2-oxothiazol-3(2H)-yl)ethyl)phenyl)carbamate (8h):**

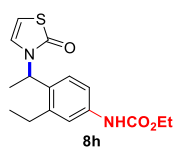

The one-pot direct benzylic C-N coupling of 0.3 mmol of ethyl (3,4-diethylphenyl)carbamate (**7m**, 66.4 mg) with 0.45 mmol of 2-methoxythiazole (**2a**, 43  $\mu$ L, 51.8 mg) afforded 74.5 mg of **8h** (78%) after flash chromatography on silica gel using petroleum ether and ethyl acetate (3:1,  $v/v$ ) as the eluent. Light yellow solid, m.p. 144-145 °C.  **$^1H$  NMR (CDCl<sub>3</sub>, 400 MHz):**  $\delta$  = 7.39-7.35 (m, 2H), 7.24 (s, 1H), 7.00 (s, 1H), 6.29 (d,  $J$  = 5.5 Hz, 1H), 6.01 (d,  $J$  = 5.5 Hz, 1H), 5.73 (q,  $J$  = 7.0 Hz, 1H), 4.22 (q,  $J$  = 7.1 Hz, 2H), 2.67-2.44 (m, 2H), 1.66 (d,  $J$  = 7.0 Hz, 3H), 1.30 (t,  $J$  = 7.1 Hz, 3H), 1.09 (t,  $J$  = 7.5 Hz, 3H) ppm.  **$^{13}C$  NMR (CDCl<sub>3</sub>, 100 MHz):**  $\delta$  = 171.2, 153.6, 144.3, 138.4, 131.4, 126.6, 122.1, 119.2, 116.0, 101.2, 61.2, 49.2, 24.7, 19.4, 14.6, 14.5 ppm. **HRMS (ESI)**  $m/z$  calcd for  $C_{16}H_{21}N_2O_3S$   $[M+H]^+$ : 321.1267, found 321.1268.

### 3. Control Experiments for Mechanistic Studies

#### 3.1 Control Experiments Demonstrating the Significance of the Remote Activating Strategy in the Three-component Formal Metathesis (Results Shown in Scheme 1)

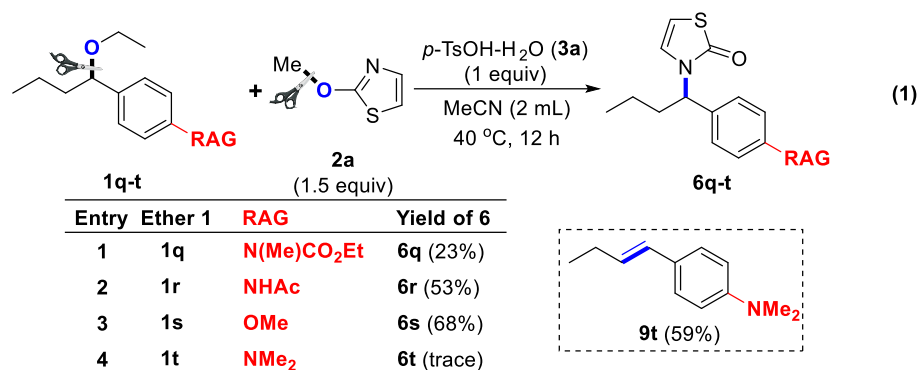

To a reaction tube charged with *p*-TsOH-H<sub>2</sub>O (**3a**, 57.1 mg, 0.3 mmol, 1 equiv) was added a solution of **1q-t** (0.3 mmol, 1 equiv) and 2-methoxythiazole (**2a**, 43 μL, 51.8 mg, 0.45 mmol, 1.5 equiv) in anhydrous MeCN (2 mL, 0.15 M of **1**) via a syringe under argon (1 atm), and the reaction mixture was stirred for 12 hours at 40 °C (oil bath temperature). After quenched with Na<sub>2</sub>CO<sub>3</sub> (aq.), the mixture was extracted with ethyl acetate. The combined organic phase was concentrated *in vacuo* to give dark residue, which was then purified by flash chromatography using petroleum ether and ethyl acetate as the eluent on silica gel to afford corresponding thiazol-2(3*H*)-one products **6q-t**.

#### Ethyl methyl(4-(1-(2-oxothiazol-3(2*H*)-yl)butyl)phenyl)carbamate (**6q**):

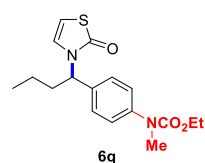

The three-component formal metathesis of 0.3 mmol of ethyl methyl(4-(1-ethoxybutyl)phenyl)carbamate (**1q**, 83.8 mg), 0.3 mmol of *p*-TsOH-H<sub>2</sub>O (**3a**, 57.1 mg) and 0.45 mmol of 2-methoxythiazole (**2a**, 43 μL, 51.8 mg) afforded 22.8 mg of **6q** (23%) after flash chromatography on silica gel using petroleum ether and ethyl acetate (3:1, *v/v*) as the eluent.

Light yellow oil. <sup>1</sup>H NMR (CDCl<sub>3</sub>, 400 MHz): δ = 7.29-7.23 (m, 4H), 6.56 (d, *J* = 5.2 Hz, 1H), 6.10 (d, *J* = 5.2 Hz, 1H), 5.46 (t, *J* = 8.1 Hz, 1H), 4.18 (q, *J* = 7.0 Hz, 2H), 3.29 (s, 3H), 2.13-1.97 (m, 2H), 1.41-1.34 (m, 2H), 1.25 (t, *J* = 7.3 Hz, 3H), 0.98 (t, *J* = 7.3 Hz, 3H) ppm. <sup>13</sup>C NMR (CDCl<sub>3</sub>, 100 MHz): δ = 172.1, 155.5, 143.0, 136.8, 127.5, 125.6, 121.7, 101.5, 61.8, 56.5, 37.3, 35.5, 19.5, 14.6, 13.6 ppm. HRMS (ESI) *m/z* calcd for C<sub>17</sub>H<sub>23</sub>N<sub>2</sub>O<sub>3</sub>S [M+H]<sup>+</sup>: 335.1424, found 335.1421.

### Ethyl methyl(4-(1-(2-oxothiazol-3(2H)-yl)butyl)phenyl)carbamate (**6r**)

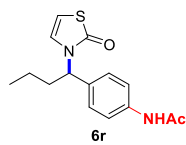

The three-component formal metathesis of 0.3 mmol of *N*-(4-(1-ethoxybutyl)phenyl)acetamide (**1r**, 70.6 mg, 0.3 mmol, 1 equiv), 0.3 mmol of *p*-TsOH-H<sub>2</sub>O (**3a**, 57.1 mg) and 0.45 mmol of 2-methoxythiazole (**2a**, 43 μL, 51.8 mg) afforded 45.9 mg of **6r** (53%) after flash chromatography on silica gel using petroleum ether and ethyl acetate (3:2, *v/v*) as the eluent.

Colorless oil. <sup>1</sup>H NMR (CDCl<sub>3</sub>, 400 MHz): δ = 8.32 (s, 1H), 7.48 (d, *J* = 8.5 Hz, 2H), 7.19 (d, *J* = 8.5 Hz, 2H), 6.57 (d, *J* = 5.5 Hz, 1H), 6.11 (d, *J* = 5.5 Hz, 1H), 5.40 (dd, *J* = 6.8 Hz, 2.6 Hz, 1H), 2.15 (s, 3H), 2.09-1.95 (m, 2H), 1.38-1.29 (m, 2H), 0.96 (t, *J* = 7.4 Hz, 3H) ppm. <sup>13</sup>C NMR (CDCl<sub>3</sub>, 100 MHz): δ = 172.3, 168.9, 138.0, 134.9, 127.5, 121.9, 120.2, 101.6, 56.9, 35.5, 24.3, 19.4, 13.6 ppm. HRMS (ESI) *m/z* calcd for C<sub>15</sub>H<sub>19</sub>N<sub>2</sub>O<sub>2</sub>S [M+H]<sup>+</sup>: 291.1162, found 291.1159.

### 3-(1-(4-Methoxyphenyl)butyl)thiazol-2(3H)-one (**6s**)

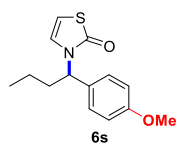

The three-component formal metathesis of 0.3 mmol of 1-(1-ethoxybutyl)-4-methoxybenzene (**1s**, 62.5 mg, 0.3 mmol, 1 equiv), 0.3 mmol of *p*-TsOH-H<sub>2</sub>O (**3a**, 57.1 mg) and 0.45 mmol of 2-methoxythiazole (**2a**, 43 μL, 51.8 mg) afforded 53.9 mg of **6s** (68%) after flash chromatography on silica gel using petroleum ether and ethyl acetate (5:1, *v/v*) as the eluent.

Light yellow oil. <sup>1</sup>H NMR (CDCl<sub>3</sub>, 400 MHz): δ = 7.25 (d, *J* = 8.4 Hz, 2H), 6.87 (d, *J* = 8.7 Hz, 2H), 6.52 (d, *J* = 5.5 Hz, 1H), 6.05 (d, *J* = 5.5 Hz, 1H), 5.43 (dd, *J* = 6.8 Hz, 2.2 Hz, 1H), 3.78 (s, 3H), 2.10-1.95 (m, 2H), 1.40-1.30 (m, 2H), 0.97 (t, *J* = 7.4 Hz, 3H) ppm. <sup>13</sup>C NMR (CDCl<sub>3</sub>, 100 MHz): δ = 171.9, 159.1, 131.4, 128.3, 121.7, 114.0, 101.2, 56.5, 55.1, 35.4, 19.4, 13.6 ppm. HRMS (ESI) *m/z* calcd for C<sub>14</sub>H<sub>18</sub>NO<sub>2</sub>S [M+H]<sup>+</sup>: 264.1053, found 264.1061.

### (*E*)-1-(But-1-en-1-yl)-*N,N*-dimethylaniline (**9t**)

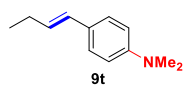

The three-component formal metathesis of 0.3 mmol of 4-(1-ethoxybutyl)-*N,N*-dimethylaniline (**1t**, 62.5 mg, 0.3 mmol, 1 equiv), 0.3 mmol of *p*-TsOH-H<sub>2</sub>O (**3a**, 57.1 mg) and 0.45 mmol of 2-methoxythiazole (**2a**, 43 μL, 51.8 mg) afforded 30.8 mg of **9t** (59%) after flash chromatography on silica gel using petroleum ether and ethyl acetate (15:1, *v/v*) as the eluent, while no thiazol-2(3*H*)-one **6t** could be acquired.

Yellow oil. <sup>1</sup>H NMR (CDCl<sub>3</sub>, 400 MHz): δ = 7.24 (d, *J* = 8.8 Hz, 2H), 6.68 (d, *J* = 8.7 Hz, 2H), 6.29 (d, *J* = 15.8 Hz, 1H), 6.06 (dt, *J* = 15.8 Hz, 6.5 Hz, 1H), 2.93 (s, 3H), 2.19 (quintet, *J* = 7.2

Hz, 2H), 1.07 (t,  $J = 7.5$  Hz, 3H) ppm.  $^{13}\text{C}$  NMR ( $\text{CDCl}_3$ , 100 MHz):  $\delta = 149.6, 128.6, 128.4, 126.7, 126.7, 112.7, 40.7, 26.1, 14.0$  ppm. HRMS (ESI)  $m/z$  calcd for  $\text{C}_{12}\text{H}_{18}\text{N}$   $[\text{M}+\text{H}]^+$ : 176.1434, found 176.1433.

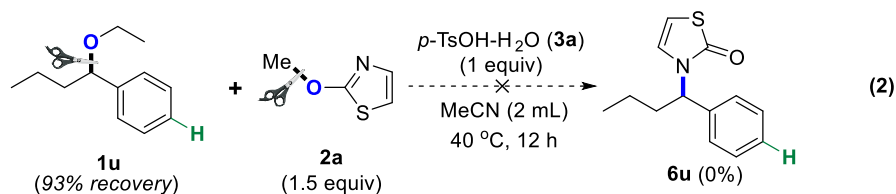

To a reaction tube charged with  $p$ -TsOH- $\text{H}_2\text{O}$  (**3a**, 57.1 mg, 0.3 mmol, 1 equiv) was added a solution of (1-ethoxybutyl)benzene (**1u**, 53.5 mg, 0.3 mmol, 1 equiv) and 2-methoxythiazole (**2a**, 43  $\mu\text{L}$ , 51.8 mg, 0.45 mmol, 1.5 equiv) in anhydrous MeCN (2 mL, 0.15 M of **1u**) via a syringe under argon (1 atm), and the reaction mixture was stirred for 12 hours at 40 °C (oil bath temperature). After quenched with  $\text{Na}_2\text{CO}_3$  (aq.), the mixture was extracted with ethyl acetate. The combined organic phase was concentrated *in vacuo* to give dark residue, which was then purified by flash chromatography using petroleum ether and ethyl acetate as the eluent on silica gel to recover 49.9 mg of **1u** (93%) while no thiazol-2(3H)-one **6u** was generated.

#### (1-Ethoxybutyl)benzene (**1u**)<sup>[1a]</sup>:

Colorless oil.  $^1\text{H}$  NMR ( $\text{CDCl}_3$ , 400 MHz):  $\delta = 7.34$ -7.23 (m, 5H), 4.20 (dd,  $J = 7.5$  Hz, 1.7 Hz, 1H), 3.40-3.26 (m, 2H), 1.84-1.75 (m, 1H), 1.63-1.54 (m, 1H), 1.47-1.38 (m, 1H), 1.32-1.23 (m, 1H), 1.17 (t,  $J = 7.0$  Hz, 3H), 0.90 (t,  $J = 7.4$  Hz, 3H) ppm.  $^{13}\text{C}$  NMR ( $\text{CDCl}_3$ , 100 MHz):  $\delta = 143.3, 128.2, 127.2, 126.5, 81.9, 64.0, 40.5, 19.1, 15.3, 13.9$  ppm.

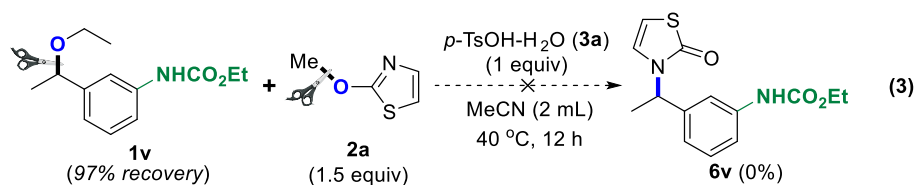

To a reaction tube charged with  $p$ -TsOH- $\text{H}_2\text{O}$  (**3a**, 57.1 mg, 0.3 mmol, 1 equiv) was added a solution of ethyl (3-(1-ethoxyethyl)phenyl)carbamate (**1v**, 71.2 mg, 0.3 mmol, 1 equiv) and 2-methoxythiazole (**2a**, 43  $\mu\text{L}$ , 51.8 mg, 0.45 mmol, 1.5 equiv) in anhydrous MeCN (2 mL, 0.15 M of **1v**) via a syringe under argon (1 atm), and the reaction mixture was stirred for 12 hours at 40

°C (oil bath temperature). After quenched with Na<sub>2</sub>CO<sub>3</sub> (aq.), the mixture was extracted with ethyl acetate. The combined organic phase was concentrated *in vacuo* to give dark residue, which was then purified by flash chromatography using petroleum ether and ethyl acetate as the eluent on silica gel to recover 68.8 mg of **1v** (97%) while no thiazol-2(3*H*)-one **6v** was generated.

**Ethyl (3-(1-ethoxyethyl)phenyl)carbamate (1v):**

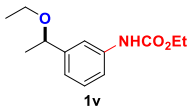 Colorless oil. <sup>1</sup>H NMR (CDCl<sub>3</sub>, 400 MHz): δ = 7.37-7.33 (m, 2H), 7.27 (t, *J* = 7.7 Hz, 1H), 7.02 (d, *J* = 7.5 Hz, 1H), 6.89 (s, 1H), 4.39 (q, *J* = 6.5 Hz, 1H), 4.23 (q, *J* = 7.1 Hz, 2H), 3.36 (q, *J* = 7.1 Hz, 2H), 1.42 (d, *J* = 6.5 Hz, 3H), 1.31 (t, *J* = 7.1 Hz, 3H), 1.18 (t, *J* = 7.0 Hz, 3H) ppm. <sup>13</sup>C NMR (CDCl<sub>3</sub>, 100 MHz): δ = 153.6, 145.3, 138.1, 129.1, 120.9, 117.5, 116.2, 77.6, 63.9, 61.1, 24.1, 15.3, 14.5 ppm. HRMS (ESI) *m/z* calcd for C<sub>13</sub>H<sub>20</sub>NO<sub>3</sub> [M+H]<sup>+</sup>: 238.1438, found 238.1434.

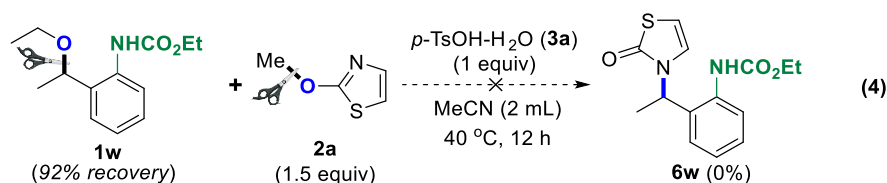

To a reaction tube charged with *p*-TsOH-H<sub>2</sub>O (**3a**, 57.1 mg, 0.3 mmol, 1 equiv) was added a solution of ethyl (2-(1-ethoxyethyl)phenyl)carbamate (**1w**, 71.2 mg, 0.3 mmol, 1 equiv) and 2-methoxythiazole (**2a**, 43 μL, 51.8 mg, 0.45 mmol, 1.5 equiv) in anhydrous MeCN (2 mL, 0.15 M of **1w**) via a syringe under argon (1 atm), and the reaction mixture was stirred for 12 hours at 40 °C (oil bath temperature). After quenched with Na<sub>2</sub>CO<sub>3</sub> (aq.), the mixture was extracted with ethyl acetate. The combined organic phase was concentrated *in vacuo* to give dark residue, which was then purified by flash chromatography using petroleum ether and ethyl acetate as the eluent on silica gel to recover 65.7 mg of **1w** (92%) while no thiazol-2(3*H*)-one **6w** was generated.

**Ethyl (2-(1-ethoxyethyl)phenyl)carbamate (1w):**

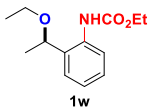 Colorless oil. <sup>1</sup>H NMR (CDCl<sub>3</sub>, 400 MHz): δ = 8.62 (s, 1H), 8.11 (d, *J* = 8.3 Hz, 1H), 7.27 (t, *J* = 7.8 Hz, 1H), 7.03 (d, *J* = 7.5 Hz, 1H), 6.97 (t, *J* = 7.4 Hz, 1H), 4.51 (q, *J* = 6.7 Hz, 1H), 4.22 (q, *J* = 7.1 Hz, 2H), 3.42 (q, *J* = 7.1 Hz, 2H), 1.50 (d, *J* = 6.8 Hz, 3H), 1.31 (t, *J* = 7.1 Hz, 3H), 1.23 (t, *J* = 7.0 Hz, 3H) ppm. <sup>13</sup>C NMR (CDCl<sub>3</sub>, 100 MHz): δ =

153.8, 136.9, 129.3, 128.4, 128.2, 122.6, 119.9, 79.6, 64.2, 60.9, 21.4, 15.2, 14.6 ppm. **HRMS** (ESI)  $m/z$  calcd for  $C_{13}H_{19}NO_3Na$   $[M+Na]^+$ : 260.1257, found 260.1265.

### 3.2 Control Experiments to Support the Proposed Mechanism (Results Shown in Scheme 2)

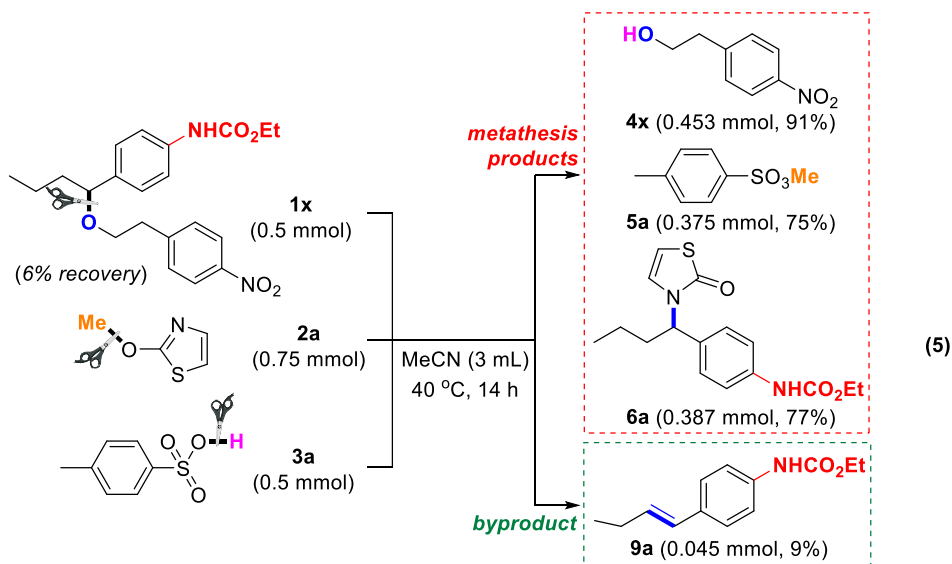

To a reaction tube charged with *p*-TsOH-H<sub>2</sub>O (**3a**, 95.2 mg, 0.5 mmol, 1 equiv) was added a solution of ethyl (4-(1-(4-nitrophenethoxy)butyl)phenyl)carbamate (**1x**, 193.2 mg, 0.5 mmol, 1 equiv) and 2-methoxythiazole (**2a**, 72  $\mu$ L, 86.4 mg, 0.75 mmol, 1.5 equiv) in anhydrous MeCN (3 mL, 0.167 M of **1x**) via a syringe under argon (1 atm), and the reaction mixture was stirred for 14 hours at 40 °C (oil bath temperature). After quenched with Na<sub>2</sub>CO<sub>3</sub> (aq.), the mixture was extracted with ethyl acetate. The combined organic phase was concentrated *in vacuo* to give dark residue, which was then purified by flash chromatography using petroleum ether and ethyl acetate (10:1 to 6:1 to 3:1 to 2:1, v/v) as the eluent on silica gel to recover 11.9 mg of ether **1x** (0.031 mmol, 6%) while obtain 75.7 mg of alcohol **4x** (0.453 mmol, 91%), 69.8 mg of sulfonate **5a** (0.375 mmol, 75%), 124.0 mg of thiazol-2(3*H*)-one **6a** (0.387 mmol, 77%) and 9.8 mg of alkene **9a** (0.045 mmol, 9%). All of the above yields were calculated according to their maximum theoretical yields (0.5 mmol = 100%).

#### Ethyl (4-(1-(4-nitrophenethoxy)butyl)phenyl)carbamate (**1x**):

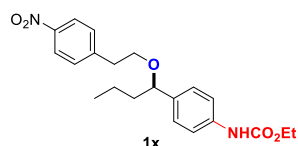

Light brown oil. <sup>1</sup>H NMR (CDCl<sub>3</sub>, 400 MHz):  $\delta$  = 8.11 (d,  $J$  = 8.7 Hz, 2H), 7.33 (d,  $J$  = 8.7 Hz, 4H), 7.12 (d,  $J$  = 8.6 Hz, 2H), 6.85 (s,



1H), 4.22 (q,  $J = 7.1$  Hz, 2H), 4.13 (t,  $J = 7.5$  Hz, 1H), 3.57-3.45 (m, 2H), 2.92 (t,  $J = 6.5$  Hz, 2H), 1.79-1.70 (m, 1H), 1.58-1.49 (m, 1H), 1.38-1.28 (m, 4H), 1.24-1.15 (m, 1H), 0.85 (t,  $J = 7.4$  Hz, 3H) ppm.  $^{13}\text{C}$  NMR ( $\text{CDCl}_3$ , 100 MHz):  $\delta = 153.7, 147.5, 146.4, 137.3, 137.3, 129.7, 127.2, 123.3, 118.6, 81.9, 68.2, 61.1, 40.1, 36.2, 18.8, 14.4, 13.8$  ppm. HRMS (ESI)  $m/z$  calcd for  $\text{C}_{21}\text{H}_{27}\text{N}_2\text{O}_5$   $[\text{M}+\text{H}]^+$ : 387.1915, found 387.1912.

#### 2-(4-Nitrophenyl)ethan-1-ol (4x)<sup>2</sup>:

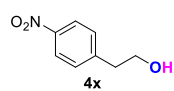

Yellow solid.  $^1\text{H}$  NMR ( $\text{CDCl}_3$ , 400 MHz):  $\delta = 8.14$  (d,  $J = 8.8$  Hz, 2H), 7.40 (d,  $J = 8.8$  Hz, 2H), 3.91 (t,  $J = 6.5$  Hz, 2H), 2.97 (q,  $J = 6.5$  Hz, 2H), 2.23 (s, 1H)

ppm.  $^{13}\text{C}$  NMR ( $\text{CDCl}_3$ , 100 MHz):  $\delta = 146.9, 146.5, 129.8, 123.5, 62.7, 38.7$  ppm.

#### Methyl 4-methylbenzenesulfonate (5a)<sup>3</sup>:

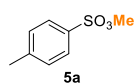

Colorless oil.  $^1\text{H}$  NMR ( $\text{CDCl}_3$ , 400 MHz):  $\delta = 7.79$  (d,  $J = 8.4$  Hz, 2H), 7.36 (d,  $J = 8.4$  Hz, 2H), 3.73 (s, 3H), 2.45 (s, 3H) ppm.  $^{13}\text{C}$  NMR ( $\text{CDCl}_3$ , 100 MHz):  $\delta =$

144.9, 132.0, 129.8, 128.0, 56.1, 21.5 ppm.

#### Ethyl (E)-(4-(but-1-en-1-yl)phenyl)carbamate (9a)<sup>1a</sup>:

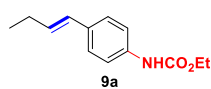

White solid, m.p. 69-70 °C.  $^1\text{H}$  NMR ( $\text{CDCl}_3$ , 400 MHz):  $\delta = 7.32$ -7.25 (m, 4H), 6.72 (s, 1H), 6.31 (dt,  $J = 15.8$  Hz, 1.5 Hz, 1H), 6.17 (dt,  $J = 15.8$  Hz,

6.4 Hz, 1H), 4.21 (q,  $J = 7.1$  Hz, 2H), 2.21 (quint-d,  $J = 7.5$  Hz, 1.5 Hz, 2H), 1.29 (t,  $J = 7.1$  Hz, 3H), 1.07 (t,  $J = 7.5$  Hz, 3H) ppm.  $^{13}\text{C}$  NMR ( $\text{CDCl}_3$ , 100 MHz):  $\delta = 153.6, 136.6, 133.2, 131.5,$

128.0, 126.4, 118.6, 61.1, 26.0, 14.5, 13.6 ppm.

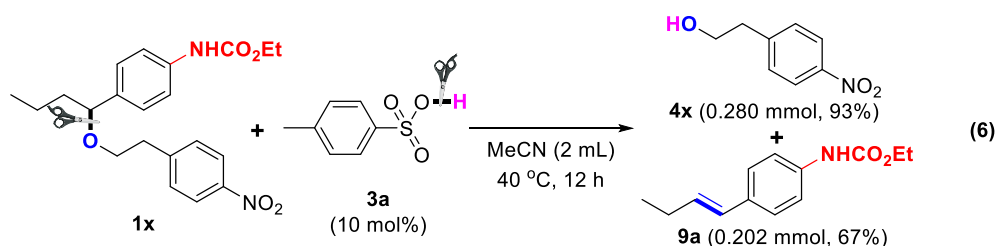

To a reaction tube charged with  $p$ -TsOH- $\text{H}_2\text{O}$  (**3a**, 5.7 mg, 0.03 mmol, 10 mol%) was added a solution of ethyl (4-(1-(4-nitrophenoxy)butyl)phenyl)carbamate (**1x**, 115.9 mg, 0.3 mmol, 1 equiv) in anhydrous MeCN (2 mL, 0.15 M of **1x**) via a syringe under argon (1 atm), and the reaction mixture was stirred for 12 hours at 40 °C (oil bath temperature). After quenched with  $\text{Na}_2\text{CO}_3$  (aq.), the mixture was extracted with ethyl acetate. The combined organic phase was

concentrated *in vacuo* to give dark residue, which was then purified by flash chromatography using petroleum ether and ethyl acetate (10:1 to 6:1 to 3:1, *v/v*) as the eluent on silica gel to afford 46.8 mg of **4x** (0.280 mmol, 93%) and 44.3 mg of **9a** (0.202 mmol, 67%). Both yields were calculated according to their maximum theoretical yields (0.3 mmol = 100%).

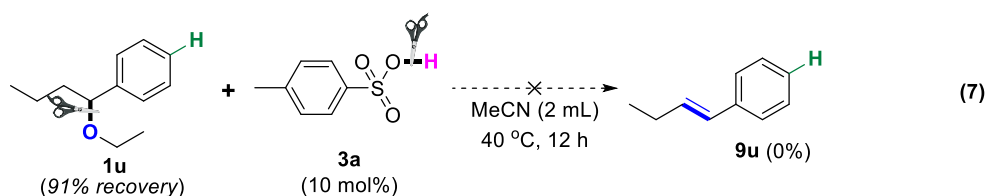

To a reaction tube charged with *p*-TsOH-H<sub>2</sub>O (**3a**, 5.7 mg, 0.03 mmol, 10 mol%) was added a solution of (1-ethoxybutyl)benzene (**1u**, 53.5 mg, 0.3 mmol, 1 equiv) in anhydrous MeCN (2 mL, 0.15 M of **1u**) via a syringe under argon (1 atm), and the reaction mixture was stirred for 12 hours at 40 °C (oil bath temperature). After quenched with Na<sub>2</sub>CO<sub>3</sub> (aq.), the mixture was extracted with ethyl acetate. The combined organic phase was concentrated *in vacuo* to give dark residue, which was then purified by flash chromatography using petroleum ether and ethyl acetate (10:1 to 6:1, *v/v*) as the eluent on silica gel to recover 48.5 mg of **1u** (91%) while no alkene **9a** was generated.

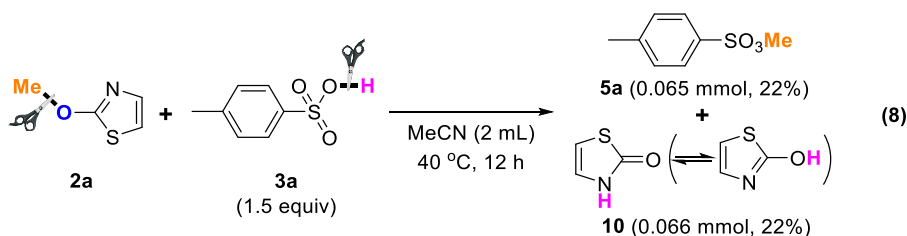

To a reaction tube charged with *p*-TsOH-H<sub>2</sub>O (**3a**, 85.6 mg, 0.45 mmol, 1.5 equiv) was added a solution of 2-methoxythiazole (**2a**, 29 μL, 34.5 mg, 0.3 mmol, 1 equiv) in anhydrous MeCN (2 mL, 0.15 M of **2a**) via a syringe under argon (1 atm), and the reaction mixture was stirred for 12 hours at 40 °C (oil bath temperature). After quenched with Na<sub>2</sub>CO<sub>3</sub> (aq.), the mixture was extracted with ethyl acetate. The combined organic phase was concentrated *in vacuo* to give dark residue, which was then purified by flash chromatography using petroleum ether and ethyl acetate (10:1 to 6:1 to 3:1 to 2:1, *v/v*) as the eluent on silica gel to afford 12.1 mg of **5a** (0.065 mmol, 22%) and 6.7 mg of **10** (0.066 mmol, 22%).

**Thiazol-2(3*H*)-one (10)<sup>4</sup>:**

 Yellow solid. <sup>1</sup>H NMR (DMSO-*d*<sub>6</sub>, 400 MHz): δ = 11.16 (s, 1H), 6.81 (dd, *J* = 5.4 Hz, 2.7 Hz, 1H), 6.34 (dd, *J* = 5.4 Hz, 1.6 Hz, 1H) ppm. <sup>13</sup>C NMR (CDCl<sub>3</sub>, 100 MHz): δ = 176.6, 121.0, 103.7 ppm.

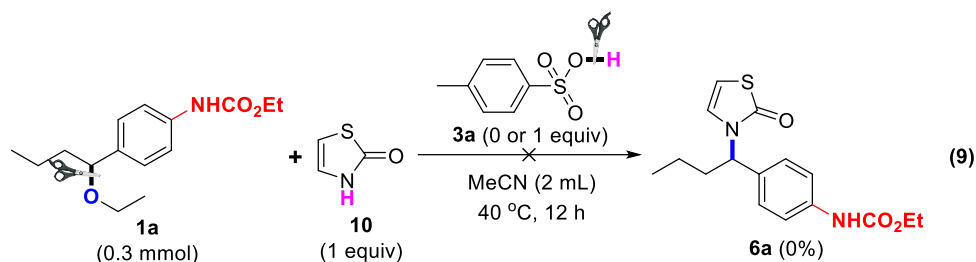

To a reaction tube without any *p*-TsOH-H<sub>2</sub>O was added a solution of ethyl (4-(1-ethoxybutyl)phenyl)carbamate (**1a**, 79.6 mg, 0.3 mmol, 1 equiv) and thiazol-2(3*H*)-one (**10**, 30.3 mg, 0.3 mmol, 1 equiv) in anhydrous MeCN (2 mL, 0.15 M of **1a**) via a syringe under argon (1 atm). Then the reaction mixture was stirred for 12 hours at 40 °C (oil bath temperature), and no thiazol-2(3*H*)-one **6a** could be observed on TLC.

To another reaction tube charged with *p*-TsOH-H<sub>2</sub>O (**3a**, 57.1 mg, 0.3 mmol, 1 equiv) was added a solution of ethyl (4-(1-ethoxybutyl)phenyl)carbamate (**1a**, 79.6 mg, 0.3 mmol, 1 equiv) and thiazol-2(3*H*)-one (**10**, 30.3 mg, 0.3 mmol, 1 equiv) in anhydrous MeCN (2 mL, 0.15 M of **1a**) via a syringe under argon (1 atm). Then the reaction mixture was stirred for 12 hours at 40 °C (oil bath temperature), and no thiazol-2(3*H*)-one **6a** could be observed on TLC, either.

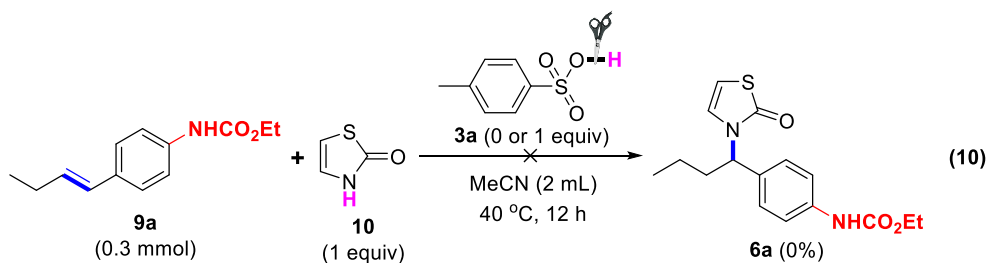

To a reaction tube without any *p*-TsOH-H<sub>2</sub>O was added a solution of ethyl (*E*)-(4-(but-1-en-1-yl)phenyl)carbamate (**9a**, 65.8 mg, 0.3 mmol, 1 equiv) and thiazol-2(3*H*)-one (**10**, 30.3 mg, 0.3 mmol, 1 equiv) in anhydrous MeCN (2 mL, 0.15 M of **9a**) via a syringe under

argon (1 atm). Then the reaction mixture was stirred for 12 hours at 40 °C (oil bath temperature), and no thiazol-2(3*H*)-one **6a** could be observed on TLC.

To another reaction tube charged with *p*-TsOH-H<sub>2</sub>O (**3a**, 57.1 mg, 0.3 mmol, 1 equiv) was added a solution of ethyl (*E*)-(4-(but-1-en-1-yl)phenyl)carbamate (**9a**, 65.8 mg, 0.3 mmol, 1 equiv) and thiazol-2(3*H*)-one (**10**, 30.3 mg, 0.3 mmol, 1 equiv) in anhydrous MeCN (2 mL, 0.15 M of **9a**) via a syringe under argon (1 atm). Then the reaction mixture was stirred for 12 hours at 40 °C (oil bath temperature), and no thiazol-2(3*H*)-one **6a** could be observed on TLC, either.

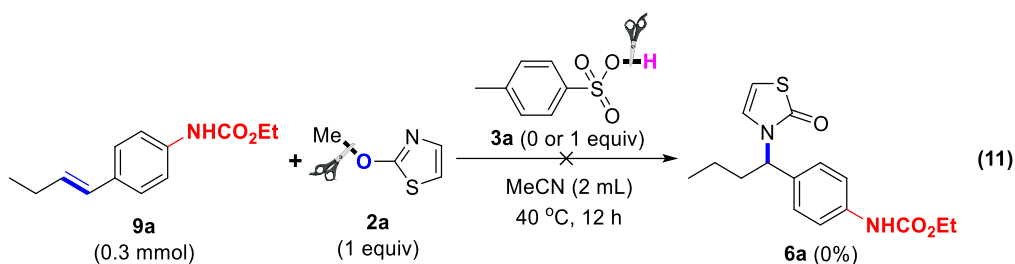

To a reaction tube without any *p*-TsOH-H<sub>2</sub>O was added a solution of ethyl (*E*)-(4-(but-1-en-1-yl)phenyl)carbamate (**9a**, 65.8 mg, 0.3 mmol, 1 equiv) and 2-methoxythiazole (**2a**, 29 μL, 34.5 mg, 0.3 mmol, 1 equiv) in anhydrous MeCN (2 mL, 0.15 M of **9a**) via a syringe under argon (1 atm). Then the reaction mixture was stirred for 12 hours at 40 °C (oil bath temperature), and no thiazol-2(3*H*)-one **6a** could be observed on TLC.

To another reaction tube charged with *p*-TsOH-H<sub>2</sub>O (**3a**, 57.1 mg, 0.3 mmol, 1 equiv) was added a solution of ethyl (*E*)-(4-(but-1-en-1-yl)phenyl)carbamate (**9a**, 65.8 mg, 0.3 mmol, 1 equiv) and 2-methoxythiazole (**2a**, 29 μL, 34.5 mg, 0.3 mmol, 1 equiv) in anhydrous MeCN (2 mL, 0.15 M of **9a**) via a syringe under argon (1 atm). Then the reaction mixture was stirred for 12 hours at 40 °C (oil bath temperature), and no thiazol-2(3*H*)-one **6a** could be observed on TLC, either.

## 4. Crystal Structure of 6a

**Sample Preparation for Crystal Growth:** The compound **6a** was dissolved in a solvent combined by petroleum ether and ethyl acetate (2:1, v/v), and kept for slow evaporation (7 days).

**Crystal Structure of 6a:** The crystal structure of **6a** (CDCC 2330166) with the ellipsoids drawn at the 30% probability level is shown in Figure S1.

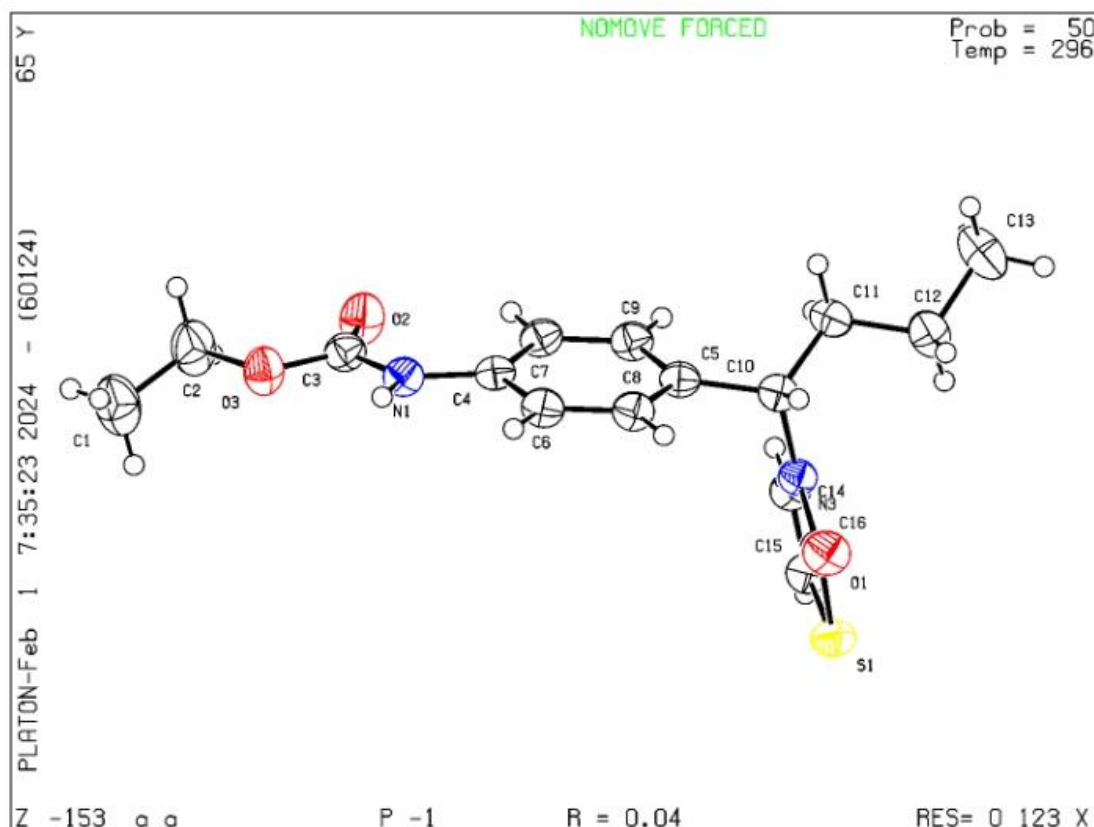

**Figure S1.** Crystal structure of 6a (CDCC 2330166).

**Table S1.** Crystal data and structure refinement for 6a.

|                      |                                                                 |                |
|----------------------|-----------------------------------------------------------------|----------------|
| Identification code  | a_a                                                             |                |
| Empirical formula    | C <sub>16</sub> H <sub>20</sub> N <sub>2</sub> O <sub>3</sub> S |                |
| Formula weight       | 320.40                                                          |                |
| Temperature          | 296(2) K                                                        |                |
| Wavelength           | 0.71073 Å                                                       |                |
| Crystal system       | Triclinic                                                       |                |
| Space group          | P -1                                                            |                |
| Unit cell dimensions | a = 8.3337(6) Å                                                 | α = 89.680(3)° |
|                      | b = 8.9410(6) Å                                                 | β = 75.307(2)° |

|                                         |                                                                    |                              |
|-----------------------------------------|--------------------------------------------------------------------|------------------------------|
|                                         | $c = 11.3827(8) \text{ \AA}$                                       | $\gamma = 81.963(3)^\circ$ . |
| Volume                                  | $811.95(10) \text{ \AA}^3$                                         |                              |
| Z                                       | 2                                                                  |                              |
| Density (calculated)                    | $1.311 \text{ Mg/m}^3$                                             |                              |
| Absorption coefficient                  | $0.213 \text{ mm}^{-1}$                                            |                              |
| F(000)                                  | 340                                                                |                              |
| Theta range for data collection         | $2.302$ to $27.553^\circ$ .                                        |                              |
| Index ranges                            | $-10 \leq h \leq 10$ , $-11 \leq k \leq 10$ , $-14 \leq l \leq 14$ |                              |
| Reflections collected                   | 7501                                                               |                              |
| Independent reflections                 | 3664 [R(int) = 0.0391]                                             |                              |
| Completeness to $\theta = 25.242^\circ$ | 98.1 %                                                             |                              |
| Refinement method                       | Full-matrix least-squares on $F^2$                                 |                              |
| Data / restraints / parameters          | 3664 / 0 / 201                                                     |                              |
| Goodness-of-fit on $F^2$                | 1.028                                                              |                              |
| Final R indices [ $I > 2\sigma(I)$ ]    | R1 = 0.0422, wR2 = 0.1146                                          |                              |
| R indices (all data)                    | R1 = 0.0470, wR2 = 0.1191                                          |                              |
| Extinction coefficient                  | n/a                                                                |                              |
| Largest diff. peak and hole             | 0.235 and $-0.211 \text{ e.\AA}^{-3}$                              |                              |

**Table S2. Atomic coordinates ( $\times 10^4$ ) and equivalent isotropic displacement parameters ( $\text{\AA}^2 \times 10^3$ ) for 6a.  $U(\text{eq})$  is defined as one third of the trace of the orthogonalized  $U^{\text{ij}}$  tensor.**

|       | x       | y        | z       | $U(\text{eq})$ |
|-------|---------|----------|---------|----------------|
| S(1)  | 5662(1) | 2623(1)  | 3609(1) | 42(1)          |
| O(1)  | 8842(1) | 2954(1)  | 2598(1) | 45(1)          |
| O(3)  | 8520(1) | 10530(1) | 8080(1) | 47(1)          |
| O(2)  | 6739(2) | 11100(1) | 6889(1) | 51(1)          |
| N(3)  | 6799(1) | 5032(1)  | 2790(1) | 32(1)          |
| N(1)  | 8917(2) | 9151(1)  | 6408(1) | 36(1)          |
| C(14) | 5080(2) | 5439(2)  | 3262(1) | 35(1)          |
| C(4)  | 8681(2) | 8524(2)  | 5348(1) | 32(1)          |
| C(16) | 7375(2) | 3549(2)  | 2915(1) | 34(1)          |
| C(5)  | 8271(2) | 7028(2)  | 3292(1) | 34(1)          |
| C(6)  | 9784(2) | 7233(2)  | 4828(1) | 37(1)          |
| C(7)  | 7424(2) | 9097(2)  | 4792(1) | 37(1)          |
| C(8)  | 9572(2) | 6501(2)  | 3825(1) | 37(1)          |
| C(10) | 7986(2) | 6100(2)  | 2273(1) | 35(1)          |

|       |         |          |          |       |
|-------|---------|----------|----------|-------|
| C(15) | 4291(2) | 4285(2)  | 3728(1)  | 39(1) |
| C(3)  | 7946(2) | 10332(2) | 7097(1)  | 38(1) |
| C(9)  | 7231(2) | 8354(2)  | 3782(1)  | 38(1) |
| C(11) | 7426(2) | 6995(2)  | 1262(1)  | 40(1) |
| C(12) | 7266(2) | 5990(2)  | 235(2)   | 51(1) |
| C(13) | 7044(3) | 6871(3)  | -875(2)  | 64(1) |
| C(2)  | 7625(3) | 11763(2) | 8908(2)  | 62(1) |
| C(1)  | 7838(3) | 11441(3) | 10130(2) | 71(1) |

---

**Table S3. Bond lengths [Å] and angles [°] for 6a.**

|             |            |
|-------------|------------|
| S(1)-C(15)  | 1.7264(15) |
| S(1)-C(16)  | 1.7597(15) |
| O(1)-C(16)  | 1.2269(17) |
| O(3)-C(3)   | 1.3449(19) |
| O(3)-C(2)   | 1.4437(19) |
| O(2)-C(3)   | 1.2107(18) |
| N(3)-C(16)  | 1.3652(17) |
| N(3)-C(14)  | 1.3931(17) |
| N(3)-C(10)  | 1.4832(17) |
| N(1)-C(3)   | 1.3546(18) |
| N(1)-C(4)   | 1.4027(19) |
| N(1)-H(1)   | 0.8600     |
| C(14)-C(15) | 1.336(2)   |
| C(14)-H(14) | 0.9300     |
| C(4)-C(7)   | 1.394(2)   |
| C(4)-C(6)   | 1.4007(19) |
| C(5)-C(9)   | 1.3936(19) |
| C(5)-C(8)   | 1.398(2)   |
| C(5)-C(10)  | 1.516(2)   |
| C(6)-C(8)   | 1.381(2)   |
| C(6)-H(6)   | 0.9300     |
| C(7)-C(9)   | 1.386(2)   |
| C(7)-H(7)   | 0.9300     |
| C(8)-H(8)   | 0.9300     |
| C(10)-C(11) | 1.529(2)   |
| C(10)-H(10) | 0.9800     |

|                   |            |
|-------------------|------------|
| C(15)-H(15)       | 0.9300     |
| C(9)-H(9)         | 0.9300     |
| C(11)-C(12)       | 1.522(2)   |
| C(11)-H(11A)      | 0.9700     |
| C(11)-H(11B)      | 0.9700     |
| C(12)-C(13)       | 1.522(2)   |
| C(12)-H(12A)      | 0.9700     |
| C(12)-H(12B)      | 0.9700     |
| C(13)-H(13A)      | 0.9600     |
| C(13)-H(13B)      | 0.9600     |
| C(13)-H(13C)      | 0.9600     |
| C(2)-C(1)         | 1.469(3)   |
| C(2)-H(2A)        | 0.9700     |
| C(2)-H(2B)        | 0.9700     |
| C(1)-H(1A)        | 0.9600     |
| C(1)-H(1B)        | 0.9600     |
| C(1)-H(1C)        | 0.9600     |
|                   |            |
| C(15)-S(1)-C(16)  | 91.36(7)   |
| C(3)-O(3)-C(2)    | 116.23(13) |
| C(16)-N(3)-C(14)  | 114.65(12) |
| C(16)-N(3)-C(10)  | 120.47(11) |
| C(14)-N(3)-C(10)  | 124.72(11) |
| C(3)-N(1)-C(4)    | 127.09(12) |
| C(3)-N(1)-H(1)    | 116.5      |
| C(4)-N(1)-H(1)    | 116.5      |
| C(15)-C(14)-N(3)  | 113.45(13) |
| C(15)-C(14)-H(14) | 123.3      |
| N(3)-C(14)-H(14)  | 123.3      |
| C(7)-C(4)-C(6)    | 118.56(14) |
| C(7)-C(4)-N(1)    | 124.27(12) |
| C(6)-C(4)-N(1)    | 117.18(12) |
| O(1)-C(16)-N(3)   | 125.84(14) |
| O(1)-C(16)-S(1)   | 125.41(11) |
| N(3)-C(16)-S(1)   | 108.75(10) |
| C(9)-C(5)-C(8)    | 117.55(14) |
| C(9)-C(5)-C(10)   | 123.06(13) |
| C(8)-C(5)-C(10)   | 119.28(12) |



|                     |            |
|---------------------|------------|
| C(8)-C(6)-C(4)      | 120.54(13) |
| C(8)-C(6)-H(6)      | 119.7      |
| C(4)-C(6)-H(6)      | 119.7      |
| C(9)-C(7)-C(4)      | 120.16(13) |
| C(9)-C(7)-H(7)      | 119.9      |
| C(4)-C(7)-H(7)      | 119.9      |
| C(6)-C(8)-C(5)      | 121.33(13) |
| C(6)-C(8)-H(8)      | 119.3      |
| C(5)-C(8)-H(8)      | 119.3      |
| N(3)-C(10)-C(5)     | 109.49(11) |
| N(3)-C(10)-C(11)    | 110.69(12) |
| C(5)-C(10)-C(11)    | 116.01(12) |
| N(3)-C(10)-H(10)    | 106.7      |
| C(5)-C(10)-H(10)    | 106.7      |
| C(11)-C(10)-H(10)   | 106.7      |
| C(14)-C(15)-S(1)    | 111.75(11) |
| C(14)-C(15)-H(15)   | 124.1      |
| S(1)-C(15)-H(15)    | 124.1      |
| O(2)-C(3)-O(3)      | 124.13(14) |
| O(2)-C(3)-N(1)      | 126.61(15) |
| O(3)-C(3)-N(1)      | 109.26(12) |
| C(7)-C(9)-C(5)      | 121.73(13) |
| C(7)-C(9)-H(9)      | 119.1      |
| C(5)-C(9)-H(9)      | 119.1      |
| C(12)-C(11)-C(10)   | 113.02(13) |
| C(12)-C(11)-H(11A)  | 109.0      |
| C(10)-C(11)-H(11A)  | 109.0      |
| C(12)-C(11)-H(11B)  | 109.0      |
| C(10)-C(11)-H(11B)  | 109.0      |
| H(11A)-C(11)-H(11B) | 107.8      |
| C(11)-C(12)-C(13)   | 112.90(16) |
| C(11)-C(12)-H(12A)  | 109.0      |
| C(13)-C(12)-H(12A)  | 109.0      |
| C(11)-C(12)-H(12B)  | 109.0      |
| C(13)-C(12)-H(12B)  | 109.0      |
| H(12A)-C(12)-H(12B) | 107.8      |
| C(12)-C(13)-H(13A)  | 109.5      |
| C(12)-C(13)-H(13B)  | 109.5      |

|                     |            |
|---------------------|------------|
| H(13A)-C(13)-H(13B) | 109.5      |
| C(12)-C(13)-H(13C)  | 109.5      |
| H(13A)-C(13)-H(13C) | 109.5      |
| H(13B)-C(13)-H(13C) | 109.5      |
| O(3)-C(2)-C(1)      | 109.39(16) |
| O(3)-C(2)-H(2A)     | 109.8      |
| C(1)-C(2)-H(2A)     | 109.8      |
| O(3)-C(2)-H(2B)     | 109.8      |
| C(1)-C(2)-H(2B)     | 109.8      |
| H(2A)-C(2)-H(2B)    | 108.2      |
| C(2)-C(1)-H(1A)     | 109.5      |
| C(2)-C(1)-H(1B)     | 109.5      |
| H(1A)-C(1)-H(1B)    | 109.5      |
| C(2)-C(1)-H(1C)     | 109.5      |
| H(1A)-C(1)-H(1C)    | 109.5      |
| H(1B)-C(1)-H(1C)    | 109.5      |

---

Symmetry transformations used to generate equivalent atoms:

**Table S4. Anisotropic displacement parameters ( $\text{\AA}^2 \times 10^3$ ) for 6a. The anisotropic displacement factor exponent takes the form:  $-2\pi^2[ h^2 a^{*2}U^{11} + \dots + 2 h k a^* b^* U^{12} ]$**

|       | $U^{11}$ | $U^{22}$ | $U^{33}$ | $U^{23}$ | $U^{13}$ | $U^{12}$ |
|-------|----------|----------|----------|----------|----------|----------|
| S(1)  | 45(1)    | 33(1)    | 46(1)    | 7(1)     | -9(1)    | -4(1)    |
| O(1)  | 38(1)    | 41(1)    | 51(1)    | 3(1)     | -12(1)   | 8(1)     |
| O(3)  | 49(1)    | 42(1)    | 46(1)    | -8(1)    | -18(1)   | 9(1)     |
| O(2)  | 50(1)    | 44(1)    | 61(1)    | -9(1)    | -24(1)   | 14(1)    |
| N(3)  | 31(1)    | 30(1)    | 34(1)    | 2(1)     | -8(1)    | 0(1)     |
| N(1)  | 32(1)    | 33(1)    | 41(1)    | 2(1)     | -12(1)   | 1(1)     |
| C(14) | 32(1)    | 34(1)    | 37(1)    | 1(1)     | -8(1)    | 2(1)     |
| C(4)  | 30(1)    | 30(1)    | 38(1)    | 5(1)     | -8(1)    | -4(1)    |
| C(16) | 38(1)    | 32(1)    | 33(1)    | 1(1)     | -11(1)   | 1(1)     |
| C(5)  | 31(1)    | 34(1)    | 37(1)    | 5(1)     | -7(1)    | -5(1)    |
| C(6)  | 31(1)    | 37(1)    | 42(1)    | 5(1)     | -12(1)   | 2(1)     |
| C(7)  | 34(1)    | 30(1)    | 45(1)    | 3(1)     | -11(1)   | 1(1)     |
| C(8)  | 33(1)    | 34(1)    | 40(1)    | 2(1)     | -8(1)    | 2(1)     |
| C(10) | 31(1)    | 35(1)    | 36(1)    | 3(1)     | -6(1)    | -2(1)    |

|       |       |       |       |        |        |        |
|-------|-------|-------|-------|--------|--------|--------|
| C(15) | 35(1) | 40(1) | 40(1) | 2(1)   | -7(1)  | -2(1)  |
| C(3)  | 37(1) | 34(1) | 43(1) | 3(1)   | -12(1) | -2(1)  |
| C(9)  | 34(1) | 35(1) | 44(1) | 5(1)   | -14(1) | -1(1)  |
| C(11) | 42(1) | 42(1) | 37(1) | 9(1)   | -10(1) | -8(1)  |
| C(12) | 58(1) | 58(1) | 40(1) | 2(1)   | -14(1) | -9(1)  |
| C(13) | 62(1) | 90(2) | 40(1) | 12(1)  | -14(1) | -10(1) |
| C(2)  | 76(1) | 52(1) | 52(1) | -14(1) | -19(1) | 16(1)  |
| C(1)  | 83(2) | 73(1) | 53(1) | -13(1) | -21(1) | 12(1)  |

**Table S5. Hydrogen coordinates (  $\times 10^4$ ) and isotropic displacement parameters ( $\text{\AA}^2 \times 10^{-3}$ ) for 6a.**

|        | x     | y     | z     | U(eq) |
|--------|-------|-------|-------|-------|
| H(1)   | 9772  | 8740  | 6647  | 43    |
| H(14)  | 4533  | 6418  | 3252  | 42    |
| H(6)   | 10667 | 6866  | 5161  | 44    |
| H(7)   | 6712  | 9980  | 5100  | 44    |
| H(8)   | 10309 | 5639  | 3497  | 44    |
| H(10)  | 9061  | 5487  | 1892  | 42    |
| H(15)  | 3144  | 4367  | 4075  | 47    |
| H(9)   | 6386  | 8750  | 3422  | 45    |
| H(11A) | 6352  | 7606  | 1606  | 48    |
| H(11B) | 8230  | 7674  | 933   | 48    |
| H(12A) | 6313  | 5456  | 527   | 62    |
| H(12B) | 8262  | 5244  | -2    | 62    |
| H(13A) | 6058  | 7611  | -648  | 96    |
| H(13B) | 6928  | 6189  | -1487 | 96    |
| H(13C) | 8006  | 7370  | -1190 | 96    |
| H(2A)  | 6444  | 11889 | 8925  | 75    |
| H(2B)  | 8054  | 12694 | 8635  | 75    |
| H(1A)  | 7381  | 10535 | 10405 | 107   |
| H(1B)  | 7263  | 12269 | 10678 | 107   |
| H(1C)  | 9009  | 11306 | 10106 | 107   |

## 5. Density Functional Theory (DFT) Calculations

### Computational details

All of the DFT calculations were performed with the Gaussian 09 program package.<sup>5</sup> The geometry optimization of all the minima involved were performed at the B3LYP level of theory<sup>6</sup> with Grimme's dispersion correction with Becke-Johnson Damping (D3-BJ)<sup>7</sup> and def2-SVP basis set for all atoms.<sup>8</sup> The structures of the reactants, intermediates, transition states, and products were fully optimized without any restriction. The vibrational frequencies were computed at the same level to check whether each optimized structure is an energy minimum or a transition state and to evaluate its zero-point vibrational energy (ZPVE) and thermal corrections at 298 K. IRC calculations<sup>9</sup> were used to confirm that the transition states found from the optimization calculations connect the related reactants and products. Single-point solvent calculations were performed at the B3LYP-D3BJ level of theory and def2-TZVP basis set<sup>8</sup> at the optimized geometries for all the intermediates and transition states. Solvation effects were taken into account by applying the SMD<sup>10</sup> solvation model with acetonitrile solvent in both geometry optimization and single-point energy calculations. The reported energies are Gibbs free energies in acetonitrile solution ( $\Delta G_{\text{sol}}$ ). In addition, single-point solvent calculations were also performed at the M06-2X level of theory<sup>11</sup> with Grimme's D3 empirical dispersion correction<sup>12</sup> and def2-TZVP basis set<sup>8</sup> at the optimized geometries for all the intermediates and transition states.

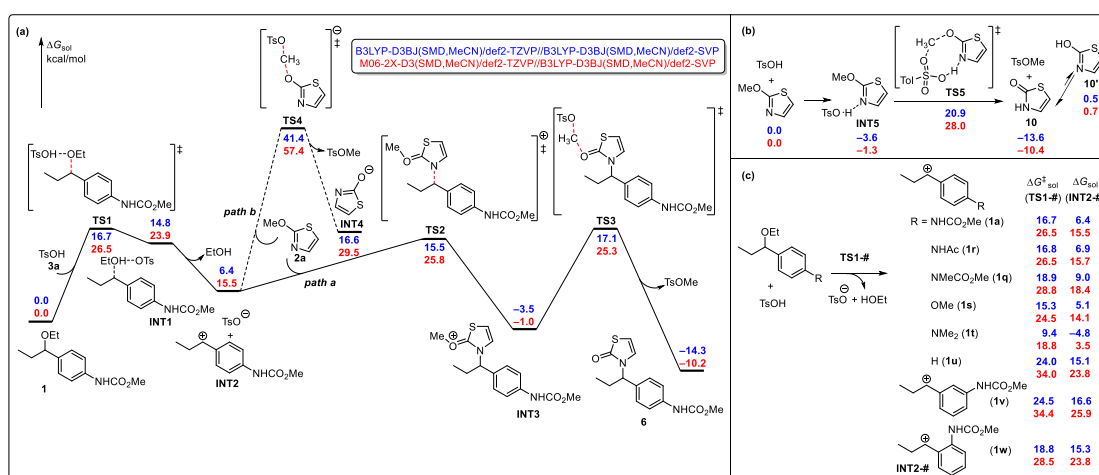

Figure S1 Free energy profiles for the three-component formal metathesis.

## DFT-Computed Energies of All Stationary Points

**Table S6.** Sum of electronic and thermal Free Energies ( $G$ , in Hartree), thermal correction to Gibbs free energy ( $CGFE$ , in Hartree), electronic energy in single-point calculations in acetonitrile at the B3LYP level of theory ( $E_{\text{sol(B3LYP)}}$ , in Hartree), and free energies in acetonitrile at the B3LYP level of theory ( $G_{\text{sol(B3LYP)}}$ , in Hartree), electronic energy in single-point calculations in acetonitrile at the M06-2X level of theory ( $E_{\text{sol(M06-2X)}}$ , in Hartree), and free energies in acetonitrile at the M06-2X level of theory ( $G_{\text{sol(M06-2X)}}$ , in Hartree). For transition state structures, one imaginary frequency (Ifreq) was observed and given below. For all minimum structures, no imaginary frequency was observed.

| Structure         | $G^a$        | $CGFE^a$ | $E_{\text{sol(B3LYP)}}^b$ | $G_{\text{sol(B3LYP)}}^b$ | $E_{\text{sol(M06-2X)}}^c$ | $G_{\text{sol(M06-2X)}}^c$ | Ifreq <sup>a</sup> |
|-------------------|--------------|----------|---------------------------|---------------------------|----------------------------|----------------------------|--------------------|
| <b>1</b>          | -786.527049  | 0.257429 | -787.662933               | -787.405504               | -787.259431                | -787.002002                | --                 |
| TsOH( <b>3a</b> ) | -894.829016  | 0.104223 | -895.702209               | -895.597986               | -895.422746                | -895.318523                | --                 |
| <b>TS1</b>        | -1681.330663 | 0.386321 | -1683.363153              | -1682.976832              | -1682.664567               | -1682.278246               | -57.28             |
| <b>INT1</b>       | -1681.333463 | 0.383833 | -1683.363778              | -1682.979945              | -1682.666242               | -1682.282409               | --                 |
| <b>INT2</b>       | -632.05936   | 0.191706 | -632.953676               | -632.76197                | -632.619646                | -632.42794                 | --                 |
| EtOH              | -154.882109  | 0.05404  | -155.122705               | -155.068665               | -155.03352                 | -154.97948                 | --                 |
| TsO <sup>-</sup>  | -894.375991  | 0.093201 | -895.255839               | -895.162638               | -894.98159                 | -894.888389                | --                 |
| <b>2a</b>         | -683.229084  | 0.057104 | -683.750607               | -683.693503               | -683.580284                | -683.52318                 | --                 |
| <b>TS2</b>        | -1315.27965  | 0.269861 | -1316.710911              | -1316.44105               | -1316.204619               | -1315.934758               | -44.19             |
| <b>INT3</b>       | -1315.313658 | 0.274438 | -1316.745632              | -1316.471194              | -1316.251922               | -1315.977484               | --                 |
| <b>TS3</b>        | -2209.66848  | 0.386715 | -2211.98772               | -2211.601005              | -2211.210698               | -2210.823983               | -551.06            |
| <b>6</b>          | -1275.646373 | 0.236053 | -1276.997765              | -1276.761712              | -1276.532777               | -1276.296724               | --                 |
| TsOMe             | -934.080711  | 0.12923  | -935.018604               | -934.889374               | -934.712986                | -934.583756                | --                 |
| <b>TS4</b>        | -1577.559545 | 0.164236 | -1578.96456               | -1578.800324              | -1578.509004               | -1578.344768               | -548.41            |
| <b>INT4</b>       | -643.519005  | 0.018159 | -643.968673               | -643.950514               | -643.823717                | -643.805558                | --                 |
| <b>INT5</b>       | -1578.067317 | 0.180347 | -1579.477523              | -1579.297176              | -1579.024199               | -1578.843852               | --                 |
| <b>TS5</b>        | -1578.026042 | 0.182732 | -1579.440974              | -1579.258242              | -1578.979874               | -1578.797142               | -553.18            |
| <b>10</b>         | -644.002428  | 0.031518 | -644.455308               | -644.42379                | -644.306072                | -644.274554                | --                 |
| <b>10'</b>        | -643.978824  | 0.031164 | -644.43251                | -644.401346               | -644.287928                | -644.256764                | --                 |
| <b>1r</b>         | -711.36358   | 0.253344 | -712.407063               | -712.153719               | -712.026946                | -711.773602                | --                 |
| <b>TS1-r</b>      | -1606.166765 | 0.381584 | -1608.106547              | -1607.724963              | -1607.431475               | -1607.049891               | -66.69             |
| <b>INT2-r</b>     | -556.895543  | 0.187995 | -557.69737                | -557.509375               | -557.387255                | -557.19926                 | --                 |
| <b>1q</b>         | -825.777833  | 0.283047 | -826.981129               | -826.698082               | -826.553606                | -826.270559                | --                 |
| <b>TS1-q</b>      | -1720.579043 | 0.413307 | -1722.679307              | -1722.266                 | -1721.956524               | -1721.543217               | -56.76             |
| <b>INT2-q</b>     | -671.306377  | 0.218811 | -672.269268               | -672.050457               | -671.910755                | -671.691944                | --                 |
| <b>1s</b>         | -617.936297  | 0.235025 | -618.858055               | -618.62303                | -618.52322                 | -618.288195                | --                 |
| <b>TS1-s</b>      | -1512.740006 | 0.360093 | -1514.556794              | -1514.196701              | -1513.927753               | -1513.56766                | -27.73             |
| <b>INT2-s</b>     | -463.469947  | 0.169077 | -464.150609               | -463.981532               | -463.885444                | -463.716367                | --                 |
| <b>1t</b>         | -637.34325   | 0.271444 | -638.314763               | -638.043319               | -637.955029                | -637.683585                | --                 |
| <b>TS1-t</b>      | -1532.155795 | 0.401311 | -1534.027581              | -1533.62627               | -1533.373384               | -1532.972073               | -168.9             |

|               |              |          |              |              |              |              |        |
|---------------|--------------|----------|--------------|--------------|--------------|--------------|--------|
| <b>INT2-t</b> | -482.892049  | 0.208397 | -483.626004  | -483.417607  | -483.337064  | -483.128667  | --     |
| <b>1u</b>     | -503.520013  | 0.205799 | -504.280456  | -504.074657  | -503.99624   | -503.790441  | --     |
| <b>TS1-u</b>  | -1398.308251 | 0.329324 | -1399.963674 | -1399.63435  | -1399.384069 | -1399.054745 | -15.89 |
| <b>INT2-u</b> | -349.037715  | 0.139539 | -349.556752  | -349.417213  | -349.34263   | -349.203091  | --     |
| <b>1v</b>     | -786.527935  | 0.257022 | -787.663273  | -787.406251  | -787.259899  | -787.002877  | --     |
| <b>TS1-v</b>  | -1681.318902 | 0.383924 | -1683.349045 | -1682.965121 | -1682.650447 | -1682.266523 | -26.71 |
| <b>INT2-v</b> | -632.043619  | 0.190968 | -632.937428  | -632.74646   | -632.60323   | -632.412262  | --     |
| <b>1w</b>     | -786.530237  | 0.258716 | -787.66465   | -787.405934  | -787.260072  | -787.001356  | --     |
| <b>TS1-w</b>  | -1681.328198 | 0.384984 | -1683.358935 | -1682.973951 | -1682.659387 | -1682.274403 | -22.63 |
| <b>INT2-w</b> | -632.046802  | 0.192525 | -632.940741  | -632.748216  | -632.606583  | -632.414058  | --     |

<sup>a</sup> B3LYP-D3(BJ)(SMD, MeCN)/def2-SVP.

<sup>b</sup> B3LYP-D3(BJ)(SMD, MeCN)/def2-TZVP//B3LYP-D3(BJ)(SMD, MeCN)/def2-SVP.

<sup>c</sup> M06-2X-D3(SMD, MeCN)/def2-TZVP//B3LYP-D3(BJ)(SMD, MeCN)/def2-SVP.

### The coordinates of all stationary points (Å)

|          |             |             |             |                 |             |             |             |
|----------|-------------|-------------|-------------|-----------------|-------------|-------------|-------------|
| <b>1</b> |             |             |             | H               | -6.47019500 | 0.96780600  | 0.07212500  |
| C        | 1.24638200  | 0.33255600  | 0.07601500  | O               | 3.53604800  | -0.48235800 | -0.08516300 |
| C        | 0.80078800  | -0.49064400 | -0.96856800 | C               | 3.51496400  | -1.53732700 | 0.85842200  |
| C        | -0.55723100 | -0.72630800 | -1.16561600 | H               | 2.48281300  | -1.91278200 | 0.99921600  |
| C        | -1.51730900 | -0.13774300 | -0.32045100 | H               | 3.85726200  | -1.16438900 | 1.84506500  |
| C        | -1.08138100 | 0.68819400  | 0.73019300  | C               | 4.41622700  | -2.65077400 | 0.36710400  |
| C        | 0.28603600  | 0.90814500  | 0.91507000  | H               | 5.44871100  | -2.28874300 | 0.23491900  |
| H        | 1.53401600  | -0.96095600 | -1.62748500 | H               | 4.42980800  | -3.48044300 | 1.09151800  |
| H        | -0.89018300 | -1.37422700 | -1.98127200 | H               | 4.06162600  | -3.04203300 | -0.60019100 |
| H        | -1.81195200 | 1.14354400  | 1.39425600  |                 |             |             |             |
| H        | 0.61058400  | 1.54735000  | 1.74157300  | <b>TsOH(3a)</b> |             |             |             |
| C        | 2.72550500  | 0.63036600  | 0.25275800  | S               | 1.90026100  | -0.00739300 | -0.12278300 |
| H        | 2.89888000  | 0.90134500  | 1.31399100  | C               | 0.12566800  | -0.00496200 | -0.09162700 |
| C        | 3.17481800  | 1.80628800  | -0.62050200 | C               | -0.55008200 | 1.21750200  | -0.05690000 |
| H        | 2.51907400  | 2.66340600  | -0.39593900 | C               | -0.56341300 | -1.22189100 | -0.08070500 |
| H        | 2.99182200  | 1.53880500  | -1.67596500 | C               | -1.94356400 | 1.21284900  | -0.00404000 |
| C        | 4.63759200  | 2.18628900  | -0.41303900 | H               | 0.00523000  | 2.15658200  | -0.07548400 |
| H        | 5.29752100  | 1.33587700  | -0.64104200 | C               | -1.95532300 | -1.20398200 | -0.02960900 |
| H        | 4.92637600  | 3.02936300  | -1.06115400 | H               | -0.01558200 | -2.16455500 | -0.11844300 |
| H        | 4.82568100  | 2.48579300  | 0.63200700  | C               | -2.66711000 | 0.00851300  | 0.01202500  |
| N        | -2.86600600 | -0.42125100 | -0.58039400 | H               | -2.48176300 | 2.16337700  | 0.02202400  |
| H        | -3.05035300 | -1.03217400 | -1.37116300 | H               | -2.50341500 | -2.14963800 | -0.02412800 |
| C        | -3.97056100 | 0.01934300  | 0.09416600  | O               | 2.38319900  | 1.20085600  | -0.78027900 |
| O        | -3.98832400 | 0.75336500  | 1.06269900  | O               | 2.37592400  | -1.32921100 | -0.53102000 |
| O        | -5.07717300 | -0.49147500 | -0.48405200 | O               | 2.29796300  | 0.21472400  | 1.44763000  |
| C        | -6.32327400 | -0.12254600 | 0.10714400  | H               | 2.17365800  | -0.62567100 | 1.93362100  |
| H        | -7.09984900 | -0.62197300 | -0.48582000 | C               | -4.16993700 | 0.00404300  | 0.06676900  |
| H        | -6.37933800 | -0.45808600 | 1.15406900  | H               | -4.57559900 | 1.02414400  | 0.12135900  |

|            |             |             |             |             |             |             |             |
|------------|-------------|-------------|-------------|-------------|-------------|-------------|-------------|
| H          | -4.59255100 | -0.48941900 | -0.82430200 | H           | 4.56937300  | 1.89972500  | 1.72358900  |
| H          | -4.52827400 | -0.55991700 | 0.94374600  | H           | 3.53708100  | 1.92441600  | 3.18030400  |
| <b>TS1</b> |             |             |             | H           | 3.94018200  | 0.38044100  | 2.40124400  |
| C          | -1.37473100 | -2.10514000 | -0.03218200 | C           | 6.04046200  | -0.70948400 | -0.17588600 |
| C          | -0.97478800 | -1.66172400 | -1.32752700 | H           | 6.36249000  | -1.71162900 | 0.14241400  |
| C          | 0.34852800  | -1.42749600 | -1.60743300 | H           | 6.74746000  | -0.30006700 | -0.90724400 |
| C          | 1.34029900  | -1.61300800 | -0.60993500 | H           | 5.98002100  | -0.04771700 | 0.69993000  |
| C          | 0.96839700  | -2.08024300 | 0.67670900  | C           | -5.21672800 | -2.53360200 | 0.00271900  |
| C          | -0.36260900 | -2.31019800 | 0.94854700  | H           | -6.02062400 | -2.43806200 | -0.74262800 |
| H          | -1.72146600 | -1.47969200 | -2.09709200 | H           | -5.22045600 | -3.57094600 | 0.37389800  |
| H          | 0.64791400  | -1.05160600 | -2.58684200 | H           | -5.45788900 | -1.87311700 | 0.84814300  |
| H          | 1.73108500  | -2.22814400 | 1.43544500  | C           | -3.93457500 | 1.97275800  | 1.90557800  |
| H          | -0.65867400 | -2.64320400 | 1.94593800  | H           | -3.42610900 | 2.45964600  | 1.05819600  |
| C          | -2.72258100 | -2.26484100 | 0.32658200  | H           | -4.88876900 | 2.49487300  | 2.08725200  |
| H          | -2.91566200 | -2.65975600 | 1.32704900  | H           | -3.30368400 | 2.08690800  | 2.80226000  |
| C          | -3.86772900 | -2.18207200 | -0.61434200 | <b>INT1</b> |             |             |             |
| H          | -3.64136500 | -2.86473500 | -1.45520100 | C           | 1.39473600  | 2.19436300  | -0.08493600 |
| N          | 2.63031700  | -1.29907700 | -0.95767500 | C           | 0.98341600  | 1.66734500  | -1.35199000 |
| H          | 2.76087700  | -0.91067800 | -1.88936000 | C           | -0.33541200 | 1.39507900  | -1.59726500 |
| C          | 3.76199900  | -1.30871400 | -0.16054200 | C           | -1.31676400 | 1.61520500  | -0.59179300 |
| O          | 3.83534800  | -1.73411000 | 0.97085800  | C           | -0.93964600 | 2.17741200  | 0.65941600  |
| O          | 4.77584100  | -0.77237600 | -0.84737000 | C           | 0.38492900  | 2.45233500  | 0.89559700  |
| O          | -2.97224500 | -0.19540400 | 1.35677800  | H           | 1.72330000  | 1.45296700  | -2.11938800 |
| S          | -1.29475900 | 1.90571700  | -1.31664900 | H           | -0.64033900 | 0.95015900  | -2.54492400 |
| O          | -0.84168900 | 1.72634200  | -2.71655400 | H           | -1.69655900 | 2.35416000  | 1.41767300  |
| O          | -1.80678700 | 3.26095600  | -0.98934400 | H           | 0.68901000  | 2.85619600  | 1.86388400  |
| O          | -2.26909000 | 0.82768700  | -0.89903200 | C           | 2.73077300  | 2.37808700  | 0.25010900  |
| H          | -2.59177300 | 0.21680700  | 0.52863900  | H           | 2.93291600  | 2.78649800  | 1.24487100  |
| C          | 0.16756400  | 1.68719300  | -0.28137200 | C           | 3.88635200  | 2.13791700  | -0.64401700 |
| C          | 0.04629100  | 1.38067300  | 1.07809900  | H           | 3.75417600  | 2.78684300  | -1.53177900 |
| C          | 1.42799600  | 1.91913000  | -0.83584400 | N           | -2.59463000 | 1.24022700  | -0.89308600 |
| C          | 1.19081900  | 1.30512300  | 1.87146800  | H           | -2.73098900 | 0.79703800  | -1.79984100 |
| H          | -0.93067600 | 1.17434500  | 1.51607500  | C           | -3.72732000 | 1.29708500  | -0.09022200 |
| C          | 2.56646400  | 1.84763100  | -0.02911800 | O           | -3.79552800 | 1.79484400  | 1.00990800  |
| H          | 1.50948100  | 2.14543500  | -1.90018200 | O           | -4.73683000 | 0.71329100  | -0.73868400 |
| C          | 2.46949600  | 1.54155300  | 1.33674500  | O           | 2.97992700  | 0.11912500  | 1.54468000  |
| H          | 1.09149700  | 1.05376700  | 2.93118600  | S           | 1.33397500  | -1.81189200 | -1.33281500 |
| H          | 3.55053700  | 2.02230100  | -0.47154700 | O           | 0.92683100  | -1.55643200 | -2.73660900 |
| H          | -3.87063600 | -1.17753100 | -1.07267100 | O           | 1.82719500  | -3.18808200 | -1.06825000 |
| C          | -4.18670500 | 0.50123000  | 1.60469800  | O           | 2.29322900  | -0.76324800 | -0.82388400 |
| H          | -4.86703600 | 0.41179600  | 0.73691800  | H           | 2.63042900  | -0.20933000 | 0.67697800  |
| H          | -4.67866900 | 0.00824400  | 2.45925400  | C           | -0.16592400 | -1.64620700 | -0.34140000 |
| C          | 3.69520000  | 1.43714400  | 2.20511500  | C           | -0.11535300 | -1.22910500 | 0.99217400  |

|             |             |             |             |   |                  |             |             |
|-------------|-------------|-------------|-------------|---|------------------|-------------|-------------|
| C           | -1.38505600 | -2.02187900 | -0.91186500 | O | 4.16005100       | -0.66846200 | -0.11314100 |
| C           | -1.28912000 | -1.19001300 | 1.74513300  | C | 5.43133000       | -0.00268300 | -0.16908700 |
| H           | 0.82737700  | -0.91059200 | 1.43859500  | H | 6.18360600       | -0.79882300 | -0.21180200 |
| C           | -2.55162600 | -1.98729300 | -0.14437300 | H | 5.49498800       | 0.62962000  | -1.06655800 |
| H           | -1.41585300 | -2.32742100 | -1.95925900 | H | 5.58121900       | 0.61493700  | 0.72829200  |
| C           | -2.52436100 | -1.57608600 | 1.19699500  | C | -3.45339100      | 0.59568000  | 0.27786400  |
| H           | -1.24728100 | -0.84796800 | 2.78308900  | H | -3.67512100      | 1.67019200  | 0.27624100  |
| H           | -3.50365000 | -2.27407500 | -0.59837000 | C | -4.62980700      | -0.29057700 | 0.34149800  |
| H           | 3.79921900  | 1.11111400  | -1.04251900 | C | -5.62676100      | 0.00613700  | -0.79374100 |
| C           | 4.10617000  | -0.69084600 | 1.83402700  | H | -5.12909400      | -0.06340700 | 1.30453000  |
| H           | 4.86461500  | -0.60573700 | 1.03042600  | H | -4.35618500      | -1.35362000 | 0.35632200  |
| H           | 4.56982600  | -0.29076500 | 2.75216900  | H | -6.52341600      | -0.61903200 | -0.66982600 |
| C           | -3.77768800 | -1.52872800 | 2.03017600  | H | -5.93829100      | 1.06233200  | -0.78763700 |
| H           | -4.64948400 | -1.89289100 | 1.46777000  | H | -5.18032000      | -0.21722600 | -1.77476700 |
| H           | -3.67305700 | -2.14621400 | 2.93771400  |   |                  |             |             |
| H           | -3.98820100 | -0.49973000 | 2.36271900  |   | EtOH             |             |             |
| C           | -6.01233900 | 0.72198700  | -0.08269600 | O | -1.15358100      | -0.39751200 | 0.00000200  |
| H           | -6.34117700 | 1.75413700  | 0.10737900  | H | -1.98416200      | 0.09923000  | -0.00001200 |
| H           | -6.70531000 | 0.22573100  | -0.77226900 | C | -0.08844700      | 0.53995600  | 0.00000100  |
| H           | -5.96482100 | 0.17047500  | 0.86628400  | C | 1.22336300       | -0.21899000 | -0.00000100 |
| C           | 5.24289500  | 2.38320500  | 0.00619400  | H | -0.13689800      | 1.20050200  | 0.88963900  |
| H           | 6.05846700  | 2.16993500  | -0.70099900 | H | -0.13689900      | 1.20050400  | -0.88963500 |
| H           | 5.34233900  | 3.43058100  | 0.33345300  | H | 2.07673900       | 0.47774400  | -0.00001400 |
| H           | 5.37832200  | 1.73911300  | 0.88764900  | H | 1.30019300       | -0.86183100 | 0.89234100  |
| C           | 3.73324800  | -2.15599400 | 2.02379900  | H | 1.30017700       | -0.86184700 | -0.89233200 |
| H           | 3.26288800  | -2.55832400 | 1.11222600  |   |                  |             |             |
| H           | 4.62956900  | -2.75860000 | 2.24823500  |   | TsO <sup>-</sup> |             |             |
| H           | 3.02304200  | -2.27381900 | 2.85919100  | S | -1.97630800      | -0.00114400 | 0.00917500  |
|             |             |             |             | C | -0.16424800      | 0.00367700  | -0.05208900 |
|             |             |             |             | C | 0.53537500       | 1.21189000  | -0.04173000 |
|             |             |             |             | C | 0.53914000       | -1.20606900 | -0.04189100 |
|             |             |             |             | C | 1.93349700       | 1.20896500  | -0.01335800 |
|             |             |             |             | H | -0.02304000      | 2.14995600  | -0.06649600 |
|             |             |             |             | C | 1.93387500       | -1.20076300 | -0.01331500 |
|             |             |             |             | H | -0.01742600      | -2.14534800 | -0.06768700 |
|             |             |             |             | C | 2.65655300       | 0.00615500  | 0.00396200  |
|             |             |             |             | H | 2.47516200       | 2.15933500  | -0.00813200 |
|             |             |             |             | H | 2.47778600       | -2.15028000 | -0.00837500 |
|             |             |             |             | O | -2.38980400      | 1.27158000  | -0.64578100 |
|             |             |             |             | O | -2.29623900      | -0.05518800 | 1.46351100  |
|             |             |             |             | O | -2.38448300      | -1.22503300 | -0.73643200 |
|             |             |             |             | C | 4.16307700       | -0.00412000 | 0.03155300  |
|             |             |             |             | H | 4.57256400       | 1.01604300  | 0.06990900  |
|             |             |             |             | H | 4.54181900       | -0.55777100 | 0.90709800  |
| <b>INT2</b> |             |             |             |   |                  |             |             |
| C           | -2.11774800 | 0.24720100  | 0.20885800  |   |                  |             |             |
| C           | -1.65454100 | -1.11509600 | 0.18307400  |   |                  |             |             |
| C           | -0.31942200 | -1.39553100 | 0.11542300  |   |                  |             |             |
| C           | 0.64520500  | -0.33990100 | 0.06735400  |   |                  |             |             |
| C           | 0.21199000  | 1.01832000  | 0.09158300  |   |                  |             |             |
| C           | -1.12893100 | 1.29088500  | 0.15850800  |   |                  |             |             |
| H           | -2.37319500 | -1.93431800 | 0.21543900  |   |                  |             |             |
| H           | 0.03398300  | -2.42853900 | 0.09631600  |   |                  |             |             |
| H           | 0.94690000  | 1.81725100  | 0.05440200  |   |                  |             |             |
| H           | -1.46862200 | 2.32880100  | 0.17547700  |   |                  |             |             |
| N           | 1.95023800  | -0.70745500 | -0.00274100 |   |                  |             |             |
| H           | 2.14115200  | -1.70919400 | -0.02378000 |   |                  |             |             |
| C           | 3.08435100  | 0.11141200  | -0.05218100 |   |                  |             |             |
| O           | 3.08458400  | 1.31822700  | -0.04040500 |   |                  |             |             |



|            |             |             |             |             |             |             |             |
|------------|-------------|-------------|-------------|-------------|-------------|-------------|-------------|
| H          | 4.57465600  | -0.50290700 | -0.86229200 | N           | 3.39478000  | 0.81401700  | 0.26351200  |
|            |             |             |             | H           | 3.79383200  | 1.44942500  | 0.95259800  |
| <b>2a</b>  |             |             |             | C           | -4.40251600 | 2.43928000  | -0.32034000 |
| C          | 0.37761200  | -0.08390100 | -0.00007000 | H           | -4.97723200 | 3.33344500  | -0.03674300 |
| C          | -1.24571400 | 1.40459900  | 0.00007500  | H           | -4.70701700 | 2.14559700  | -1.33768300 |
| C          | -2.03194200 | 0.29003600  | -0.00001400 | H           | -4.66272000 | 1.61826500  | 0.36273900  |
| S          | -1.02938400 | -1.14169800 | 0.00004000  | C           | 4.27479100  | -0.13579400 | -0.24365900 |
| H          | -1.62788600 | 2.42742300  | 0.00011200  | O           | 4.01197400  | -0.98114000 | -1.06713500 |
| H          | -3.11870300 | 0.21724600  | -0.00003700 | O           | 5.46604000  | 0.03846300  | 0.33230500  |
| N          | 0.11799700  | 1.18847200  | -0.00011700 | C           | 6.50774400  | -0.85952400 | -0.07386900 |
| O          | 1.57684100  | -0.64705900 | -0.00011600 | H           | 6.70416700  | -0.76222700 | -1.15175600 |
| C          | 2.70069900  | 0.24196800  | 0.00010900  | H           | 7.39556500  | -0.56777000 | 0.49955400  |
| H          | 3.59193600  | -0.39726700 | 0.00113600  | H           | 6.23356600  | -1.89966200 | 0.15572600  |
| H          | 2.69070600  | 0.87975000  | -0.89717800 |             |             |             |             |
| H          | 2.68945700  | 0.88098400  | 0.89647500  | <b>INT3</b> |             |             |             |
|            |             |             |             | C           | 1.72369700  | 1.15035900  | 0.40604100  |
| <b>TS2</b> |             |             |             | H           | 1.94442600  | 0.92027900  | 1.45482000  |
| C          | -2.04121400 | 1.63818100  | -0.75631600 | O           | 3.50832000  | -0.76736000 | 1.48081700  |
| H          | -2.47727200 | 0.98653300  | -1.52008500 | C           | 4.39366800  | -1.75562600 | 2.05523300  |
| O          | -3.40992300 | -1.48398300 | -0.93036300 | H           | 4.40869800  | -1.55069000 | 3.13076500  |
| C          | -3.26485900 | -2.72758500 | -1.62335900 | H           | 3.99630500  | -2.76422000 | 1.86618000  |
| H          | -3.93448000 | -2.67762500 | -2.48991100 | H           | 5.40311300  | -1.63962400 | 1.63271800  |
| H          | -2.22610300 | -2.86139600 | -1.96679000 | C           | 3.28796200  | -0.77881100 | 0.20156200  |
| H          | -3.56292300 | -3.56825900 | -0.97581700 | C           | 2.35114000  | -0.05671000 | -1.74567500 |
| C          | -2.70474400 | -1.28405200 | 0.17014900  | C           | 3.09847000  | -1.07174700 | -2.23087100 |
| C          | -1.91917900 | -0.16829700 | 1.91537000  | H           | 1.69892800  | 0.61024600  | -2.30499800 |
| C          | -1.19828000 | -1.30968800 | 2.09691200  | H           | 3.19313600  | -1.40805000 | -3.26210700 |
| H          | -1.85904300 | 0.71418300  | 2.55408900  | N           | 2.46289400  | 0.10036200  | -0.36847500 |
| H          | -0.48460700 | -1.55360400 | 2.88254100  | S           | 3.97786900  | -1.87329400 | -0.95219200 |
| N          | -2.76083500 | -0.15837800 | 0.82519000  | C           | 2.31437700  | 2.52487900  | 0.07875500  |
| S          | -1.58574200 | -2.46769200 | 0.84715800  | H           | 2.14553700  | 2.76557400  | -0.98310400 |
| C          | -2.90591300 | 2.72623300  | -0.25748700 | H           | 3.40567700  | 2.45240400  | 0.21280200  |
| H          | -2.66664100 | 3.57791700  | -0.93177500 | C           | 0.23516800  | 0.96779300  | 0.18627200  |
| H          | -2.59276300 | 3.05904500  | 0.74371200  | C           | -0.45004200 | 0.00676900  | 0.94224800  |
| C          | -0.67028200 | 1.47881600  | -0.51909200 | C           | -0.48696700 | 1.69083900  | -0.77405100 |
| C          | 0.03165700  | 0.44051100  | -1.20177800 | C           | -1.80912700 | -0.24221200 | 0.75815500  |
| C          | 0.05643400  | 2.26973400  | 0.42195900  | H           | 0.09429300  | -0.56818400 | 1.69690200  |
| C          | 1.36693100  | 0.19452700  | -0.97637600 | C           | -1.84571300 | 1.45820500  | -0.96840500 |
| H          | -0.51475000 | -0.17771200 | -1.91772900 | H           | 0.00619400  | 2.45056500  | -1.38290100 |
| C          | 1.38942200  | 2.03658400  | 0.65084900  | C           | -2.52544900 | 0.48729400  | -0.20910900 |
| H          | -0.44788200 | 3.06503400  | 0.97183600  | H           | -2.32103500 | -0.99186900 | 1.35611000  |
| C          | 2.07128000  | 0.99247200  | -0.03651200 | H           | -2.39578900 | 2.03303800  | -1.71789100 |
| H          | 1.88540000  | -0.60327200 | -1.50030600 | N           | -3.88786100 | 0.30706900  | -0.46442500 |
| H          | 1.94280600  | 2.64056600  | 1.37320000  | H           | -4.28984900 | 0.89588600  | -1.18876700 |

|            |             |             |             |          |             |             |             |
|------------|-------------|-------------|-------------|----------|-------------|-------------|-------------|
| C          | 1.75569200  | 3.62580600  | 0.97481200  | O        | 7.81431300  | 2.31017900  | 0.32878000  |
| H          | 2.24663400  | 4.58592000  | 0.75281200  | C        | 8.35897100  | 3.37138000  | 1.11482000  |
| H          | 0.67279400  | 3.76102900  | 0.83220000  | H        | 8.53507600  | 3.04483700  | 2.15105800  |
| H          | 1.92870500  | 3.39589300  | 2.03890900  | H        | 9.31173200  | 3.64026000  | 0.64177200  |
| C          | -4.75480800 | -0.56811100 | 0.13562800  | H        | 7.68617000  | 4.24245500  | 1.12218100  |
| O          | -4.49181300 | -1.35775100 | 1.02015600  | S        | -5.33639000 | 0.06056700  | 1.72028700  |
| O          | -5.97689600 | -0.42479100 | -0.41136200 | O        | -5.62210400 | -1.31314800 | 1.23899300  |
| C          | -7.00410600 | -1.27059200 | 0.10936100  | O        | -4.12630000 | 0.09402400  | 2.65565300  |
| H          | -7.16272500 | -1.08330400 | 1.18230700  | O        | -6.47268500 | 0.78880100  | 2.31816800  |
| H          | -7.91400800 | -1.02173600 | -0.45096000 | C        | -2.47261800 | -0.78698600 | 1.83618900  |
| H          | -6.75282900 | -2.33205700 | -0.03706000 | H        | -3.13756200 | -1.40151300 | 1.23486700  |
|            |             |             |             | H        | -2.19880000 | 0.21788900  | 1.53323900  |
|            |             |             |             | H        | -2.21145400 | -1.12550200 | 2.83384000  |
| <b>TS3</b> |             |             |             | C        | -4.79766000 | 0.98827600  | 0.27494200  |
| C          | 1.50268500  | -2.43409100 | -0.12341300 | C        | -5.14721700 | 0.54693800  | -1.00152000 |
| H          | 1.15780300  | -2.53692800 | 0.91287100  | C        | -4.03859100 | 2.15257000  | 0.43843900  |
| O          | -0.91722700 | -1.53447100 | 1.08786000  | C        | -4.72151500 | 1.26733900  | -2.12015900 |
| C          | -0.69008700 | -1.26931300 | -0.11762600 | H        | -5.72853700 | -0.36968800 | -1.11237800 |
| C          | 0.46756300  | -1.25216300 | -2.11749800 | C        | -3.61616800 | 2.86023200  | -0.68557500 |
| C          | -0.60808500 | -0.53658700 | -2.50561600 | H        | -3.76481700 | 2.48800600  | 1.44082200  |
| H          | 1.33162500  | -1.52089300 | -2.72193200 | C        | -3.94191500 | 2.42629500  | -1.98332900 |
| H          | -0.80890700 | -0.10559700 | -3.48490600 | H        | -4.98782300 | 0.91420100  | -3.12003600 |
| N          | 0.42087400  | -1.65876300 | -0.78736800 | H        | -3.01057200 | 3.76165000  | -0.55747900 |
| S          | -1.74702900 | -0.34216700 | -1.18937300 | C        | -3.42616300 | 3.16361500  | -3.18988100 |
| C          | 1.59562200  | -3.83363900 | -0.73880400 | H        | -2.37712200 | 2.88396100  | -3.39247400 |
| H          | 1.90348800  | -3.76279300 | -1.79471300 | H        | -4.01169600 | 2.92606000  | -4.09033000 |
| H          | 0.57858100  | -4.25810300 | -0.73987000 | H        | -3.44498900 | 4.25364400  | -3.03533000 |
| C          | 2.77967100  | -1.61309800 | -0.11241900 |          |             |             |             |
| C          | 2.96369600  | -0.64968500 | 0.88895000  |          |             |             |             |
| C          | 3.77272200  | -1.73827000 | -1.09459400 | <b>6</b> |             |             |             |
| C          | 4.08944100  | 0.17268000  | 0.92412800  | C        | 0.39363800  | 0.77309600  | 0.15672500  |
| H          | 2.20226100  | -0.53511200 | 1.66567700  | C        | -0.01595200 | 0.34996400  | -1.11931600 |
| C          | 4.90465400  | -0.92716400 | -1.07463800 | C        | -1.34617800 | 0.02879600  | -1.37098700 |
| H          | 3.67239200  | -2.47720100 | -1.89178100 | C        | -2.31719000 | 0.12455500  | -0.35541200 |
| C          | 5.07856800  | 0.04024700  | -0.06776900 | C        | -1.91964700 | 0.54961700  | 0.92326100  |
| H          | 4.21114800  | 0.91161100  | 1.71221800  | C        | -0.57895300 | 0.86356600  | 1.16009500  |
| H          | 5.67096000  | -1.03908800 | -1.84628700 | H        | 0.71983600  | 0.25614600  | -1.91863900 |
| N          | 6.24159500  | 0.81642300  | -0.11446900 | H        | -1.64931500 | -0.30242300 | -2.36794200 |
| H          | 6.88206900  | 0.61771100  | -0.87820800 | H        | -2.65661700 | 0.62955500  | 1.71853100  |
| C          | 2.53941500  | -4.75320600 | 0.03009400  | H        | -0.28475100 | 1.19007900  | 2.16157700  |
| H          | 2.53262800  | -5.76511100 | -0.40422200 | C        | 1.83429500  | 1.13402200  | 0.46815300  |
| H          | 3.57702900  | -4.38602300 | 0.00846600  | H        | 1.86682900  | 1.45348300  | 1.51801900  |
| H          | 2.23622400  | -4.83771800 | 1.08670400  | C        | 2.38318500  | 2.29708900  | -0.37102400 |
| C          | 6.62756900  | 1.81850900  | 0.73496800  | H        | 1.70417300  | 3.14767300  | -0.19721400 |
| O          | 6.01989900  | 2.22182600  | 1.70633500  | H        | 2.32025900  | 2.04994600  | -1.43948200 |

|              |             |             |             |             |             |             |             |
|--------------|-------------|-------------|-------------|-------------|-------------|-------------|-------------|
| C            | 3.81194700  | 2.68496600  | -0.00268800 | H           | -3.87812100 | 0.87788400  | 0.97680600  |
| H            | 4.52259100  | 1.87062800  | -0.21632900 |             |             |             |             |
| H            | 4.13683700  | 3.56679100  | -0.57723500 | <b>TS4</b>  |             |             |             |
| H            | 3.89828700  | 2.93059700  | 1.06908400  | S           | -1.03454700 | -0.05288500 | 0.55115500  |
| N            | -3.63405600 | -0.21529000 | -0.69040000 | O           | -0.83865200 | -0.99045800 | 1.67935500  |
| H            | -3.78937400 | -0.50621800 | -1.65159700 | O           | -0.49738100 | -0.63948500 | -0.76689000 |
| C            | -4.74187800 | -0.20758200 | 0.11232400  | O           | -0.54824000 | 1.32835600  | 0.76810900  |
| O            | -4.78692600 | 0.10171300  | 1.28654300  | C           | 1.41837400  | -0.94645800 | -0.67550900 |
| O            | -5.81241800 | -0.60435700 | -0.60477400 | H           | 1.29737500  | -1.73657000 | 0.05708700  |
| C            | -7.05690000 | -0.64927000 | 0.09421100  | H           | 1.40206400  | -1.18929800 | -1.73226600 |
| H            | -7.80255100 | -0.98767500 | -0.63615000 | O           | 3.37570400  | -1.33613000 | -0.66567000 |
| H            | -7.01183500 | -1.35623600 | 0.93671900  | H           | 1.62453700  | 0.06947200  | -0.35346400 |
| H            | -7.33218300 | 0.34597700  | 0.47545700  | C           | 4.10196700  | -0.35343100 | -0.34322700 |
| N            | 2.72044100  | -0.05845900 | 0.43505300  | C           | 4.81719500  | 1.68266900  | 0.25908000  |
| C            | 3.20403900  | -0.61799600 | -0.72815700 | C           | 6.05708100  | 1.11400100  | 0.21685400  |
| C            | 3.09817800  | -0.70568000 | 1.60674100  | H           | 4.64270500  | 2.73032600  | 0.52144900  |
| C            | 3.89633700  | -1.77819100 | 1.43131700  | H           | 7.02198500  | 1.57608200  | 0.42307300  |
| H            | 2.73695200  | -0.31202700 | 2.55584600  | N           | 3.74137800  | 0.88499700  | -0.04722200 |
| H            | 4.31324500  | -2.42412100 | 2.20213800  | S           | 5.91197400  | -0.57157300 | -0.24143500 |
| O            | 3.00708200  | -0.25331300 | -1.87217300 | C           | -2.79486700 | 0.04339600  | 0.22785100  |
| S            | 4.22321800  | -2.04187400 | -0.27209900 | C           | -3.61068800 | -1.04982900 | 0.52279400  |
|              |             |             |             | C           | -3.32997500 | 1.19948300  | -0.34841600 |
| <b>TsOMe</b> |             |             |             | C           | -4.97557200 | -0.98288300 | 0.23315600  |
| S            | -1.55132700 | 0.00875500  | -0.44042600 | H           | -3.17777400 | -1.93987700 | 0.98283000  |
| C            | 0.20376500  | 0.00691900  | -0.21840200 | C           | -4.69393200 | 1.25252900  | -0.63180500 |
| C            | 0.87925800  | -1.21552600 | -0.14204900 | H           | -2.67790700 | 2.04842500  | -0.56139300 |
| C            | 0.87782500  | 1.22519800  | -0.11659500 | C           | -5.53905300 | 0.16423800  | -0.34797400 |
| C            | 2.25875700  | -1.20594800 | 0.04504000  | H           | -5.61704000 | -1.83700900 | 0.46590400  |
| H            | 0.33087900  | -2.15419200 | -0.23423100 | H           | -5.11588000 | 2.15662200  | -1.07966900 |
| C            | 2.26033000  | 1.21196900  | 0.07062700  | C           | -7.01087500 | 0.24297500  | -0.65506600 |
| H            | 0.33010300  | 2.16596800  | -0.18865600 | H           | -7.18166100 | 0.47241900  | -1.71995300 |
| C            | 2.97050300  | 0.00324900  | 0.15577800  | H           | -7.52403700 | -0.70070400 | -0.41967700 |
| H            | 2.79856300  | -2.15449100 | 0.10426200  | H           | -7.49221200 | 1.04806000  | -0.07453700 |
| H            | 2.79937000  | 2.15900800  | 0.15020700  |             |             |             |             |
| O            | -1.98671400 | -1.24127800 | -1.06849600 | <b>INT4</b> |             |             |             |
| O            | -1.99139700 | 1.28155900  | -1.01729700 | C           | -0.95339400 | 0.23799100  | 0.00005600  |
| O            | -1.98913900 | -0.02419800 | 1.13823500  | C           | 1.09949600  | 1.19289800  | 0.00010600  |
| C            | 4.46102800  | -0.01203600 | 0.35377900  | C           | 1.59265800  | -0.08194700 | 0.00036900  |
| H            | 4.73066500  | -0.58585000 | 1.25572400  | S           | 0.26786200  | -1.23124500 | -0.00018800 |
| H            | 4.96303000  | -0.50154000 | -0.49748000 | H           | 1.74865300  | 2.07625700  | -0.00012700 |
| H            | 4.86669200  | 1.00457400  | 0.45495500  | H           | 2.63886500  | -0.38957100 | 0.00052200  |
| C            | -3.40876600 | -0.03101600 | 1.38317300  | N           | -0.25743900 | 1.37981200  | -0.00041100 |
| H            | -3.87537900 | -0.92558200 | 0.94323100  | O           | -2.16297400 | 0.03261200  | 0.00028800  |
| H            | -3.52277500 | -0.05137600 | 2.47437000  |             |             |             |             |

**INT5**

S 0.54971700 -2.01558200 0.06573600  
O 1.26374000 -3.27818700 -0.19361600  
O -0.23182900 -1.93882800 1.32663900  
O -0.31999300 -1.62410700 -1.13415900  
O -3.69996900 -0.45653500 0.37700300  
C -2.92345900 0.50403400 -0.02592100  
C -1.17710400 1.62242500 -0.93962600  
C -1.91680900 2.68647100 -0.54905900  
H -0.20843800 1.63789800 -1.43618200  
H -1.69307300 3.74629000 -0.65996900  
N -1.75779500 0.39833600 -0.64204000  
S -3.39478900 2.15849900 0.22372700  
H -1.18345700 -0.55050900 -0.85577200  
C 1.77844800 -0.71006100 0.15394600  
C 1.51824800 0.43554200 0.90805600  
C 2.95466200 -0.81787000 -0.59476800  
C 2.44248000 1.48335200 0.90526700  
H 0.59992100 0.50198200 1.49356700  
C 3.86870600 0.23464100 -0.58777200  
H 3.14744100 -1.72417400 -1.17176500  
C 3.62841300 1.40290600 0.15863200  
H 2.23839200 2.38089100 1.49511300  
H 4.78965300 0.15132400 -1.17163100  
C 4.63203500 2.52492100 0.16127100  
H 4.89716000 2.82340600 -0.86610700  
H 4.24851300 3.40903000 0.69093100  
H 5.56849200 2.21309700 0.65455600  
C -3.30487800 -1.83283500 0.14405400  
H -2.36682500 -2.04231800 0.67707700  
H -4.12883400 -2.43809200 0.53675700  
H -3.18326900 -2.00375000 -0.93510000

**TS5**

S -1.03993500 -1.81840300 0.38146200  
O -1.85279000 -2.86777500 1.01378200  
O -0.64980800 -2.20249300 -1.04828400  
O 0.16117900 -1.38170000 1.16399300  
C 1.09528400 -1.31830500 -1.53607300  
H 1.50918400 -1.94913500 -0.76287600  
H 1.08191800 -1.68689300 -2.55974200  
O 2.77988300 -0.39580300 -1.68902100  
H 0.61534800 -0.37011900 -1.33075500  
C 3.10204400 0.16065400 -0.61613700

C 3.05021500 0.82788400 1.60403800  
C 4.17620300 1.47486200 1.23613800  
H 2.58253700 0.82044200 2.58752100  
H 4.81987800 2.10273600 1.84956300  
N 2.46078900 0.10483800 0.57713900  
S 4.53685300 1.18596800 -0.45718800  
H 1.59543000 -0.45311300 0.74120400  
C -2.07352300 -0.36481400 0.20501800  
C -1.51799900 0.91336000 0.28630000  
C -3.43609100 -0.53410100 -0.06565700  
C -2.33649100 2.02932500 0.09164700  
H -0.45753600 1.04059700 0.50922100  
C -4.23925800 0.58806900 -0.25700300  
H -3.85980600 -1.53875800 -0.11582700  
C -3.70518800 1.88789900 -0.18231600  
H -1.90226000 3.03013700 0.15933300  
H -5.30481700 0.45674100 -0.46457500  
C -4.59196800 3.08798900 -0.37890200  
H -5.35490600 3.14659200 0.41581400  
H -4.01442600 4.02358600 -0.36632200  
H -5.13382800 3.02753000 -1.33700000

**10**

C 0.94399200 0.12977400 -0.00019500  
C -1.17636800 1.15408700 0.00004200  
C -1.60136300 -0.12709300 -0.00004500  
S -0.24239600 -1.24490800 0.00016100  
H -1.79434800 2.05123900 0.00011500  
H -2.63009500 -0.48326700 -0.00002300  
N 0.20223600 1.28585400 -0.00005900  
O 2.15191600 0.02762100 -0.00012800  
H 0.67423200 2.18800400 -0.00004800

**10'**

C 0.79403600 0.18315600 0.00003800  
C -1.16383700 1.18911600 0.00006400  
C -1.62618900 -0.09421900 0.00012300  
S -0.27789100 -1.20678000 -0.00012600  
H -1.80274700 2.07444100 0.00010000  
H -2.65397900 -0.45478600 0.00019100  
N 0.20866300 1.34020900 -0.00000100  
O 2.10842800 -0.02573500 0.00003500  
H 2.55085800 0.84492400 0.00010400

|              |             |             |             |             |             |             |             |
|--------------|-------------|-------------|-------------|-------------|-------------|-------------|-------------|
| <b>Ir</b>    |             |             | H           | -1.49652400 | -1.33778200 | -2.15220400 |             |
| C            | -0.83084500 | -0.33407100 | 0.07990200  | H           | 0.89745300  | -0.98334700 | -2.57436200 |
| C            | -0.37106300 | 0.50604400  | -0.94506800 | H           | 1.85492300  | -2.47225600 | 1.37467000  |
| C            | 0.99012100  | 0.73866400  | -1.12313200 | H           | -0.56143900 | -2.81950400 | 1.81750900  |
| C            | 1.93996500  | 0.13094300  | -0.27906400 | C           | -2.57489400 | -2.23634500 | 0.20164200  |
| C            | 1.48829100  | -0.71324400 | 0.75143500  | H           | -2.79979700 | -2.69165400 | 1.16950800  |
| C            | 0.11807400  | -0.92975200 | 0.91806400  | C           | -3.70119700 | -2.03053000 | -0.74223500 |
| H            | -1.09556600 | 0.99130600  | -1.60280300 | H           | -3.49208400 | -2.65612000 | -1.63070300 |
| H            | 1.33340500  | 1.40001900  | -1.92381700 | N           | 2.84190700  | -1.42231900 | -0.92724800 |
| H            | 2.21344500  | -1.18244000 | 1.41081200  | C           | 3.97560400  | -1.54657300 | -0.13065500 |
| H            | -0.21847200 | -1.58236400 | 1.72923900  | O           | 3.95220900  | -2.02981600 | 0.98697800  |
| C            | -2.31278500 | -0.62924600 | 0.23710000  | O           | -2.72958000 | -0.23322200 | 1.37666200  |
| H            | -2.49872100 | -0.90848300 | 1.29406200  | S           | -1.08505900 | 2.00815700  | -1.18974400 |
| C            | -2.75458400 | -1.79745200 | -0.65039600 | O           | -0.70622400 | 1.97244600  | -2.62183700 |
| H            | -2.10206200 | -2.65715700 | -0.42647200 | O           | -1.57601500 | 3.32258600  | -0.70201500 |
| H            | -2.56100400 | -1.52134100 | -1.70173000 | O           | -2.03742300 | 0.88928800  | -0.83308400 |
| C            | -4.21971200 | -2.17748800 | -0.46013300 | H           | -2.35878600 | 0.22053200  | 0.56563700  |
| H            | -4.87665400 | -1.32462200 | -0.68765000 | C           | 0.42973400  | 1.69237300  | -0.26077100 |
| H            | -4.50313000 | -3.01508900 | -1.11763100 | C           | 0.38646700  | 1.21274600  | 1.05213600  |
| H            | -4.41799800 | -2.48505800 | 0.58067300  | C           | 1.65379900  | 2.03204200  | -0.84157900 |
| N            | 3.29414700  | 0.41353600  | -0.51810400 | C           | 1.57223900  | 1.07583900  | 1.77419300  |
| C            | 4.40472500  | -0.03436000 | 0.15132200  | H           | -0.56191800 | 0.92439600  | 1.50726900  |
| O            | 4.36485400  | -0.81036900 | 1.09719300  | C           | 2.83295300  | 1.90097700  | -0.10400000 |
| O            | -3.11707600 | 0.48780800  | -0.10077500 | H           | 1.67451000  | 2.39316400  | -1.87112900 |
| C            | -3.10581600 | 1.53451800  | 0.85227200  | C           | 2.81454800  | 1.42515700  | 1.21601900  |
| H            | -2.07520900 | 1.90875500  | 1.00682000  | H           | 1.53424500  | 0.68804100  | 2.79599700  |
| H            | -3.45797300 | 1.15282800  | 1.83204000  | H           | 3.78671200  | 2.17404300  | -0.56318300 |
| C            | -4.00224400 | 2.65205700  | 0.36152000  | H           | -3.65124700 | -0.99484500 | -1.12192700 |
| H            | -5.03333300 | 2.29118800  | 0.21606400  | C           | -3.91548200 | 0.47900600  | 1.70541300  |
| H            | -4.02306700 | 3.47560500  | 1.09268800  | H           | -4.61695600 | 0.47500100  | 0.84986300  |
| H            | -3.63820200 | 3.05151800  | -0.59889700 | H           | -4.40401000 | -0.06222800 | 2.53235900  |
| C            | 5.70841700  | 0.54571500  | -0.35670600 | C           | 4.08335000  | 1.26769400  | 2.01182700  |
| H            | 5.65678000  | 0.86313800  | -1.40812600 | H           | 4.93950200  | 1.73279400  | 1.50187600  |
| H            | 5.97021500  | 1.42385200  | 0.25766000  | H           | 3.98604900  | 1.72507900  | 3.00979100  |
| H            | 6.50365200  | -0.20183000 | -0.23127400 | H           | 4.31708100  | 0.20159100  | 2.16495700  |
| H            | 3.46737700  | 1.05193900  | -1.28897000 | C           | -5.07321900 | -2.36679300 | -0.16903000 |
|              |             |             |             | H           | -5.86123100 | -2.17965600 | -0.91396800 |
| <b>TS1-r</b> |             |             |             | H           | -5.12805200 | -3.42791300 | 0.12251900  |
| C            | -1.21557300 | -2.11471500 | -0.12876700 | H           | -5.29779600 | -1.76161400 | 0.72131000  |
| C            | -0.77294700 | -1.60266200 | -1.38441000 | C           | -3.60950500 | 1.91516100  | 2.10853200  |
| C            | 0.56487200  | -1.40678800 | -1.62486000 | H           | -3.10696200 | 2.44984200  | 1.28668400  |
| C            | 1.53027500  | -1.70138500 | -0.62634900 | H           | -4.54183700 | 2.45020900  | 2.35487500  |
| C            | 1.11240100  | -2.24065300 | 0.61787700  | H           | -2.95307700 | 1.94200300  | 2.99378300  |
| C            | -0.23202600 | -2.43132000 | 0.85096200  | H           | 2.99341200  | -1.00122600 | -1.84101600 |

|   |            |             |             |   |            |             |             |
|---|------------|-------------|-------------|---|------------|-------------|-------------|
| C | 5.22250300 | -0.99217500 | -0.76930500 | H | 0.85872900 | -1.50254000 | -1.92670600 |
| H | 5.30495200 | -1.29101800 | -1.82535000 | C | 2.91570900 | -0.52282400 | -0.39926100 |
| H | 5.18366100 | 0.10895000  | -0.73292900 | H | 3.08566900 | -0.58919800 | -1.49295200 |
| H | 6.09965500 | -1.33735400 | -0.20866800 | C | 3.48129700 | -1.79010300 | 0.25062800  |

**INT2-r**

|   |             |             |             |
|---|-------------|-------------|-------------|
| C | 1.67012400  | 0.24764300  | -0.21410400 |
| C | 1.18778500  | -1.10821200 | -0.19278200 |
| C | -0.15089200 | -1.36933400 | -0.11874500 |
| C | -1.10233100 | -0.30142200 | -0.05726000 |
| C | -0.64796600 | 1.05092700  | -0.07786900 |
| C | 0.69631800  | 1.30469300  | -0.15298900 |
| H | 1.89486800  | -1.93714700 | -0.23331800 |
| H | -0.51745000 | -2.39786200 | -0.10198600 |
| H | -1.37240200 | 1.85806500  | -0.03176100 |
| H | 1.05078500  | 2.33776500  | -0.16777600 |
| N | -2.41313400 | -0.64967800 | 0.02212300  |
| C | -3.55653000 | 0.17046300  | 0.10169000  |
| O | -3.49255400 | 1.38038800  | 0.09943200  |
| C | 3.01004000  | 0.57813100  | -0.28721000 |
| H | 3.24624100  | 1.64950800  | -0.28247000 |
| C | 4.17415000  | -0.32401900 | -0.35667000 |
| C | 5.17534900  | -0.04621500 | 0.77970800  |
| H | 4.67627100  | -0.09980200 | -1.31882800 |
| H | 3.88536900  | -1.38298100 | -0.37569200 |
| H | 6.06281800  | -0.68393000 | 0.65359000  |
| H | 5.50222800  | 1.00534500  | 0.77753400  |
| H | 4.72563900  | -0.26658500 | 1.75993200  |
| H | -2.59891600 | -1.65235000 | 0.02916500  |
| C | -4.83543600 | -0.61503700 | 0.19187000  |
| H | -5.68415000 | 0.07805600  | 0.22777200  |
| H | -4.93413200 | -1.28512700 | -0.67749500 |
| H | -4.82846100 | -1.24401800 | 1.09717000  |

**1q**

|   |             |             |             |
|---|-------------|-------------|-------------|
| C | 1.42052000  | -0.39395400 | -0.15905000 |
| C | 0.92961000  | 0.26499000  | 0.97439700  |
| C | -0.44183000 | 0.34111900  | 1.22421500  |
| C | -1.36056900 | -0.25717800 | 0.34664100  |
| C | -0.87353500 | -0.92720300 | -0.78811700 |
| C | 0.49785100  | -0.98136100 | -1.03521100 |
| H | 1.63407600  | 0.73962100  | 1.66068500  |
| H | -0.79782500 | 0.87837500  | 2.10462500  |
| H | -1.57127800 | -1.39841300 | -1.47810200 |

|   |             |             |             |
|---|-------------|-------------|-------------|
| H | 2.89160000  | -2.64812600 | -0.11114700 |
| H | 3.30490800  | -1.72341900 | 1.33844800  |
| C | 4.96410400  | -2.00302800 | -0.03725600 |
| H | 5.55757500  | -1.14987800 | 0.32425400  |
| H | 5.33850500  | -2.91542600 | 0.45413100  |
| H | 5.14800100  | -2.10458000 | -1.12031200 |
| N | -2.75247600 | -0.20375800 | 0.63546200  |
| C | -3.65406100 | 0.08723800  | -0.36287400 |
| O | -3.38659500 | 0.24790100  | -1.53851600 |
| O | -4.90618200 | 0.18405200  | 0.12802800  |
| C | -5.93188700 | 0.46701200  | -0.82354000 |
| H | -6.86944700 | 0.50720800  | -0.25468100 |
| H | -5.75410300 | 1.43258600  | -1.32077500 |
| H | -5.99105800 | -0.32269300 | -1.58791200 |
| O | 3.63614800  | 0.57973600  | 0.12155400  |
| C | 3.52483200  | 1.77085600  | -0.63641600 |
| H | 2.46392800  | 2.07216600  | -0.73394400 |
| H | 3.90451600  | 1.59726400  | -1.66356900 |
| C | 4.31958600  | 2.86244000  | 0.04916100  |
| H | 5.37886100  | 2.57378200  | 0.14476900  |
| H | 4.26610500  | 3.79698600  | -0.53134900 |
| H | 3.92348400  | 3.05921600  | 1.05853900  |
| C | -3.18568100 | -0.26612100 | 2.03201100  |
| H | -3.30452900 | 0.73531000  | 2.47814700  |
| H | -4.14471700 | -0.79231100 | 2.10013400  |
| H | -2.43830800 | -0.82442100 | 2.60898500  |

**TS1-q**

|   |             |             |             |
|---|-------------|-------------|-------------|
| C | -1.37581500 | -2.07433400 | 0.12607500  |
| C | -0.97120900 | -1.70810600 | -1.18801900 |
| C | 0.34832000  | -1.45729400 | -1.48098700 |
| C | 1.35790500  | -1.55295300 | -0.48099200 |
| C | 0.96190000  | -1.92148700 | 0.83748500  |
| C | -0.36292700 | -2.16494800 | 1.12135400  |
| H | -1.71263900 | -1.59244200 | -1.97529000 |
| H | 0.59285600  | -1.13139600 | -2.48636800 |
| H | 1.70755500  | -2.00541400 | 1.61827700  |
| H | -0.65010900 | -2.43041600 | 2.14140300  |
| C | -2.71915300 | -2.27708500 | 0.47723800  |
| H | -2.90926700 | -2.60731100 | 1.50154200  |

|   |             |             |             |               |             |             |             |
|---|-------------|-------------|-------------|---------------|-------------|-------------|-------------|
| C | -3.85165200 | -2.31487300 | -0.48127400 | H             | 2.52097900  | 0.00360400  | -2.53766500 |
| H | -3.57905500 | -3.03632700 | -1.27448900 | H             | 4.03871200  | -0.92212500 | -2.39381200 |
| N | 2.67033100  | -1.26485900 | -0.83660300 |               |             |             |             |
| C | 3.71017200  | -1.17568800 | 0.10199900  | <b>INT2-q</b> |             |             |             |
| O | 3.67614900  | -1.59486300 | 1.23833600  | C             | -2.26484900 | -0.36793700 | -0.14200800 |
| O | 4.77417500  | -0.55808400 | -0.41761800 | C             | -1.80448900 | 0.97775200  | -0.33788400 |
| O | -3.11920200 | -0.14642300 | 1.36268000  | C             | -0.47373800 | 1.28790800  | -0.26347600 |
| S | -1.44554600 | 1.82803700  | -1.39131200 | C             | 0.50896400  | 0.27498100  | -0.01371000 |
| O | -0.93539700 | 1.58178300  | -2.76144400 | C             | 0.06379800  | -1.07077200 | 0.18673100  |
| O | -2.00472700 | 3.18473600  | -1.16219800 | C             | -1.27031800 | -1.36929800 | 0.13159200  |
| O | -2.40623100 | 0.74826600  | -0.94693700 | H             | -2.52057700 | 1.77023400  | -0.55576300 |
| H | -2.74262200 | 0.22316400  | 0.51311300  | H             | -0.16701500 | 2.31765800  | -0.42696900 |
| C | -0.01878200 | 1.70691900  | -0.29335300 | H             | 0.78199000  | -1.85435300 | 0.40032000  |
| C | -0.18365200 | 1.48526000  | 1.07787900  | H             | -1.60014700 | -2.39505900 | 0.31093700  |
| C | 1.25693000  | 1.92022200  | -0.81831200 | N             | 1.82939900  | 0.63944700  | 0.06577900  |
| C | 0.93336400  | 1.47336000  | 1.91228800  | C             | 2.87186700  | -0.31435900 | -0.06501900 |
| H | -1.17217600 | 1.29329700  | 1.49526300  | O             | 2.71775500  | -1.44771300 | -0.45178300 |
| C | 2.36853300  | 1.90746300  | 0.02794600  | O             | 4.04388000  | 0.20960200  | 0.27244100  |
| H | 1.37152300  | 2.08437000  | -1.89070100 | C             | 5.18856800  | -0.64718000 | 0.13264600  |
| C | 2.22743700  | 1.68690700  | 1.40616700  | H             | 6.04867600  | -0.04676300 | 0.45057900  |
| H | 0.80028500  | 1.28872500  | 2.98200900  | H             | 5.08315600  | -1.53465200 | 0.77268200  |
| H | 3.36582600  | 2.06054200  | -0.39190100 | H             | 5.30717900  | -0.96004400 | -0.91467700 |
| H | -3.89668200 | -1.34219300 | -1.00206400 | C             | -3.59675800 | -0.73368200 | -0.19258400 |
| C | -4.37581800 | 0.49603500  | 1.53224300  | H             | -3.81644800 | -1.79261100 | -0.00689600 |
| H | -5.02829200 | 0.30560500  | 0.65905600  | C             | -4.77206700 | 0.12004000  | -0.44720000 |
| H | -4.86233700 | 0.03910800  | 2.40975300  | C             | -5.78161300 | 0.05198500  | 0.71427700  |
| C | 3.42195500  | 1.65186100  | 2.32174200  | H             | -5.26126800 | -0.29334600 | -1.35102700 |
| H | 4.32075300  | 2.04589000  | 1.82543200  | H             | -4.49684100 | 1.16007400  | -0.66594700 |
| H | 3.24242000  | 2.24182500  | 3.23469300  | H             | -6.67792500 | 0.63668200  | 0.45918500  |
| H | 3.63727200  | 0.61794500  | 2.63715500  | H             | -6.09108100 | -0.98553100 | 0.91530600  |
| C | 5.94454300  | -0.49559300 | 0.40823100  | H             | -5.34582100 | 0.46754700  | 1.63569800  |
| H | 6.27476600  | -1.50660300 | 0.68768200  | C             | 2.17466800  | 2.06801400  | 0.18108700  |
| H | 6.71078500  | -0.00214300 | -0.20137300 | H             | 3.21191000  | 2.15839000  | 0.50550100  |
| H | 5.74907400  | 0.09037600  | 1.31609100  | H             | 2.05449000  | 2.57320400  | -0.78872800 |
| C | -5.19092700 | -2.69396500 | 0.14055600  | H             | 1.52665500  | 2.54262000  | 0.92737000  |
| H | -5.98766100 | -2.68364200 | -0.61838300 |               |             |             |             |
| H | -5.14969700 | -3.70574000 | 0.57468700  | <b>1s</b>     |             |             |             |
| H | -5.47587400 | -1.99606300 | 0.94101400  | C             | 0.11456000  | -0.32523700 | -0.12348000 |
| C | -4.21297300 | 1.99752800  | 1.73005800  | C             | -0.33921500 | 0.43567700  | 0.96724700  |
| H | -3.70471100 | 2.44902100  | 0.86316500  | C             | -1.69543500 | 0.68362800  | 1.15430400  |
| H | -5.19863700 | 2.47806400  | 1.84696900  | C             | -2.64343500 | 0.16863300  | 0.25072400  |
| H | -3.61659100 | 2.21153400  | 2.63209200  | C             | -2.20479900 | -0.59330200 | -0.84317600 |
| C | 2.95938400  | -0.96163500 | -2.24664100 | C             | -0.83505400 | -0.82647000 | -1.01795100 |
| H | 2.54660500  | -1.75471100 | -2.88279500 | H             | 0.39063300  | 0.84733800  | 1.66815200  |

|              |             |             |             |               |             |             |             |
|--------------|-------------|-------------|-------------|---------------|-------------|-------------|-------------|
| H            | -2.05007700 | 1.28050600  | 1.99787000  | O             | -0.04094000 | -2.41405900 | 2.35561900  |
| H            | -2.91408700 | -0.99986500 | -1.56391100 | O             | -1.10730800 | -0.34039000 | 1.49890800  |
| H            | -0.50414700 | -1.41440800 | -1.87932100 | H             | -2.11038900 | -0.67958500 | 0.20739700  |
| C            | 1.59305600  | -0.63261700 | -0.29152200 | C             | 1.10487700  | -1.20402300 | 0.32150400  |
| H            | 1.78390100  | -0.83658300 | -1.36483600 | C             | 0.45130200  | -1.53980900 | -0.87007200 |
| C            | 2.01376100  | -1.86764400 | 0.51125900  | C             | 2.49140000  | -1.04920400 | 0.33879300  |
| H            | 1.35244000  | -2.70027300 | 0.22064300  | C             | 1.19419700  | -1.70720300 | -2.03773600 |
| H            | 1.81542700  | -1.66646300 | 1.57860400  | H             | -0.63514900 | -1.63316900 | -0.89952000 |
| C            | 3.47570600  | -2.25130400 | 0.30415100  | C             | 3.22415300  | -1.21390600 | -0.83986900 |
| H            | 4.14047200  | -1.42448800 | 0.59593900  | H             | 2.99124100  | -0.78396800 | 1.27116900  |
| H            | 3.74486100  | -3.13693100 | 0.90205300  | C             | 2.59094500  | -1.54260000 | -2.04717400 |
| H            | 3.67832800  | -2.48638200 | -0.75459800 | H             | 0.67810800  | -1.95733400 | -2.96928200 |
| O            | 2.41138500  | 0.44504900  | 0.13245900  | H             | 4.30864100  | -1.07584200 | -0.82172300 |
| C            | 2.41573100  | 1.56226500  | -0.73633700 | H             | -3.51511200 | 1.74221600  | 0.43769800  |
| H            | 1.38968200  | 1.95738100  | -0.86729700 | C             | -3.66017800 | -1.84433400 | 0.09896000  |
| H            | 2.77066400  | 1.25483800  | -1.74101300 | H             | -4.11956100 | -1.39321400 | 1.00211600  |
| C            | 3.31922600  | 2.62993300  | -0.15546500 | H             | -4.48173200 | -2.00932200 | -0.62004000 |
| H            | 4.34601100  | 2.24903700  | -0.03216300 | C             | 3.37004300  | -1.68956800 | -3.32735700 |
| H            | 3.35244600  | 3.50724400  | -0.82068700 | H             | 4.45454500  | -1.67819000 | -3.14442500 |
| H            | 2.95260700  | 2.95763500  | 0.83081100  | H             | 3.11548500  | -2.62832800 | -3.84569500 |
| O            | -3.94120300 | 0.46164400  | 0.50875900  | H             | 3.13692300  | -0.86652600 | -4.02491300 |
| C            | -4.93939800 | -0.02065900 | -0.37222800 | C             | -4.82843900 | 1.51524000  | -1.29242900 |
| H            | -4.95216400 | -1.12395100 | -0.41111100 | H             | -5.73475000 | 1.78076200  | -0.72764100 |
| H            | -5.90165900 | 0.33353000  | 0.02173100  | H             | -4.93479600 | 1.91605600  | -2.31332900 |
| H            | -4.80502300 | 0.37086800  | -1.39576500 | H             | -4.76455400 | 0.41997200  | -1.35666800 |
|              |             |             |             | C             | -3.01349700 | -3.17418900 | 0.46697000  |
| <b>TS1-s</b> |             |             |             | H             | -2.17300900 | -3.02051000 | 1.16283600  |
| C            | -1.03404800 | 1.93052600  | -0.83637000 | H             | -3.74716700 | -3.84528400 | 0.94555900  |
| C            | -0.75903200 | 2.28444500  | 0.52692400  | H             | -2.62502800 | -3.68007100 | -0.43313100 |
| C            | 0.52601200  | 2.40054200  | 0.98772100  | C             | 3.20517400  | 2.27624400  | 1.87412500  |
| C            | 1.60710800  | 2.14176500  | 0.10582500  | H             | 2.96721200  | 3.28693800  | 2.23954300  |
| C            | 1.36929100  | 1.83590300  | -1.26460800 | H             | 2.66398800  | 1.51577100  | 2.45587000  |
| C            | 0.08498500  | 1.71185500  | -1.71535200 | H             | 4.28705400  | 2.10866200  | 1.93243000  |
| H            | -1.58679400 | 2.45314700  | 1.21363600  | O             | 2.86836400  | 2.15453800  | 0.48258000  |
| H            | 0.70957300  | 2.63462200  | 2.03300100  |               |             |             |             |
| H            | 2.22850400  | 1.65476900  | -1.91033400 | <b>INT2-s</b> |             |             |             |
| H            | -0.11139200 | 1.43819400  | -2.75402000 | C             | -0.88587100 | -0.26835400 | -0.21339600 |
| C            | -2.32023700 | 1.79276800  | -1.32472300 | C             | -0.41228600 | 1.09181500  | -0.17723600 |
| H            | -2.40652700 | 1.50236700  | -2.37862300 | C             | 0.92276100  | 1.36032600  | -0.07008100 |
| C            | -3.58576500 | 2.07678800  | -0.60893300 | C             | 1.86524900  | 0.29079100  | 0.01021100  |
| H            | -3.65583400 | 3.18322100  | -0.55087100 | C             | 1.42905300  | -1.06273200 | -0.02683200 |
| O            | -2.75051000 | -0.94089800 | -0.50068800 | C             | 0.08716600  | -1.32488000 | -0.13366800 |
| S            | 0.18195200  | -1.03000200 | 1.86237000  | H             | -1.12476500 | 1.91530400  | -0.23200000 |
| O            | 1.03533600  | -0.19828700 | 2.75281000  | H             | 1.30309000  | 2.38236200  | -0.03810900 |



|           |             |             |             |              |             |             |             |
|-----------|-------------|-------------|-------------|--------------|-------------|-------------|-------------|
| H         | 2.14688300  | -1.87942700 | 0.03290600  | H            | -3.14330900 | 3.10417500  | -0.56665900 |
| H         | -0.26473500 | -2.35851800 | -0.16011500 | C            | 4.59626000  | -0.56168400 | 0.81400200  |
| C         | -2.22247900 | -0.60555200 | -0.31447300 | H            | 4.50741000  | -1.65476700 | 0.66397700  |
| H         | -2.45364600 | -1.67802000 | -0.31518600 | H            | 5.63541100  | -0.27507900 | 0.61064100  |
| C         | -3.38860500 | 0.29140100  | -0.40345700 | H            | 4.39401400  | -0.35712800 | 1.88032900  |
| C         | -4.39163700 | 0.02649300  | 0.73529900  | N            | 3.71440000  | 0.18866400  | -0.05619400 |
| H         | -3.88740500 | 0.05030200  | -1.36288300 | C            | 4.27728300  | 0.98998300  | -1.12335100 |
| H         | -3.10312800 | 1.35082600  | -0.43605300 | H            | 4.07945300  | 0.56268600  | -2.12540200 |
| H         | -5.28107300 | 0.65866100  | 0.59608900  | H            | 3.87592500  | 2.01850700  | -1.11773900 |
| H         | -4.71407200 | -1.02627700 | 0.74898700  | H            | 5.36449800  | 1.05580100  | -0.99145300 |
| H         | -3.94508900 | 0.26477500  | 1.71269200  |              |             |             |             |
| O         | 3.12251600  | 0.64936700  | 0.12069100  | <b>TS1-t</b> |             |             |             |
| C         | 4.16780300  | -0.33205200 | 0.21919800  | C            | -0.52460000 | -2.15846800 | -0.18340300 |
| H         | 5.10023100  | 0.23690600  | 0.30751900  | C            | 0.07139700  | -1.47149800 | -1.27834700 |
| H         | 4.02279000  | -0.95736600 | 1.11233900  | C            | 1.42550500  | -1.23880400 | -1.32924700 |
| H         | 4.19385800  | -0.95801300 | -0.68509900 | C            | 2.28919700  | -1.67390600 | -0.27326800 |
|           |             |             |             | C            | 1.69048300  | -2.34944400 | 0.83747600  |
| <b>It</b> |             |             |             | C            | 0.33329100  | -2.56936300 | 0.87375800  |
| C         | -0.48134700 | -0.39517200 | 0.17179400  | H            | -0.55709100 | -1.09944800 | -2.08721200 |
| C         | 0.08648600  | 0.43274200  | -0.80702100 | H            | 1.83634700  | -0.70458600 | -2.18321000 |
| C         | 1.46318800  | 0.63039700  | -0.89299600 | H            | 2.30548300  | -2.69241300 | 1.66678800  |
| C         | 2.35188100  | -0.00526900 | 0.01427400  | H            | -0.10440100 | -3.08119100 | 1.73461600  |
| C         | 1.77279600  | -0.84613500 | 0.99998100  | C            | -1.91364100 | -2.41096600 | -0.09616800 |
| C         | 0.39100400  | -1.02204800 | 1.06989800  | H            | -2.22795600 | -3.04909600 | 0.73403200  |
| H         | -0.57112300 | 0.94406700  | -1.51477000 | C            | -2.84675400 | -2.31158400 | -1.26142700 |
| H         | 1.85033200  | 1.28682200  | -1.67147200 | H            | -2.36371100 | -2.85652600 | -2.09276000 |
| H         | 2.40369000  | -1.36004500 | 1.72411900  | O            | -2.48081400 | -0.75308600 | 1.03593400  |
| H         | -0.01843800 | -1.67165500 | 1.85010700  | S            | -1.56561900 | 2.25183900  | -0.73603000 |
| C         | -1.97786300 | -0.64618800 | 0.21387500  | O            | -1.44969600 | 2.95844000  | -2.02976900 |
| H         | -2.24714500 | -0.96323700 | 1.24243100  | O            | -2.27511600 | 2.99574200  | 0.33537000  |
| C         | -2.40202100 | -1.75726800 | -0.75195000 | O            | -2.12589400 | 0.85126900  | -0.91141000 |
| H         | -1.79603200 | -2.64958800 | -0.52425100 | H            | -2.29301000 | -0.06643500 | 0.31360000  |
| H         | -2.12837100 | -1.44503000 | -1.77512100 | C            | 0.11102300  | 2.00053200  | -0.12582700 |
| C         | -3.88882700 | -2.09142500 | -0.67756900 | C            | 0.31836400  | 1.31041000  | 1.07282400  |
| H         | -4.50002100 | -1.20747700 | -0.91408200 | C            | 1.19521000  | 2.51191800  | -0.84052500 |
| H         | -4.15452900 | -2.89251700 | -1.38613500 | C            | 1.61740600  | 1.14119000  | 1.55251300  |
| H         | -4.16930300 | -2.43127100 | 0.33401000  | H            | -0.52552700 | 0.88586300  | 1.61920700  |
| O         | -2.72503400 | 0.51208200  | -0.12621400 | C            | 2.49065600  | 2.33888200  | -0.34765100 |
| C         | -2.72360300 | 1.52763500  | 0.85807000  | H            | 1.01373700  | 3.04101400  | -1.77725600 |
| H         | -1.68984600 | 1.86327800  | 1.06989300  | C            | 2.72414300  | 1.65778700  | 0.85795600  |
| H         | -3.13119300 | 1.12947200  | 1.80984600  | H            | 1.77806300  | 0.59201700  | 2.48366900  |
| C         | -3.56153200 | 2.68892000  | 0.36462600  | H            | 3.33770100  | 2.74412100  | -0.90821300 |
| H         | -4.59650500 | 2.36773000  | 0.16385200  | H            | -2.89510500 | -1.26300500 | -1.59723400 |
| H         | -3.58767500 | 3.49102900  | 1.11914800  | C            | -3.79304300 | -0.50647100 | 1.53874500  |

|               |             |             |             |              |             |             |             |
|---------------|-------------|-------------|-------------|--------------|-------------|-------------|-------------|
| H             | -4.49759400 | -0.34627700 | 0.70391200  | C            | -3.76586100 | 0.99289000  | 0.20720100  |
| H             | -4.11229300 | -1.41303000 | 2.07787600  | H            | -4.79746100 | 0.63285500  | 0.26511600  |
| C             | 4.12254100  | 1.50431500  | 1.39279800  | H            | -3.54119100 | 1.57083000  | 1.11645500  |
| H             | 4.82069000  | 1.18468200  | 0.60424000  | H            | -3.67022900 | 1.65403100  | -0.66693200 |
| H             | 4.49824100  | 2.46584700  | 1.78374900  | N            | -2.86781000 | -0.15782700 | 0.08928700  |
| H             | 4.16346200  | 0.77240000  | 2.21160200  | C            | -3.45849600 | -1.49813200 | 0.10242800  |
| C             | -4.23675400 | -2.89074400 | -1.01470600 | H            | -3.25741100 | -2.02339200 | -0.84360800 |
| H             | -4.85085200 | -2.81800700 | -1.92547100 | H            | -3.05372700 | -2.09441700 | 0.93359800  |
| H             | -4.17623200 | -3.95481700 | -0.73395700 | H            | -4.54145100 | -1.40672700 | 0.23081700  |
| H             | -4.76706700 | -2.36172400 | -0.21050200 |              |             |             |             |
| C             | -3.79200100 | 0.70277100  | 2.46024800  | <b>1u</b>    |             |             |             |
| H             | -3.44290200 | 1.59399500  | 1.91497500  | C            | -0.71808100 | 0.23713700  | 0.14001100  |
| H             | -4.81000600 | 0.89312000  | 2.83915300  | C            | -1.12718700 | -0.59217800 | -0.91433000 |
| H             | -3.12727600 | 0.53420600  | 3.32318300  | C            | -2.47648300 | -0.91790600 | -1.07971800 |
| C             | 4.49414100  | -1.95476500 | 0.72951600  | C            | -3.43562000 | -0.41439600 | -0.19395300 |
| H             | 4.47474600  | -3.05676800 | 0.78282500  | C            | -3.03525600 | 0.41238000  | 0.86118100  |
| H             | 5.52175800  | -1.63538600 | 0.52504000  | C            | -1.68410300 | 0.73204700  | 1.02696100  |
| H             | 4.20055600  | -1.55669500 | 1.71264700  | H            | -0.37431800 | -0.98836000 | -1.59933400 |
| N             | 3.62262100  | -1.45757100 | -0.32626000 | H            | -2.78149400 | -1.56852000 | -1.90378500 |
| C             | 4.22088600  | -0.81141500 | -1.48626000 | H            | -3.77731700 | 0.80476700  | 1.56157100  |
| H             | 4.06948700  | -1.40657900 | -2.40267600 | H            | -1.37262200 | 1.37259200  | 1.85736200  |
| H             | 3.79224300  | 0.18913200  | -1.64916300 | C            | 0.74158500  | 0.63927700  | 0.28418600  |
| H             | 5.29753200  | -0.70203400 | -1.31819800 | H            | 0.93724300  | 0.85040500  | 1.35492200  |
|               |             |             |             | C            | 1.05332200  | 1.90640700  | -0.51885500 |
| <b>INT2-t</b> |             |             |             | H            | 0.33649900  | 2.68567300  | -0.21278200 |
| C             | 1.28285600  | 0.36450500  | -0.22629800 | H            | 0.85240400  | 1.69426600  | -1.58348900 |
| C             | 0.68416600  | -0.95071700 | -0.24125000 | C            | 2.48562800  | 2.39737800  | -0.33381900 |
| C             | -0.66262100 | -1.12329400 | -0.14278200 | H            | 3.20563600  | 1.62427200  | -0.64145300 |
| C             | -1.55050900 | 0.01111600  | -0.01980900 | H            | 2.67684600  | 3.30280100  | -0.93193200 |
| C             | -0.96572500 | 1.33161100  | -0.01561400 | H            | 2.68782600  | 2.64288200  | 0.72254600  |
| C             | 0.38288600  | 1.49008500  | -0.11264600 | O            | 1.62221100  | -0.37589800 | -0.16187400 |
| H             | 1.32449300  | -1.82908300 | -0.33051400 | C            | 1.73926000  | -1.48305800 | 0.71350000  |
| H             | -1.07149400 | -2.13122100 | -0.15543500 | H            | 0.74994200  | -1.95024200 | 0.88379800  |
| H             | -1.60297300 | 2.20883100  | 0.07125900  | H            | 2.10645800  | -1.14074400 | 1.70213800  |
| H             | 0.81223700  | 2.49469000  | -0.10321100 | C            | 2.69690400  | -2.48680100 | 0.10668400  |
| C             | 2.63617600  | 0.58713700  | -0.30437100 | H            | 3.68663500  | -2.03142500 | -0.05941100 |
| H             | 2.96039200  | 1.63426600  | -0.26461700 | H            | 2.82094900  | -3.35119300 | 0.77795200  |
| C             | 3.72639100  | -0.41125100 | -0.40766600 | H            | 2.31846300  | -2.85226600 | -0.86165000 |
| C             | 4.69852400  | -0.31288900 | 0.78080100  | H            | -4.49065800 | -0.66945200 | -0.32255500 |
| H             | 4.28622400  | -0.18154100 | -1.33421300 |              |             |             |             |
| H             | 3.34068900  | -1.43504700 | -0.50471800 | <b>TS1-u</b> |             |             |             |
| H             | 5.53252400  | -1.01780700 | 0.64336900  | C            | 0.00080800  | 2.50014500  | 0.10891700  |
| H             | 5.11792900  | 0.70164200  | 0.87211100  | C            | -0.48477200 | 1.91468300  | -1.10218800 |
| H             | 4.18940000  | -0.55948800 | 1.72555100  | C            | -1.84152100 | 1.70724700  | -1.26632200 |

|   |             |             |             |               |             |             |
|---|-------------|-------------|-------------|---------------|-------------|-------------|
| C | -2.73229900 | 2.03122000  | -0.23047000 |               |             |             |
| C | -2.27814100 | 2.59169300  | 0.97704100  | <b>INT2-u</b> |             |             |
| C | -0.92889500 | 2.83115600  | 1.14738200  | C             | 0.07263200  | -0.23287600 |
| H | 0.20654500  | 1.60622100  | -1.88495500 | C             | 0.54910100  | 1.11549100  |
| H | -2.21697700 | 1.25863500  | -2.18592500 | C             | 1.90326000  | 1.35980300  |
| H | -2.98927600 | 2.83008400  | 1.76958700  | C             | 2.80610200  | 0.28188000  |
| H | -0.54884300 | 3.27158700  | 2.07169000  | C             | 2.36423800  | -1.05023500 |
| C | 1.35274500  | 2.76803300  | 0.32708500  | C             | 1.01156200  | -1.31085600 |
| H | 1.59695700  | 3.22527300  | 1.29512100  | H             | -0.15616800 | 1.94576400  |
| C | 2.47532500  | 2.54845200  | -0.58879000 | H             | 2.27659900  | 2.38411000  |
| H | 2.53254800  | 3.49498500  | -1.17411300 | H             | 3.08421400  | -1.86828600 |
| O | 2.52235100  | -0.46018600 | 1.83038500  | H             | 0.63878000  | -2.33645600 |
| S | 0.84514300  | -1.28152800 | -1.50124200 | C             | -1.27999600 | -0.55137000 |
| O | 0.51683700  | -0.69772600 | -2.82907600 | H             | -1.52337100 | -1.62162200 |
| O | 1.27236400  | -2.70335500 | -1.54784100 | C             | -2.41851600 | 0.35427700  |
| O | 1.79857200  | -0.40662700 | -0.72988400 | C             | -3.60807700 | -0.01526700 |
| H | 2.26880200  | -0.45608500 | 0.87546500  | H             | -2.73048800 | 0.19582700  |
| C | -0.69621300 | -1.25160700 | -0.56530200 | H             | -2.14138200 | 1.41163500  |
| C | -0.71686600 | -0.89231800 | 0.78627600  | H             | -4.46300200 | 0.63365000  |
| C | -1.88323600 | -1.57848400 | -1.22512000 | H             | -3.91332400 | -1.06240300 |
| C | -1.93525100 | -0.83926400 | 1.46268200  | H             | -3.34879100 | 0.12508000  |
| H | 0.20967900  | -0.63813700 | 1.30191600  | H             | 3.87509200  | 0.48762100  |
| C | -3.09538700 | -1.52343400 | -0.53589400 |               |             |             |
| H | -1.85911300 | -1.84124000 | -2.28440200 | <b>1v</b>     |             |             |
| C | -3.14476600 | -1.14331100 | 0.81564800  | C             | -1.32873200 | 1.60717700  |
| H | -1.95137900 | -0.53669500 | 2.51339400  | C             | -0.35255400 | 2.58042200  |
| H | -4.02449700 | -1.76391300 | -1.05980700 | C             | 0.99645800  | 2.29891200  |
| H | 2.24432800  | 1.74690300  | -1.30377200 | C             | 1.38905200  | 1.02596300  |
| C | 3.20179200  | -1.67490900 | 2.07967200  | C             | 0.40688300  | 0.04972800  |
| H | 4.11035600  | -1.75517000 | 1.44678800  | C             | -0.94544800 | 0.33803000  |
| H | 3.55427100  | -1.64044400 | 3.12598900  | H             | -0.64351400 | 3.57473500  |
| C | -4.45136100 | -1.04777900 | 1.55674700  | H             | 1.75716500  | 3.06286400  |
| H | -4.47858400 | -1.75088500 | 2.40628200  | H             | 0.70473200  | -0.93313000 |
| H | -4.59480600 | -0.03769500 | 1.97552400  | C             | -1.98529800 | -0.75411600 |
| H | -5.30550200 | -1.27197700 | 0.90136300  | H             | -1.60804200 | -1.45125200 |
| C | 3.80585000  | 2.30448900  | 0.12661000  | C             | -2.21691800 | -1.55079700 |
| H | 4.60905600  | 2.15677500  | -0.61029600 | H             | -1.23901800 | -1.91989600 |
| H | 4.07874900  | 3.15853800  | 0.76681300  | H             | -2.58464000 | -0.85306500 |
| H | 3.73584800  | 1.40578500  | 0.75711400  | C             | -3.19143900 | -2.71053800 |
| C | 2.33271500  | -2.90857400 | 1.86712600  | H             | -4.17145000 | -2.34695800 |
| H | 1.98985400  | -2.97319000 | 0.82194400  | H             | -3.33927800 | -3.25594700 |
| H | 2.89974200  | -3.82590400 | 2.10113000  | H             | -2.81914100 | -3.43003700 |
| H | 1.44519300  | -2.88006700 | 2.52136100  | N             | 2.75988000  | 0.80840200  |
| H | -3.79939300 | 1.83959800  | -0.36360800 | H             | 3.37086200  | 1.59625800  |

|              |             |             |             |               |             |             |             |
|--------------|-------------|-------------|-------------|---------------|-------------|-------------|-------------|
| C            | 3.38531300  | -0.33109100 | 0.26520400  | C             | -2.18410400 | -2.03028300 | 0.38865400  |
| O            | 2.85854700  | -1.38879100 | 0.54959300  | H             | -1.70054200 | -0.85418000 | 2.13354200  |
| O            | 4.71441300  | -0.11121900 | 0.32825700  | H             | -2.33377600 | -3.10891500 | -1.48194900 |
| C            | 5.51494900  | -1.21319600 | 0.75711200  | H             | 3.31777700  | 1.65894200  | -0.78586500 |
| H            | 6.55217200  | -0.85531700 | 0.74951300  | C             | 3.34959900  | 0.21449000  | 3.10899200  |
| H            | 5.23708600  | -1.53187200 | 1.77340500  | H             | 4.39536000  | 0.34788600  | 2.76200600  |
| H            | 5.41001300  | -2.06827200 | 0.07194900  | H             | 3.27582200  | 0.73092400  | 4.08223400  |
| O            | -3.23564400 | -0.23107000 | 0.27082300  | C             | -3.62629800 | -2.24871500 | 0.76168700  |
| C            | -3.28202600 | 0.20332700  | 1.61801100  | H             | -4.30249500 | -1.89321600 | -0.03136800 |
| H            | -2.51496000 | 0.98022200  | 1.80252100  | H             | -3.83545600 | -3.32232300 | 0.90561200  |
| H            | -3.04807900 | -0.64478400 | 2.29276900  | H             | -3.88691400 | -1.72490300 | 1.69233000  |
| C            | -4.66388000 | 0.75054600  | 1.90783400  | C             | 3.67546000  | 3.55683200  | 0.24271400  |
| H            | -5.43347300 | -0.01906900 | 1.73476500  | H             | 4.72710700  | 3.63675100  | -0.06973100 |
| H            | -4.73285100 | 1.08018500  | 2.95655500  | H             | 3.25788500  | 4.57449400  | 0.30029000  |
| H            | -4.88675000 | 1.61298900  | 1.25898700  | H             | 3.64471200  | 3.11066100  | 1.24856300  |
| H            | -2.38668000 | 1.82596900  | -0.94799600 | C             | 3.06253000  | -1.27177200 | 3.28476800  |
|              |             |             |             | H             | 3.11741700  | -1.80008200 | 2.31893400  |
|              |             |             |             | H             | 3.79362500  | -1.72953000 | 3.97282000  |
| <b>TS1-v</b> |             |             |             | H             | 2.05462900  | -1.42927100 | 3.70417000  |
| C            | 0.52465800  | 1.77954300  | -1.11091600 | H             | -2.27150100 | -0.05949900 | -3.05778600 |
| C            | 0.80551800  | 1.21759600  | -2.39012500 | N             | -3.09294300 | 0.86074100  | -0.77159100 |
| C            | -0.20467500 | 0.56468200  | -3.06845000 | C             | -3.56977100 | 1.19752900  | 0.46905600  |
| C            | -1.48463800 | 0.46327600  | -2.50806800 | O             | -2.93852500 | 1.72760100  | 1.36102700  |
| C            | -1.79163100 | 1.01263000  | -1.24507800 | O             | -4.86364900 | 0.84929100  | 0.55817100  |
| C            | -0.77514500 | 1.65413300  | -0.53928800 | C             | -5.49946000 | 1.09352400  | 1.81524100  |
| H            | 1.80642500  | 1.28078400  | -2.81215700 | H             | -6.52917800 | 0.73133400  | 1.70760000  |
| H            | -0.01097300 | 0.10540300  | -4.03873600 | H             | -4.99204500 | 0.54698100  | 2.62400600  |
| H            | -0.96991400 | 2.07032600  | 0.44566300  | H             | -5.50182900 | 2.16822500  | 2.05111500  |
| C            | 1.50090000  | 2.43452900  | -0.35159100 | H             | -3.74761500 | 0.38840200  | -1.38885900 |
| H            | 1.19149000  | 2.74784300  | 0.65271700  |               |             |             |             |
| C            | 2.89144000  | 2.68759600  | -0.73269300 |               |             |             |             |
| H            | 2.94071200  | 3.05112000  | -1.77439300 | <b>INT2-v</b> |             |             |             |
| O            | 2.44518700  | 0.85381000  | 2.22777000  | C             | 1.97744000  | 1.47367500  | -0.04062100 |
| S            | 2.27097700  | -1.56751800 | -0.73250700 | C             | 1.93881500  | 0.04949600  | -0.15059500 |
| O            | 2.34792100  | -1.60687700 | -2.21348200 | C             | 0.68337700  | -0.62640400 | -0.15493300 |
| O            | 2.90648400  | -2.72407200 | -0.05007800 | C             | -0.51252500 | 0.08196200  | -0.05266600 |
| O            | 2.75156900  | -0.24716000 | -0.17618900 | C             | -0.44532800 | 1.49157700  | 0.05234000  |
| H            | 2.55551000  | 0.42193900  | 1.34649900  | C             | 0.78572100  | 2.16612500  | 0.05541300  |
| C            | 0.51960200  | -1.66563000 | -0.31296800 | H             | 0.66872200  | -1.71499900 | -0.23969200 |
| C            | 0.02546900  | -1.11107400 | 0.86985600  | H             | -1.37283800 | 2.05489700  | 0.13444100  |
| C            | -0.33263100 | -2.37857200 | -1.16147400 | H             | 0.78732200  | 3.25416600  | 0.14071300  |
| C            | -1.31660300 | -1.30262200 | 1.21446000  | N             | -1.70719300 | -0.63105400 | -0.05812000 |
| H            | 0.67510300  | -0.51906200 | 1.51602800  | H             | -1.62889000 | -1.64143000 | -0.14226500 |
| C            | -1.67127100 | -2.55348000 | -0.81187600 | C             | -2.98641300 | -0.13459200 | 0.03215400  |
| H            | 0.05803500  | -2.78193200 | -2.09719100 | O             | -3.29649000 | 1.03380600  | 0.13966000  |

|           |             |             |             |              |             |             |             |
|-----------|-------------|-------------|-------------|--------------|-------------|-------------|-------------|
| O         | -3.85669300 | -1.15316100 | -0.01693800 | O            | 0.79608000  | -1.73213900 | 0.38323500  |
| C         | -5.24306700 | -0.80850900 | 0.07050200  | C            | 0.87524600  | -1.78737800 | 1.80320000  |
| H         | -5.79293900 | -1.75558000 | 0.00933400  | H            | 0.78418300  | -0.77154300 | 2.23124200  |
| H         | -5.46234800 | -0.30782800 | 1.02544100  | H            | 1.86839400  | -2.17725900 | 2.09739500  |
| H         | -5.53585200 | -0.14943100 | -0.76038300 | C            | -0.23572800 | -2.68000400 | 2.31300500  |
| C         | 3.09414600  | -0.73213100 | -0.25264700 | H            | -0.14814300 | -3.69469200 | 1.89278100  |
| H         | 2.93960500  | -1.81702800 | -0.31906800 | H            | -0.19022000 | -2.75355000 | 3.41083400  |
| H         | 2.92981700  | 2.00274600  | -0.02921600 | H            | -1.22119100 | -2.27267200 | 2.03486300  |
| C         | 4.48742800  | -0.29037100 | -0.31103100 | H            | 0.85296500  | 4.45285300  | 0.48313400  |
| H         | 4.60306300  | 0.78335500  | -0.11483800 |              |             |             |             |
| H         | 4.76030100  | -0.45244600 | -1.37909800 | <b>TS1-w</b> |             |             |             |
| C         | 5.43104000  | -1.14257000 | 0.55168500  | C            | -0.43285000 | -0.35078900 | -2.14432900 |
| H         | 6.47061600  | -0.83073500 | 0.37647100  | C            | -0.77426800 | 0.82073200  | -2.89665100 |
| H         | 5.20373300  | -1.01121500 | 1.62035900  | C            | 0.20920200  | 1.66051800  | -3.35804200 |
| H         | 5.34169800  | -2.21180000 | 0.30526300  | C            | 1.56433900  | 1.36865300  | -3.06518300 |
|           |             |             |             | C            | 1.93489800  | 0.31470200  | -2.24669900 |
| <b>1w</b> |             |             |             | C            | 0.93608600  | -0.51121100 | -1.69218800 |
| C         | 1.43486300  | 0.61860800  | 0.02828100  | H            | -1.81776100 | 0.99293600  | -3.16014100 |
| C         | 0.12013000  | 1.15158700  | 0.00268500  | H            | -0.04192200 | 2.53006700  | -3.96749300 |
| C         | -0.07096000 | 2.53524100  | 0.16868700  | H            | 2.97518000  | 0.15626600  | -1.97847600 |
| C         | 1.02411200  | 3.38053900  | 0.35731400  | C            | -1.34408100 | -1.39099600 | -1.97662600 |
| C         | 2.32180100  | 2.86593700  | 0.39345500  | H            | -0.93735700 | -2.36419200 | -1.69562600 |
| C         | 2.50911100  | 1.49068600  | 0.23254900  | C            | -2.79606700 | -1.32498500 | -2.25208800 |
| H         | -1.08259100 | 2.93297500  | 0.14353800  | H            | -2.94416900 | -0.94874100 | -3.28064600 |
| H         | 3.17926800  | 3.52485800  | 0.54797000  | N            | 1.14715900  | -1.40720200 | -0.68500100 |
| H         | 3.51930400  | 1.07229200  | 0.25972100  | H            | 0.30677200  | -1.65841500 | -0.12118800 |
| C         | 1.73033000  | -0.85202700 | -0.24171500 | C            | 2.36483600  | -1.76352400 | -0.12477800 |
| H         | 2.73744000  | -1.07077600 | 0.15904100  | O            | 3.46281100  | -1.50799300 | -0.56708900 |
| C         | 1.72782700  | -1.16962500 | -1.74100300 | O            | 2.12991100  | -2.45693400 | 0.99330800  |
| H         | 2.44463800  | -0.48542200 | -2.22241900 | O            | -1.26933500 | -1.62524200 | 0.57121300  |
| H         | 0.73461900  | -0.92494700 | -2.15462000 | S            | -2.11296700 | 1.72915000  | 1.26532800  |
| C         | 2.08912900  | -2.61972100 | -2.04782100 | O            | -2.59808900 | 3.03775900  | 0.77465300  |
| H         | 1.37055500  | -3.31109600 | -1.58308900 | O            | -2.42808000 | 1.41828500  | 2.68211700  |
| H         | 2.09105400  | -2.80504000 | -3.13380800 | O            | -2.52214800 | 0.59888200  | 0.33605300  |
| H         | 3.09191100  | -2.86867600 | -1.66149700 | H            | -1.75178800 | -0.74047100 | 0.54808400  |
| N         | -0.94589600 | 0.25585700  | -0.16819600 | C            | -0.31462200 | 1.76596800  | 1.15024400  |
| H         | -0.68705000 | -0.73153000 | -0.10337000 | C            | 0.45179500  | 0.90128500  | 1.93851900  |
| C         | -2.27663700 | 0.52976700  | -0.29606600 | C            | 0.30418900  | 2.62283300  | 0.23920900  |
| O         | -2.80382200 | 1.62326100  | -0.36223400 | C            | 1.83798800  | 0.88395100  | 1.79363600  |
| O         | -2.96019700 | -0.63553600 | -0.34292800 | H            | -0.03768400 | 0.24700400  | 2.65912400  |
| C         | -4.37609300 | -0.52941200 | -0.48609800 | C            | 1.69490300  | 2.60224100  | 0.11010700  |
| H         | -4.75765000 | -1.55811600 | -0.50092300 | H            | -0.30540700 | 3.29931600  | -0.36166100 |
| H         | -4.81934300 | 0.02096100  | 0.35792700  | C            | 2.48424500  | 1.73033500  | 0.87492900  |
| H         | -4.64215300 | -0.01949100 | -1.42476200 | H            | 2.43354200  | 0.20090300  | 2.40533800  |

|   |             |             |             |   |             |             |             |
|---|-------------|-------------|-------------|---|-------------|-------------|-------------|
| H | 2.17696100  | 3.26850600  | -0.60954200 | H | -4.75667000 | -0.92041900 | -0.93968600 |
| H | -3.19668000 | -0.52491500 | -1.60019100 | H | -4.65523600 | -2.44529400 | 0.01413500  |
| C | -1.92470500 | -2.51010200 | 1.46695400  | H | -4.80314600 | -0.85918600 | 0.85536500  |
| H | -3.00544500 | -2.54526700 | 1.23607300  | C | 3.31826000  | -2.86358900 | -0.51917900 |
| H | -1.52014500 | -3.51929600 | 1.28275400  | H | 4.29935700  | -3.31820700 | -0.31807700 |
| C | 3.97895500  | 1.67667500  | 0.70850500  | H | 2.54422700  | -3.63380100 | -0.37648100 |
| H | 4.33096800  | 2.42274500  | -0.01887200 | H | 3.29449100  | -2.53912700 | -1.57059600 |
| H | 4.49442200  | 1.85904100  | 1.66609400  | H | 0.43213900  | 3.99931400  | -0.18378000 |
| H | 4.29122100  | 0.67956500  | 0.35780900  |   |             |             |             |
| C | 3.27997100  | -2.89921100 | 1.72344400  |   |             |             |             |
| H | 3.87461900  | -2.04033000 | 2.06798400  |   |             |             |             |
| H | 2.89247400  | -3.45681200 | 2.58427900  |   |             |             |             |
| H | 3.90886800  | -3.55201900 | 1.10053700  |   |             |             |             |
| C | -3.53149500 | -2.64450700 | -2.04799000 |   |             |             |             |
| H | -4.60680800 | -2.52251100 | -2.24620700 |   |             |             |             |
| H | -3.14672900 | -3.42321200 | -2.72561600 |   |             |             |             |
| H | -3.41507600 | -3.00526300 | -1.01506400 |   |             |             |             |
| C | -1.71432300 | -2.10375900 | 2.91723800  |   |             |             |             |
| H | -2.10451300 | -1.08789300 | 3.09022300  |   |             |             |             |
| H | -2.23503800 | -2.80237400 | 3.59315000  |   |             |             |             |
| H | -0.64146400 | -2.11325100 | 3.16921400  |   |             |             |             |
| H | 2.34578000  | 2.02171800  | -3.46150700 |   |             |             |             |

**INT2-w**

|   |             |             |             |
|---|-------------|-------------|-------------|
| C | 1.38883600  | 0.22594500  | 0.10056700  |
| C | 2.39938800  | 1.25453800  | 0.02423900  |
| C | 2.06974700  | 2.57718400  | -0.07540700 |
| C | 0.69973900  | 2.94226200  | -0.10933300 |
| C | -0.31943500 | 2.00733200  | -0.06335800 |
| C | -0.01959400 | 0.63175300  | 0.02202800  |
| H | 3.44591900  | 0.95512000  | 0.05540000  |
| H | 2.84267400  | 3.34514100  | -0.12756600 |
| H | -1.35752700 | 2.32218700  | -0.10482700 |
| C | 1.75165000  | -1.09475800 | 0.28408200  |
| H | 0.96473500  | -1.85360200 | 0.35718700  |
| C | 3.10193500  | -1.66951400 | 0.42584400  |
| H | 3.14382700  | -2.04529800 | 1.46896200  |
| N | -0.99580300 | -0.31668800 | 0.03139200  |
| H | -0.71877500 | -1.29470100 | 0.04921200  |
| C | -2.38303000 | -0.14140500 | -0.00043800 |
| O | -2.97097800 | 0.91175500  | -0.04059200 |
| O | -2.94817200 | -1.34723400 | 0.02051000  |
| H | 3.90139900  | -0.92688600 | 0.31731000  |
| C | -4.38309400 | -1.38384600 | -0.01498700 |

## 6. References

1. (a) F. Wang, J. Chen, X. Jia, D. Zhuang, Z. Wan, L. Ma and Z. Li, *J. Org. Chem.*, 2022, **87**, 10698–10709; (b) J. Chen, F. Wang, Y. Huang, X. Jia, D. Zhuang, Z. Wan and Z. Li, *Org. Chem. Front.*, 2022, **9**, 3169–3178.
2. P. V. Ramachandran, A. A. Alawaed and H. J. Hamann, *Org. Lett.*, 2022, **24**, 8481–8486.
3. J.-S. Li, J. Liu, Y.-T. Wang, J.-Y. Dai, Z.-W. Li, W.-W. Luo, Y.-F. Zhang, H.-W. Liu and W.-D. Liu, *Org. Lett.*, 2023, **25**, 8263–8268.
4. (a) S. R. Dandepally, R. Elgoummadi and A. L. Williams, *Tetrahedron Lett.*, 2013, **54**, 925–928; (b) G. S. Kumar, S. P. Ragini, A. S. Kumar and H. M. Meshram, *RSC Adv.*, 2015, **5**, 51576–51580.
5. M. J. Frisch, G. W. Trucks, H. B. Schlegel, G. E. Scuseria, M. A. Robb, J. R. Cheeseman, G. Scalmani, V. Barone, B. Mennucci, G. A. Petersson, H. Nakatsuji, M. Caricato, X. Li, H. P. Hratchian, A. F. Izmaylov, J. Bloino, G. Zheng, J. L. Sonnenberg, M. Hada, M. Ehara, K. Toyota, R. Fukuda, J. Hasegawa, M. Ishida, T. Nakajima, Y. Honda, O. Kitao, H. Nakai, T. Vreven, J. A. Montgomery Jr., J. E. Peralta, F. Ogliaro, M. Bearpark, J. J. Heyd, E. Brothers, K. N. Kudin, V. N. Staroverov, R. Kobayashi, J. Normand, K. Raghavachari, A. Rendell, J. C. Burant, S. S. Iyengar, J. Tomasi, M. Cossi, N. Rega, J. M. Millam, M. Klene, J. E. Knox, J. B. Cross, V. Bakken, C. Adamo, J. Jaramillo, R. Gomperts, R. E. Stratmann, O. Yazyev, A. J. Austin, R. Cammi, C. Pomelli, J. W. Ochterski, R. L. Martin, K. Morokuma, V. G. Zakrzewski, G. A. Voth, P. Salvador, J. J. Dannenberg, S. Dapprich, A. D. Daniels, Ö. Farkas, J. B. Foresman, J. V. Ortiz, J. Cioslowski and D. J. Fox, Gaussian 09, Revision A.01, Gaussian, Inc., Wallingford CT, 2009.
6. (a) A. D. Becke, *J. Chem. Phys.*, 1993, **98**, 5648–5652; (b) C. Lee, W. Yang and R. G. Parr, *Phys. Rev. B*, 1988, **37**, 785–789.
7. S. Grimme, S. Ehrlich and L. Goerigk, *J. Comp. Chem.*, 2011, **32**, 1456–1465.
8. (a) J. P. Hay and W. R. Wadt, *J. Chem. Phys.*, 1985, **82**, 299–310; (b) R. A. Friesner, R. B. Murphy, M. D. Beachy, M. N. Ringlanda, W. T. Pollard, B. D. Dunietz and Y. X. Cao, *J. Phys. Chem. A*, 1999, **103**, 1913–1928.
9. (a) K. Fukui, *J. Phys. Chem.*, 1970, **74**, 4161–4163; (b) C. Gonzalez and H. B. Schlegel, *J. Chem. Phys.*, 1989, **90**, 2154–2161; (c) C. Gonzalez and H. B. Schlegel, *J. Phys. Chem.*, 1990, **94**, 5523–5527.
10. A. V. Marenich, C. J. Cramer and D. G. Truhlar, *J. Phys. Chem. B*, 2009, **113**, 6378–6396.
11. Y. Zhao and D. G. Truhlar, *Theor. Chem. Account*, 2008, **120**, 215–241.
12. S. Grimme, J. Antony, S. Ehrlich and H. Krieg, *J. Chem. Phys.*, 2010, **132**, 154104.

## 7. NMR Spectra

### 7.1 Spectra of 2-Alkoxythiazoles

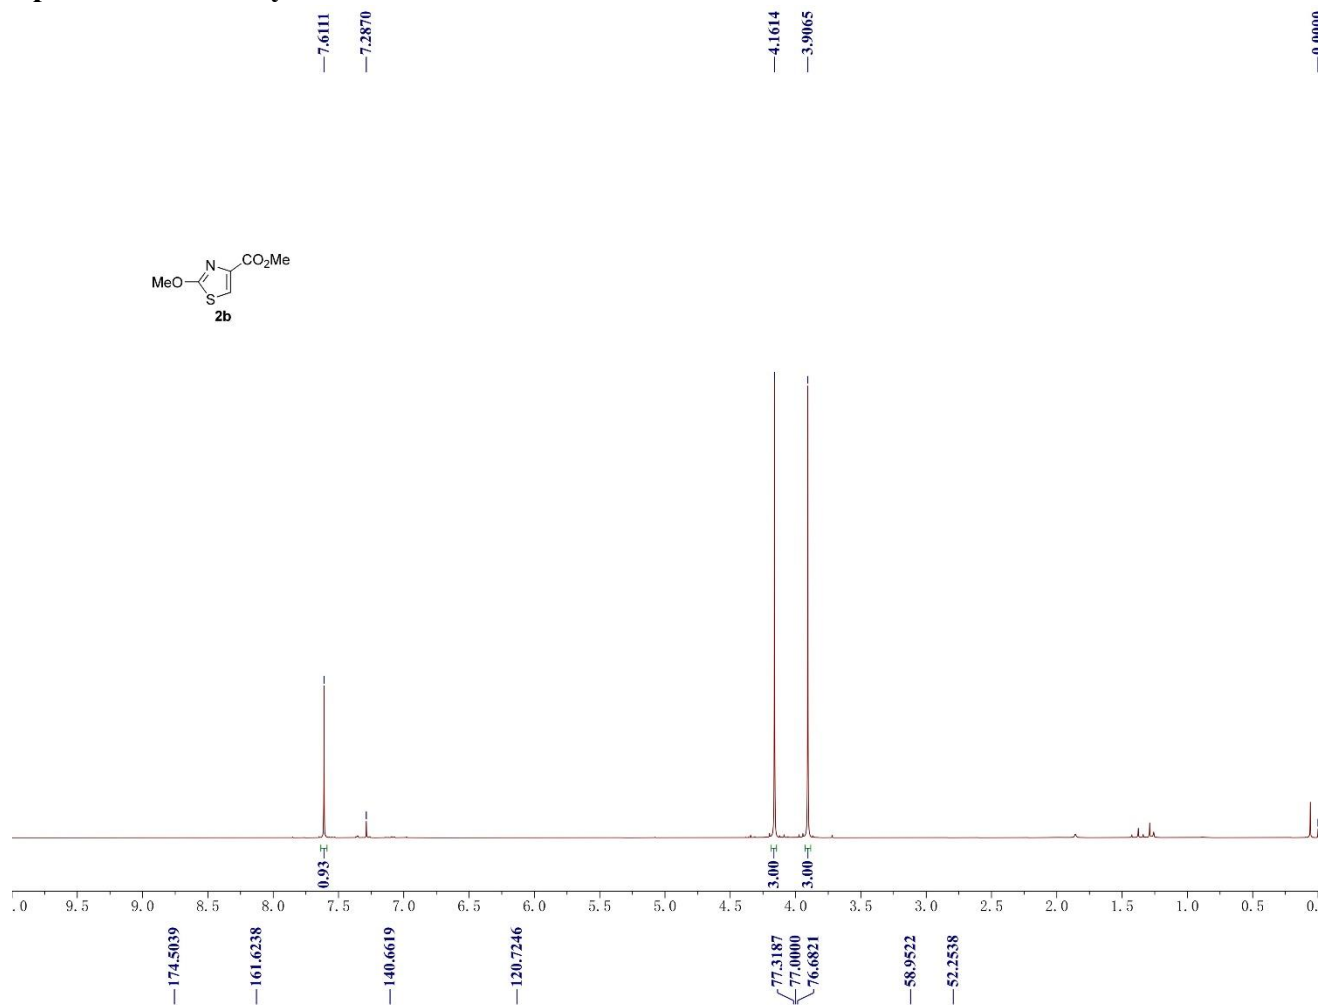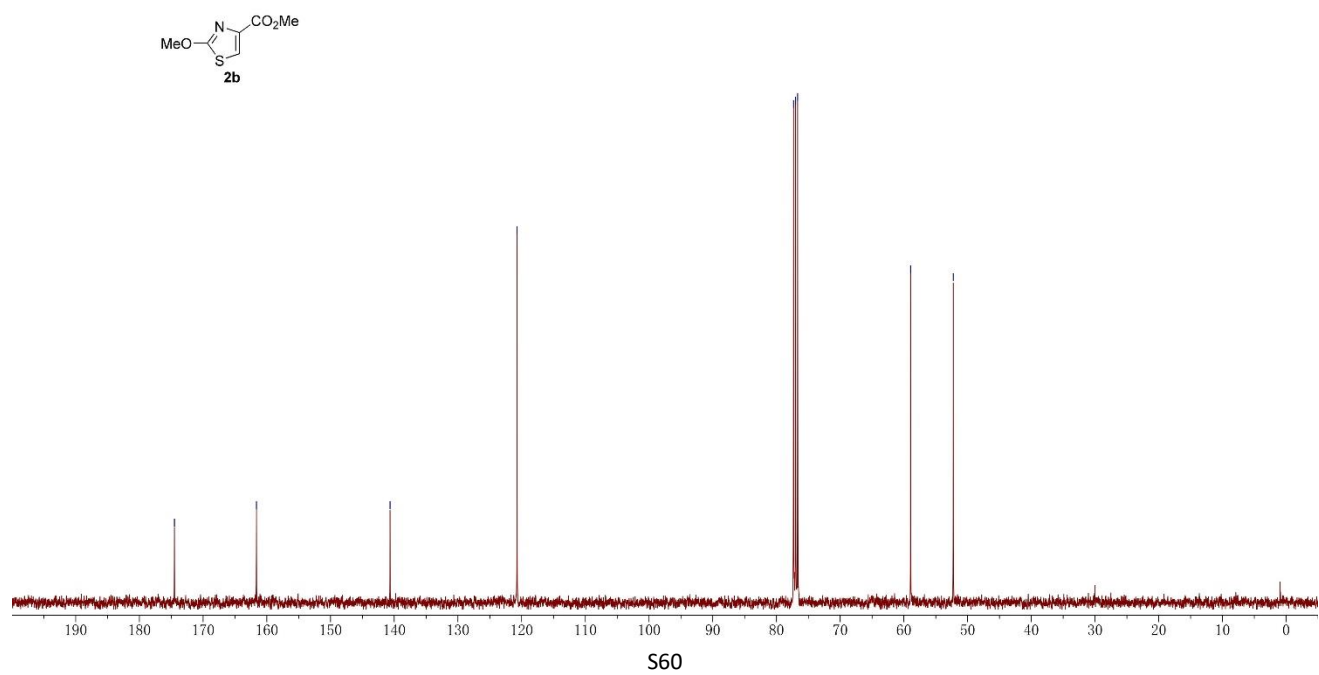



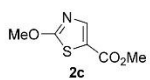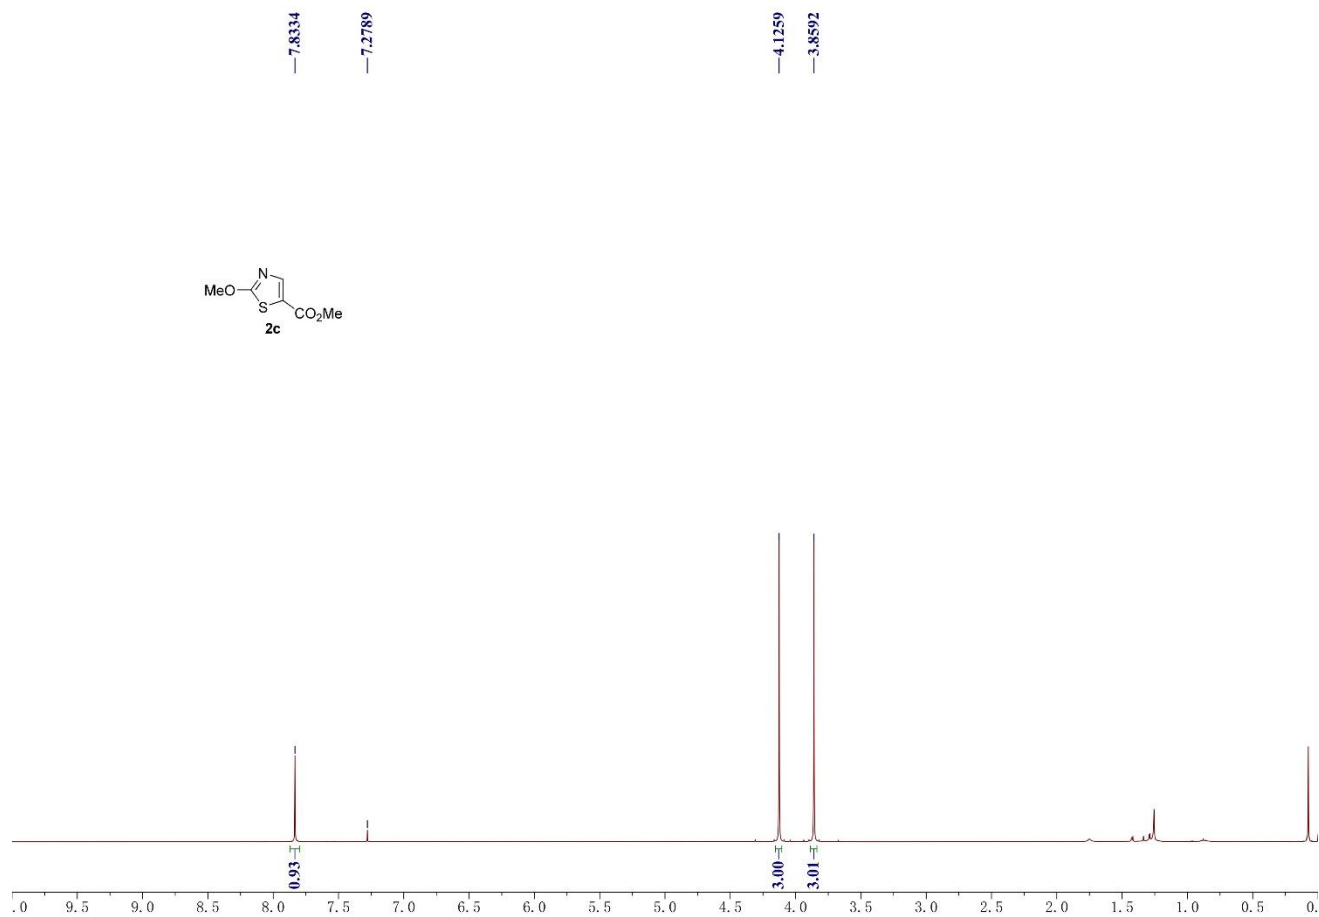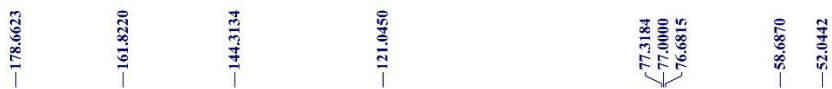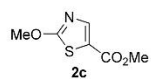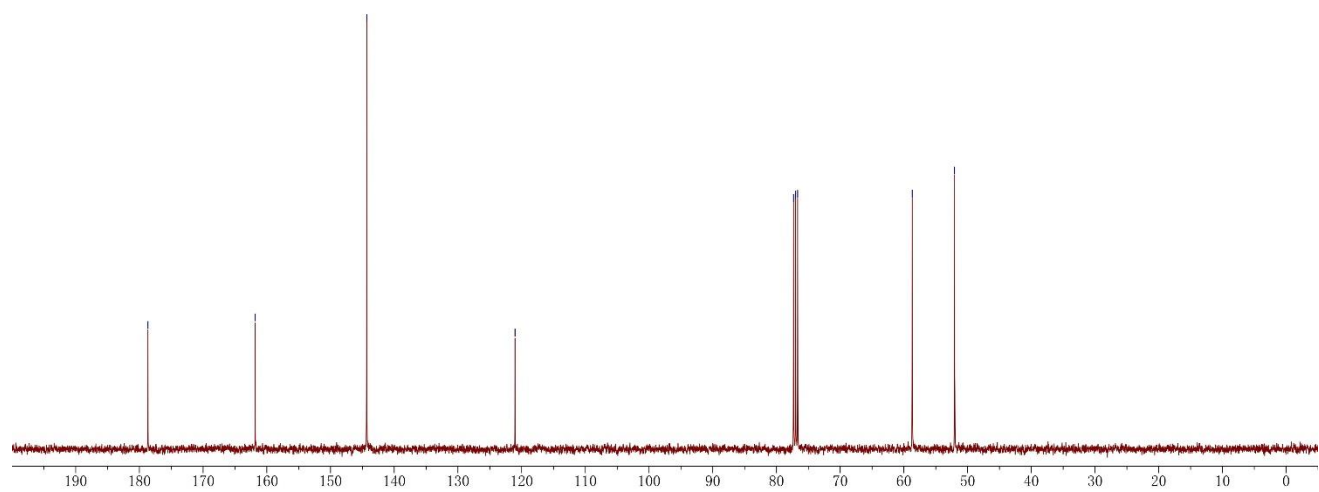

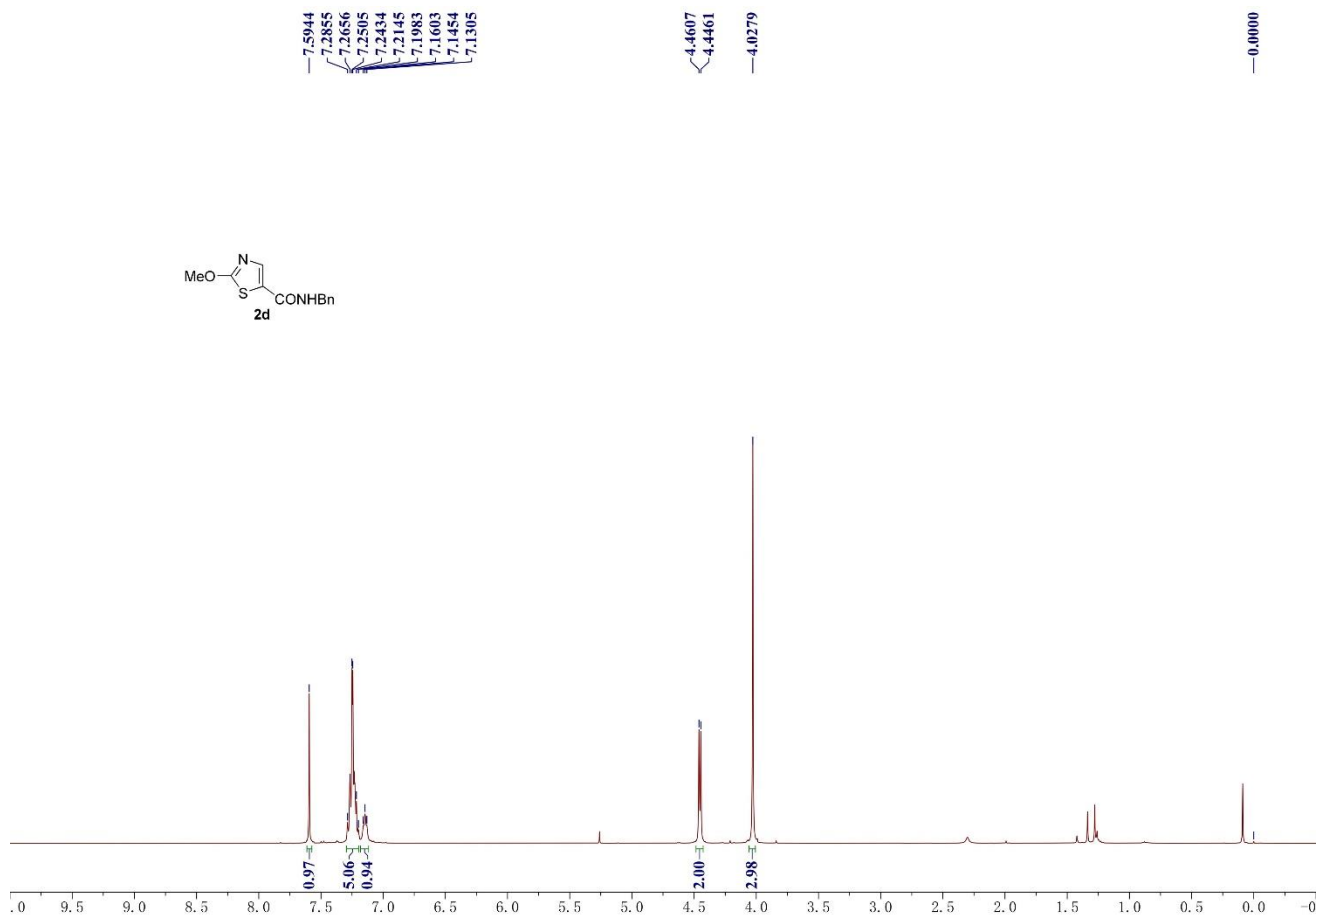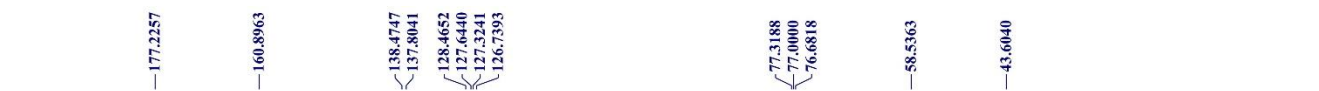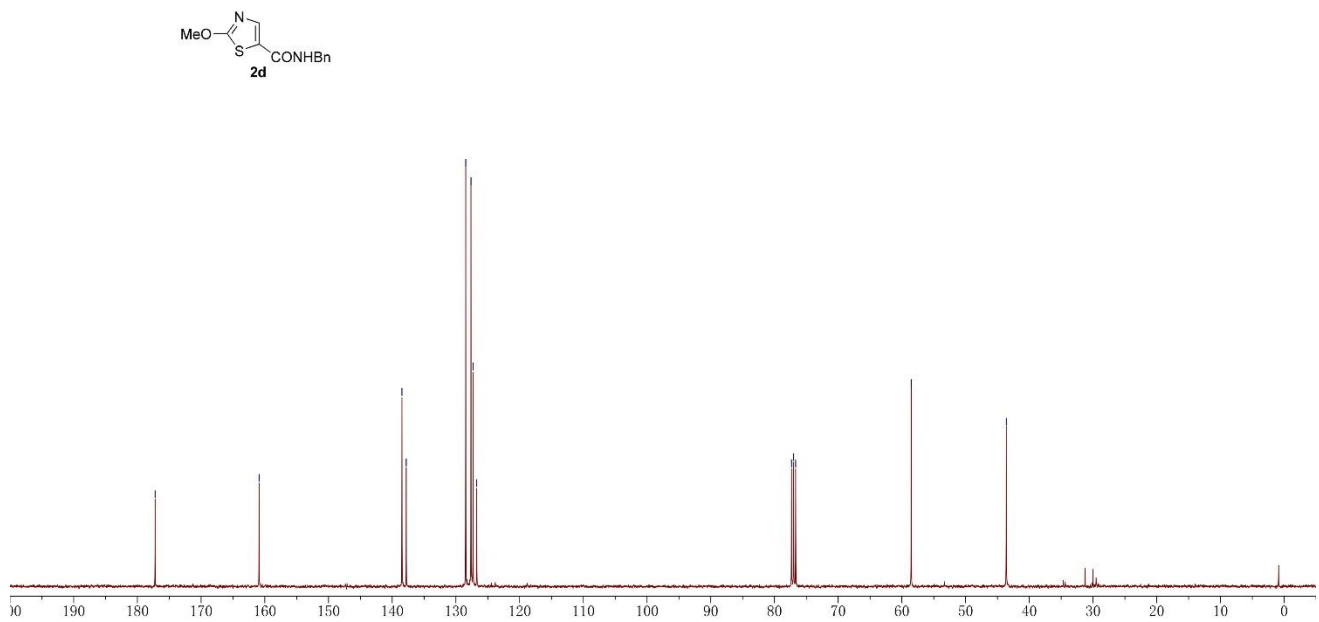

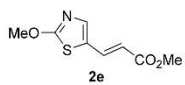

7.6671  
7.6282  
7.2918

5.9508  
5.9119

4.1075  
3.7705

0.0000

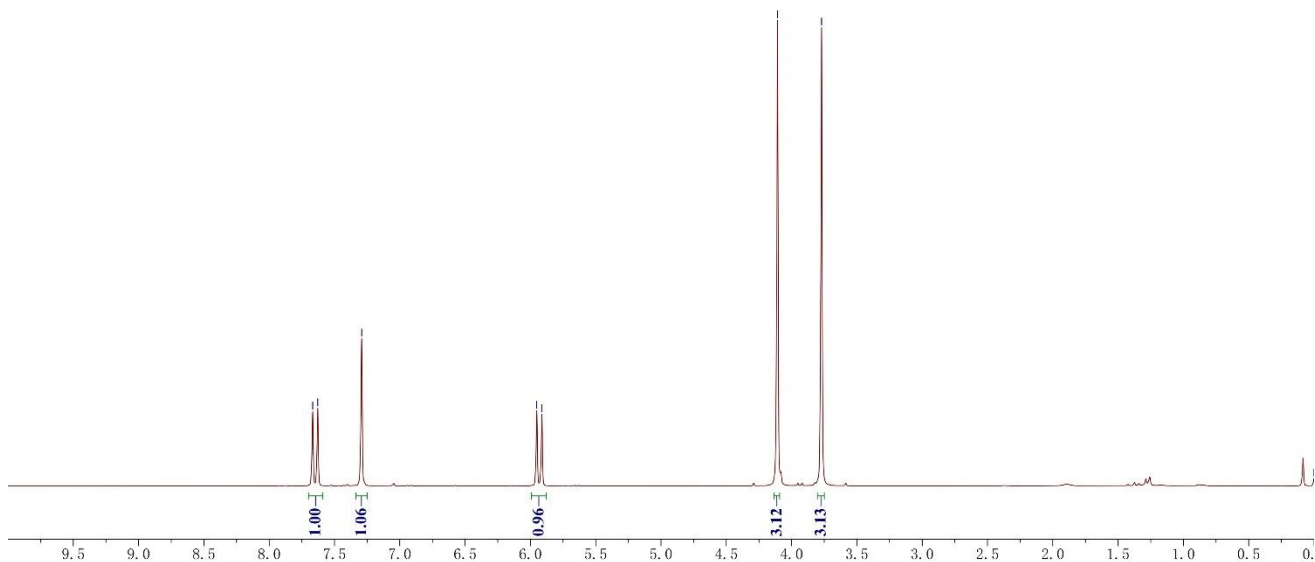

176.0207

166.7695

141.5868

135.0857

127.8177

116.7183  
116.6924

77.3185  
77.0000  
76.6822

58.5789

51.5604

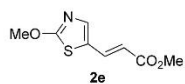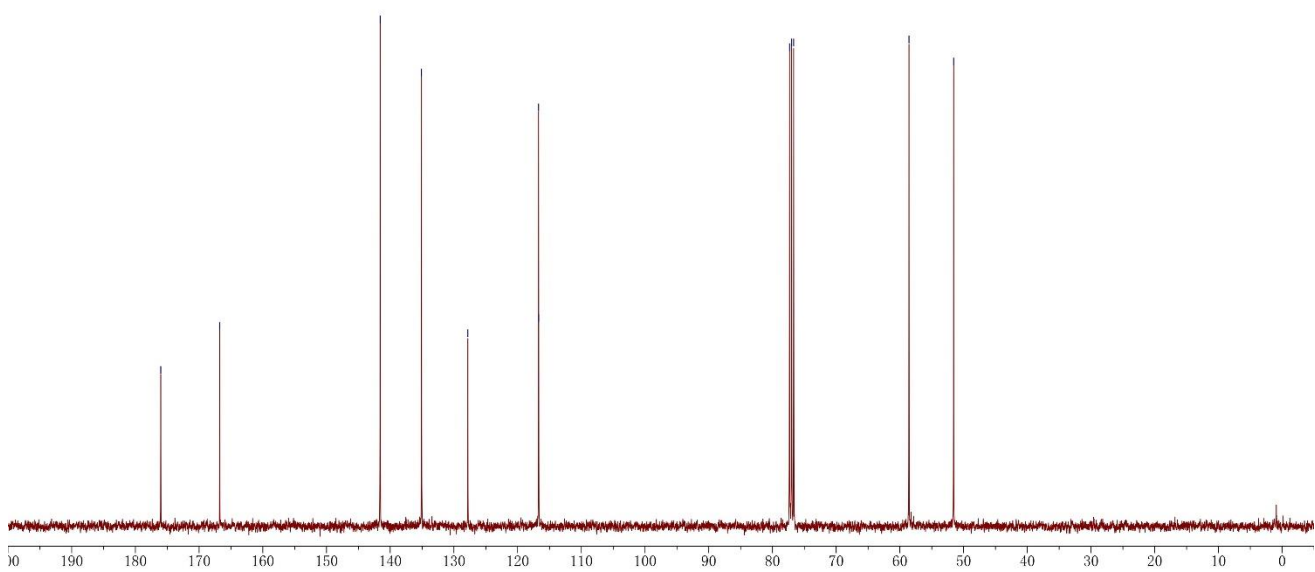

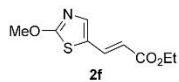

7.6624  
7.6236  
7.2946  
7.2929  
7.2912

5.9472  
5.9083

4.2568  
4.2390  
4.2212  
4.2033  
4.1856

1.3283  
1.3104  
1.2926

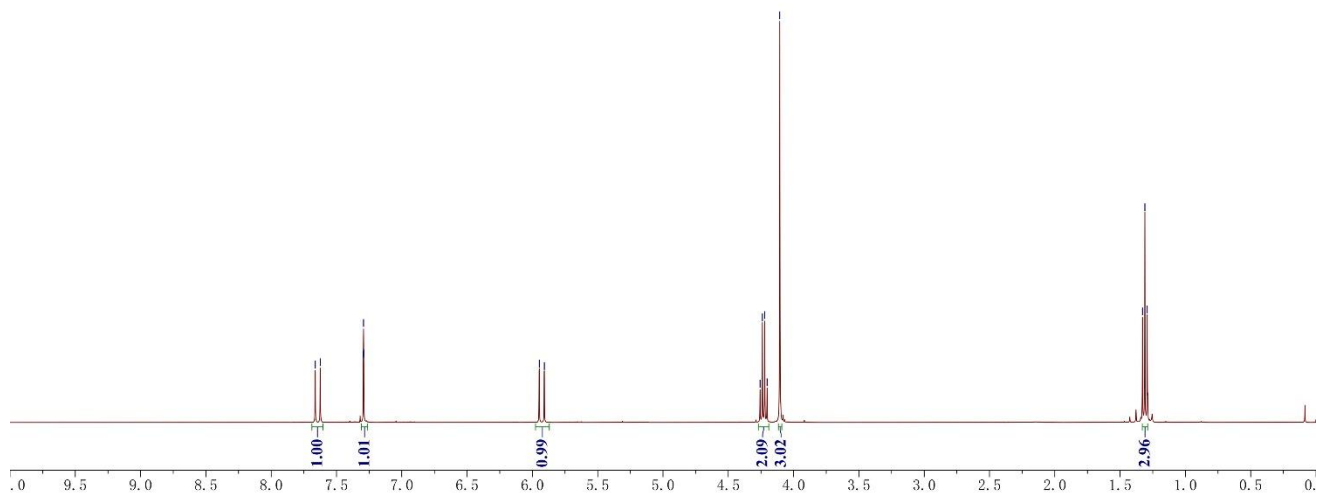

175.8612

166.2723

141.4172

134.7708

127.8152

117.1119

77.3176

77.0000

76.6809

60.3490

58.5071

14.1376

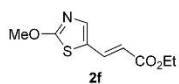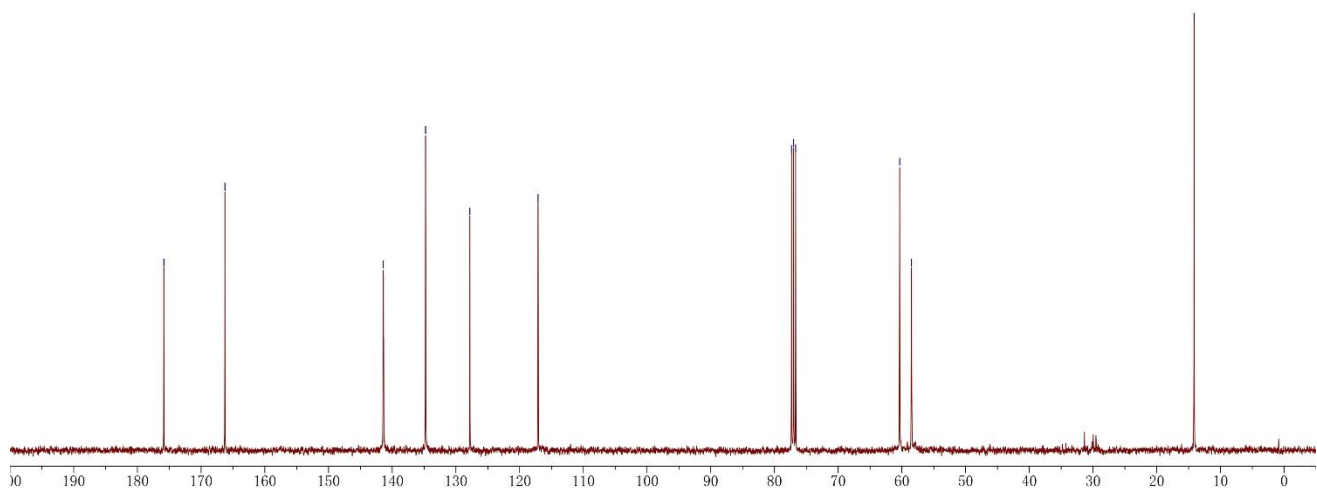

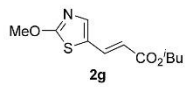

7.6641  
7.6625  
7.6252  
7.6237  
7.2986  
7.2969  
7.2952  
7.2915

5.9694  
5.9679  
5.9305  
5.9289

4.1098  
3.9706  
3.9539

2.0357  
2.0188  
2.0019  
1.9852  
1.9684  
1.9516  
1.9348

0.9767  
0.9598

0.0000

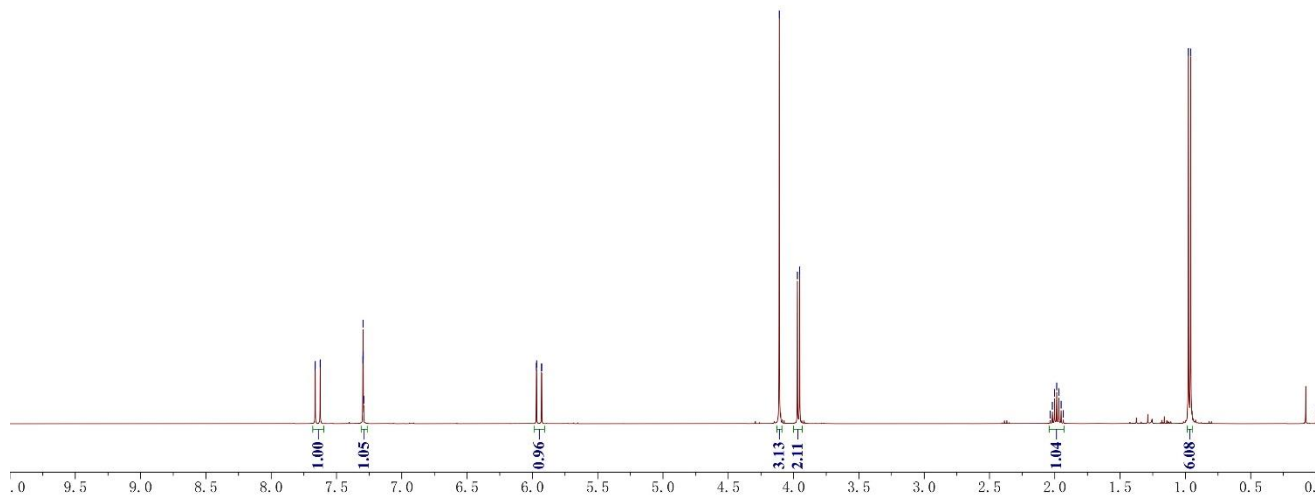

175.9552

166.4526

141.4400

134.8114

127.8974

117.2224

117.1978

77.3190

77.0000

76.6821

70.6093

58.5755

27.7388

19.0421

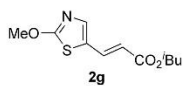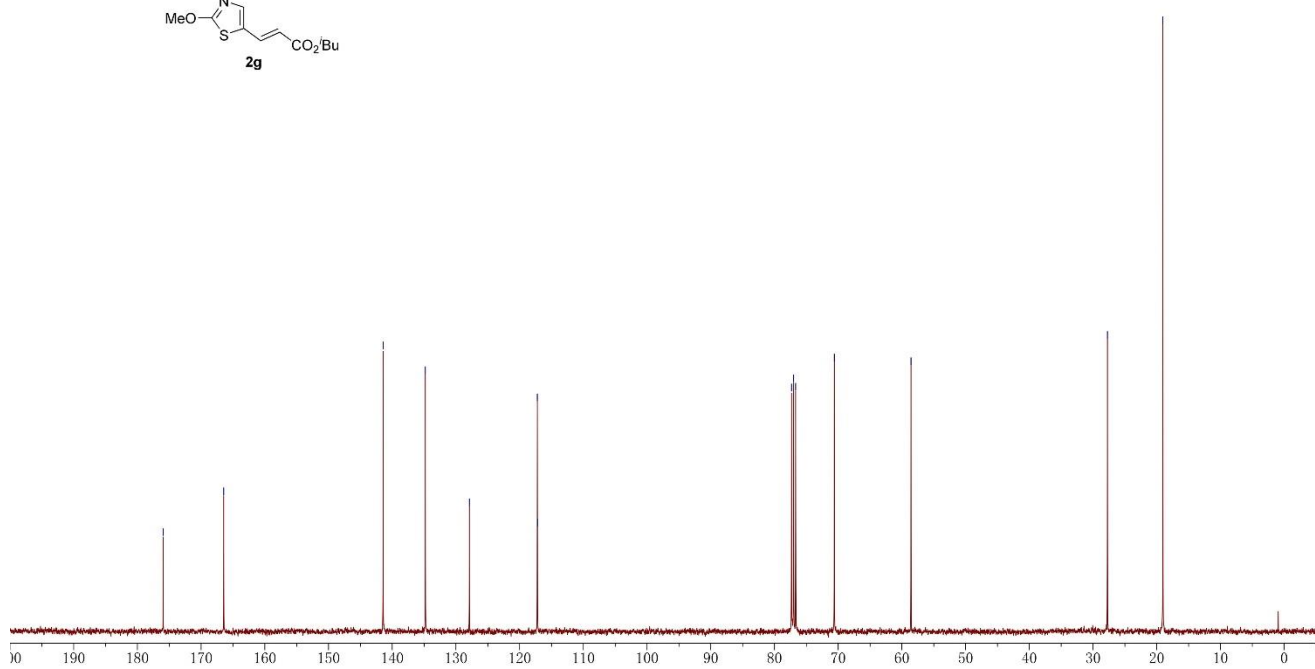

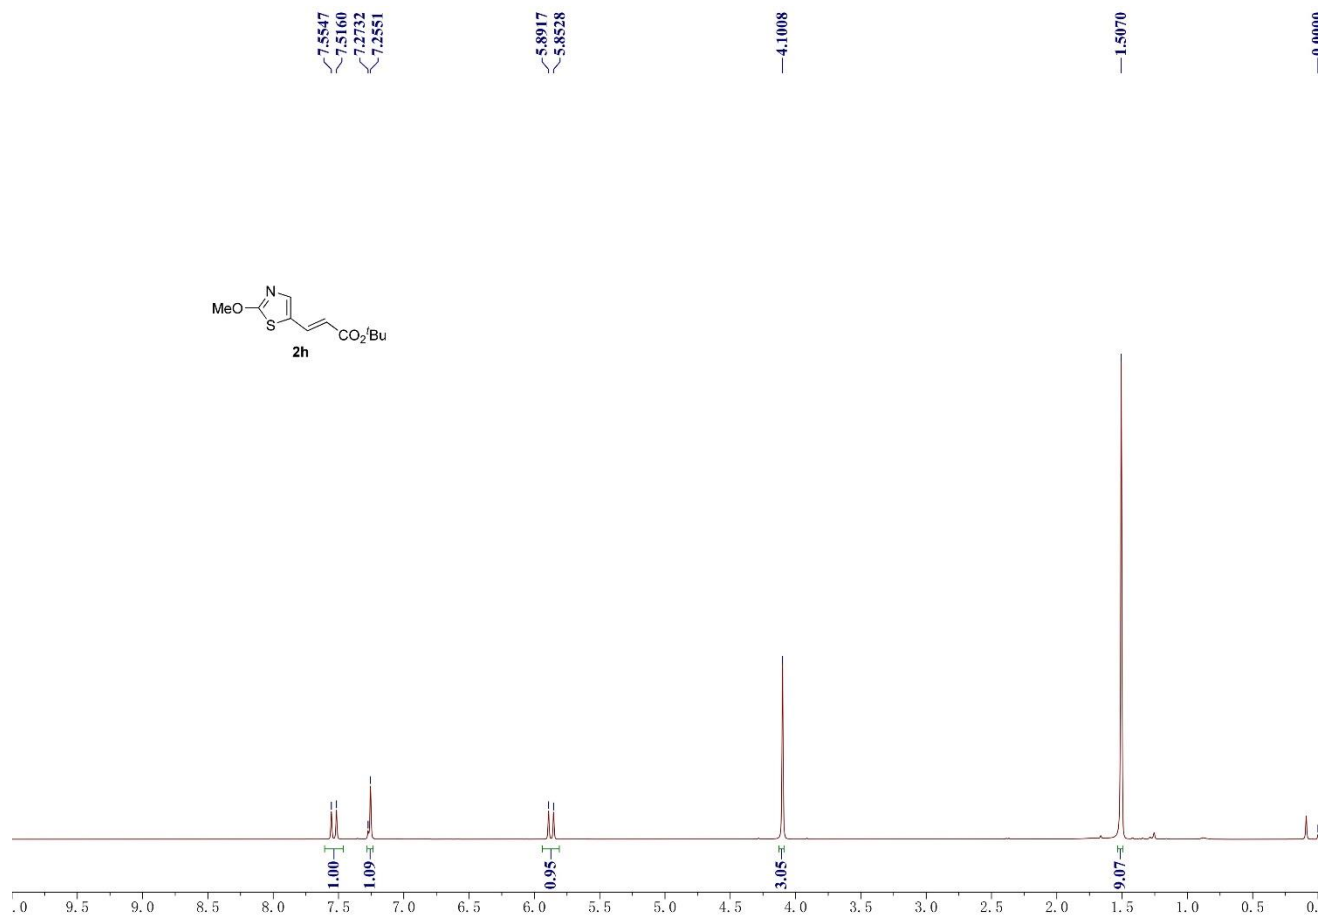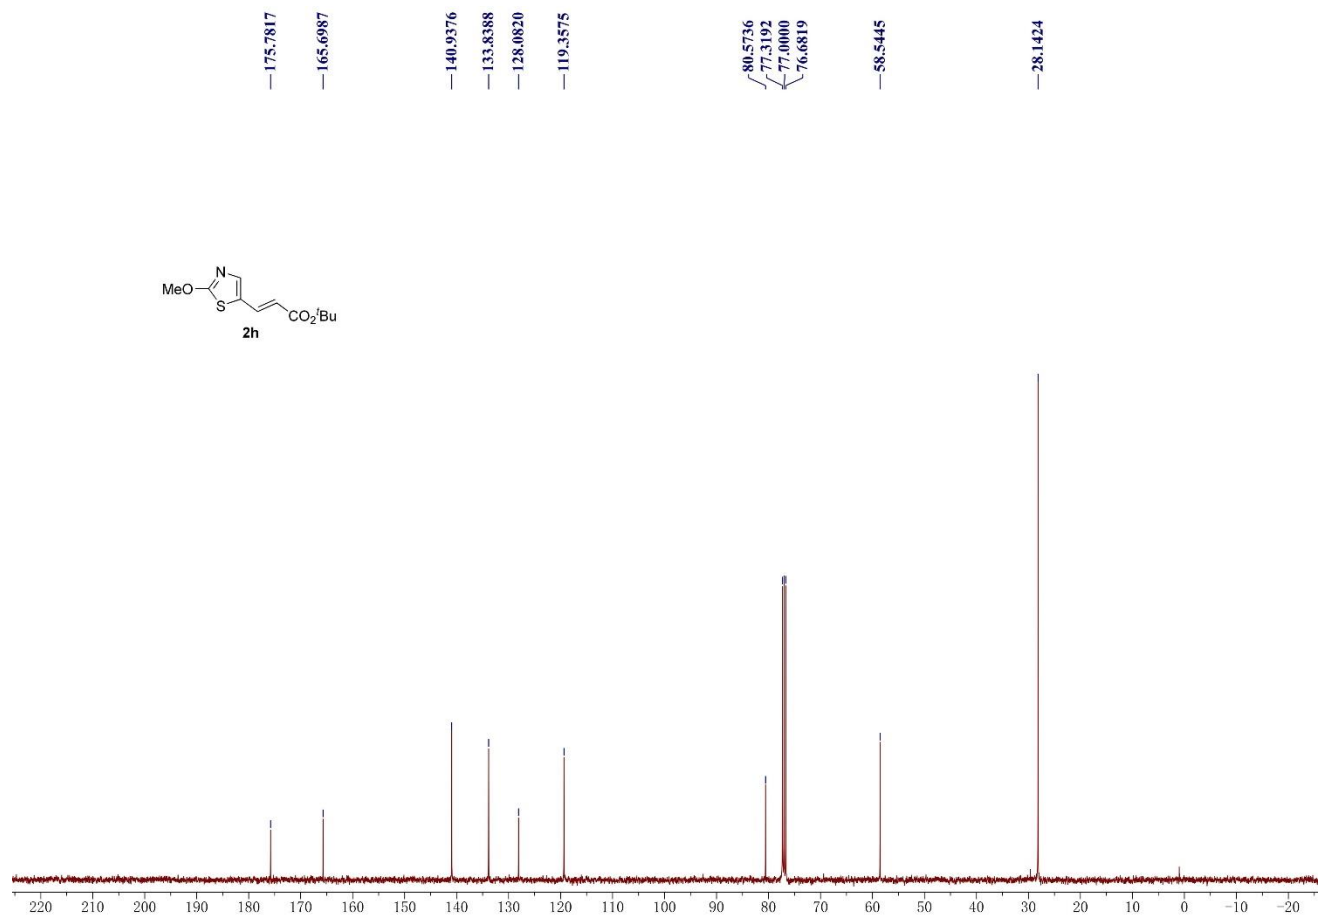

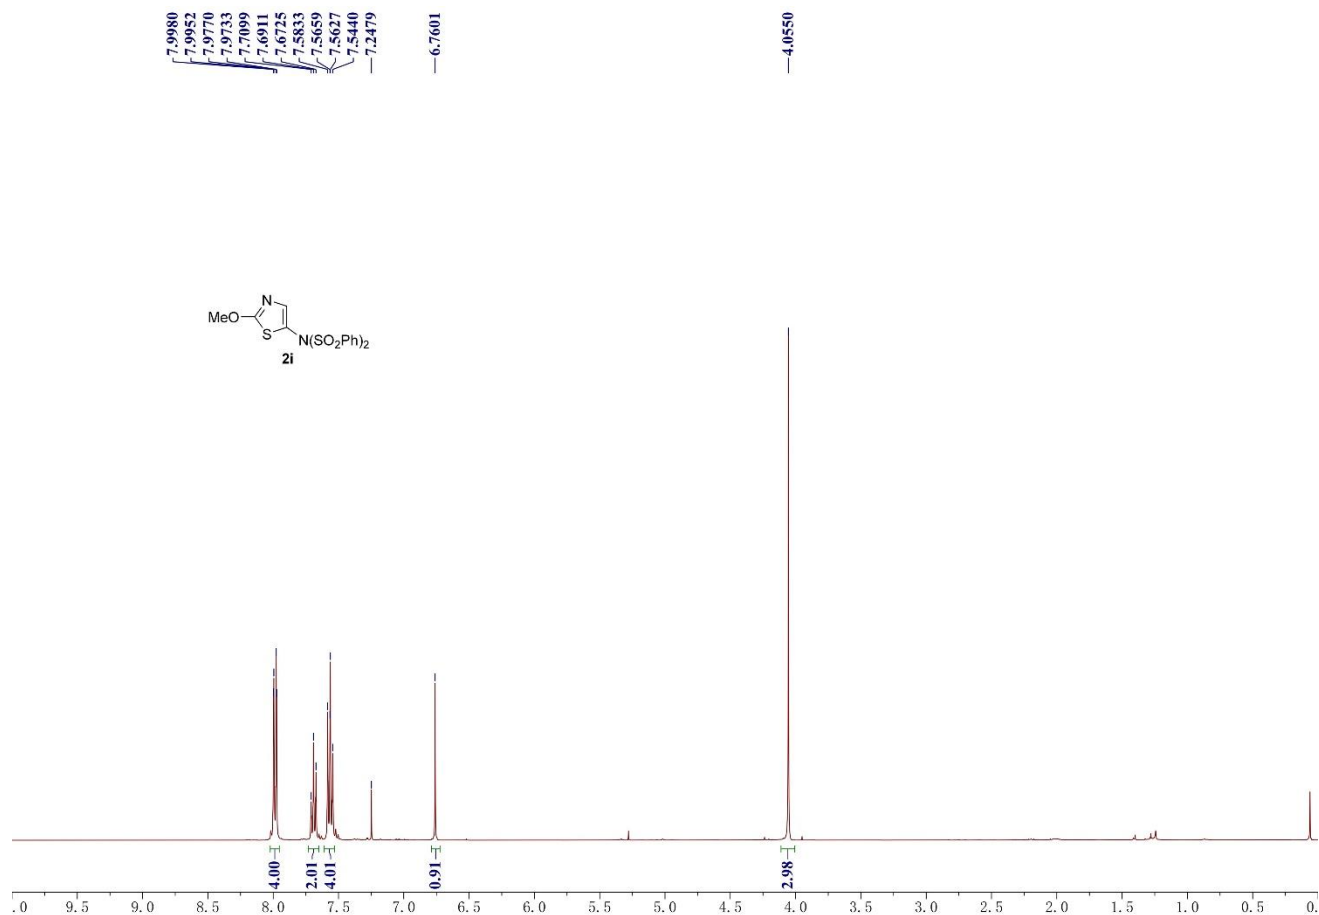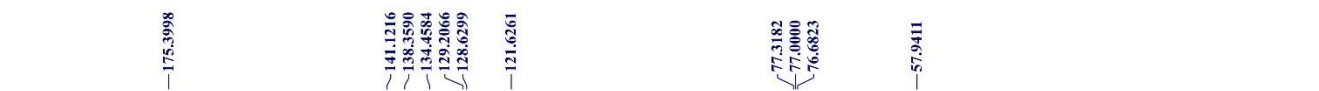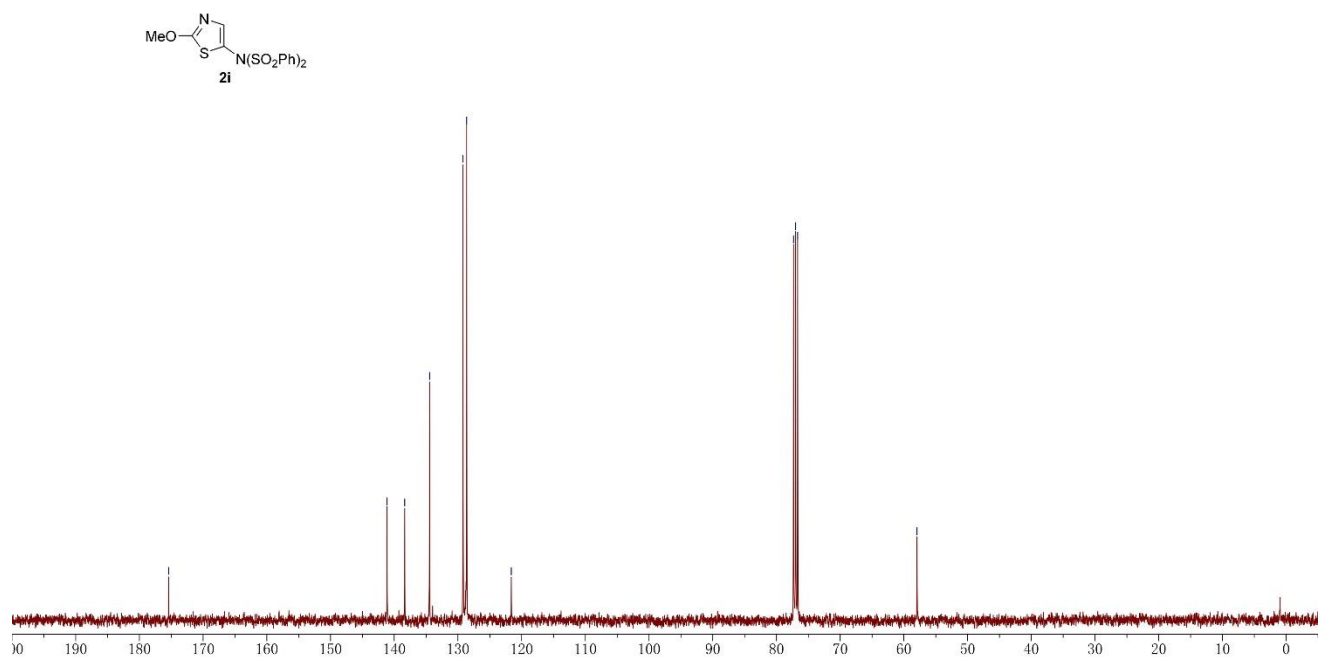

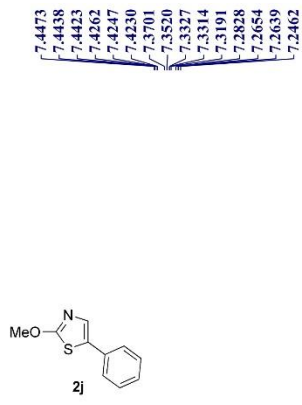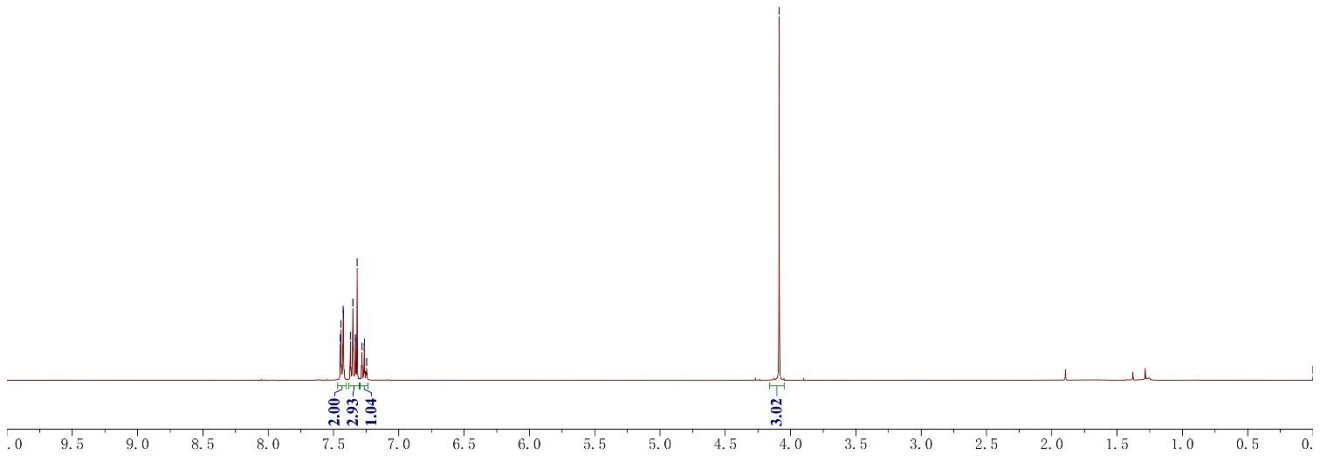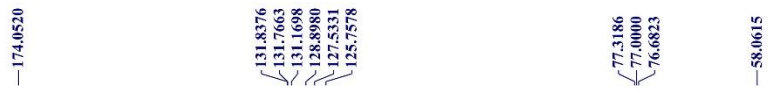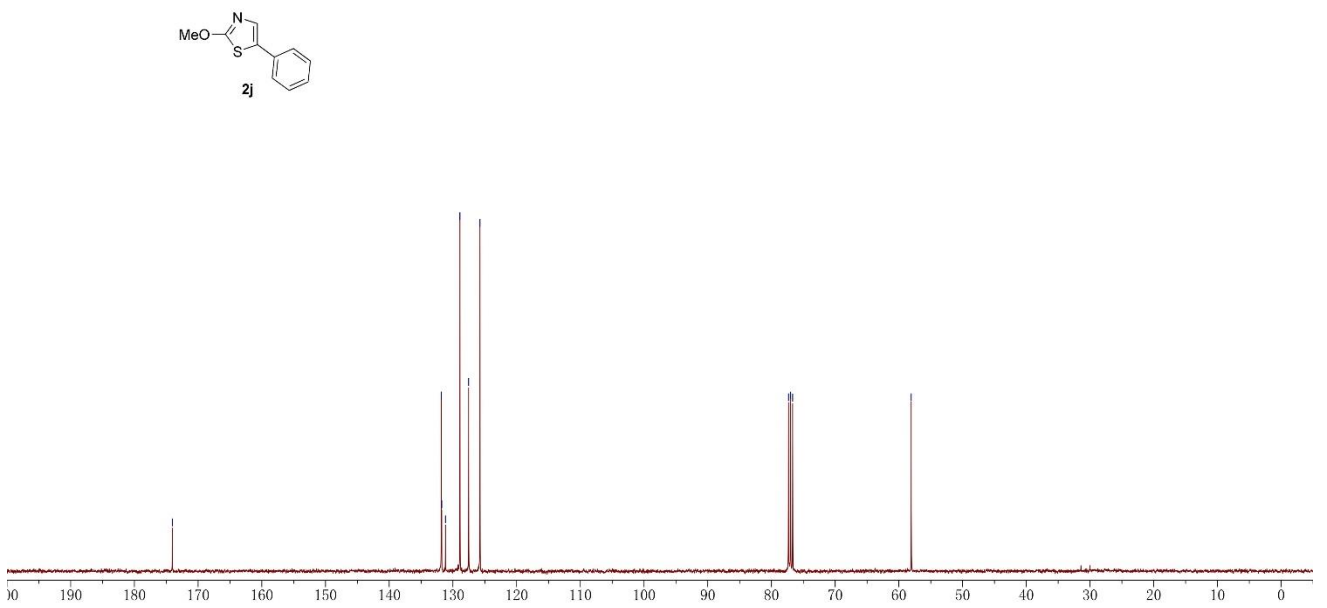



7.3429  
7.3209  
7.2521  
7.0301  
6.9218  
6.8818  
6.8682  
6.8463  
6.5668  
6.5269

4.0640  
3.7970

0.0000

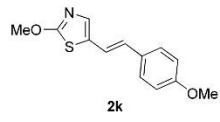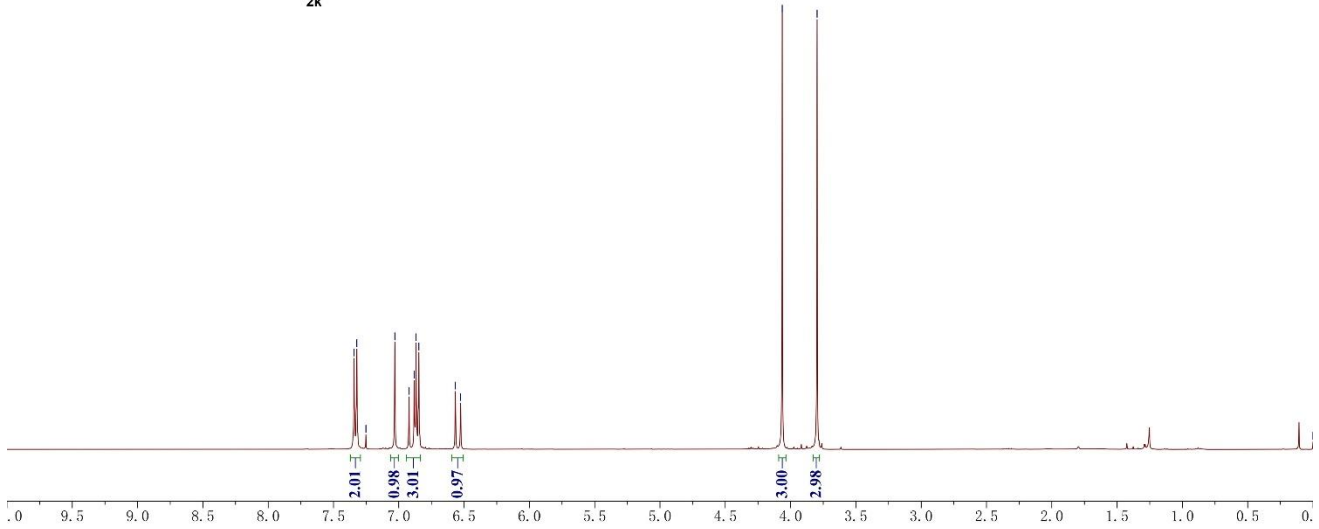

173.0850

159.2854

134.8718

131.1158

129.4415

128.3592

127.3404

117.1240

114.1124

77.3171

77.0000

76.6811

58.0673

55.2164

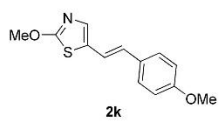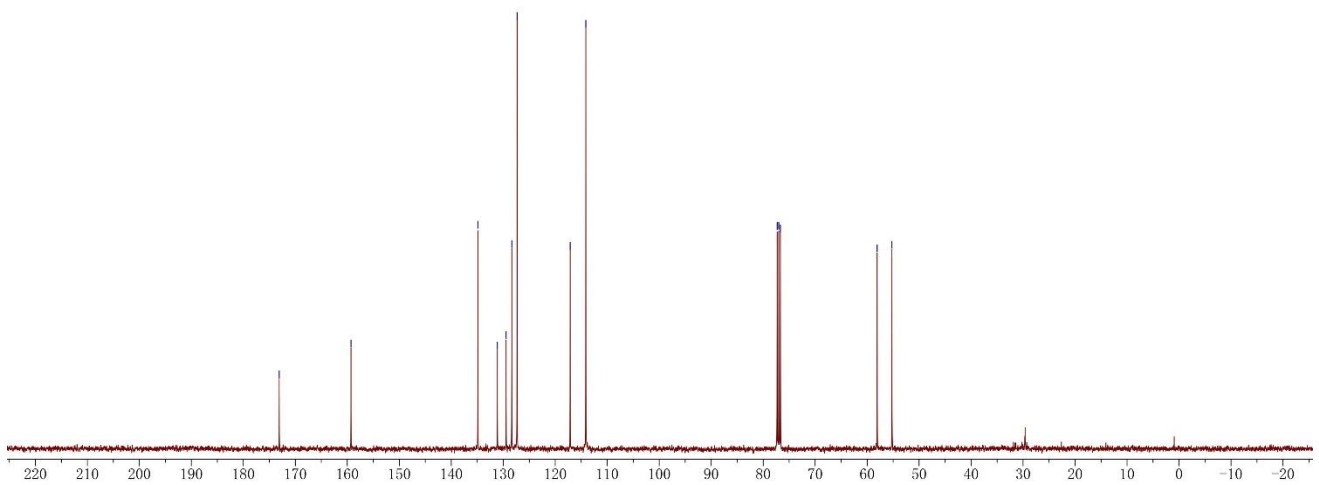

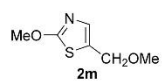

7.2784  
7.0229  
7.0206  
7.0184

4.4732  
4.4710

4.0600

3.3457

0.0000

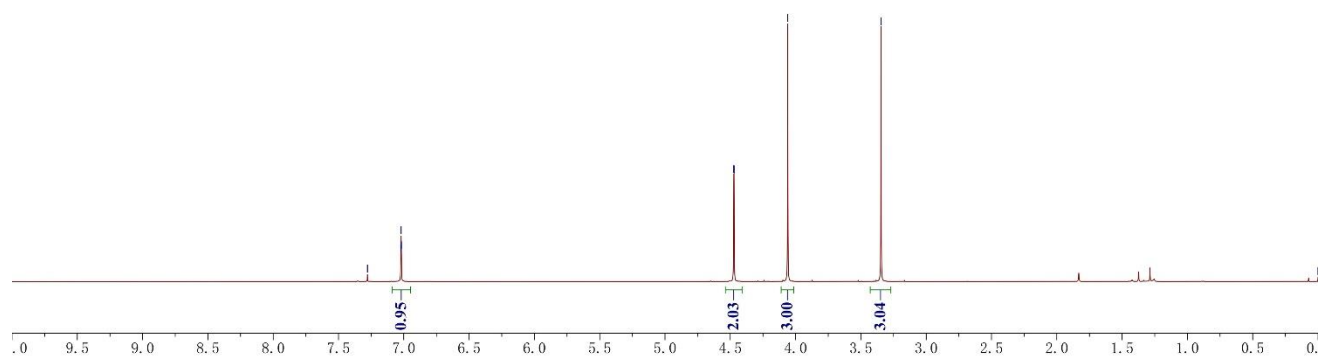

175.8207

135.6320

127.1739

77.3184

77.0000

76.6824

66.9788

58.0859

57.4085

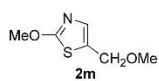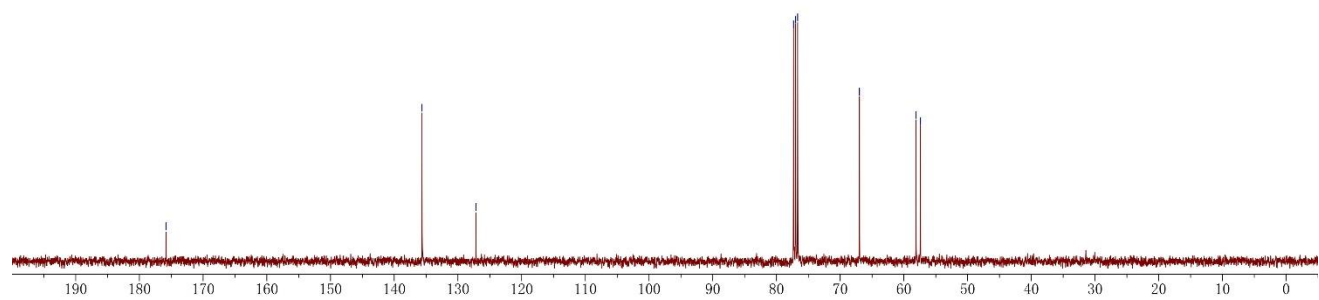

## 7.2 Spectra of Compounds in Table 2

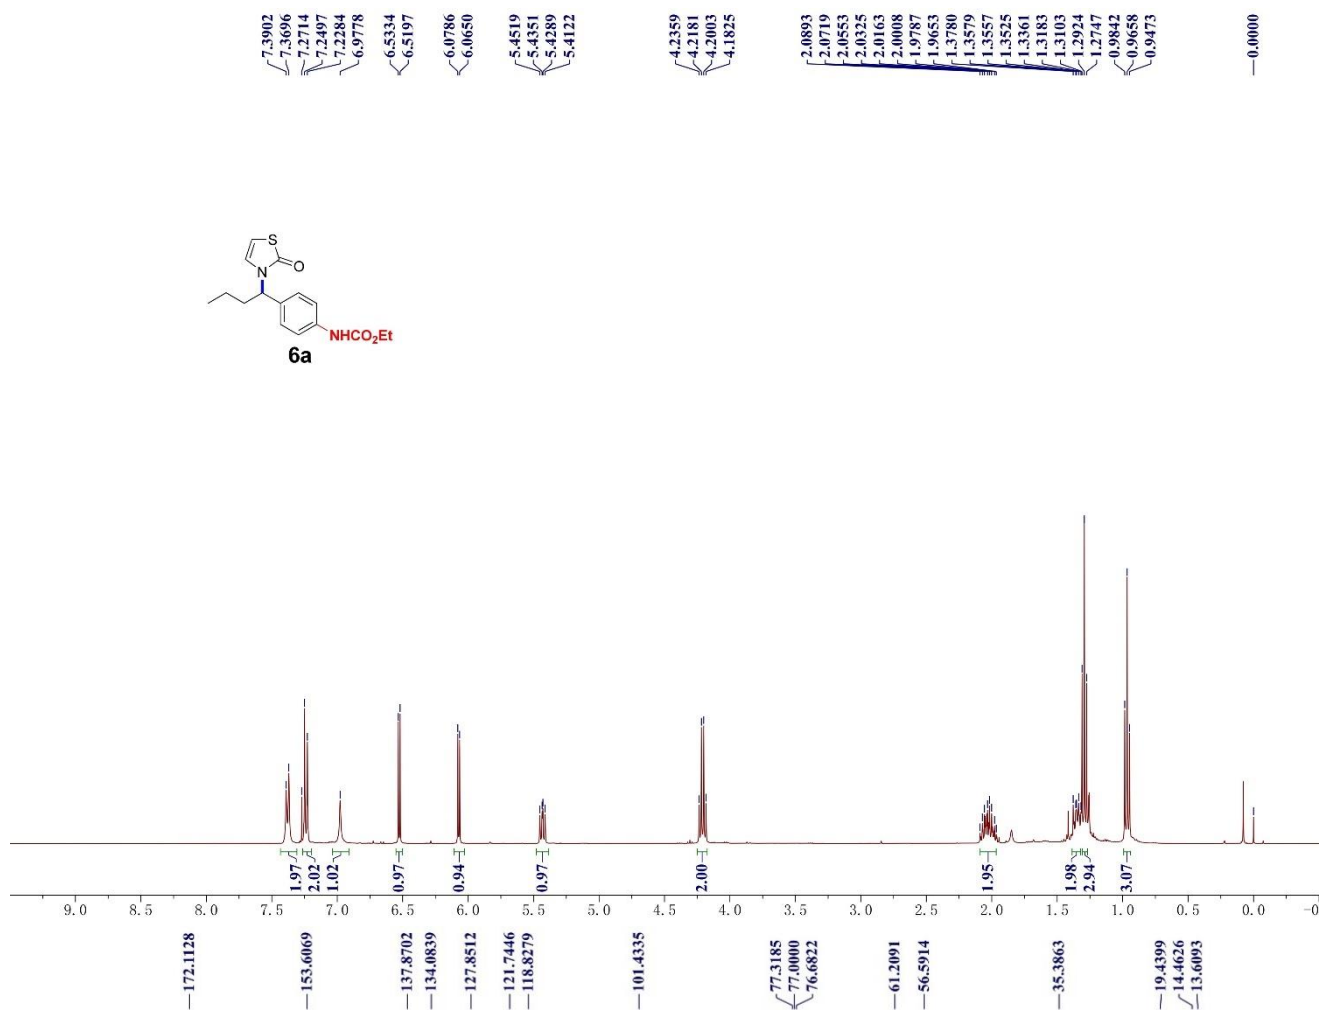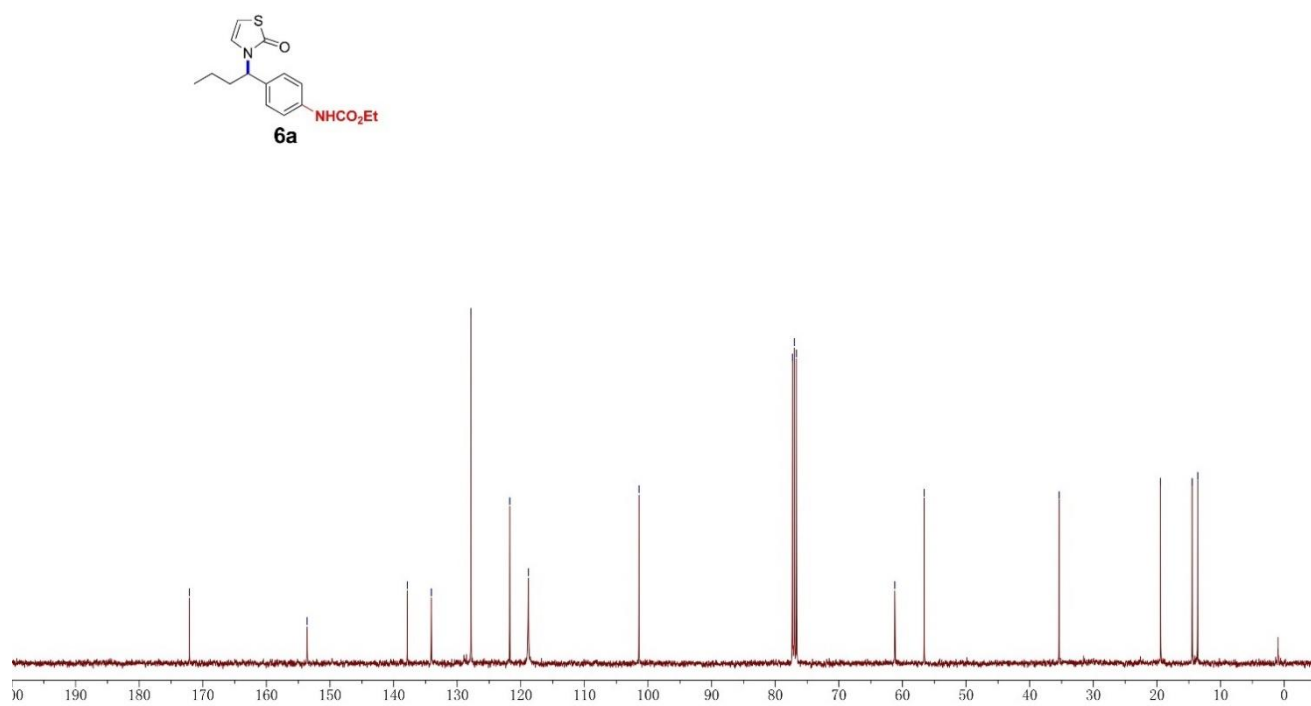

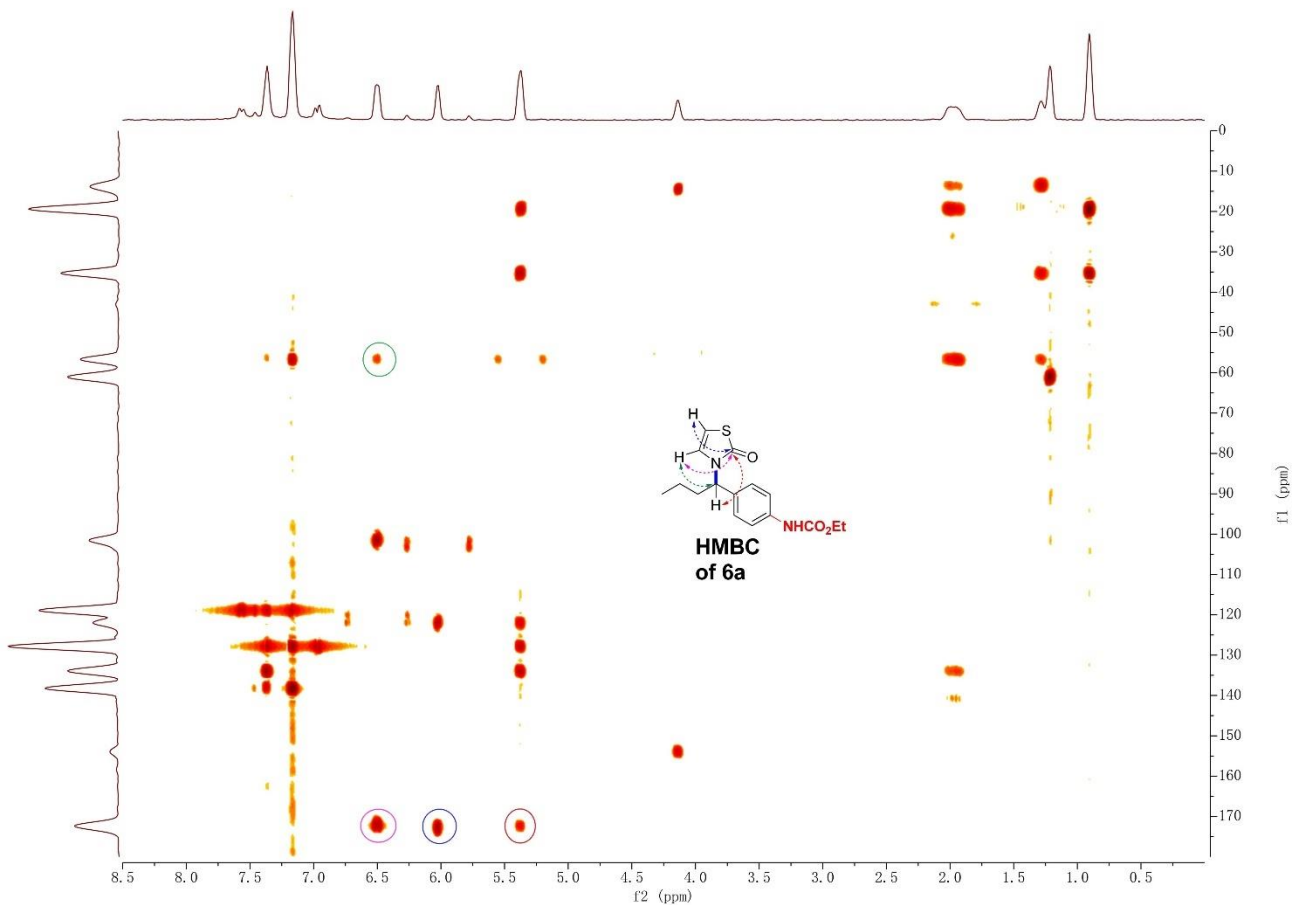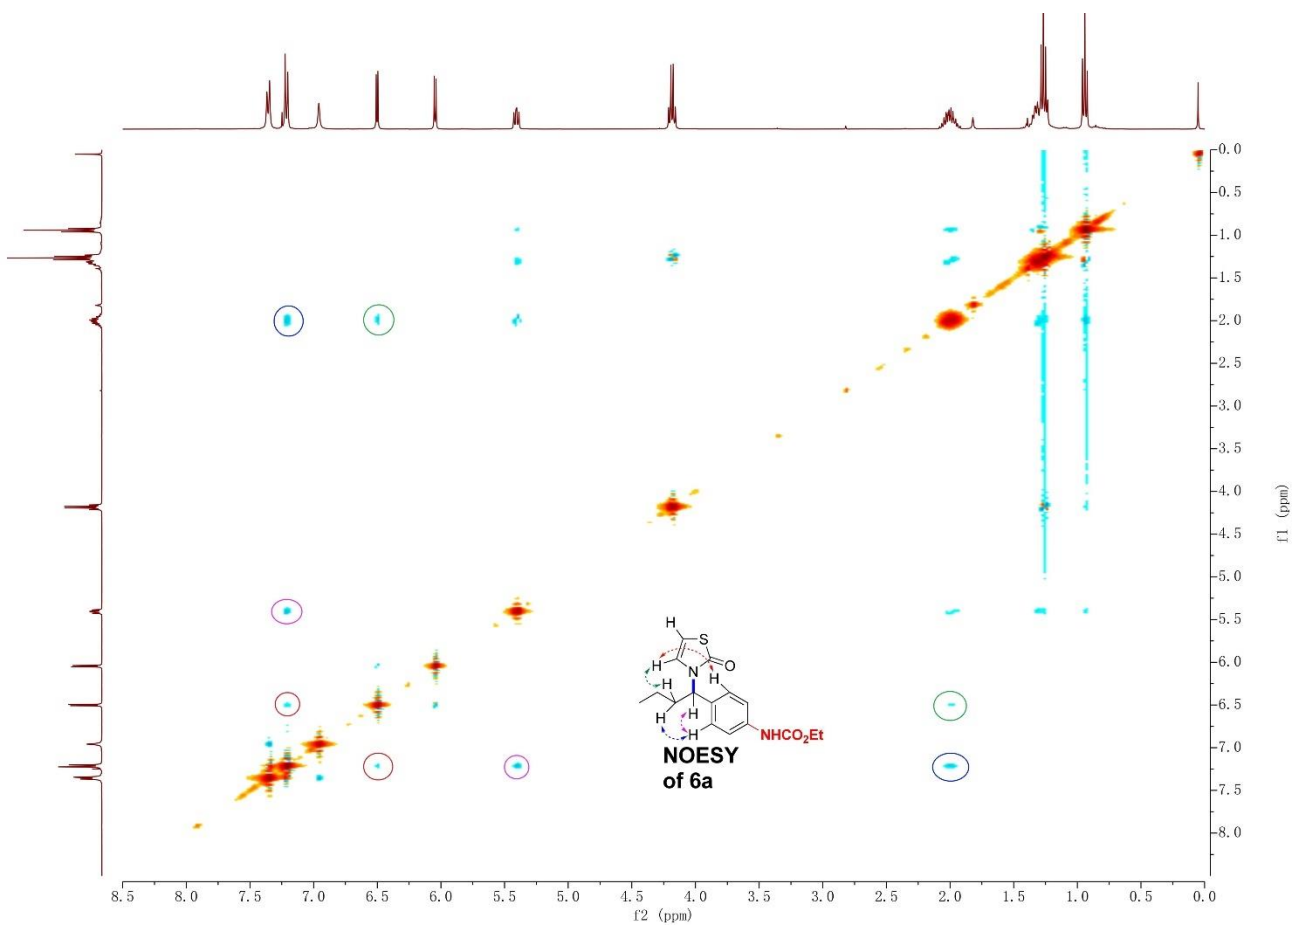

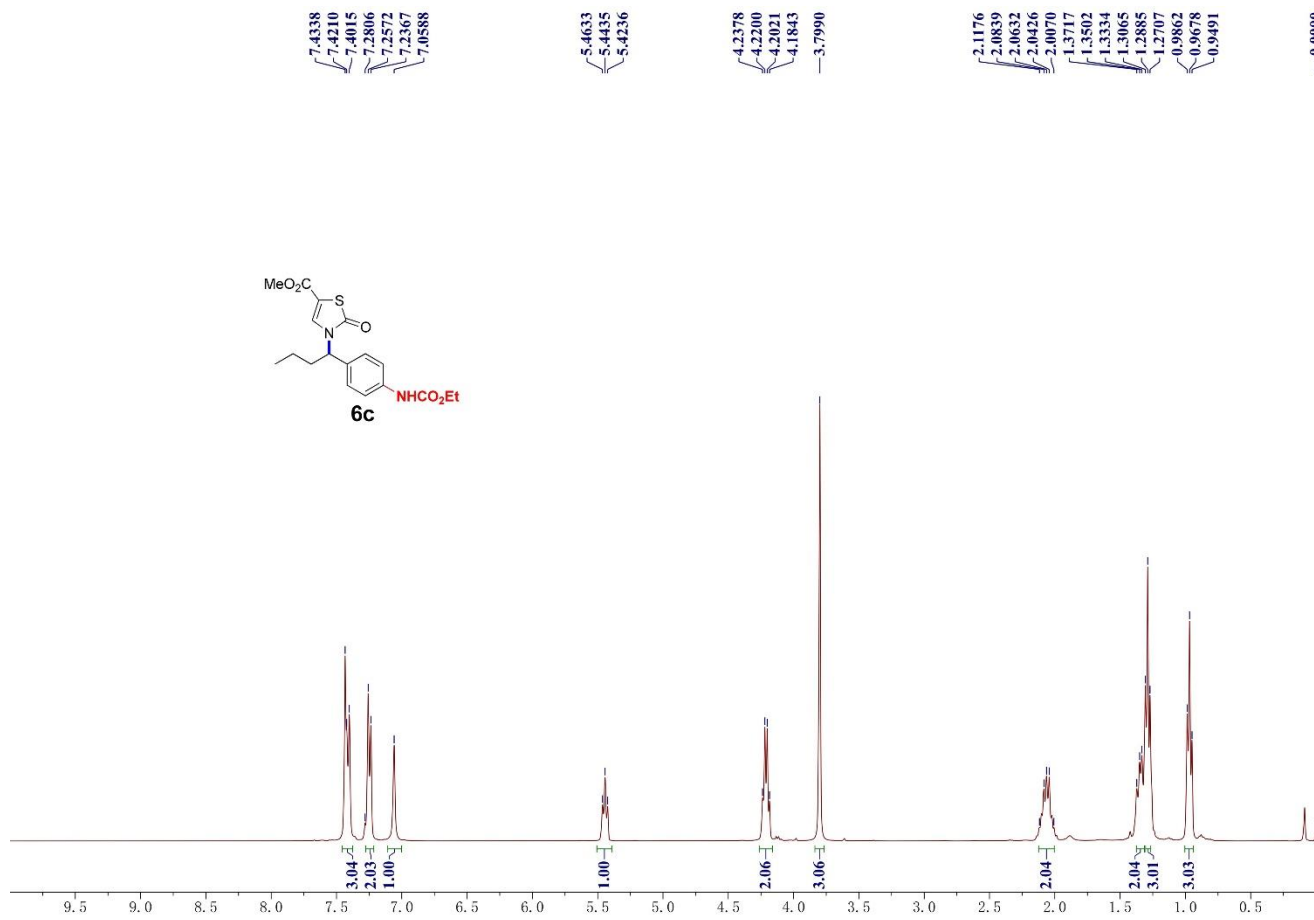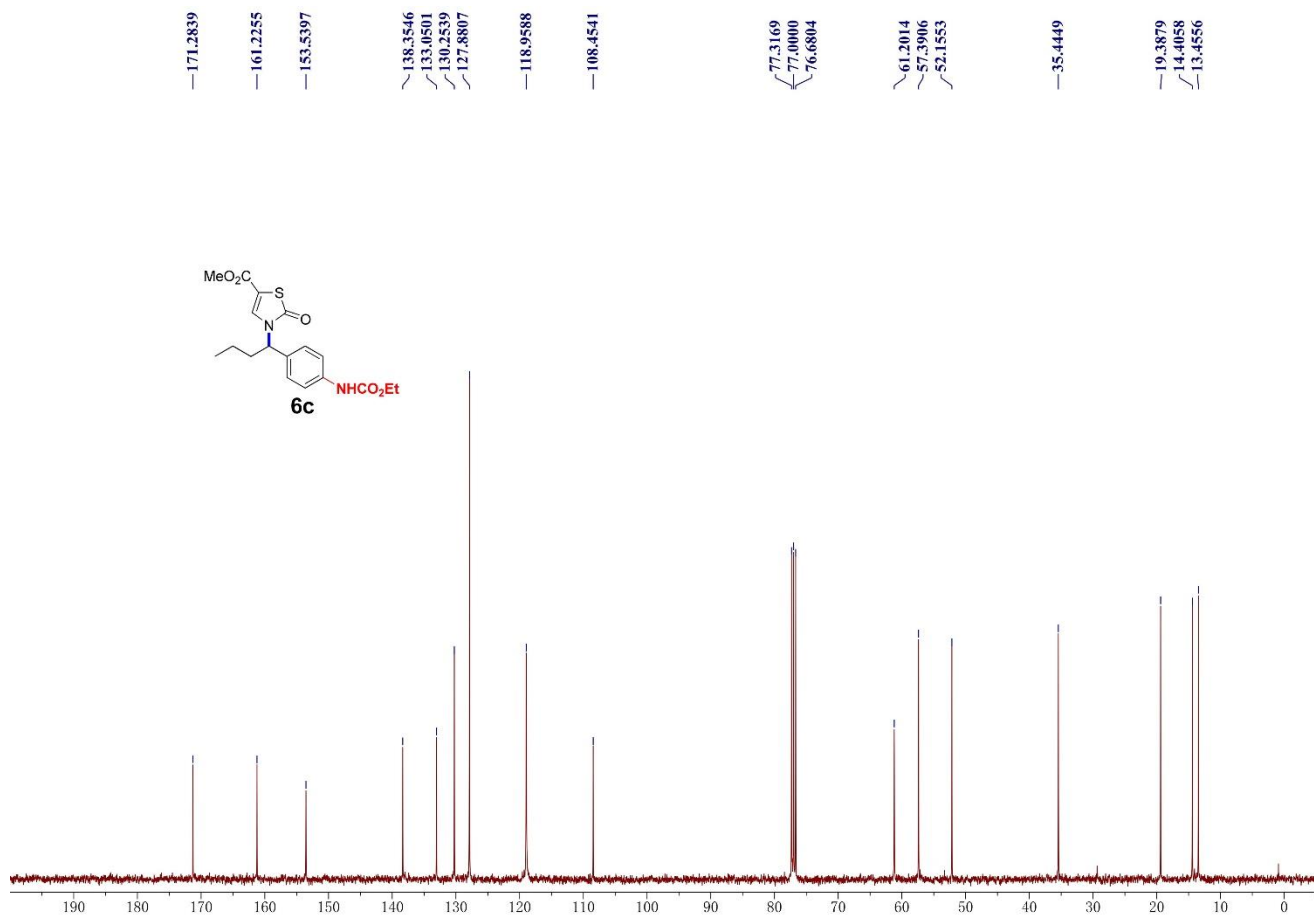

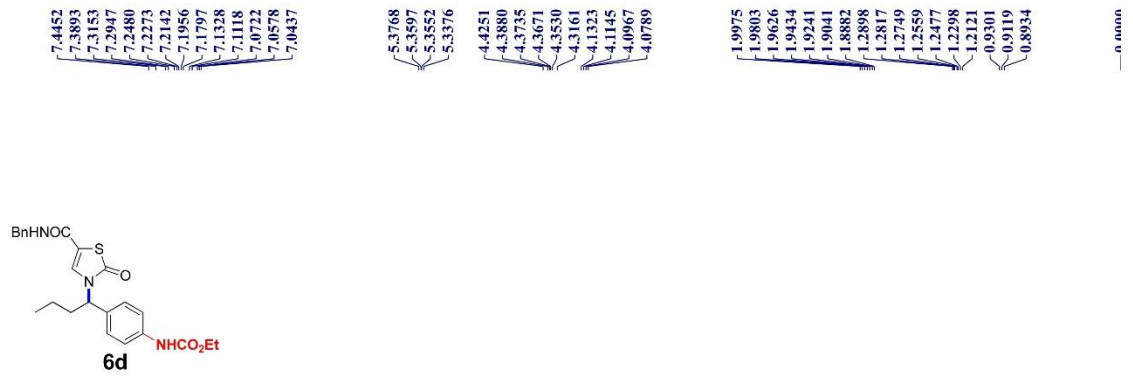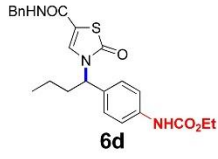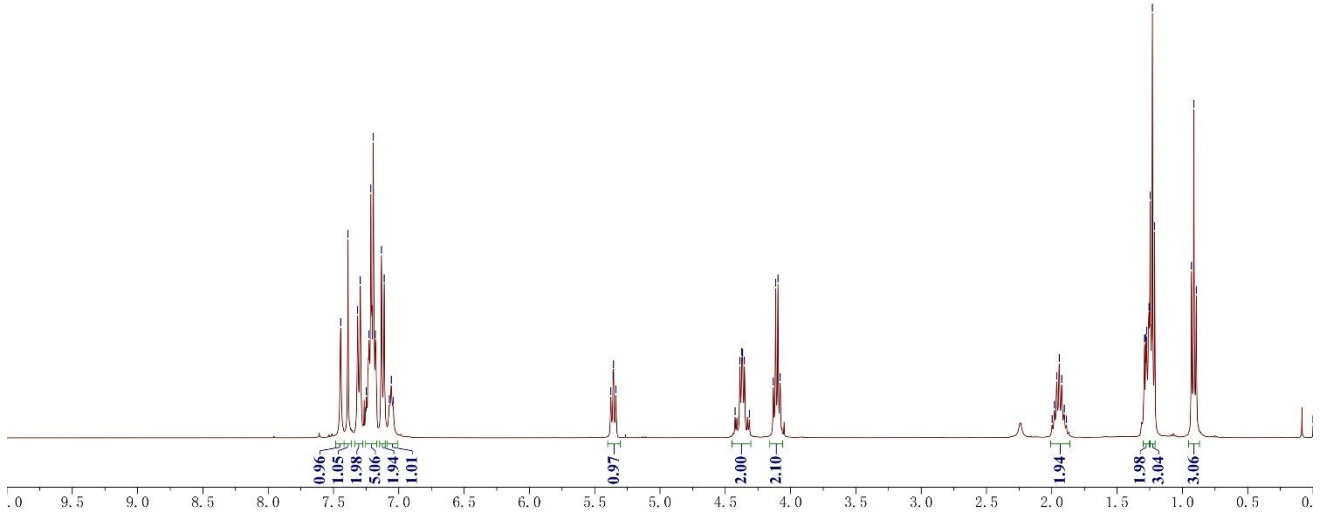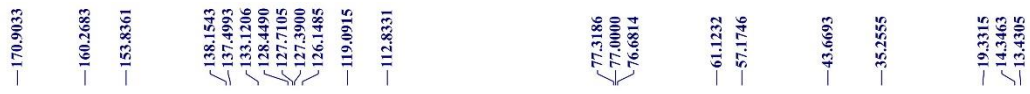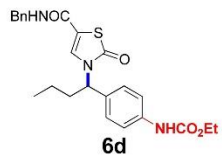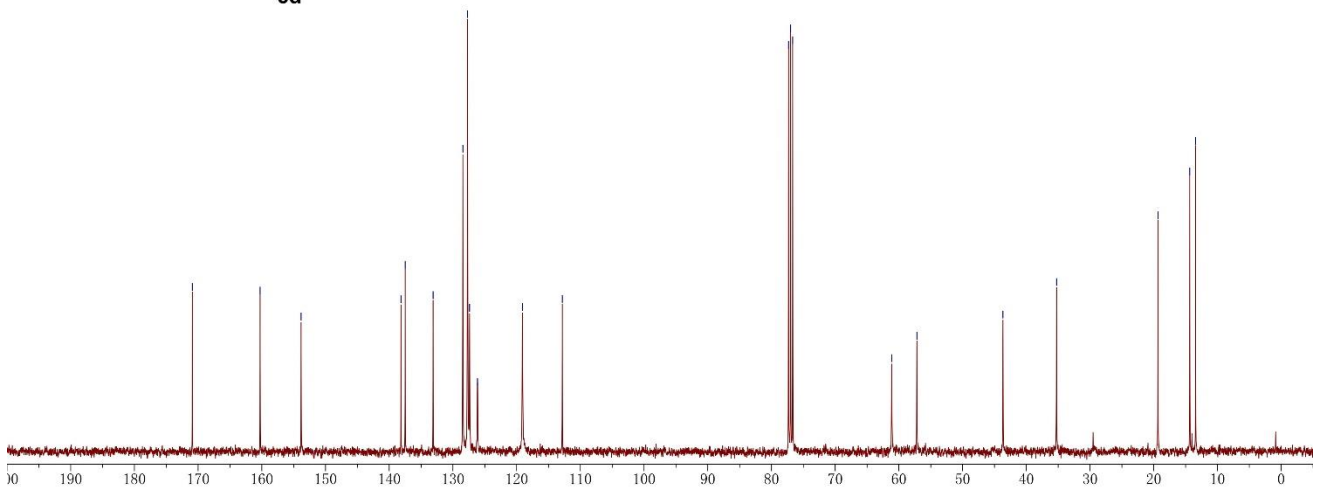

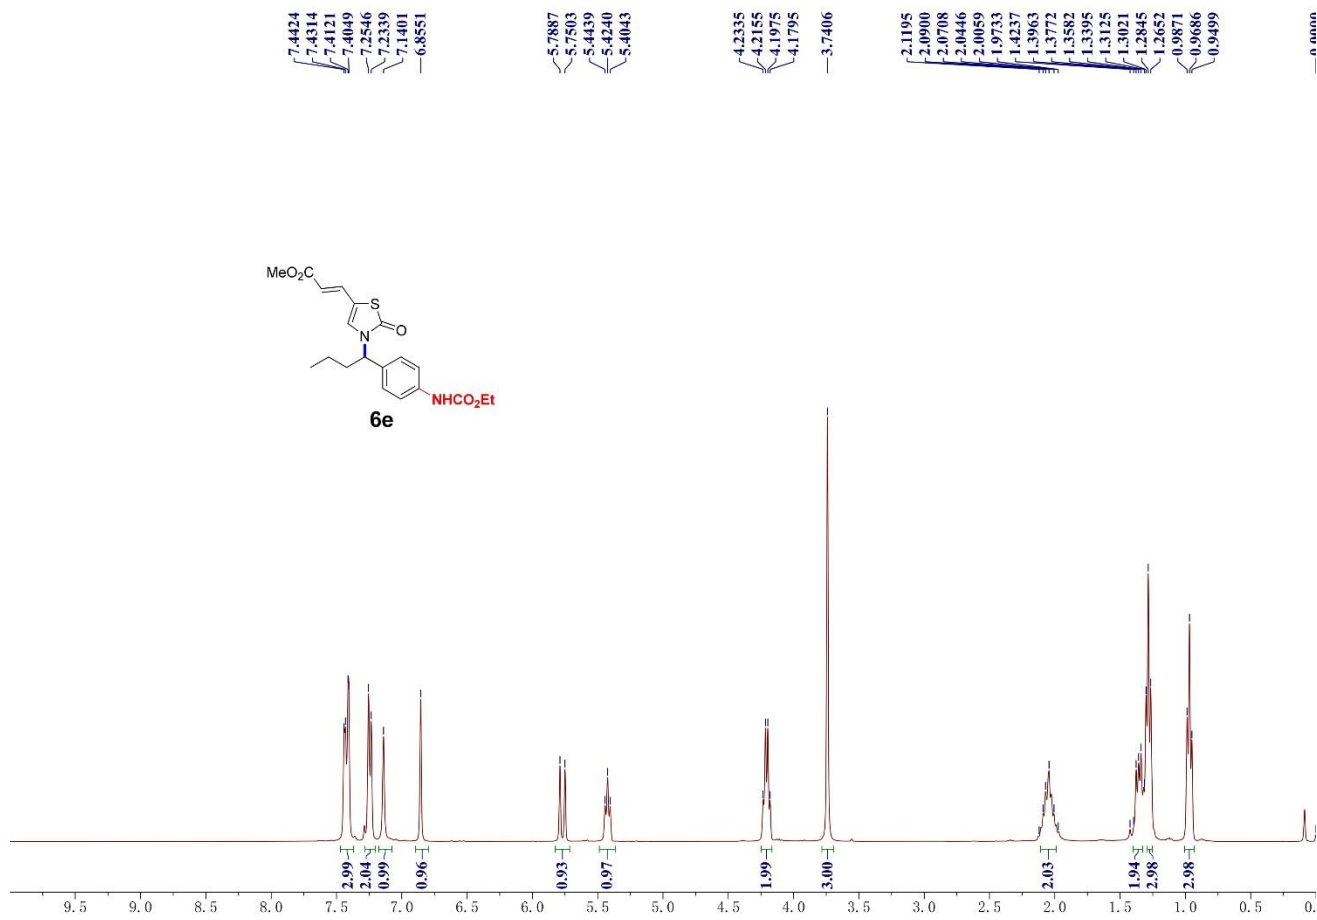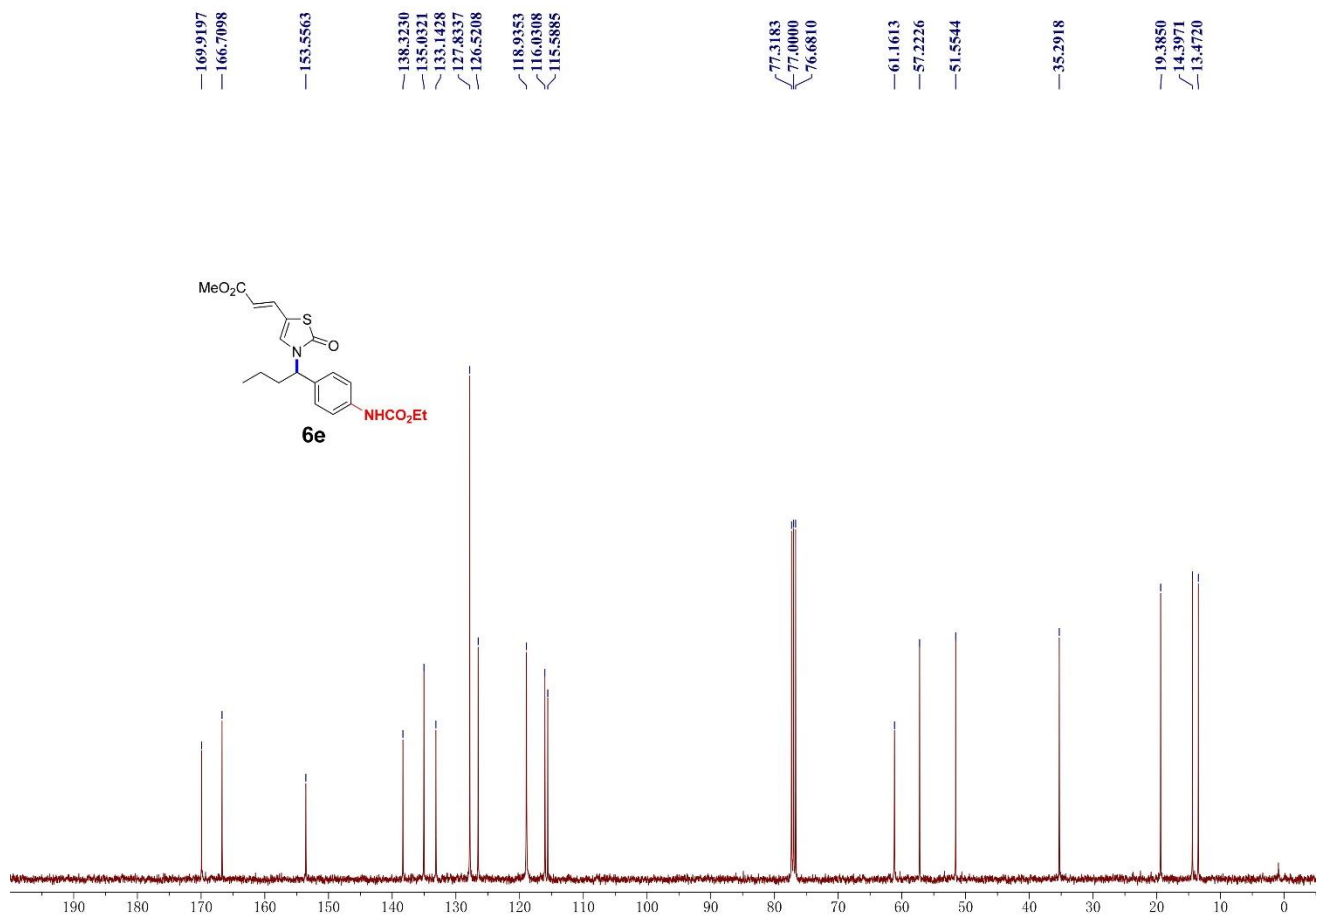

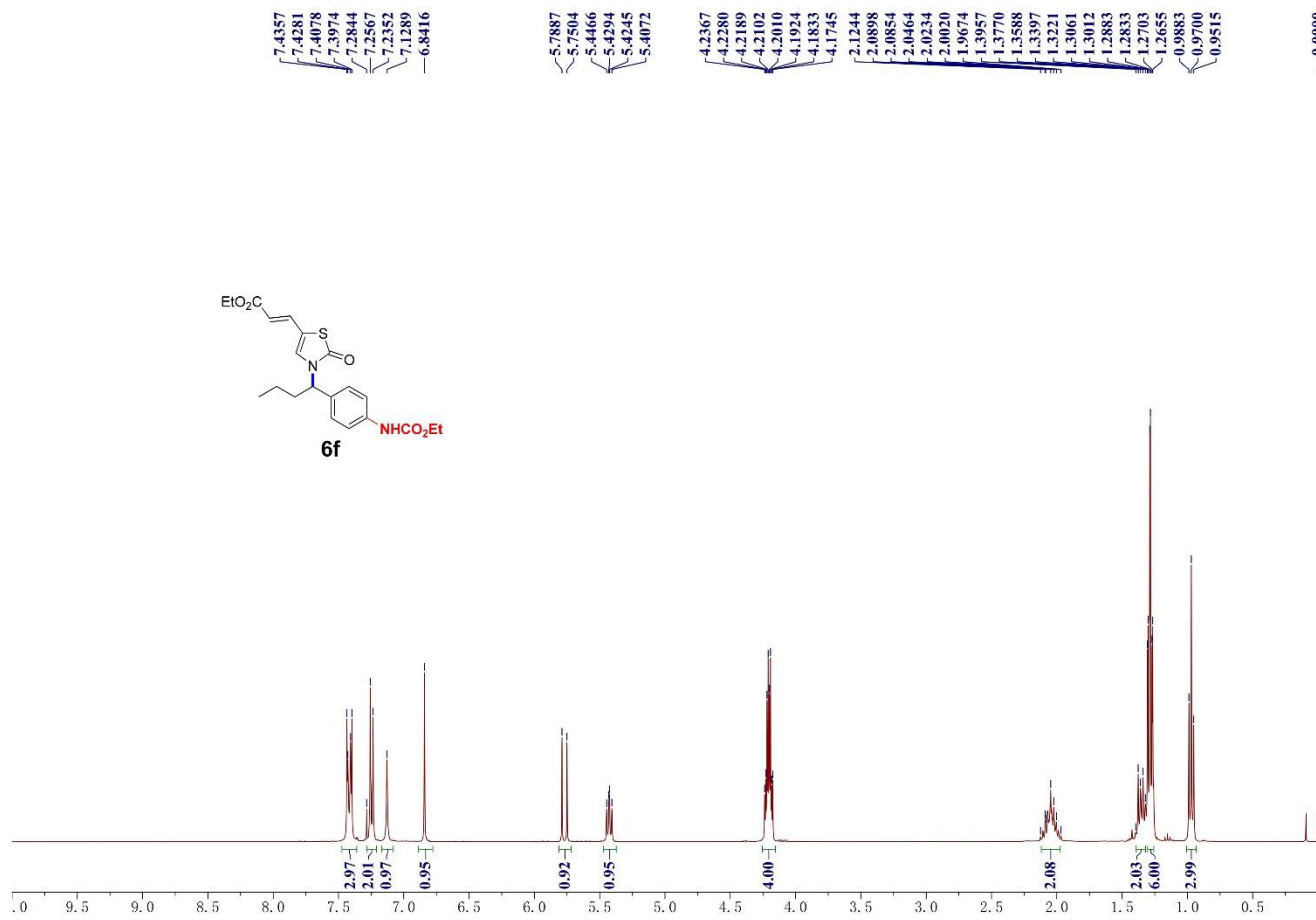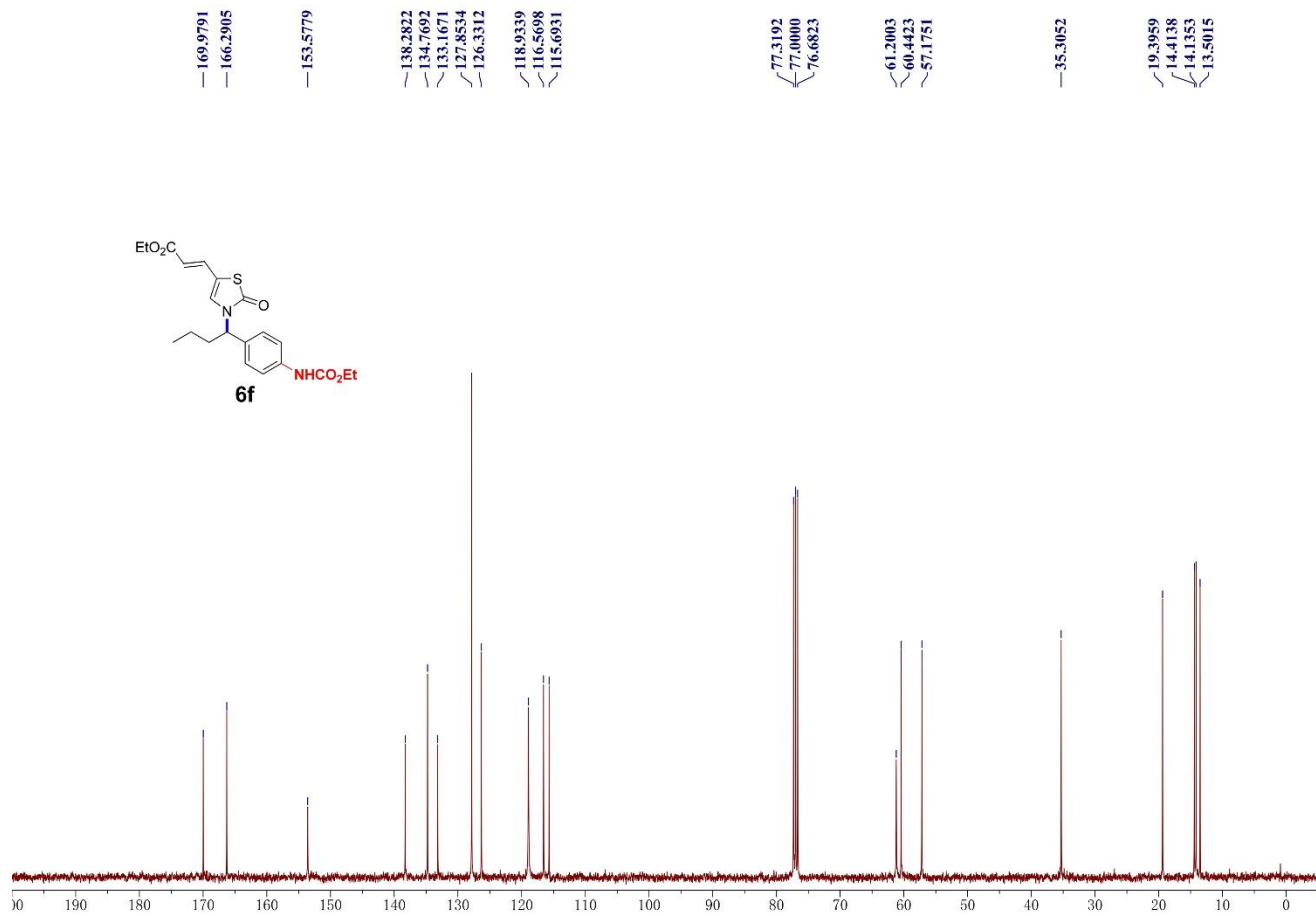



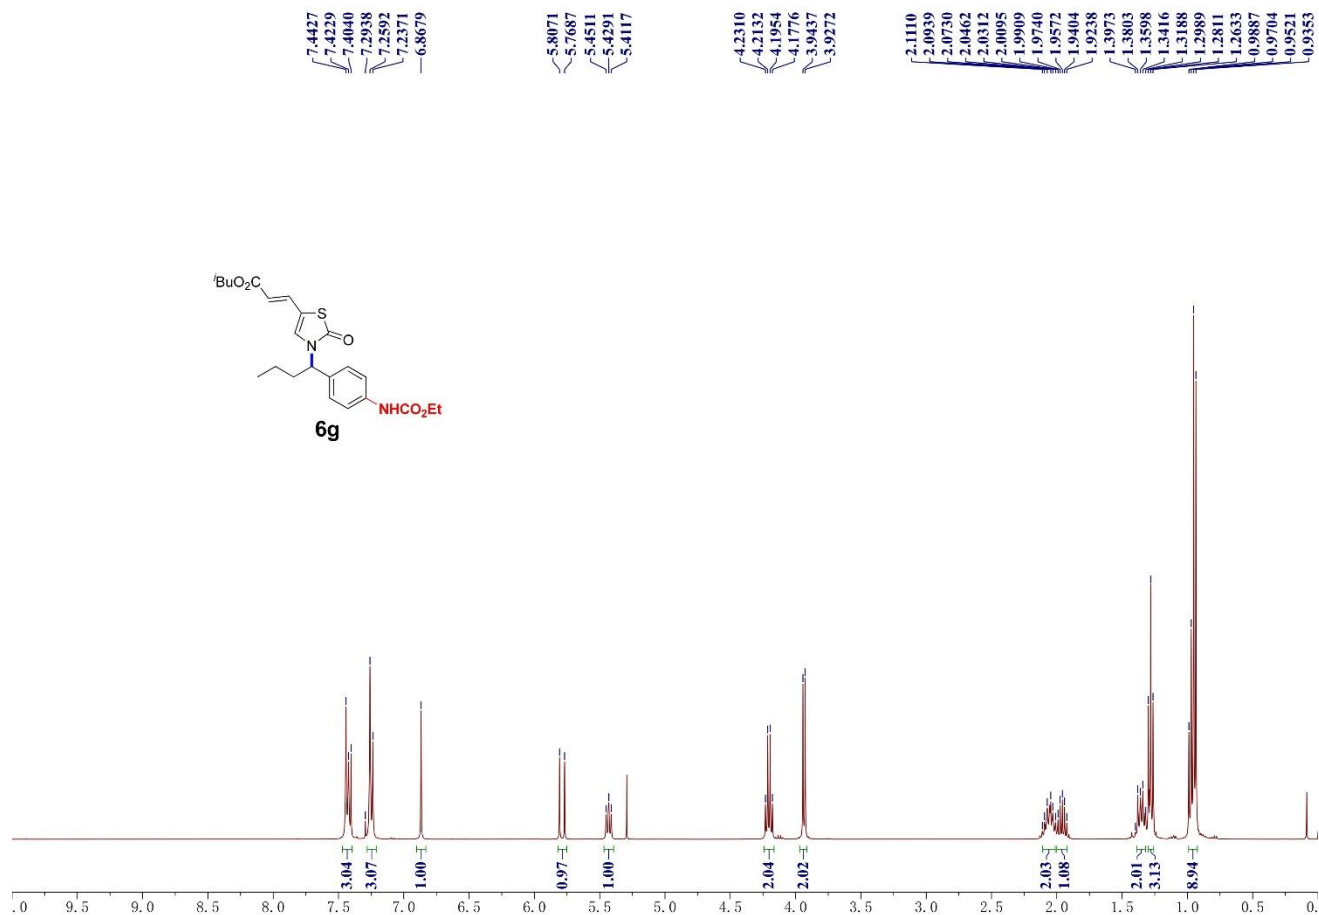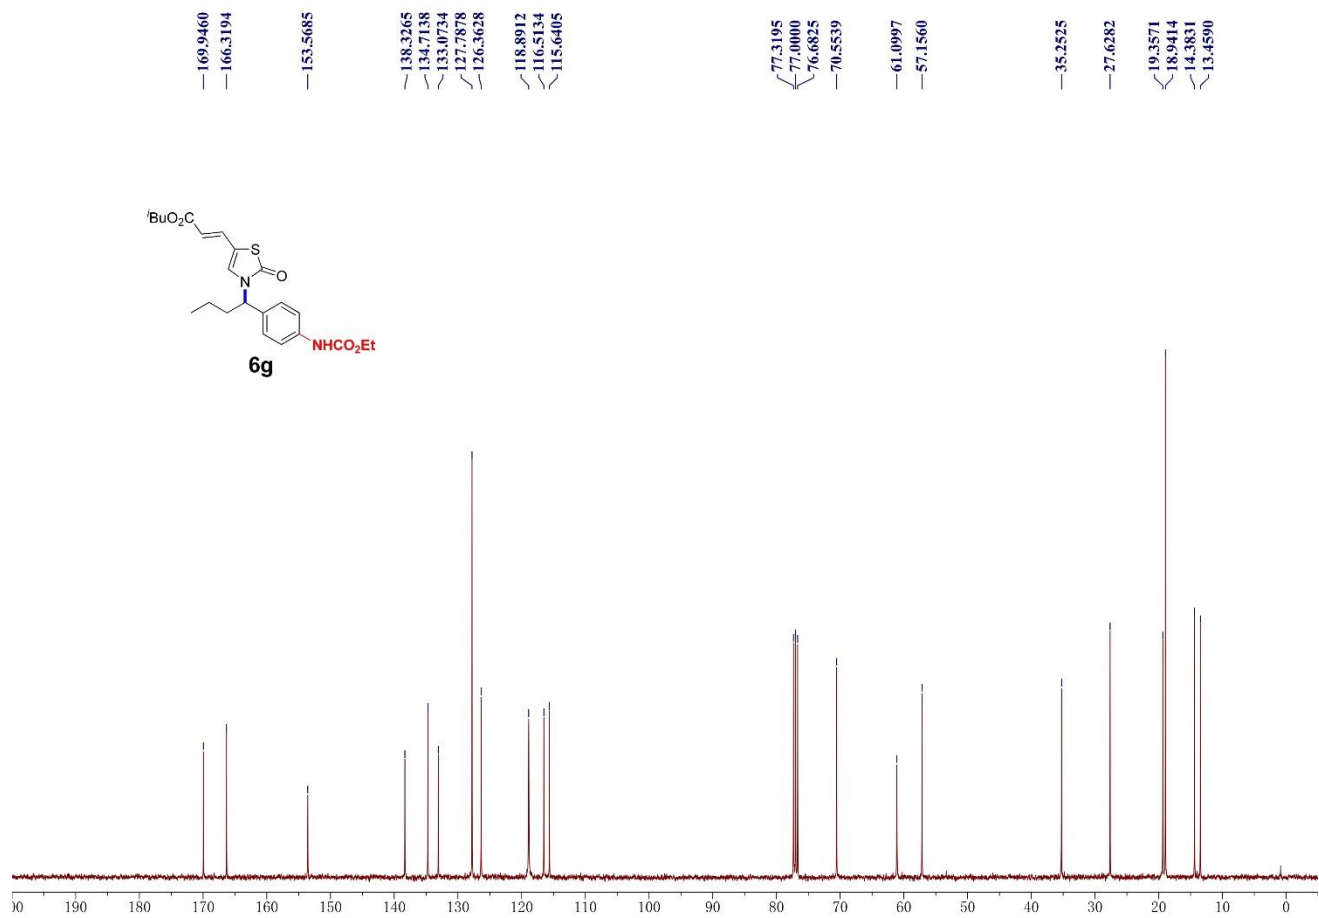

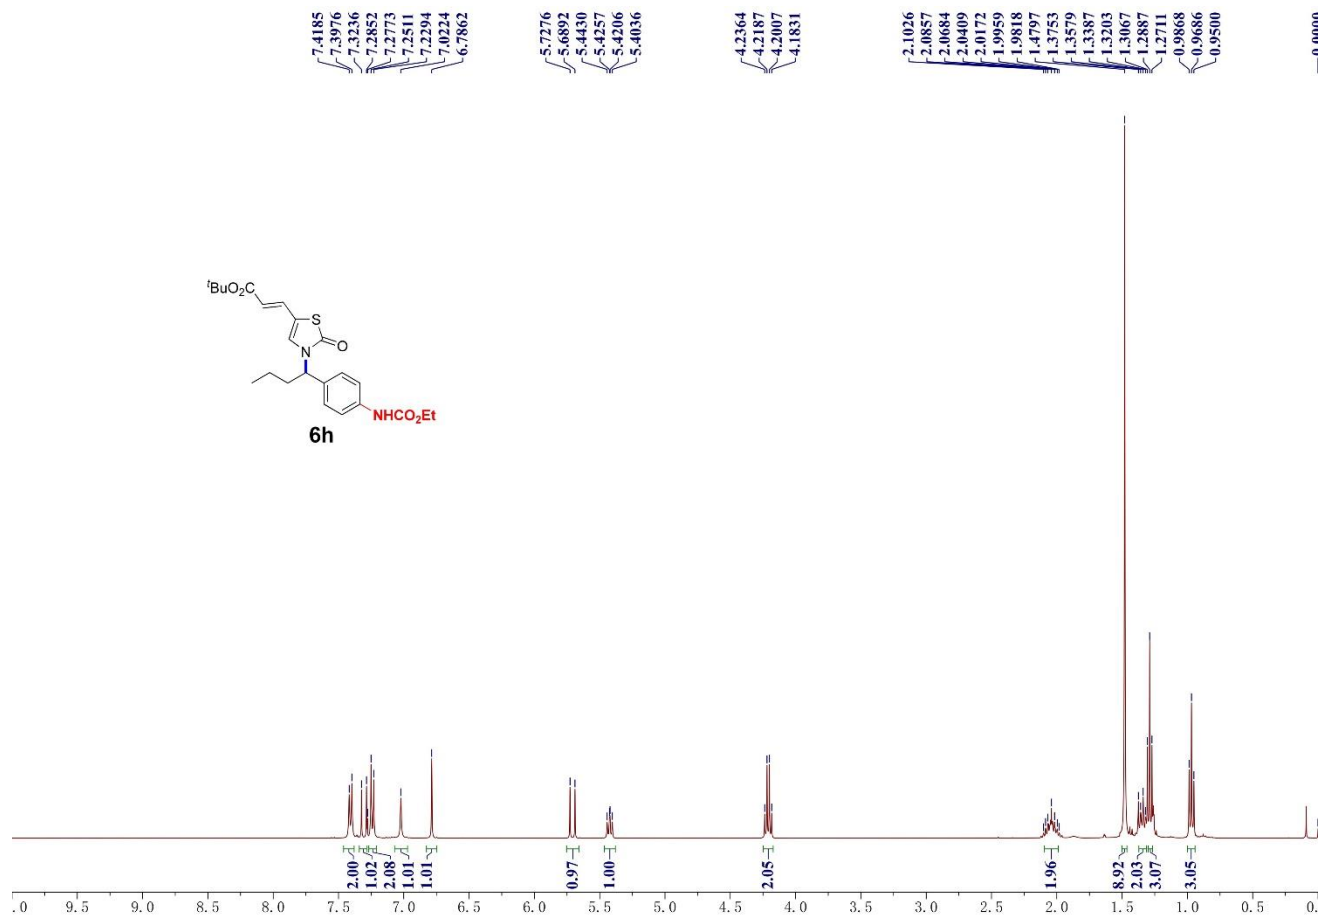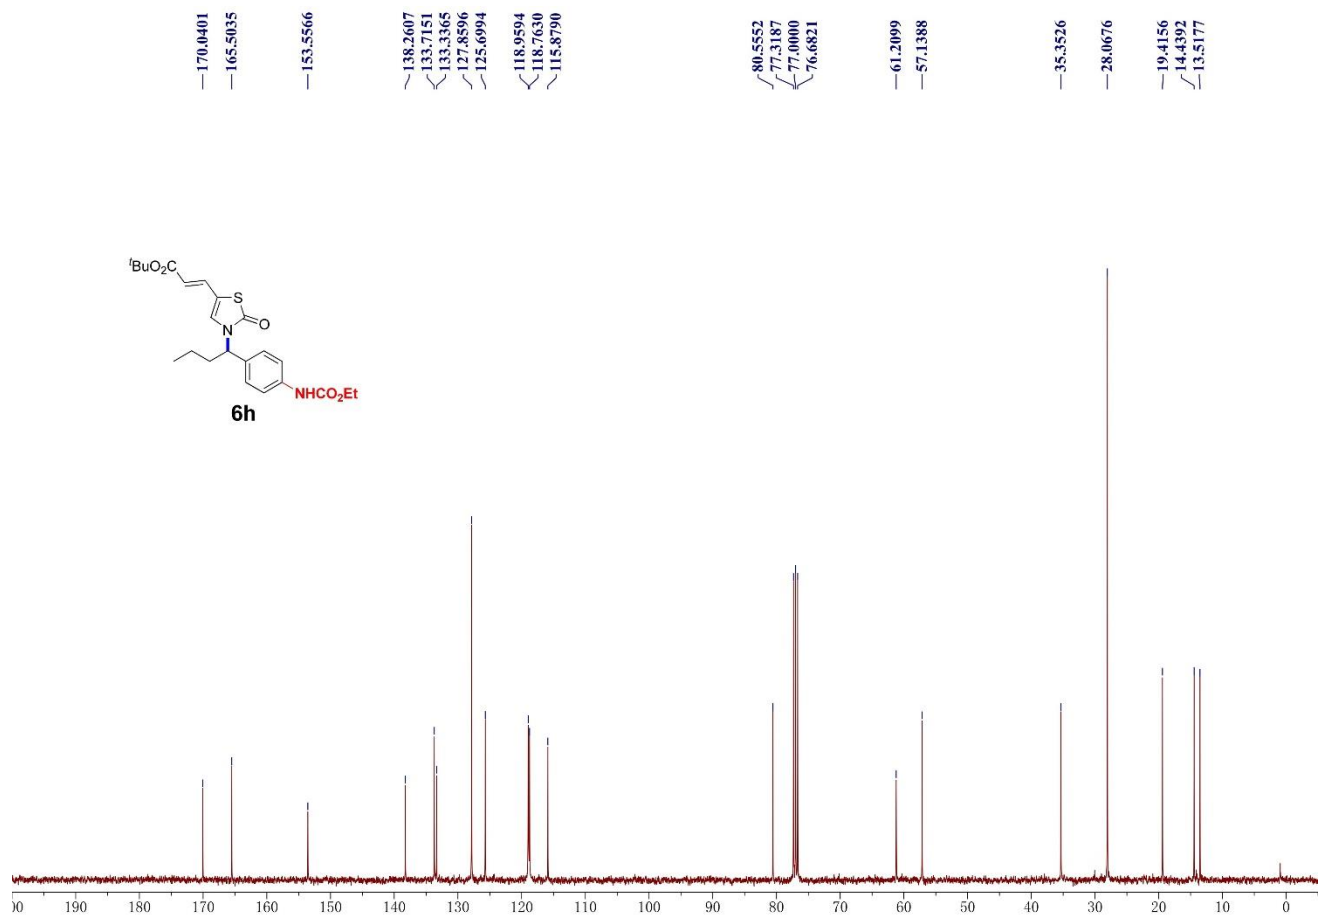

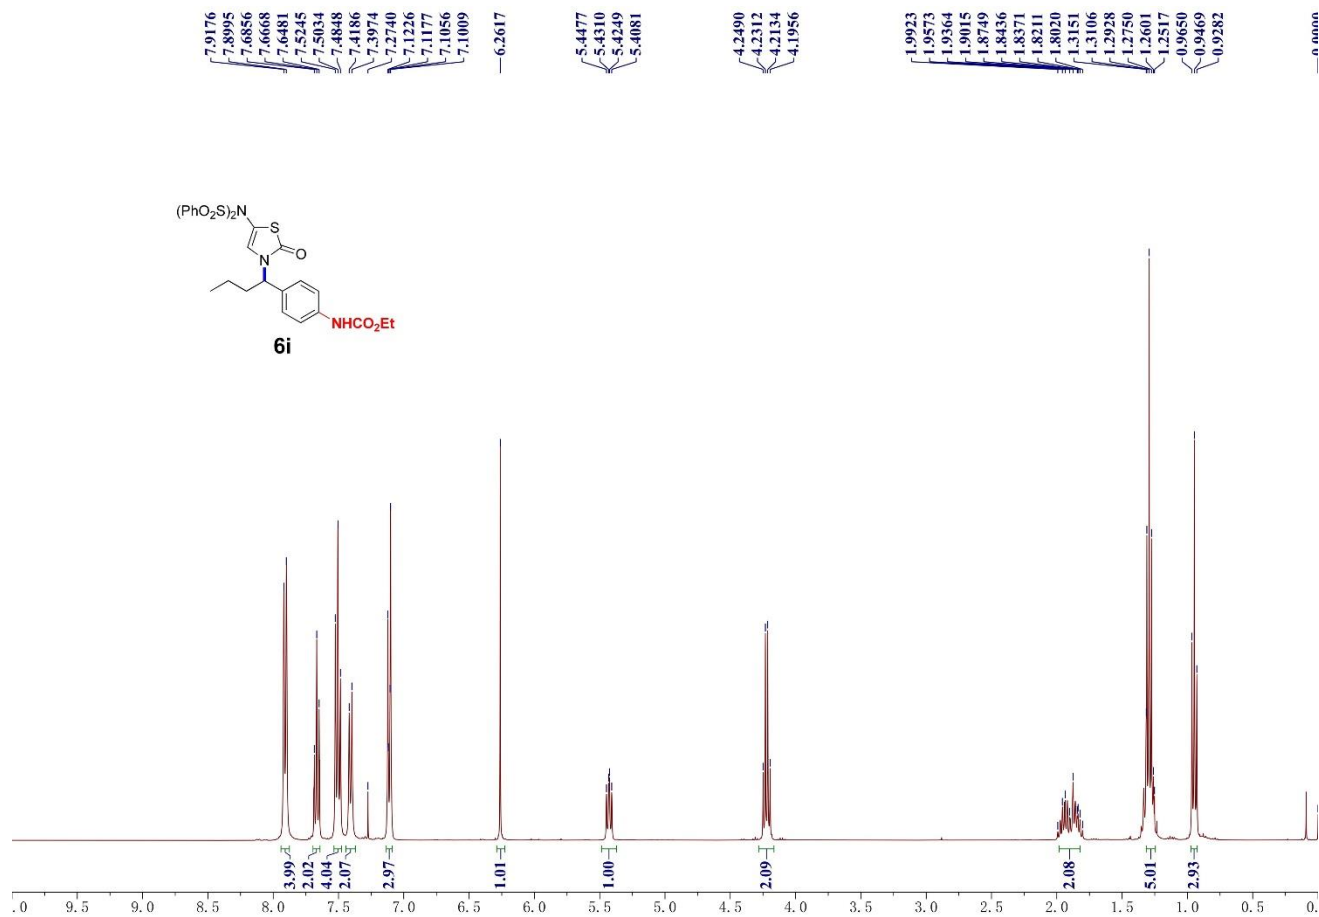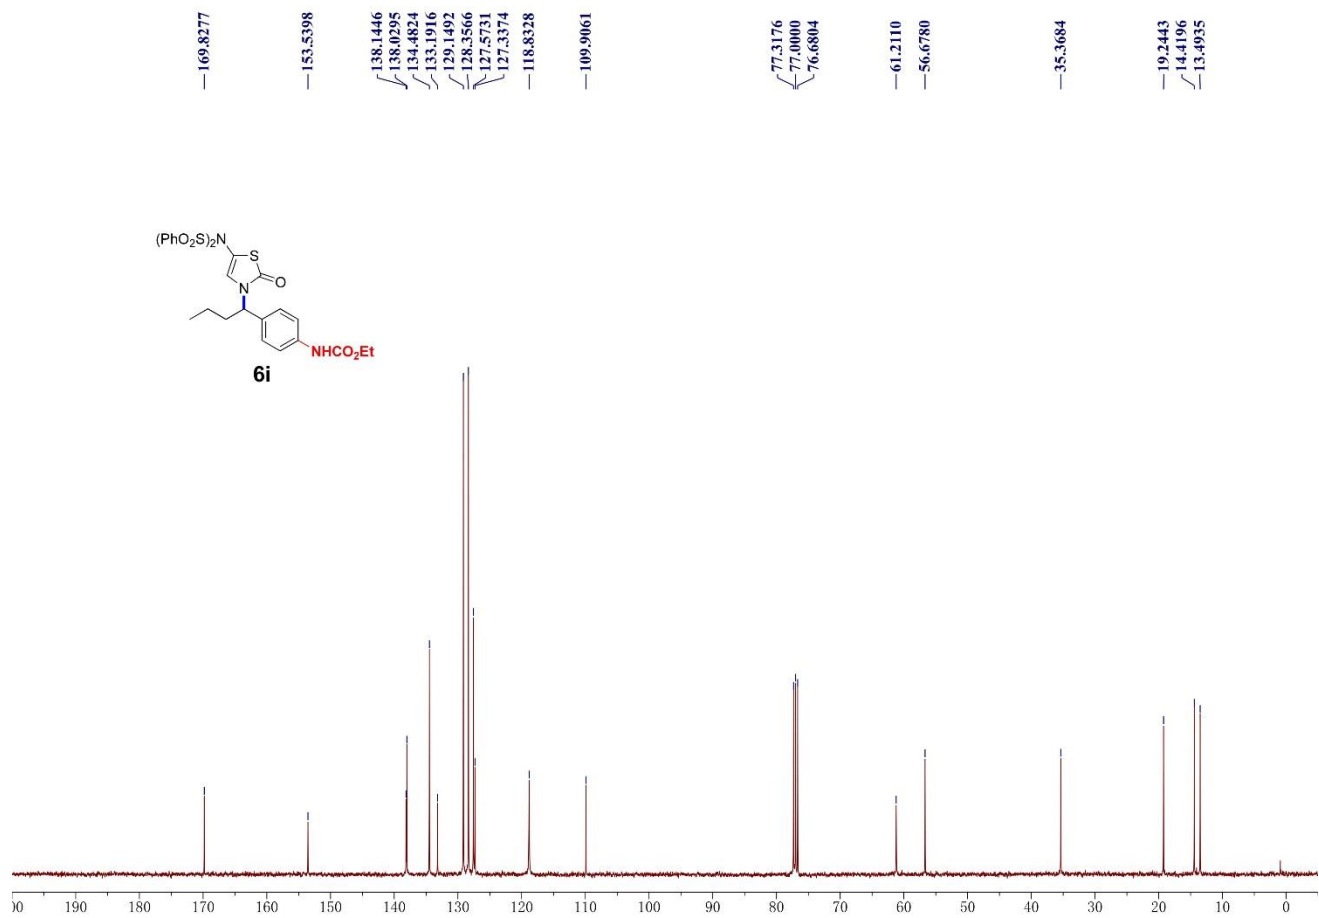

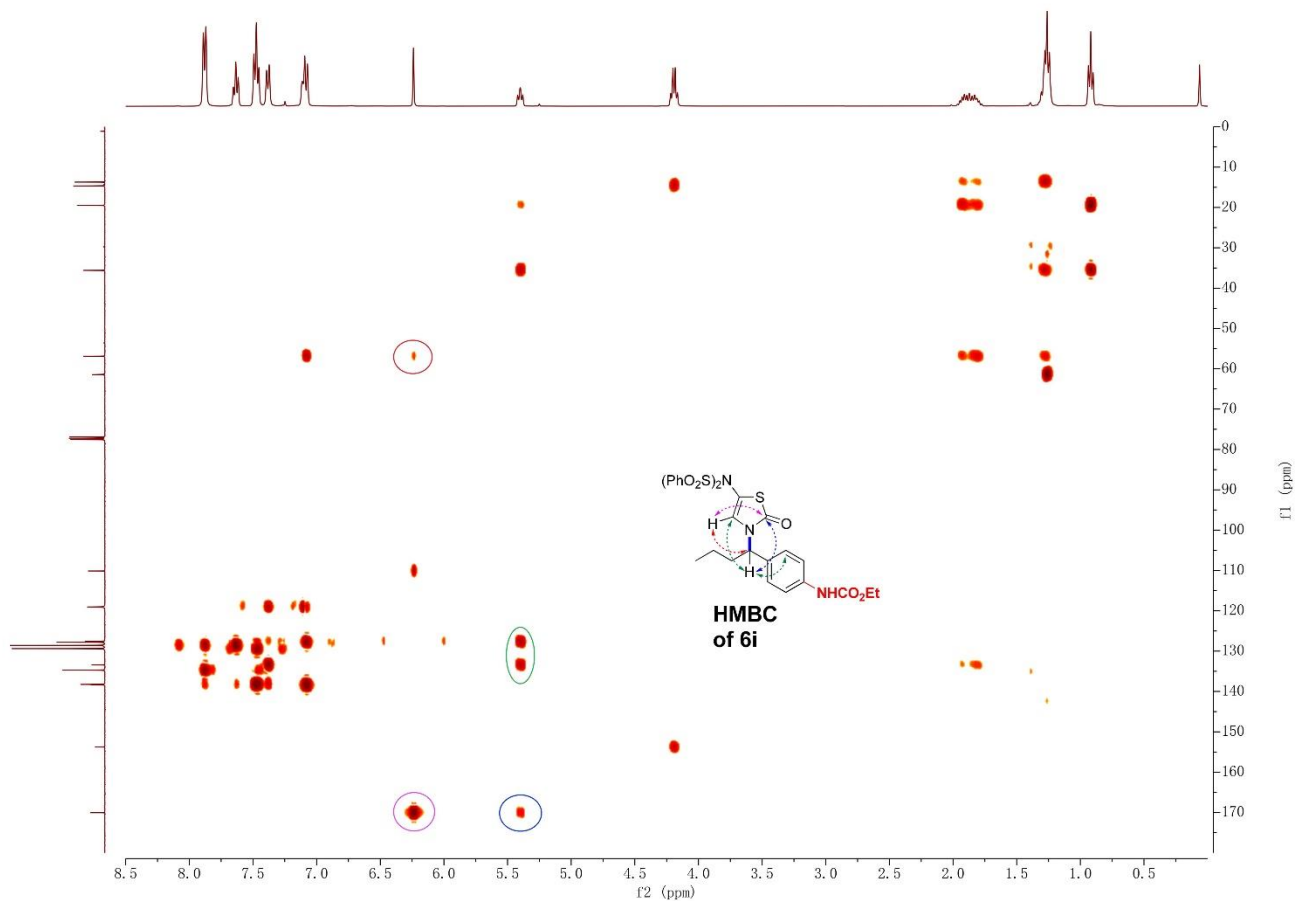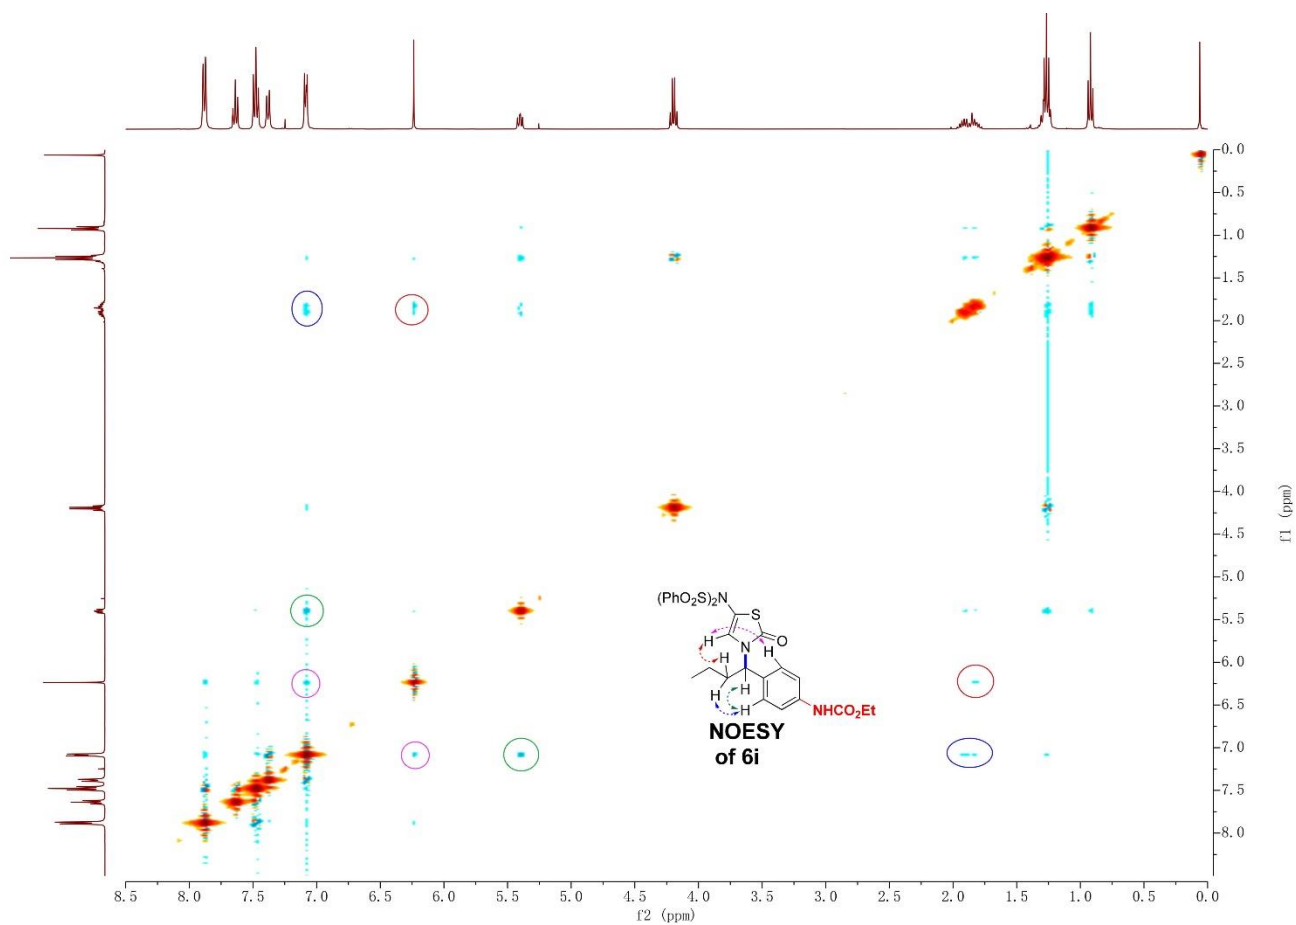

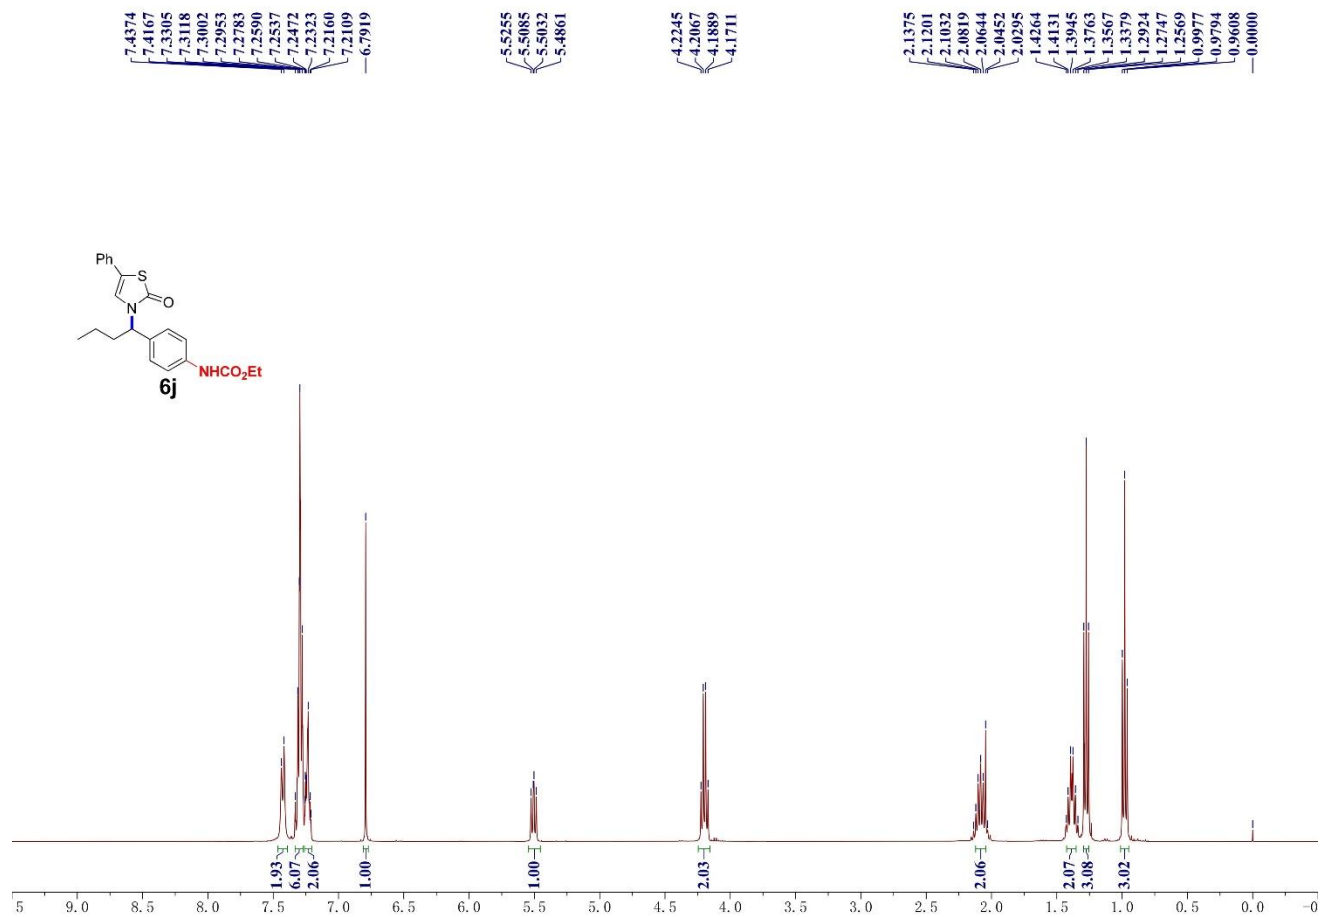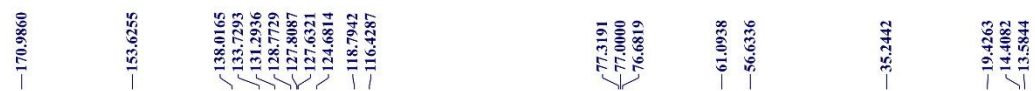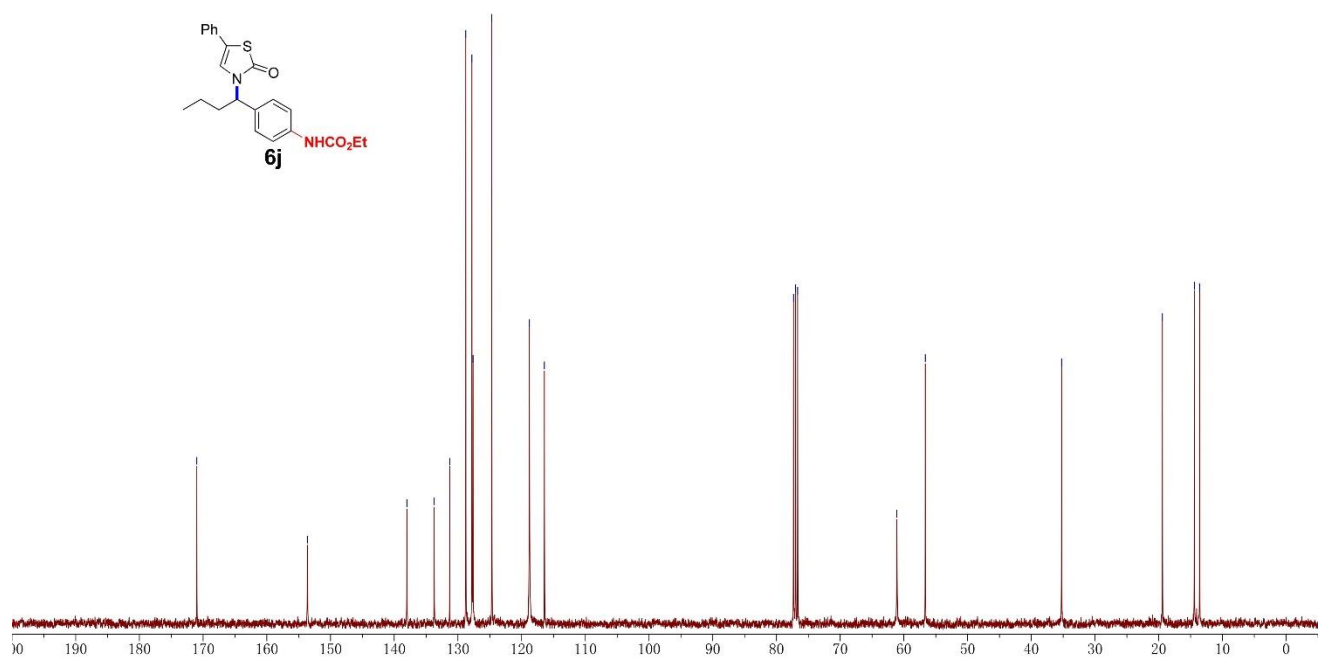

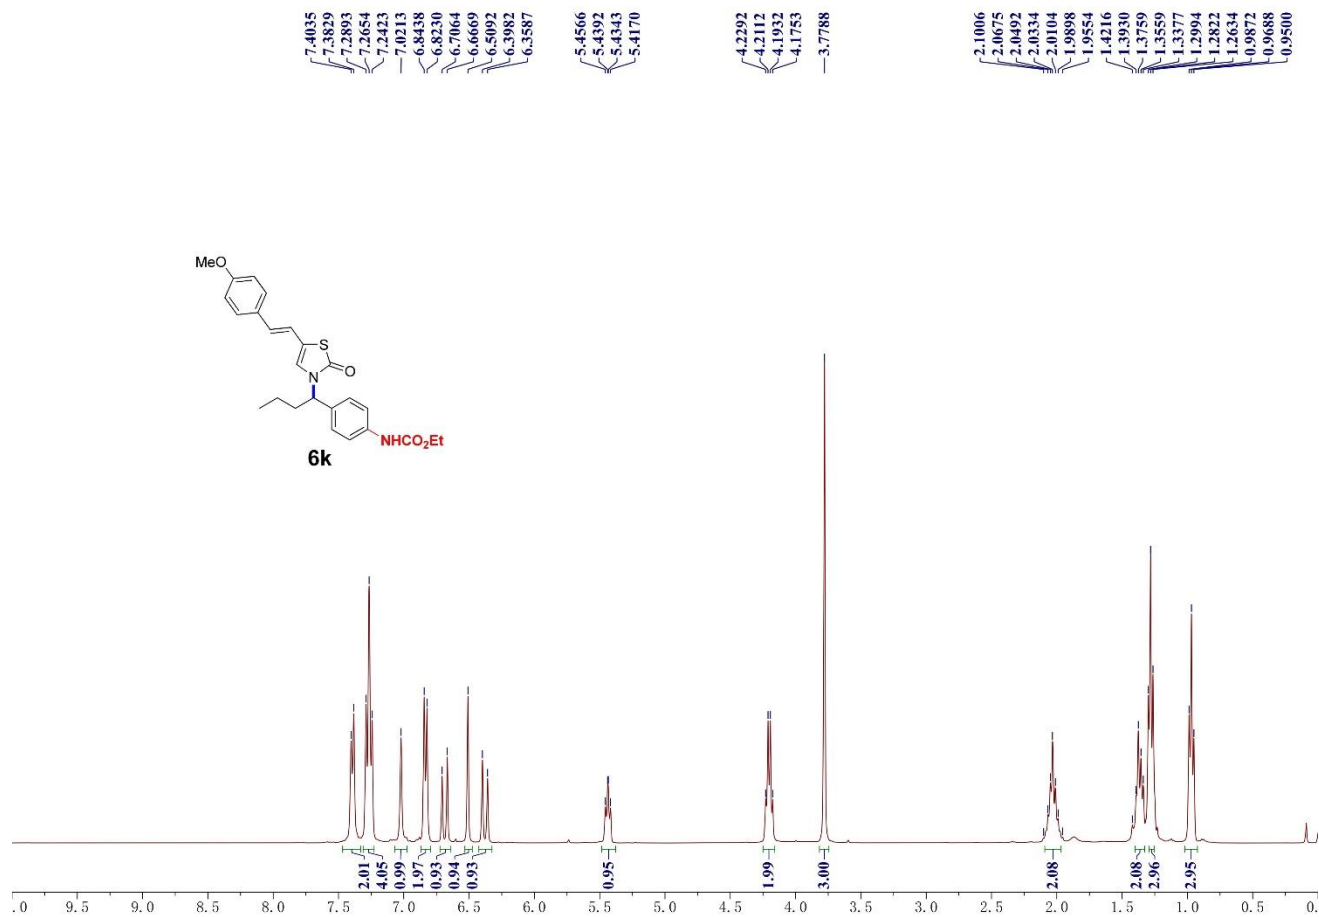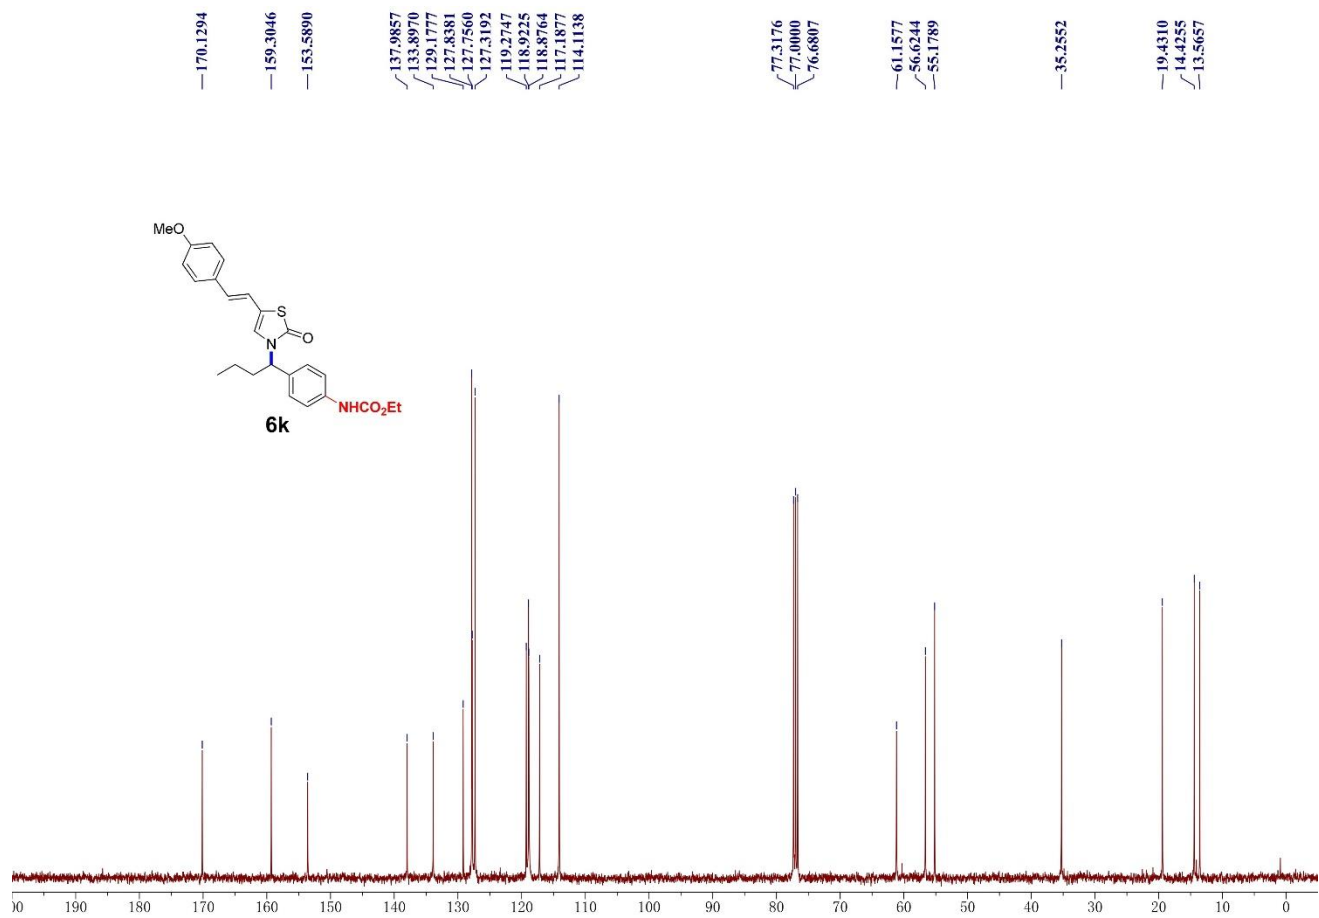

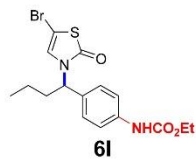

7.4265  
 7.4059  
 7.2805  
 7.2535  
 7.2319  
 7.1154  
 —6.5495  
 5.4490  
 5.4321  
 5.4264  
 5.4095  
 5.2983  
 4.2414  
 4.2237  
 4.2058  
 4.1880  
 2.0919  
 2.0573  
 2.0401  
 2.0188  
 1.9899  
 1.9700  
 1.9437  
 1.3778  
 1.3597  
 1.3411  
 1.3221  
 1.3116  
 1.2938  
 1.2760  
 0.9896  
 0.9715  
 0.9528  
 —0.0000

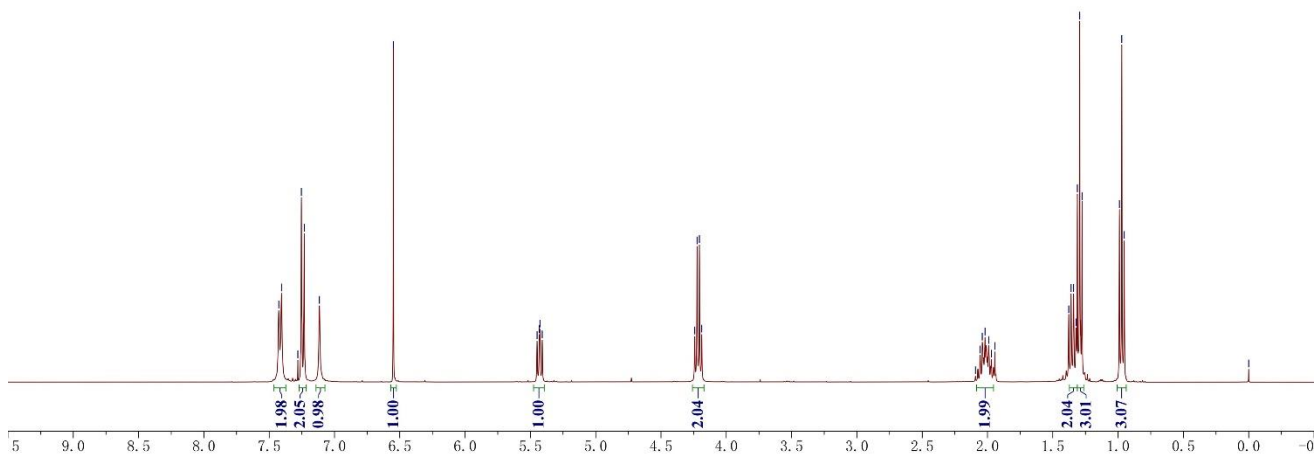

170.8623  
 153.5651  
 138.1386  
 133.2625  
 127.8759  
 122.1816  
 118.8255  
 88.9154  
 77.3189  
 77.0000  
 76.6824  
 61.1877  
 56.8674  
 35.1041  
 19.3865  
 14.4293  
 13.5463

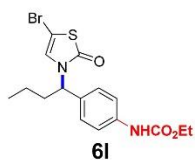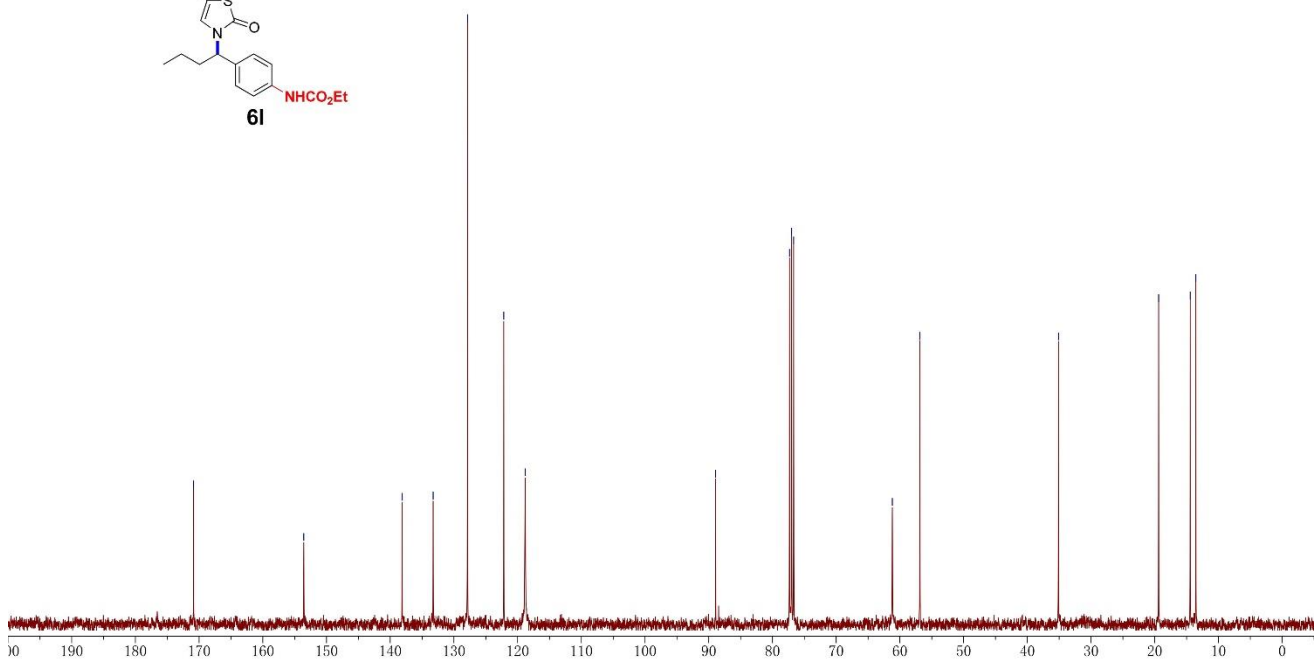

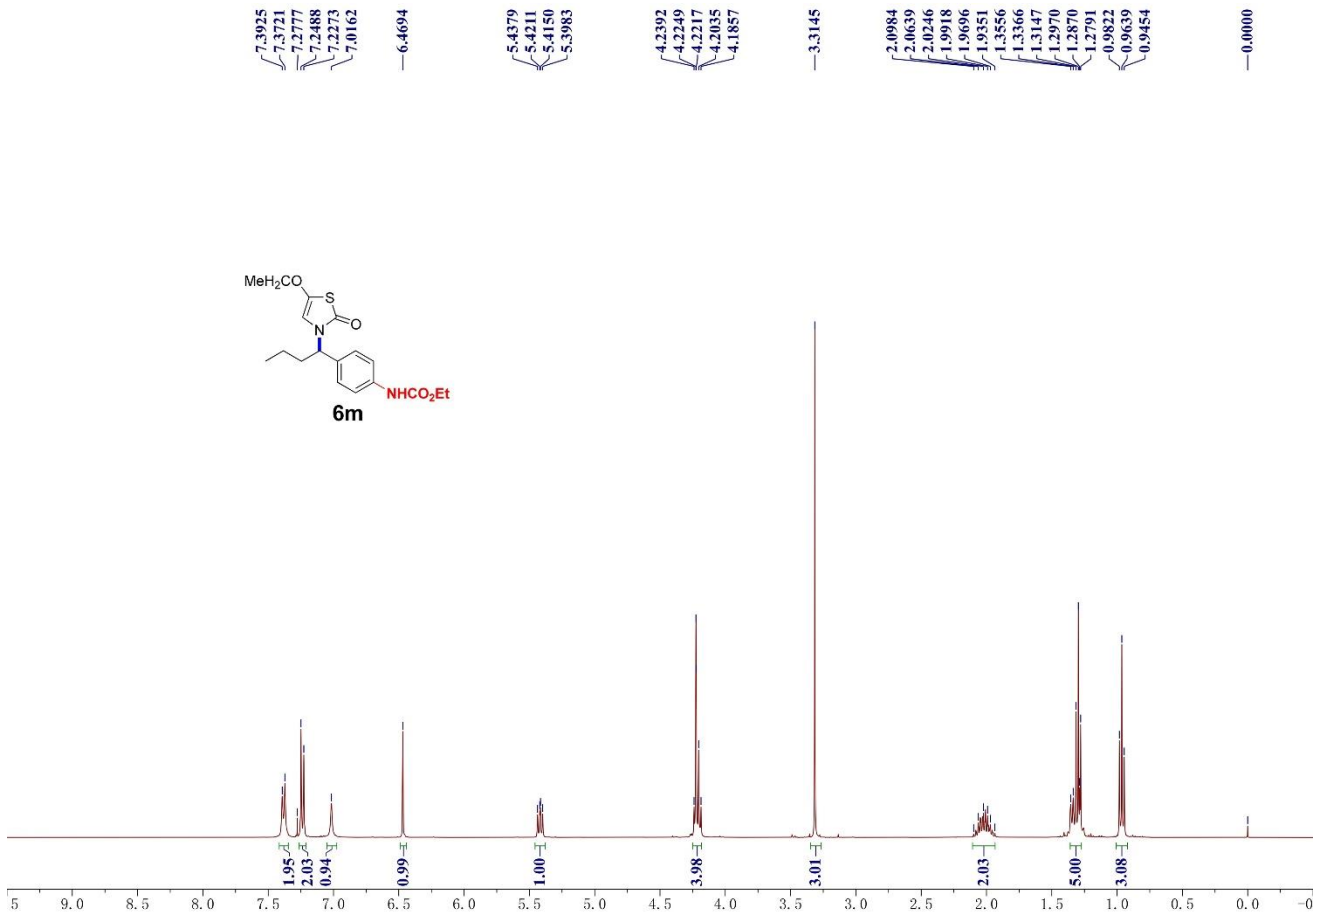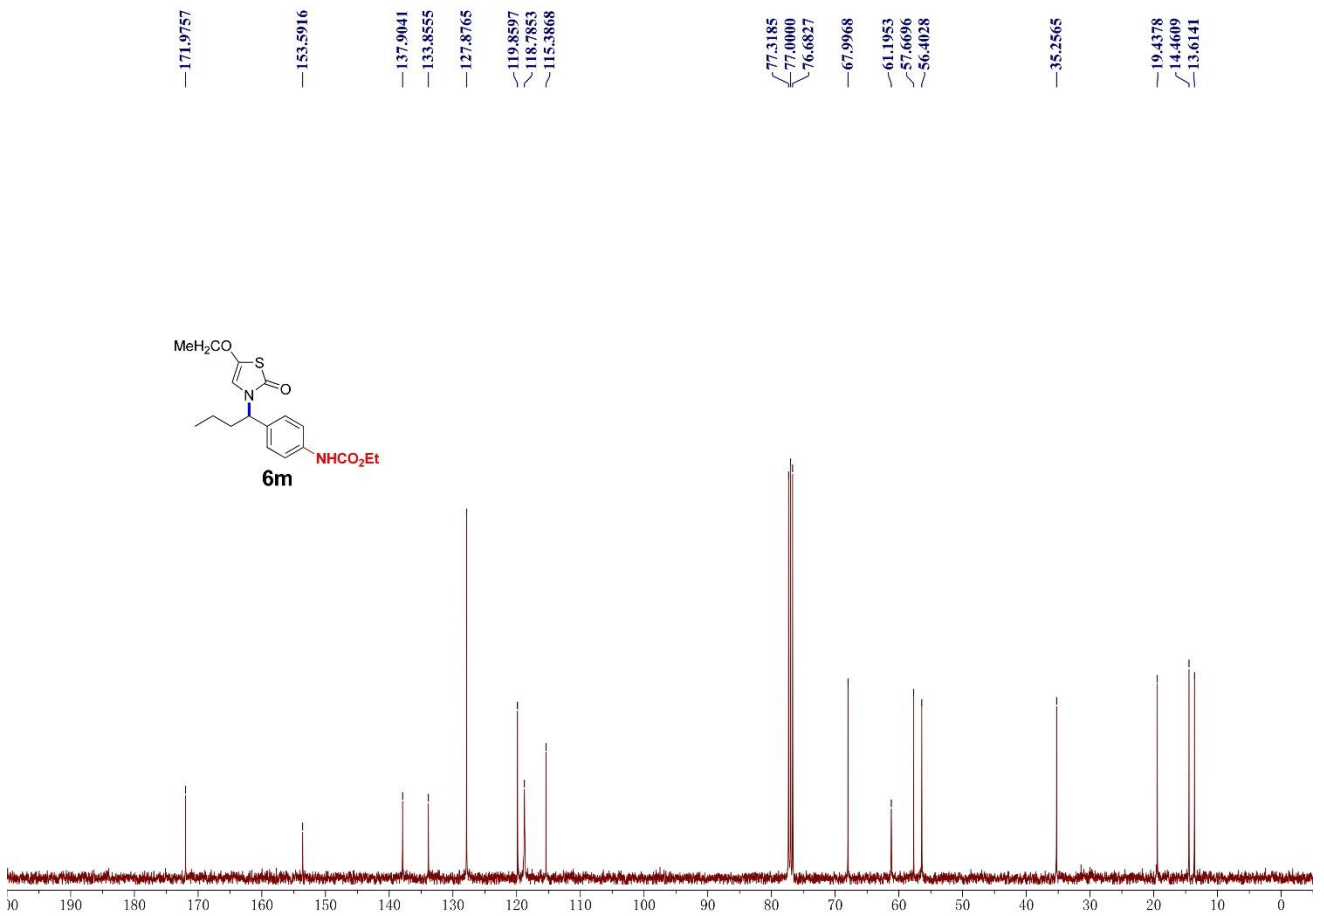



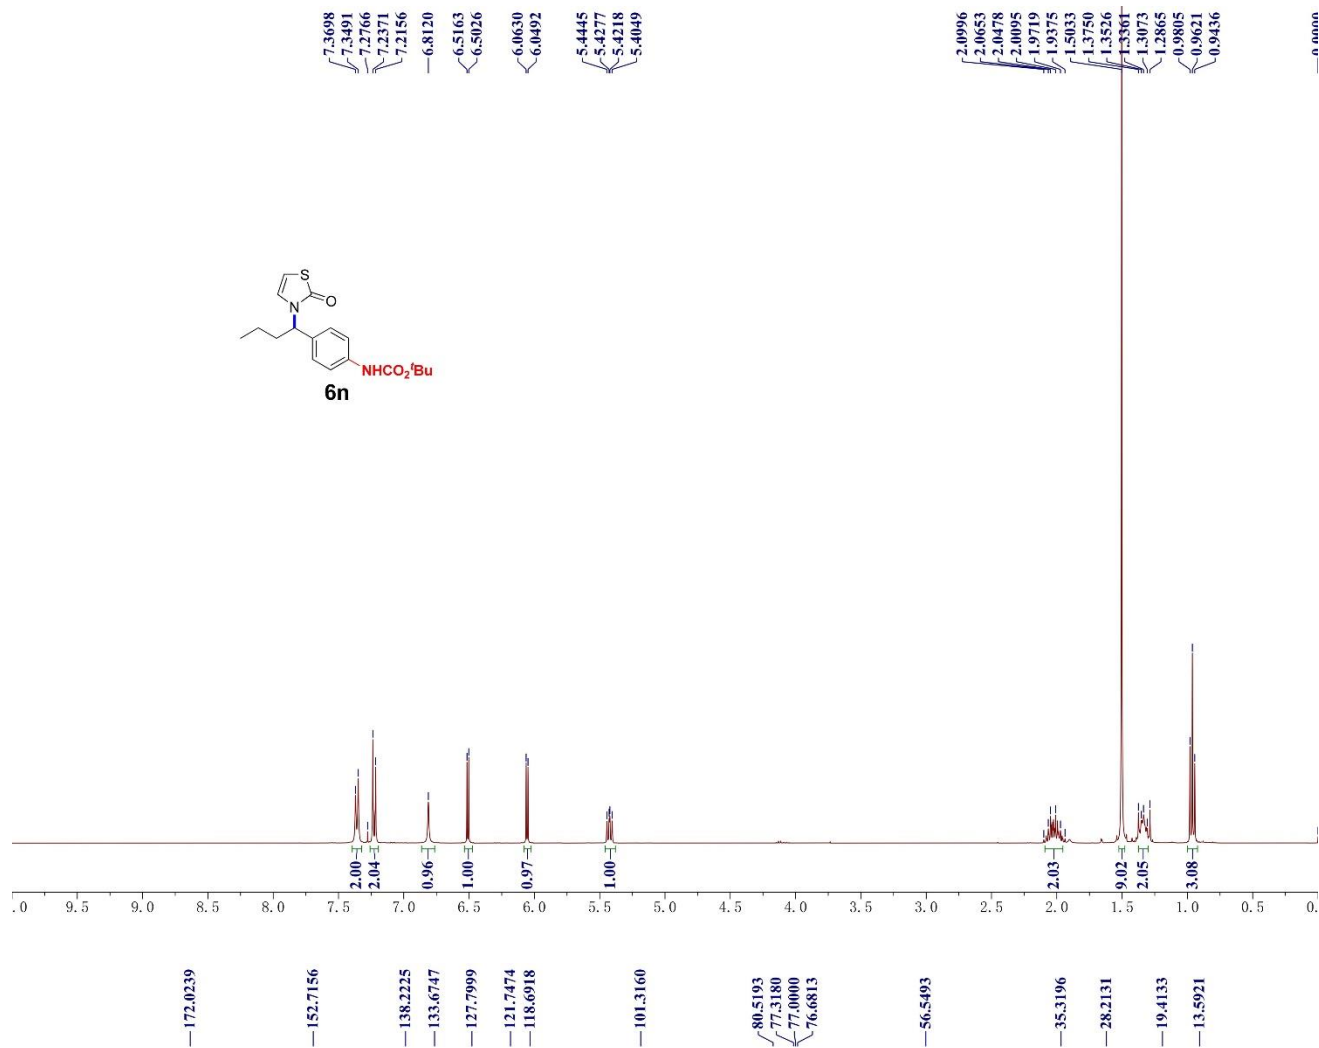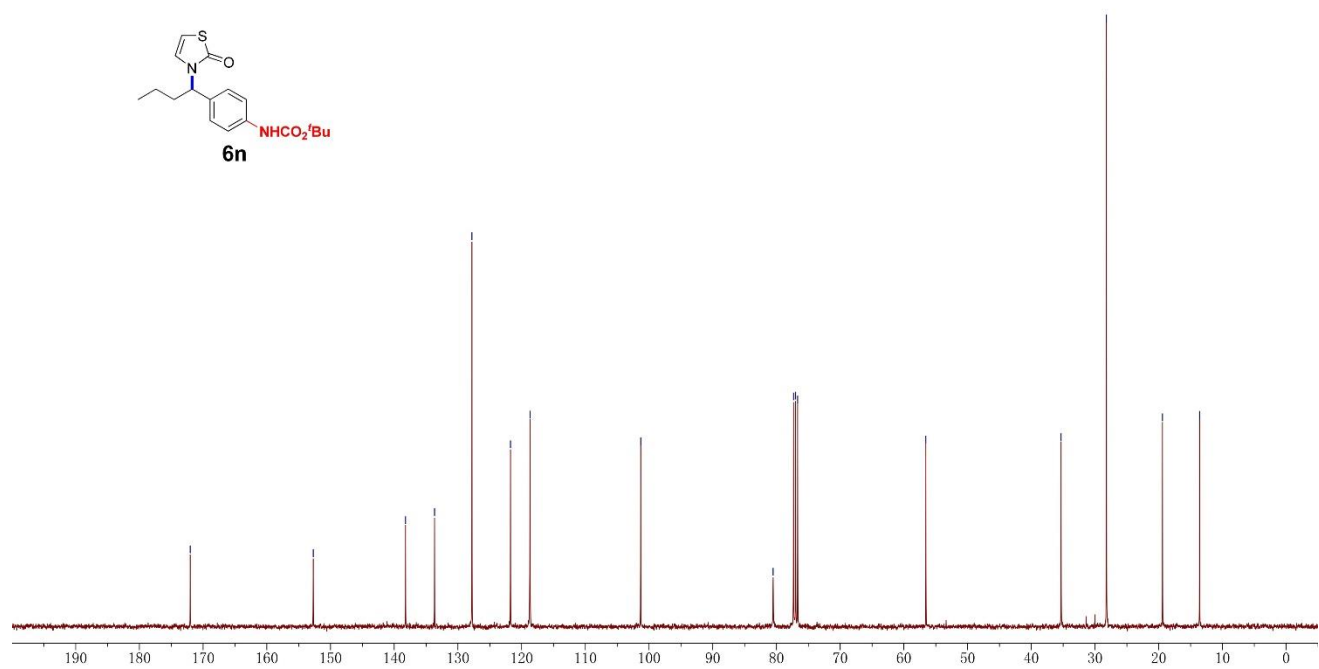

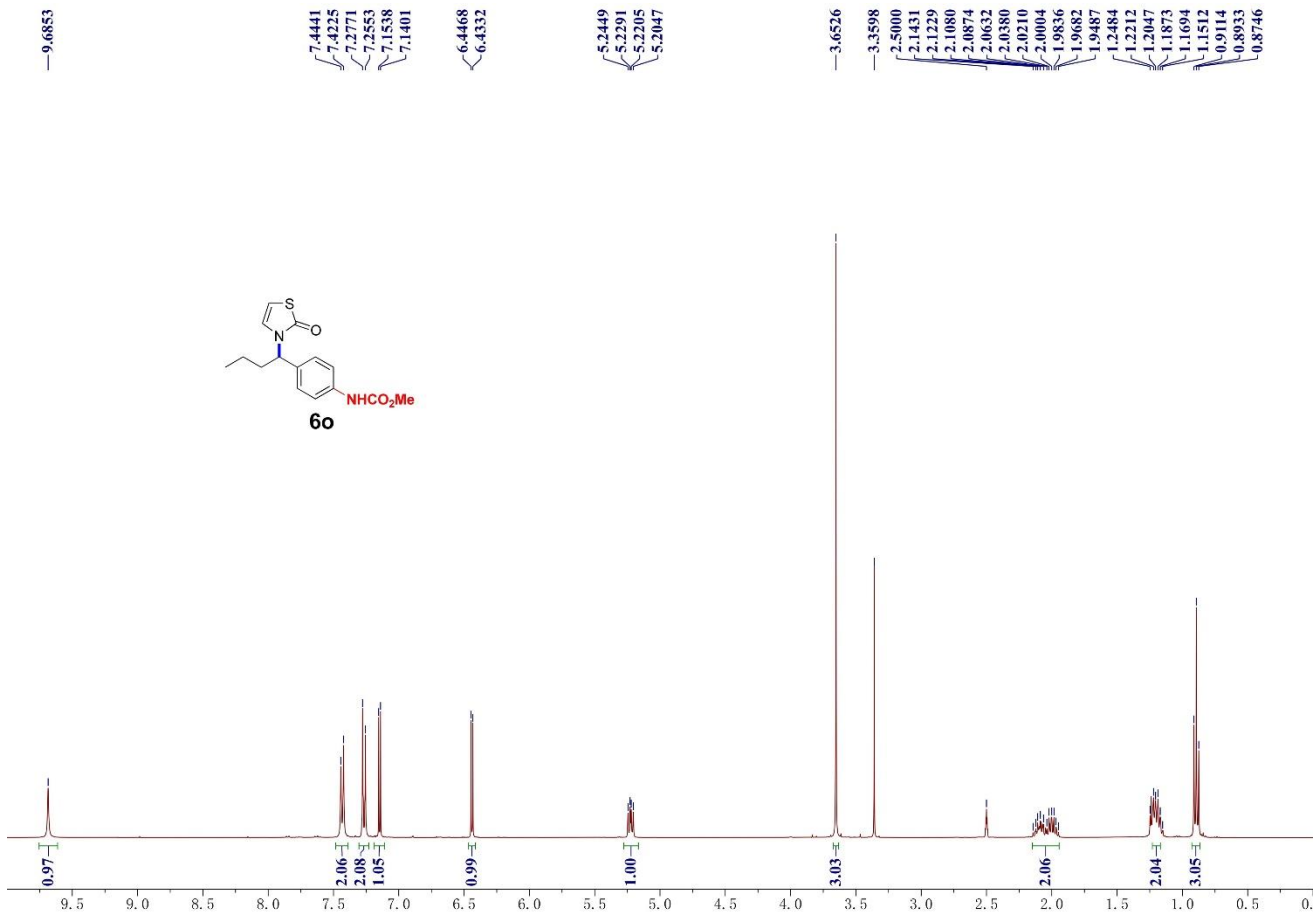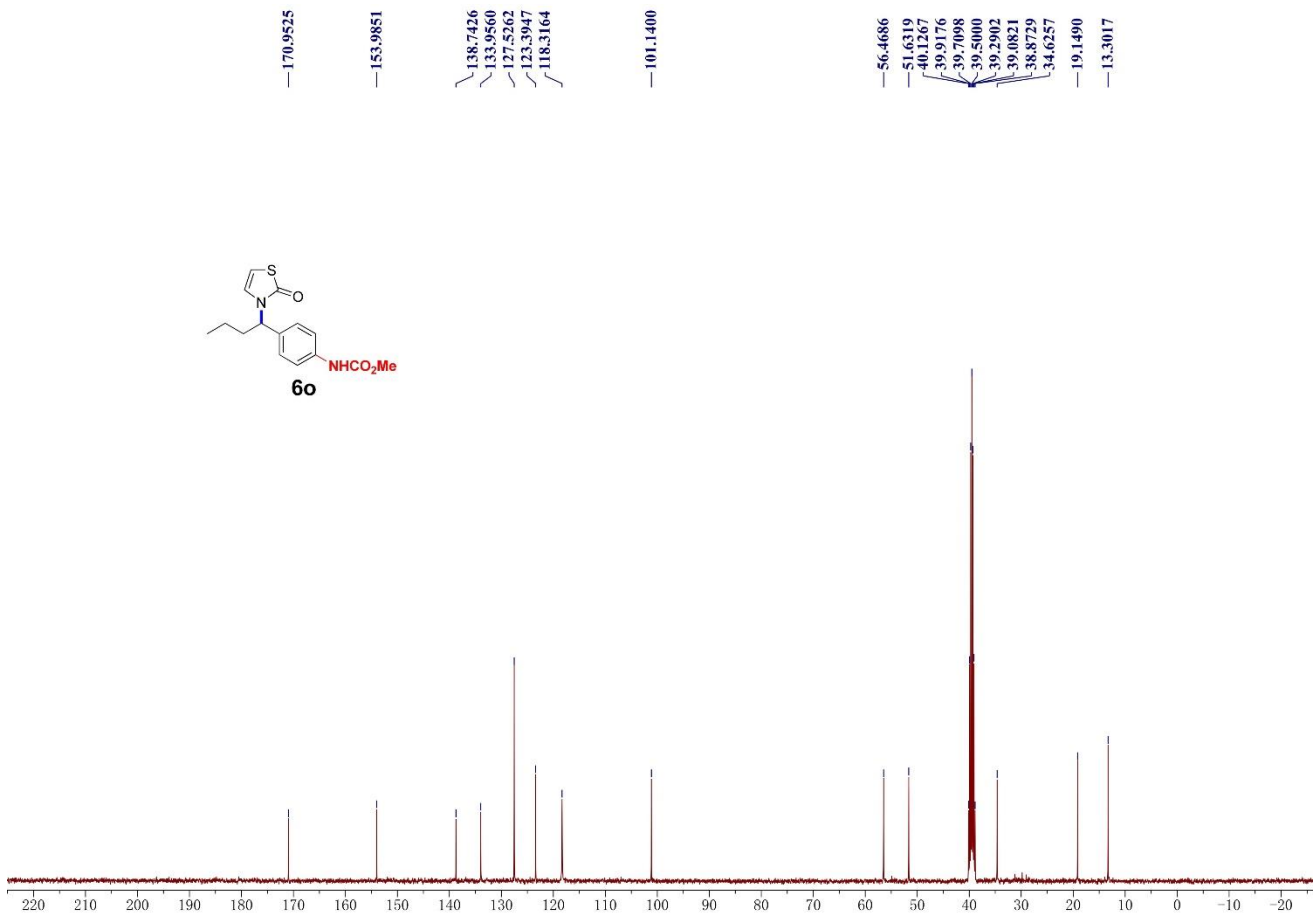

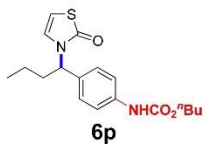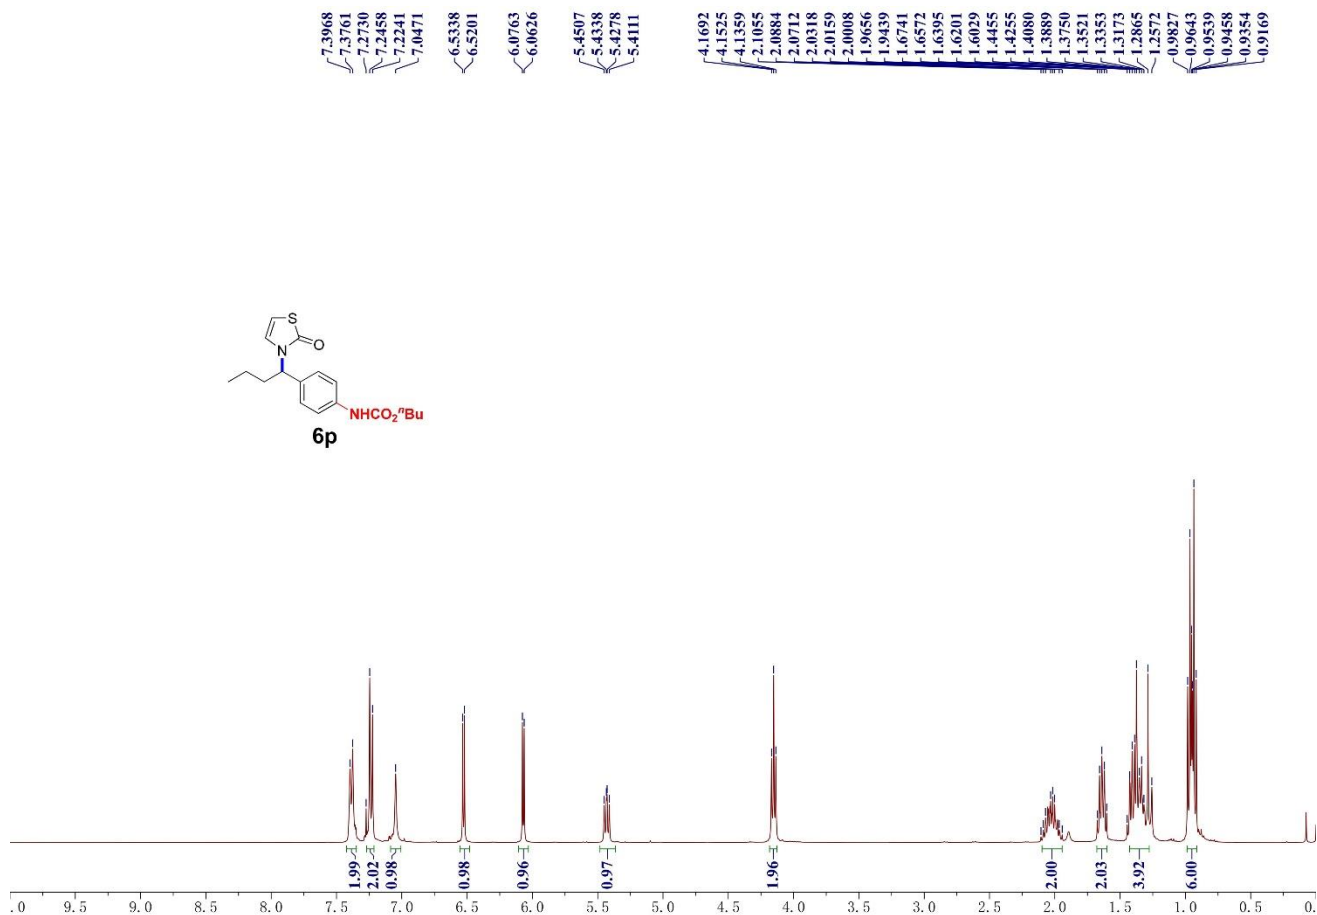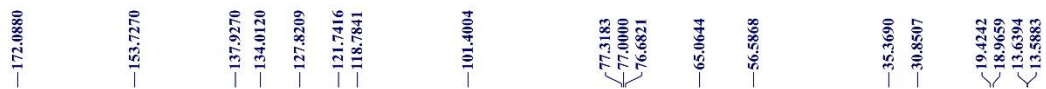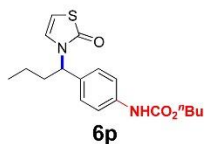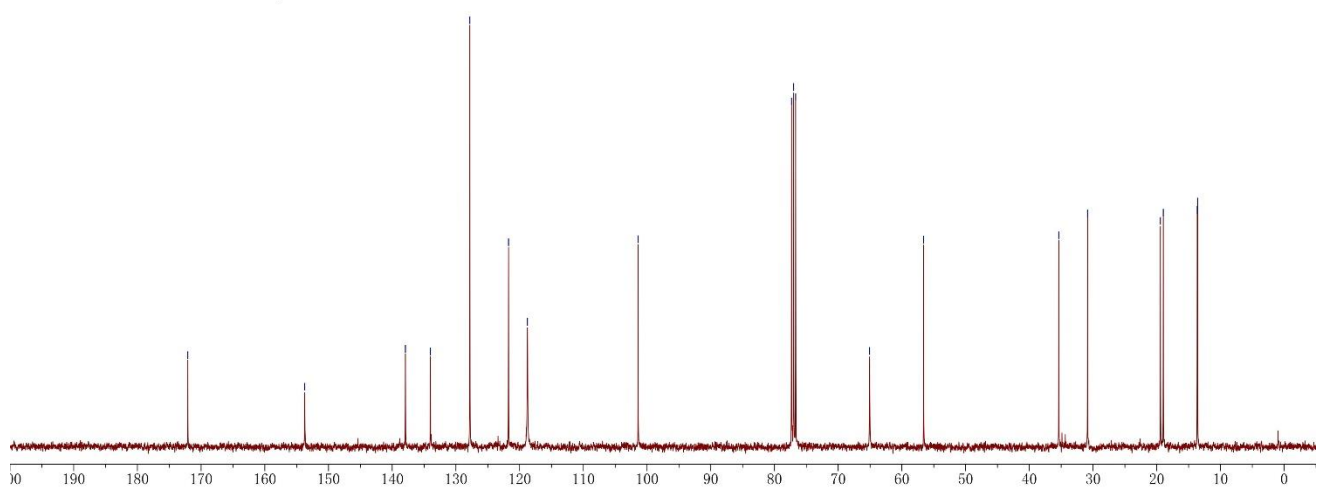

### 7.3 Spectra of Compounds in Table 3

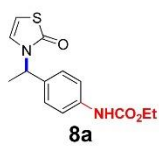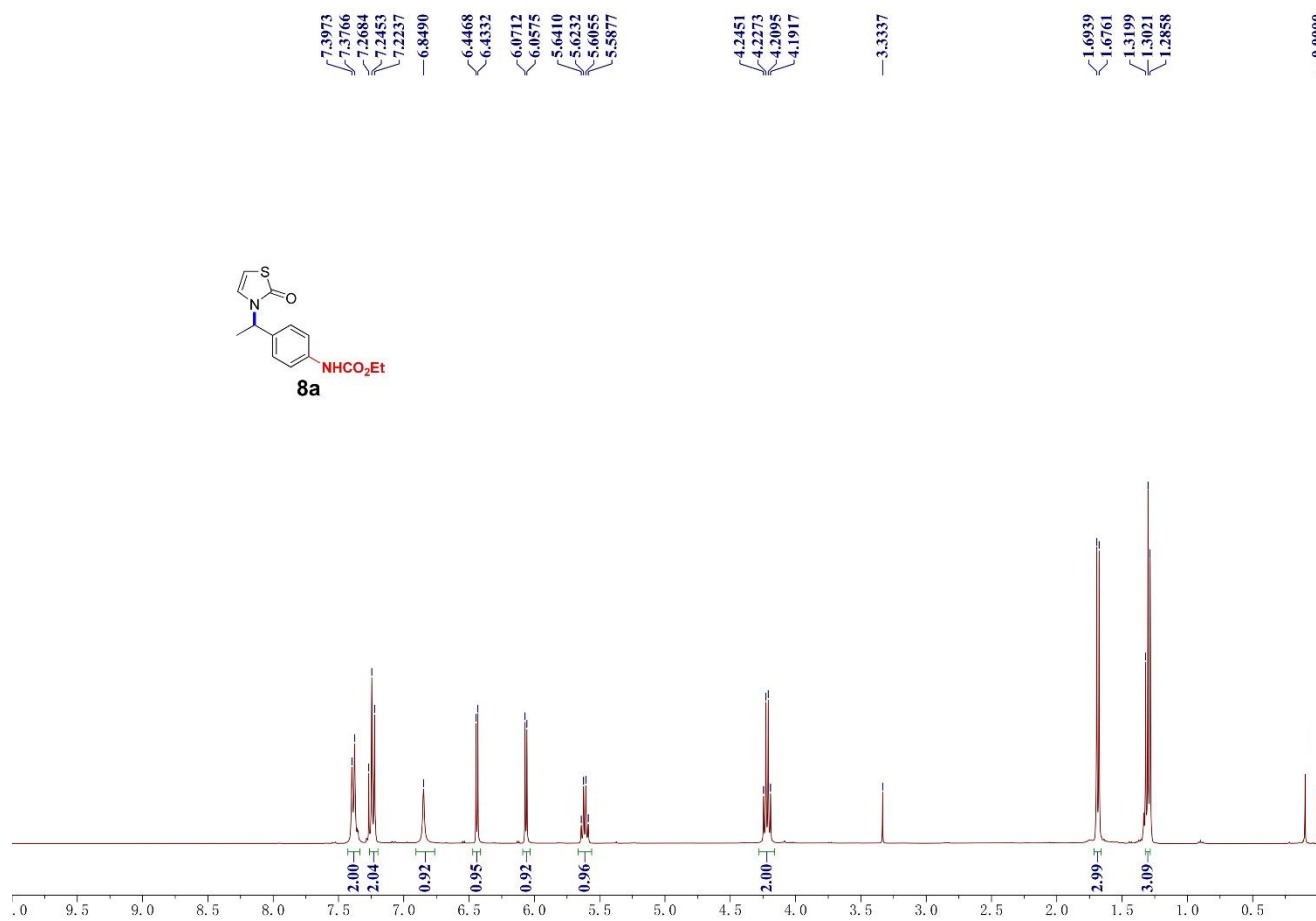

171.7838  
153.5604  
137.8607  
134.6469  
127.5467  
121.8342  
118.8197  
101.3879  
77.3177  
77.0000  
76.6814  
61.2762  
52.1941  
19.2273  
14.4863

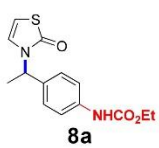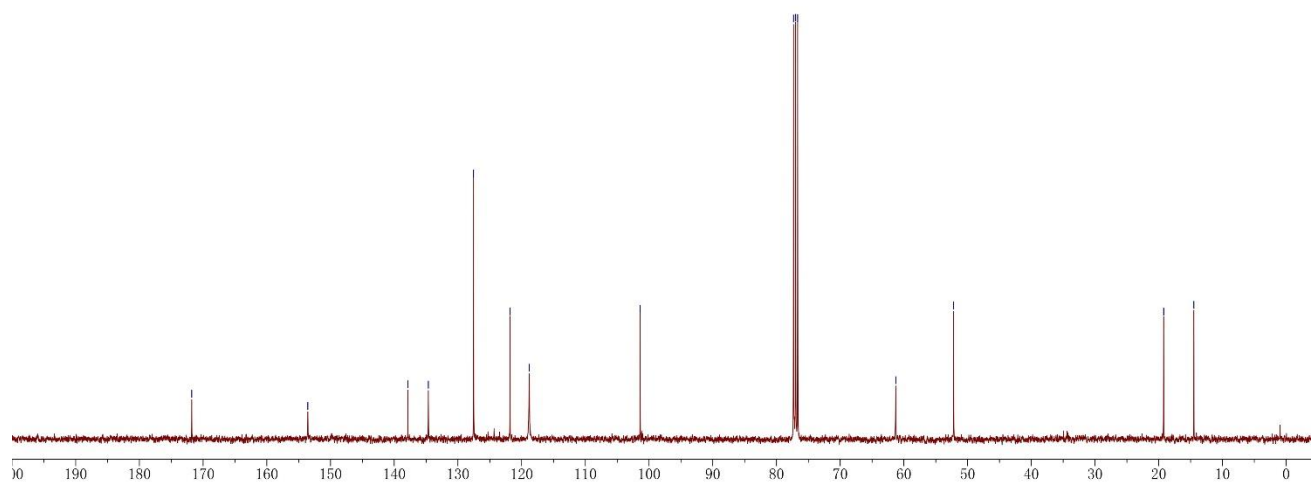

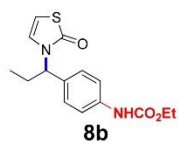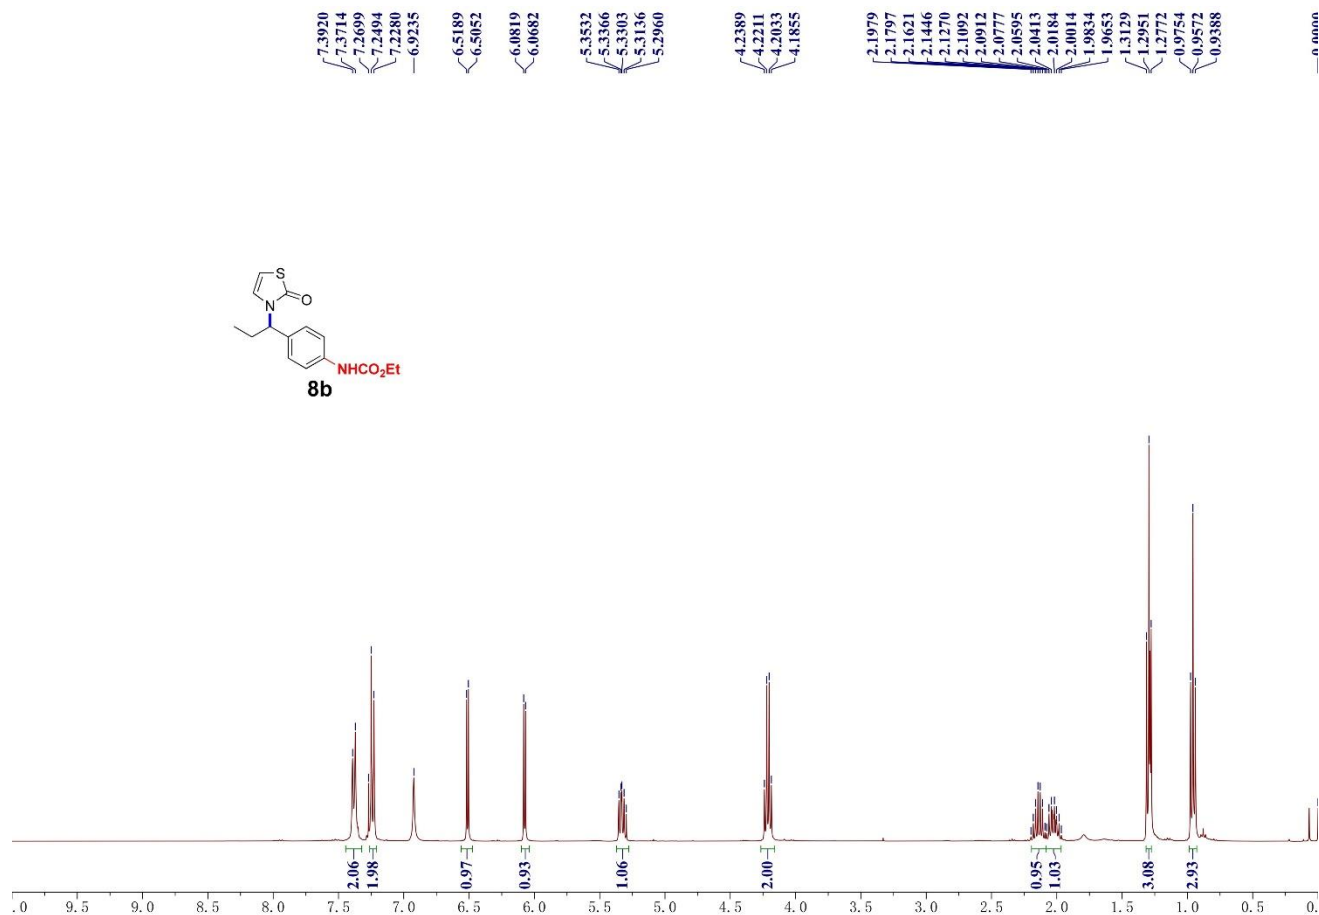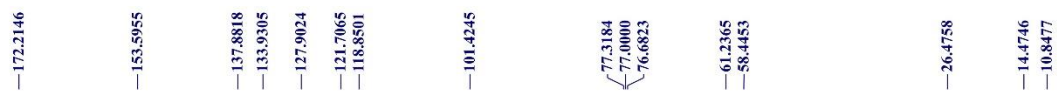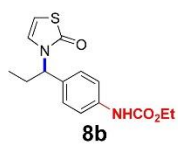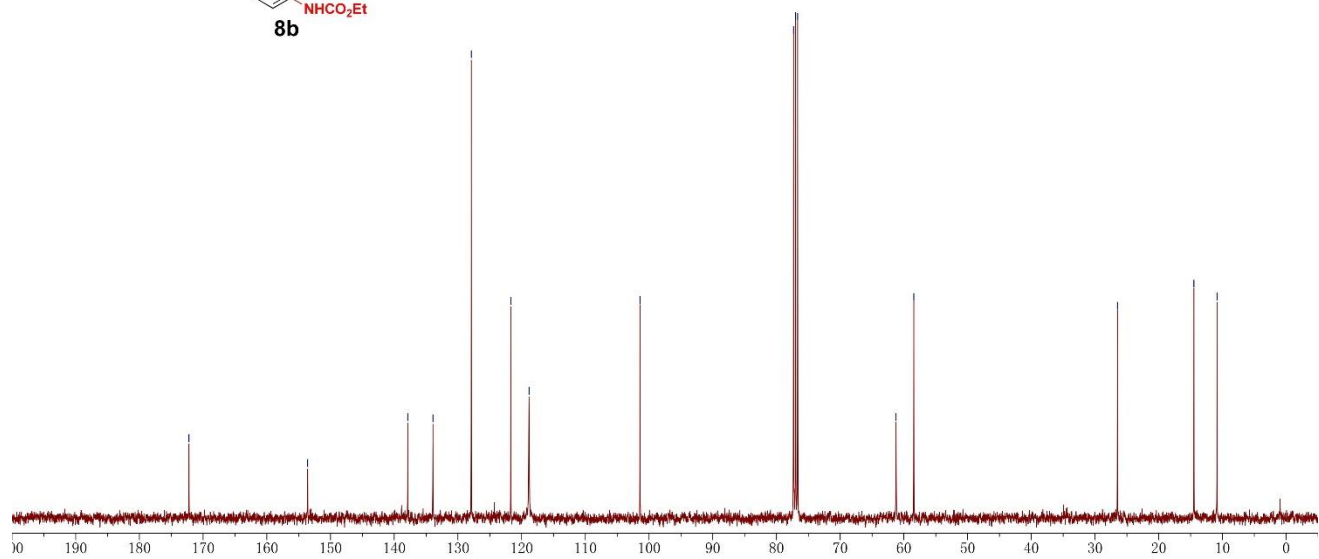

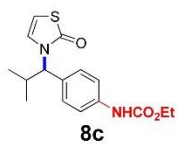

7.3928  
 7.3720  
 7.2993  
 7.2778  
 7.2703  
 6.9062  
 6.6523  
 6.6386  
 6.0730  
 6.0593  
 5.0037  
 4.9754  
 4.2390  
 4.2212  
 4.2035  
 4.1856  
 2.4955  
 2.4795  
 2.4633  
 2.4512  
 2.4468  
 2.4348  
 2.4185  
 2.4022  
 1.3129  
 1.2951  
 1.2774  
 0.9818  
 0.9654  
 0.9174  
 0.9011

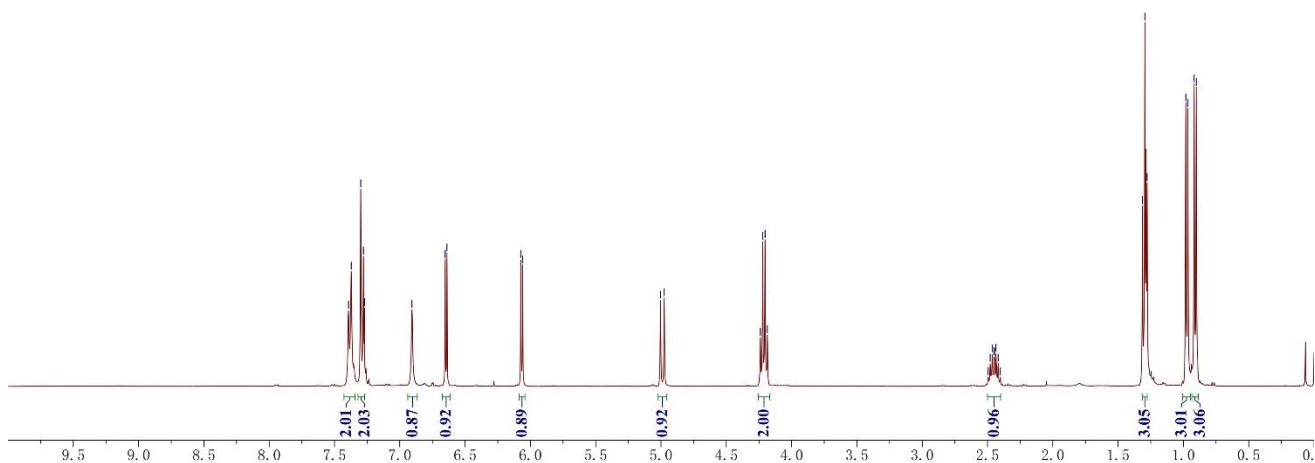

172.1490  
 153.5968  
 137.9001  
 133.4293  
 128.6058  
 121.7001  
 118.9064  
 101.4754  
 77.3182  
 77.0000  
 76.6830  
 63.9196  
 61.2540  
 30.8648  
 20.3079  
 19.4630  
 14.4769

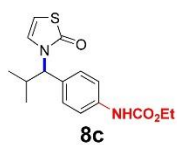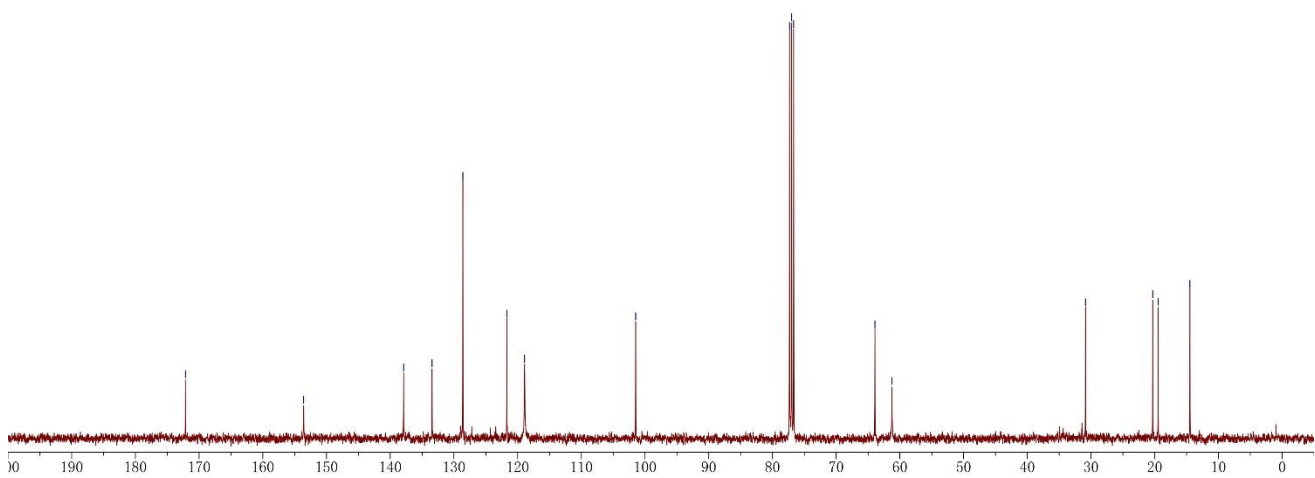

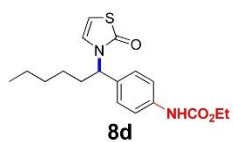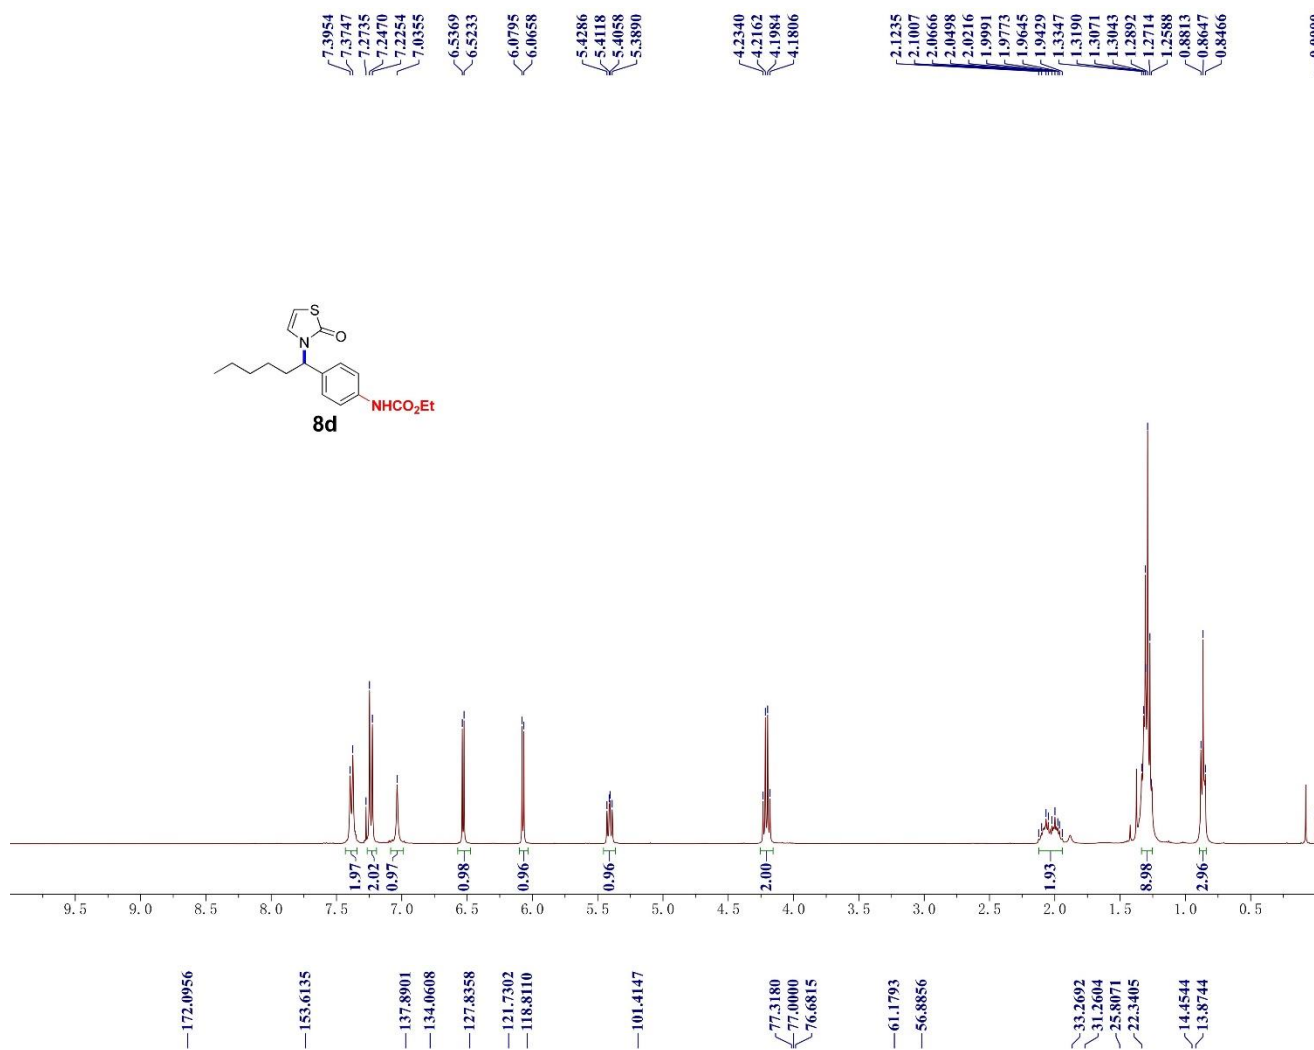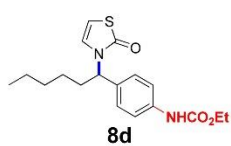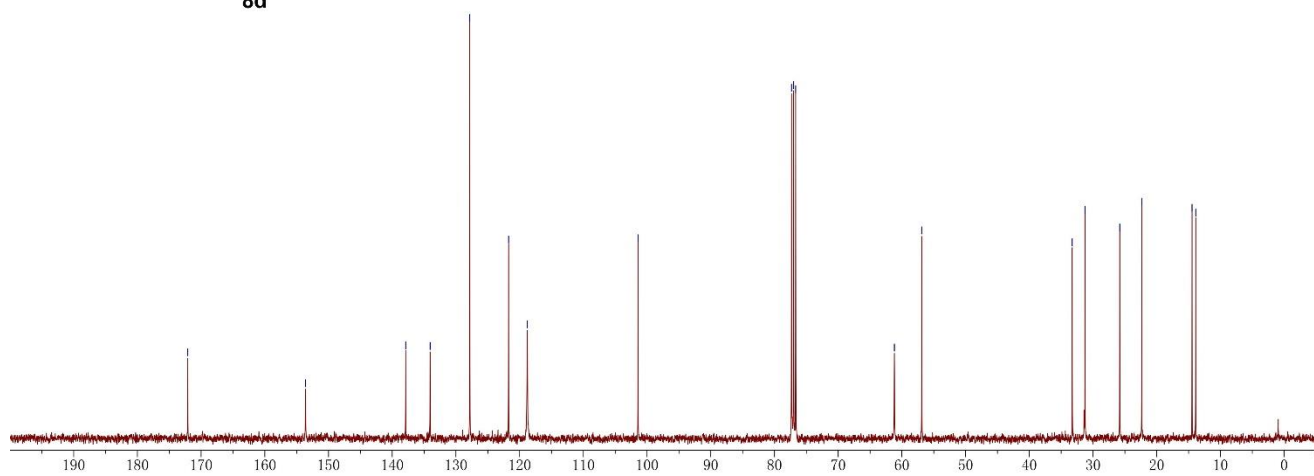

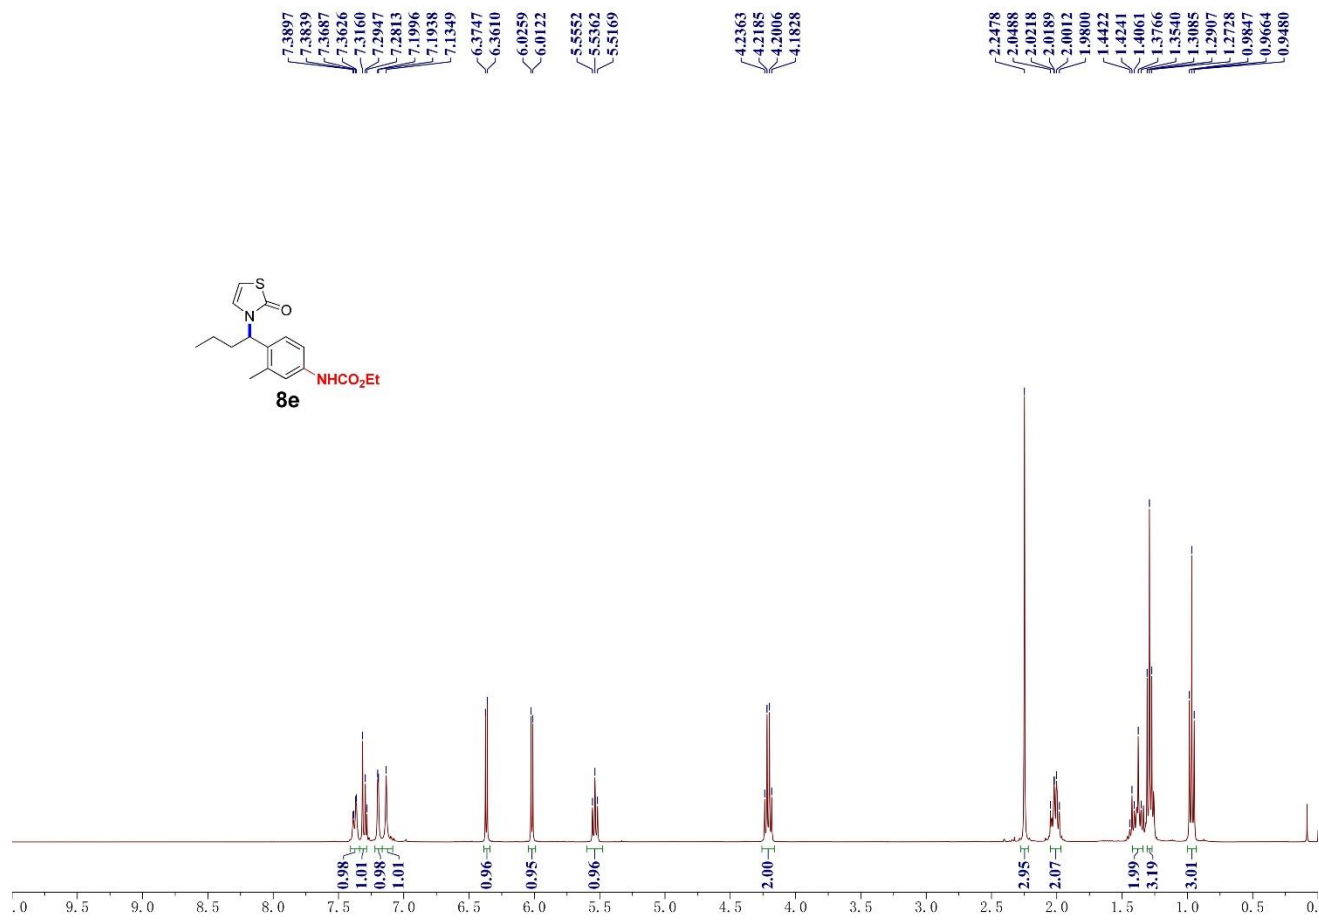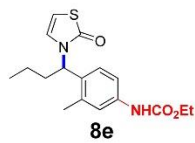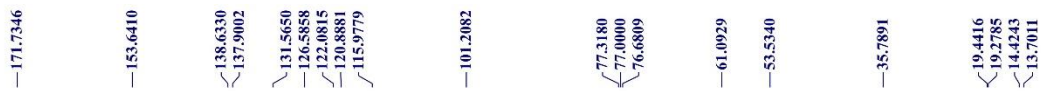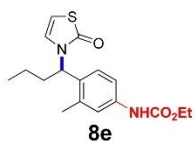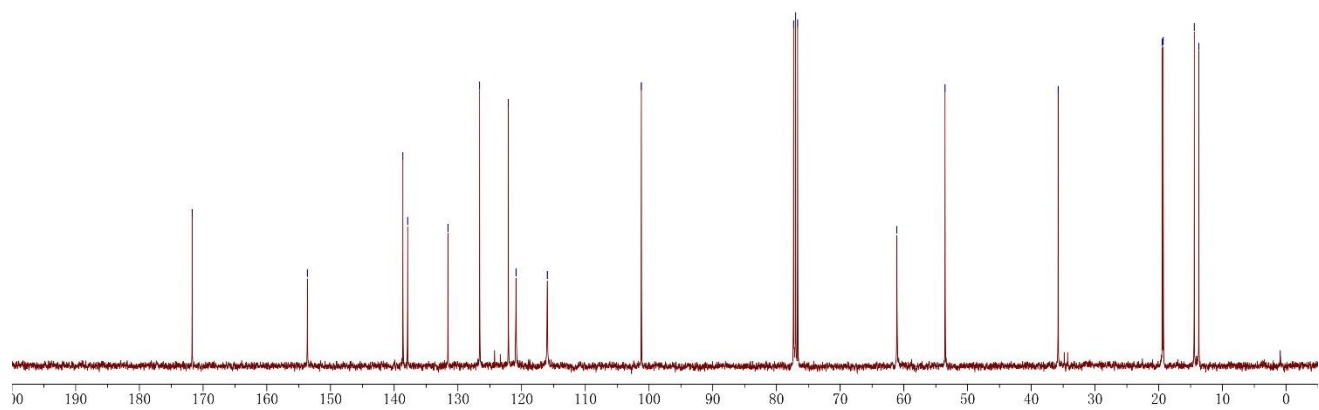



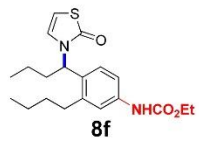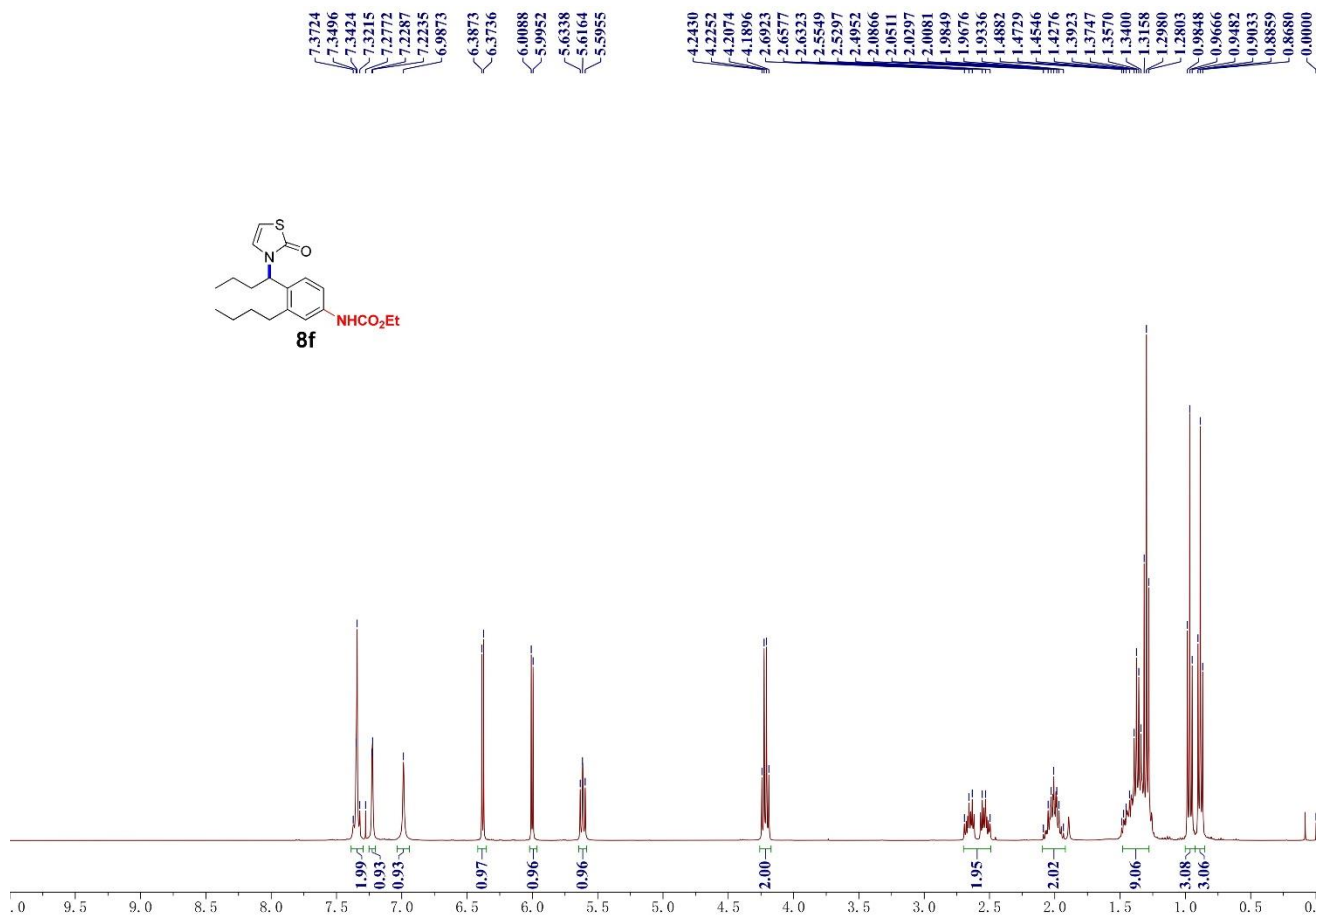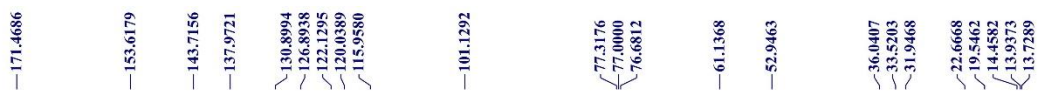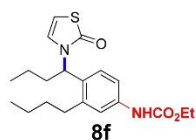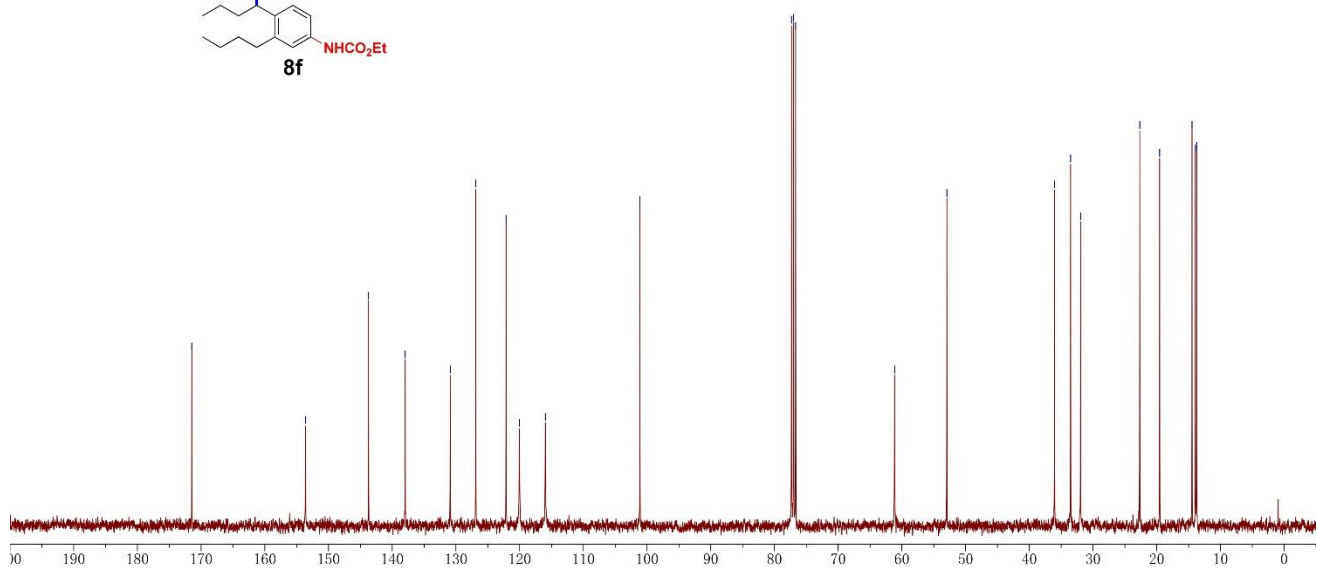

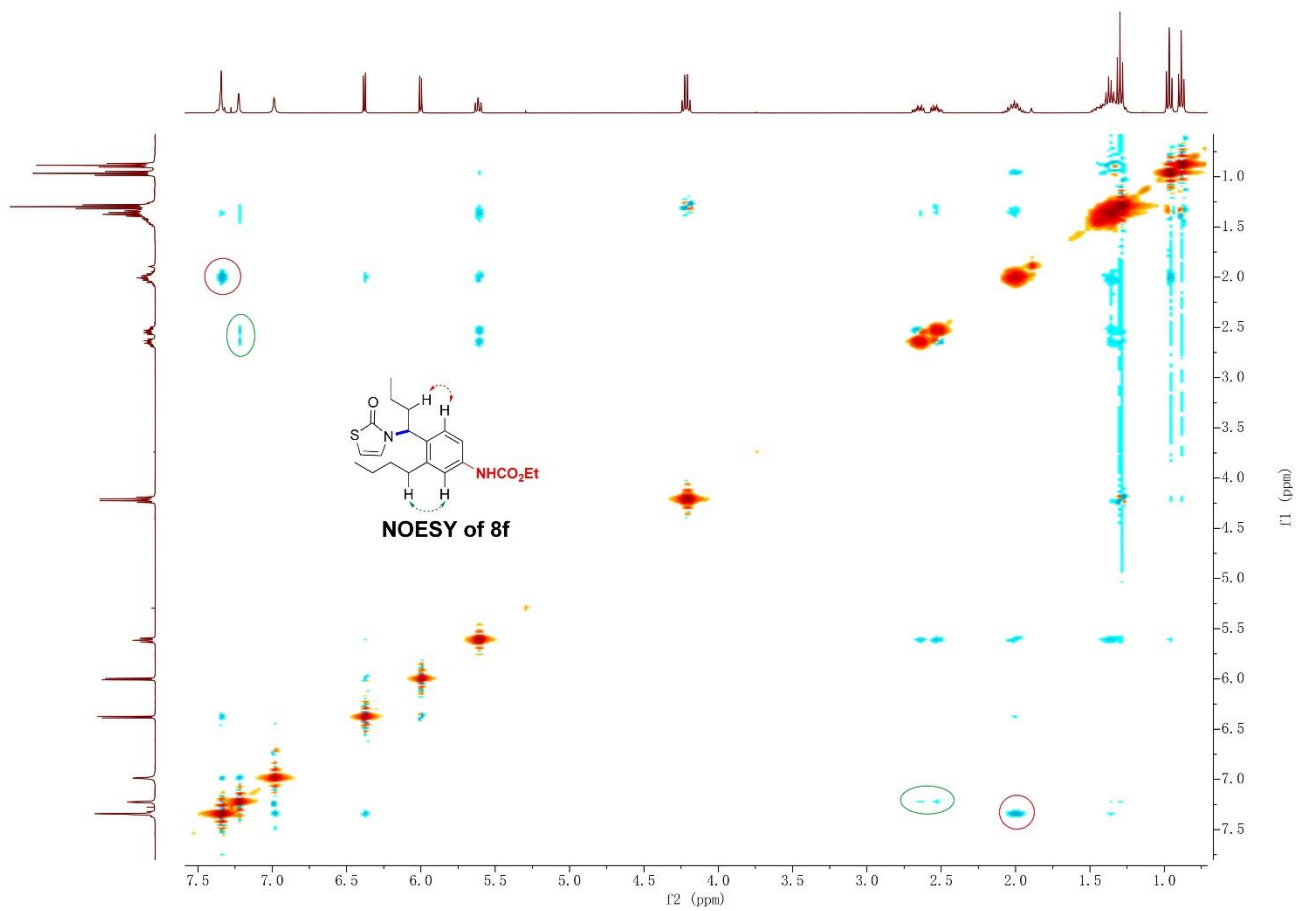

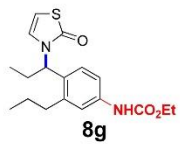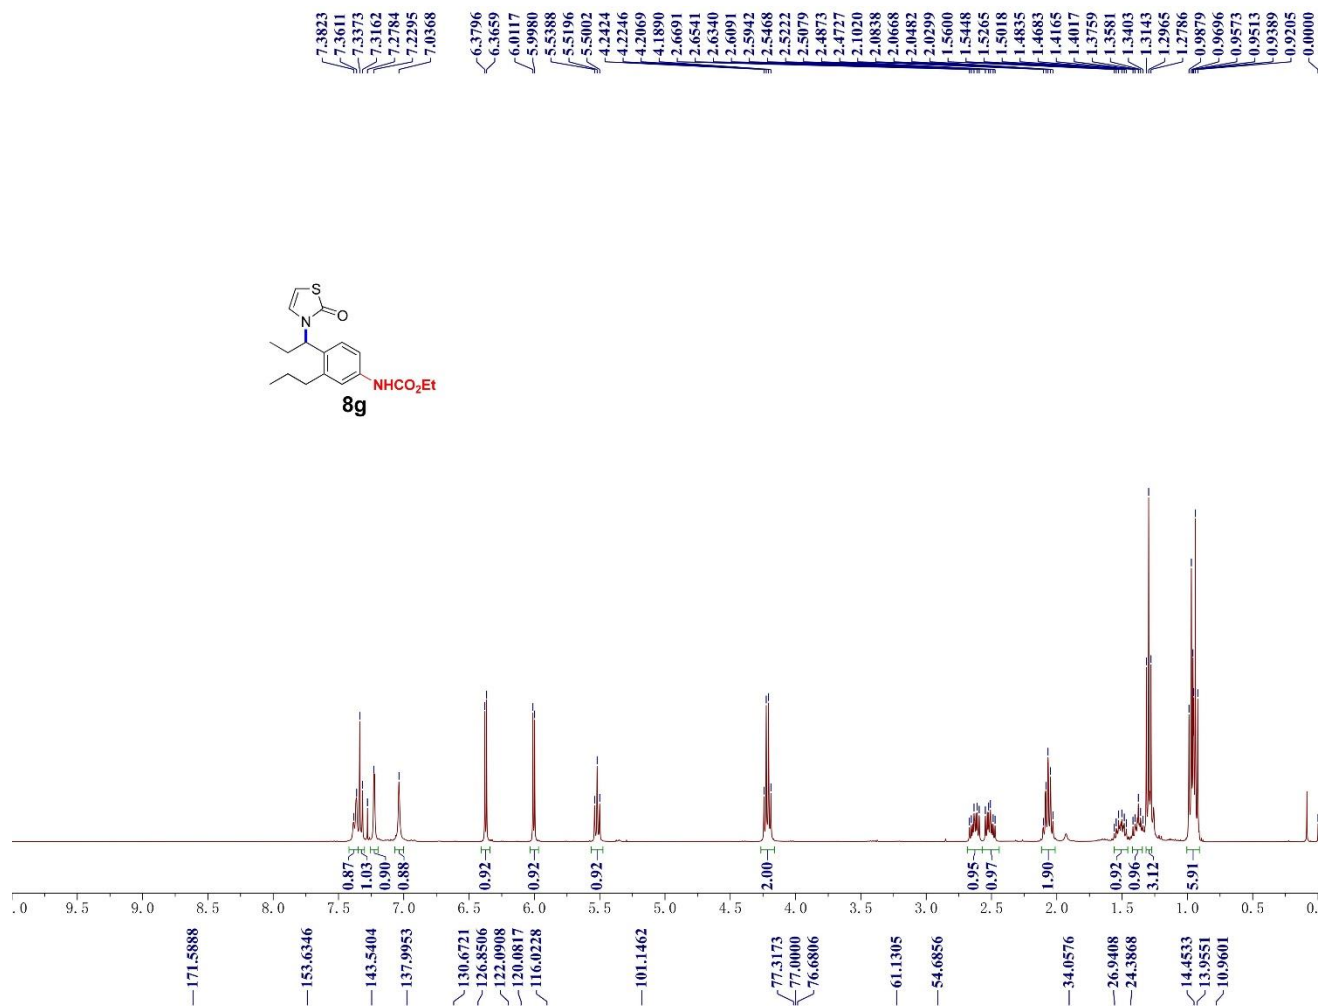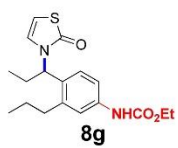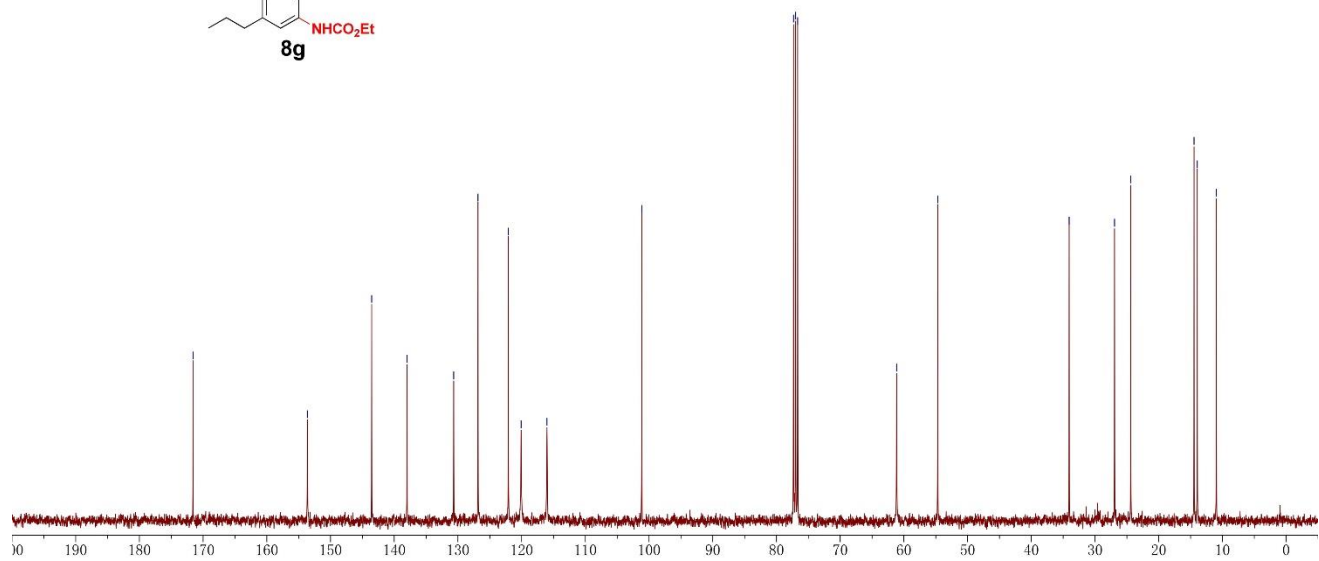

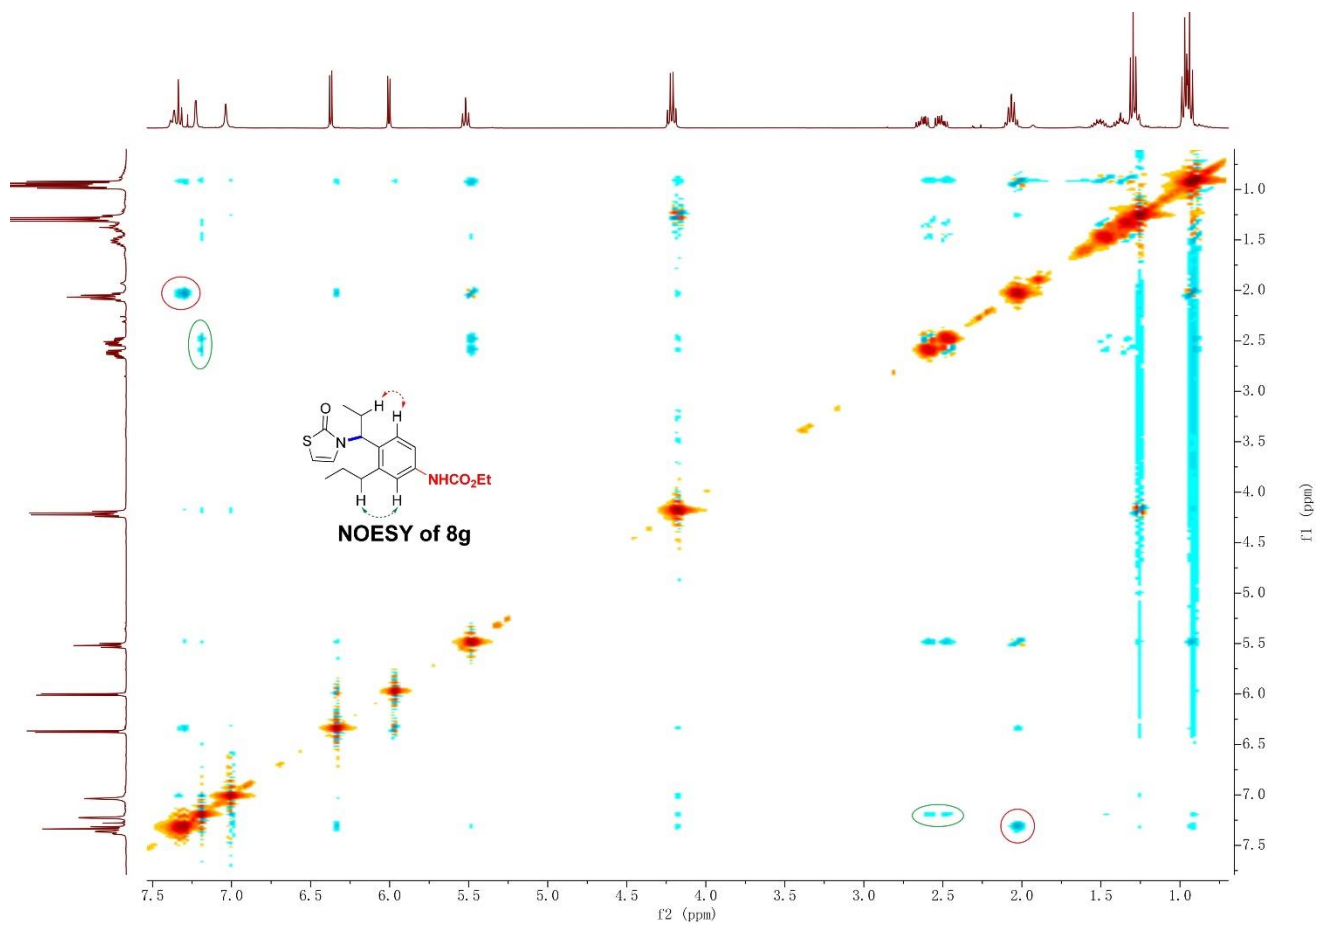

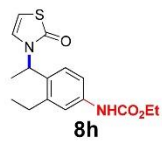

7.3946, 7.3744, 7.3668, 7.3461, 7.2767, 7.2418, 6.9962, 6.2935, 6.2798, 6.0103, 5.9965, 5.7566, 5.7393, 5.7219, 5.7046, 4.2496, 4.2318, 4.2140, 4.1962, 2.6715, 2.6526, 2.6340, 2.6156, 2.5968, 2.5779, 2.5543, 2.5157, 2.4970, 2.4786, 2.4600, 2.4413, 1.6696, 1.6520, 1.3215, 1.3037, 1.2859, 1.1050, 1.0862, 1.0674, -0.0000

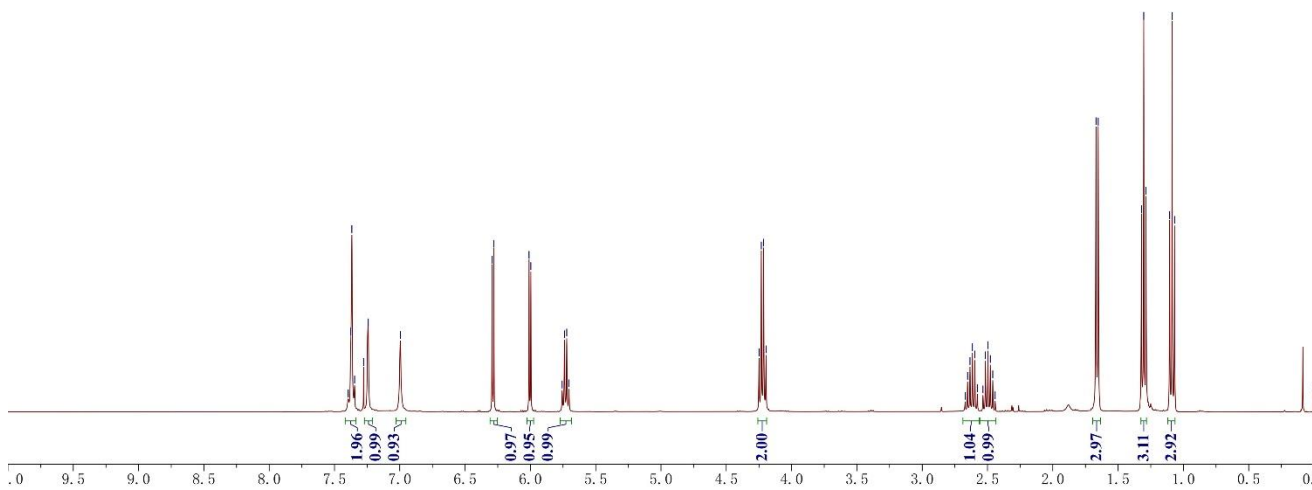

171.2051, 153.6160, 144.2771, 138.3540, 131.3963, 126.6315, 122.0990, 119.1532, 115.9957, 101.1956, 77.3185, 77.0000, 76.6827, 61.1798, 49.2104, 24.7230, 19.3736, 14.5928, 14.4674

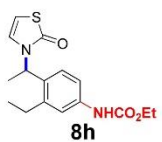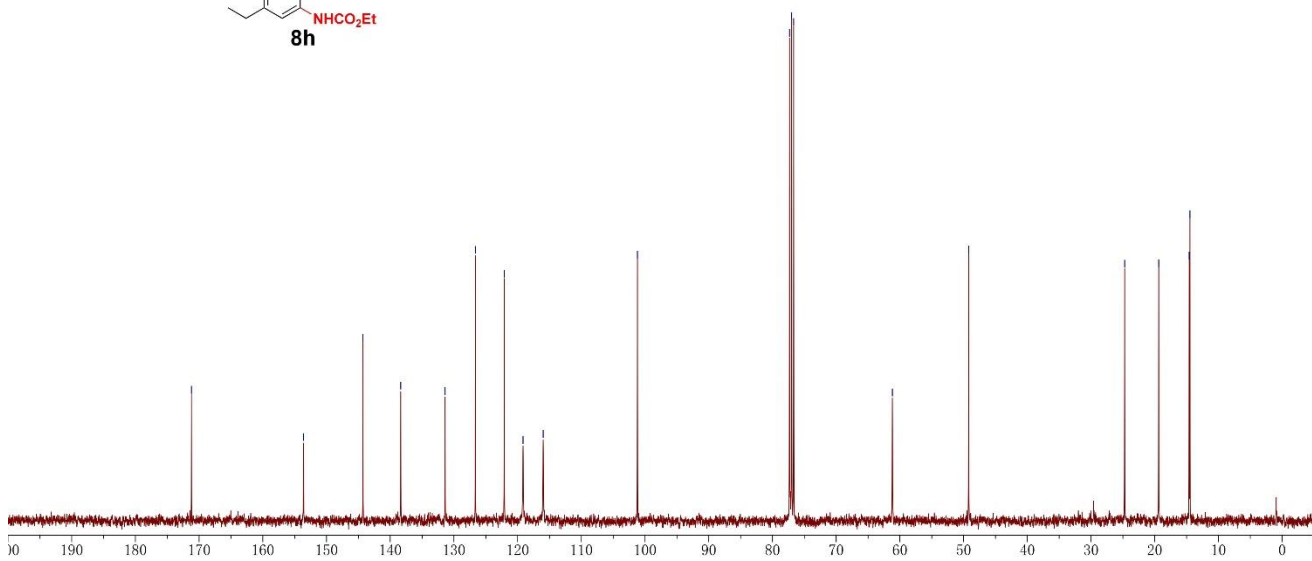

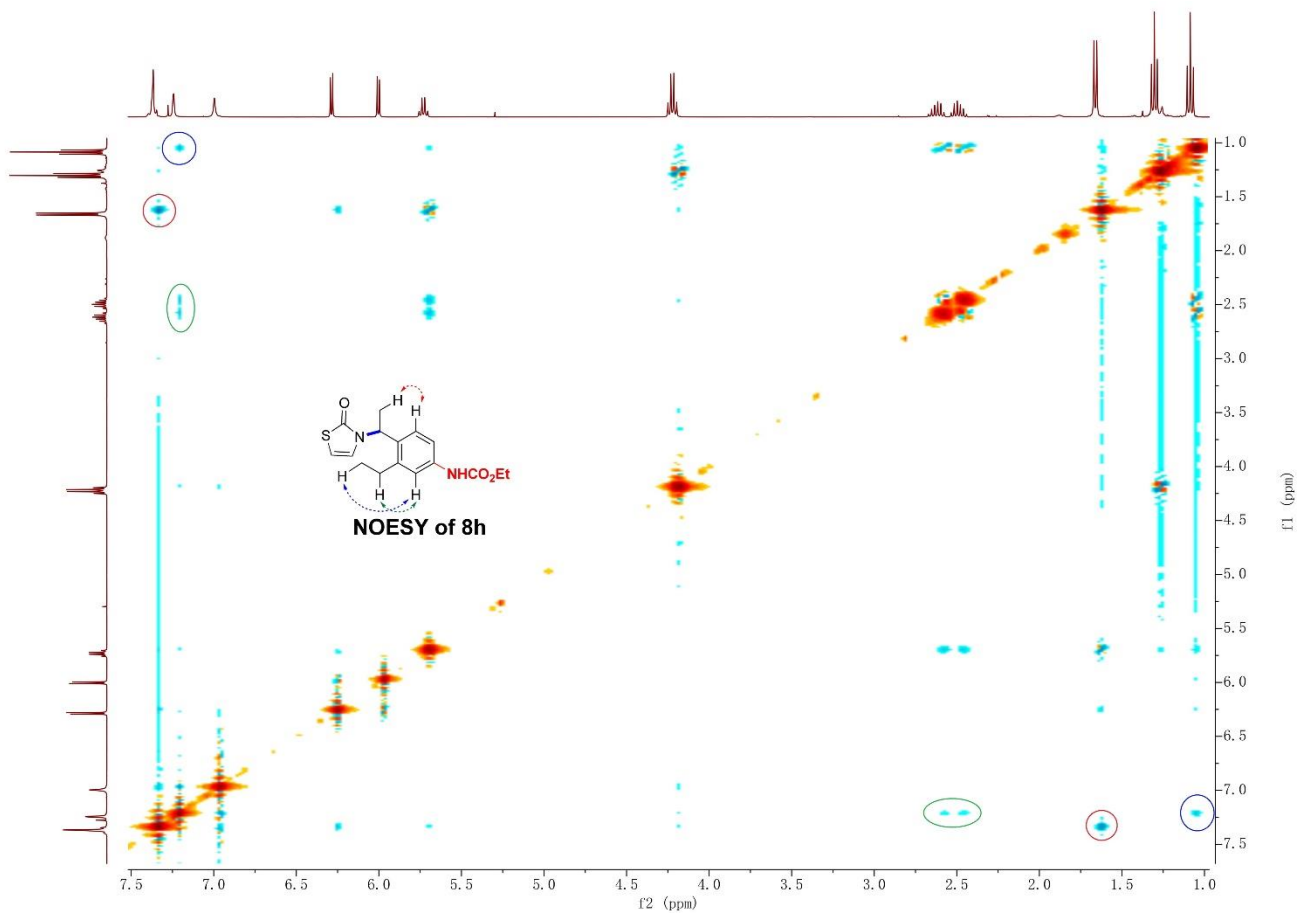

## 7.4 Spectra of Compounds in Scheme 1

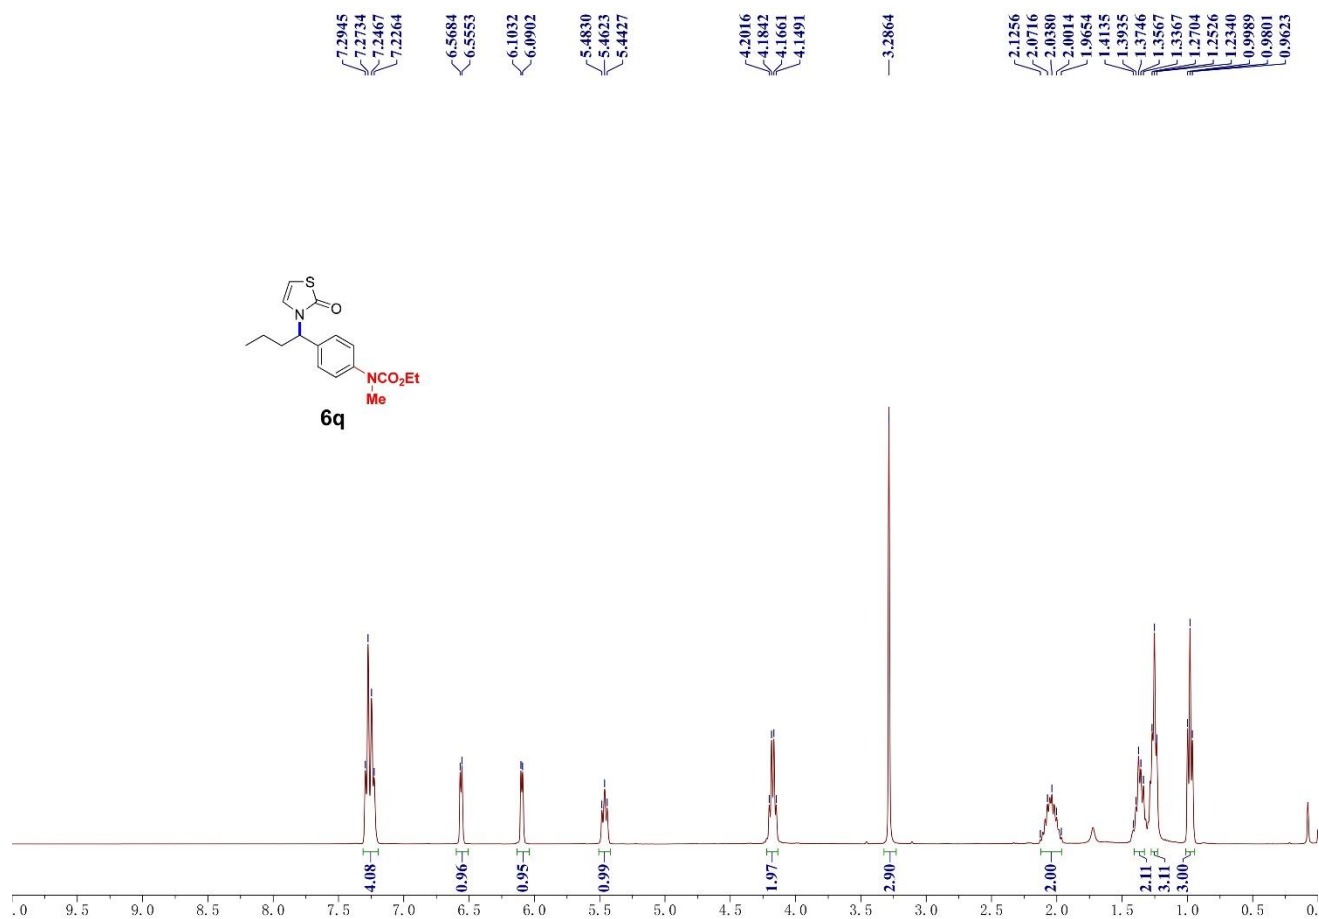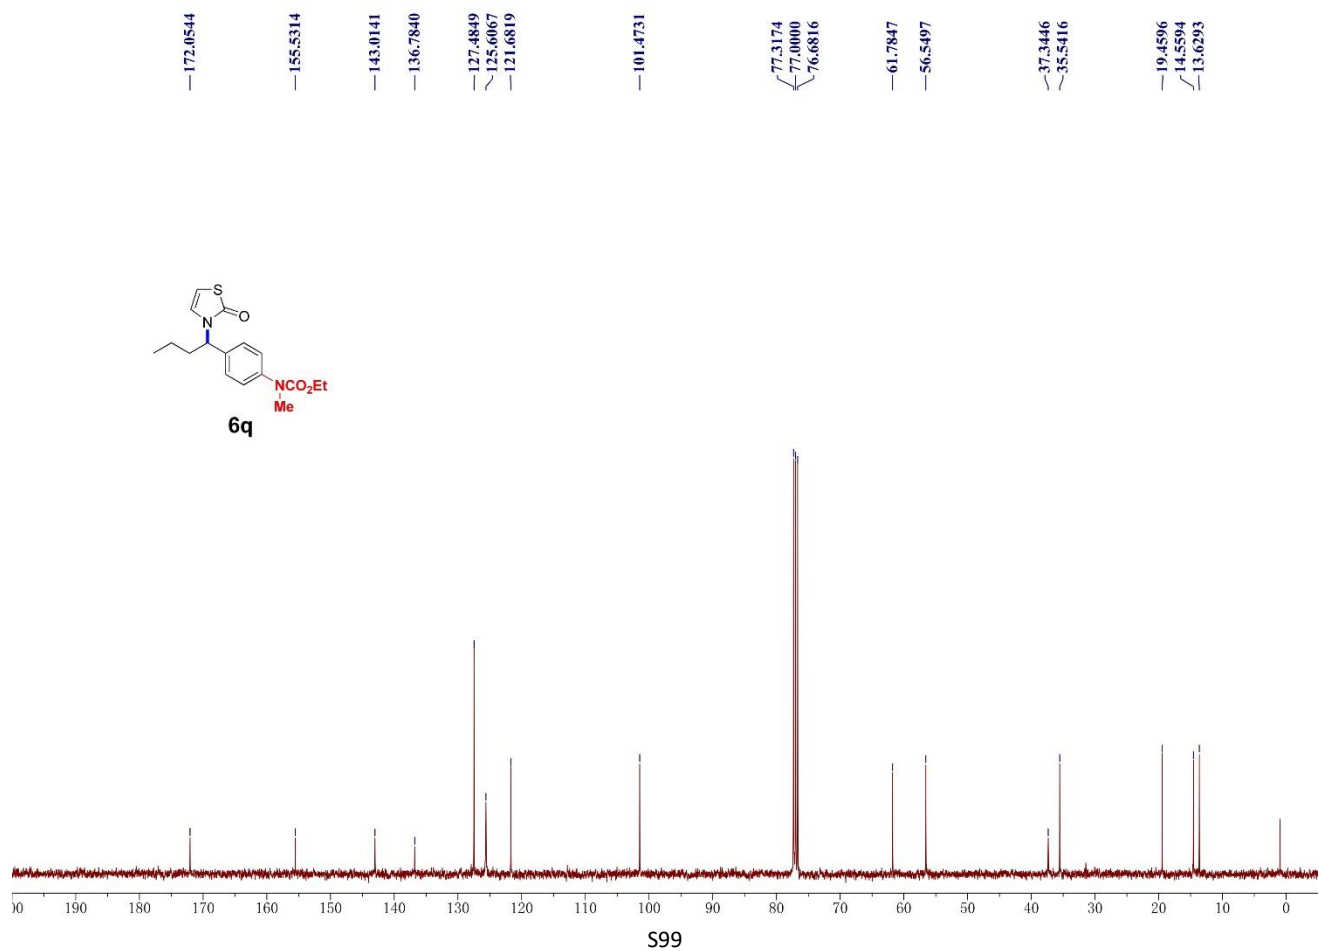

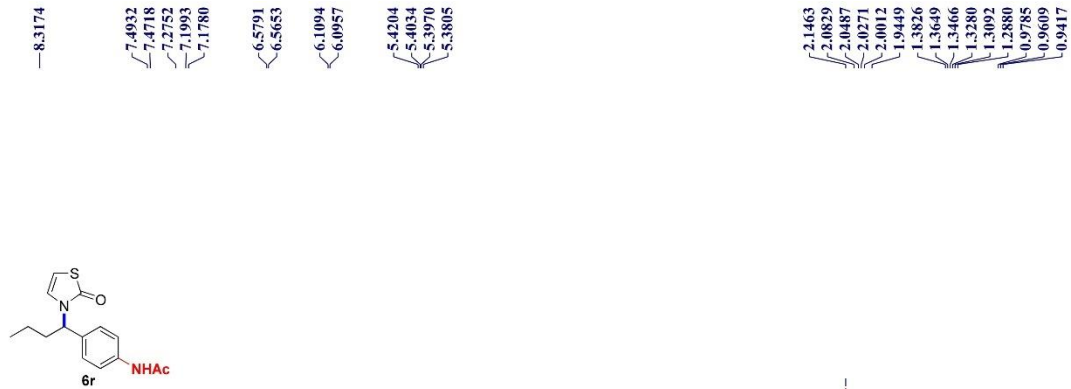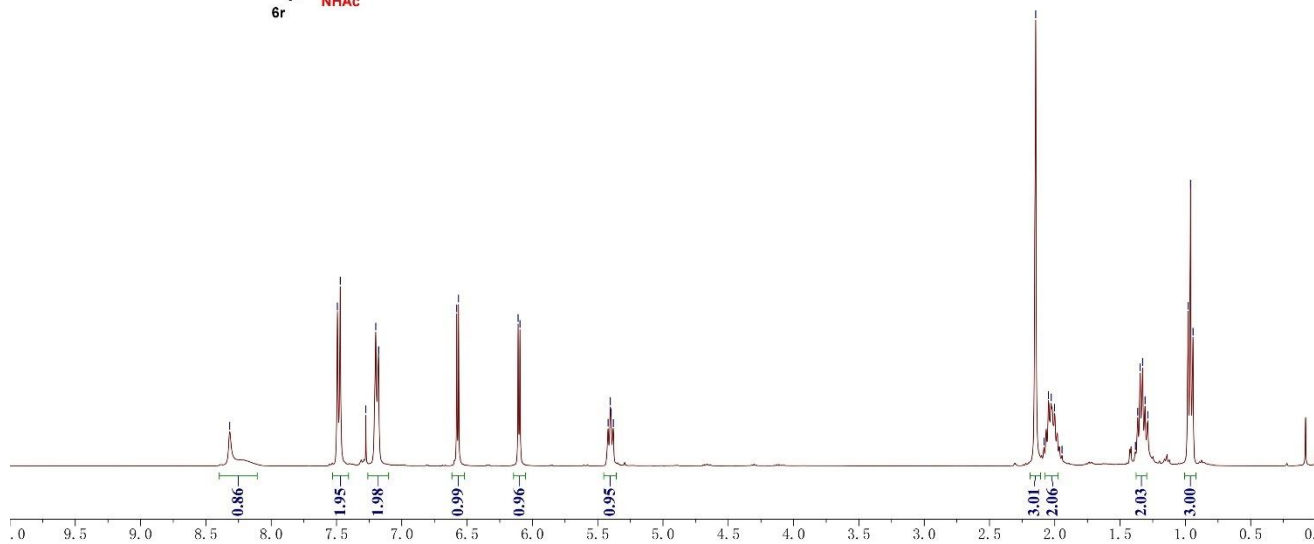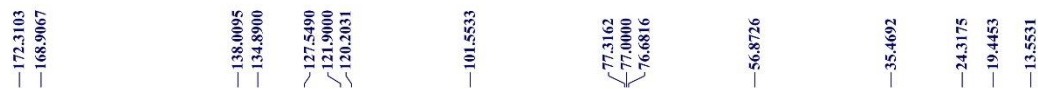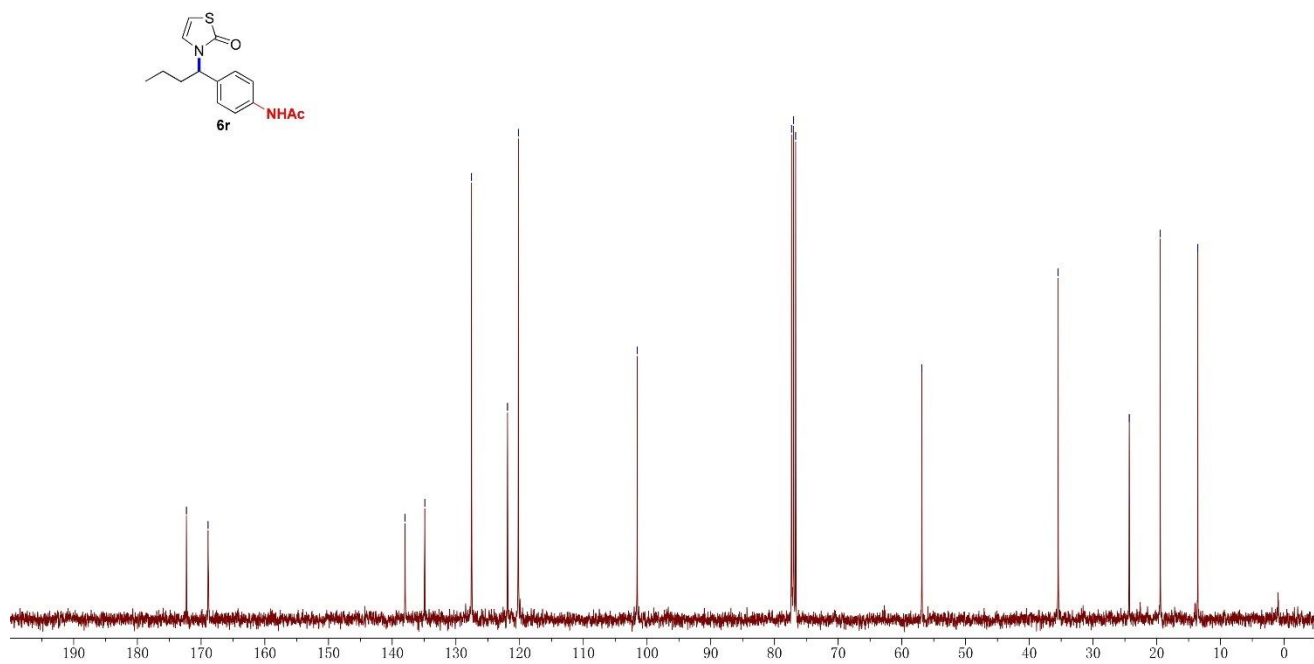



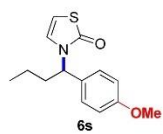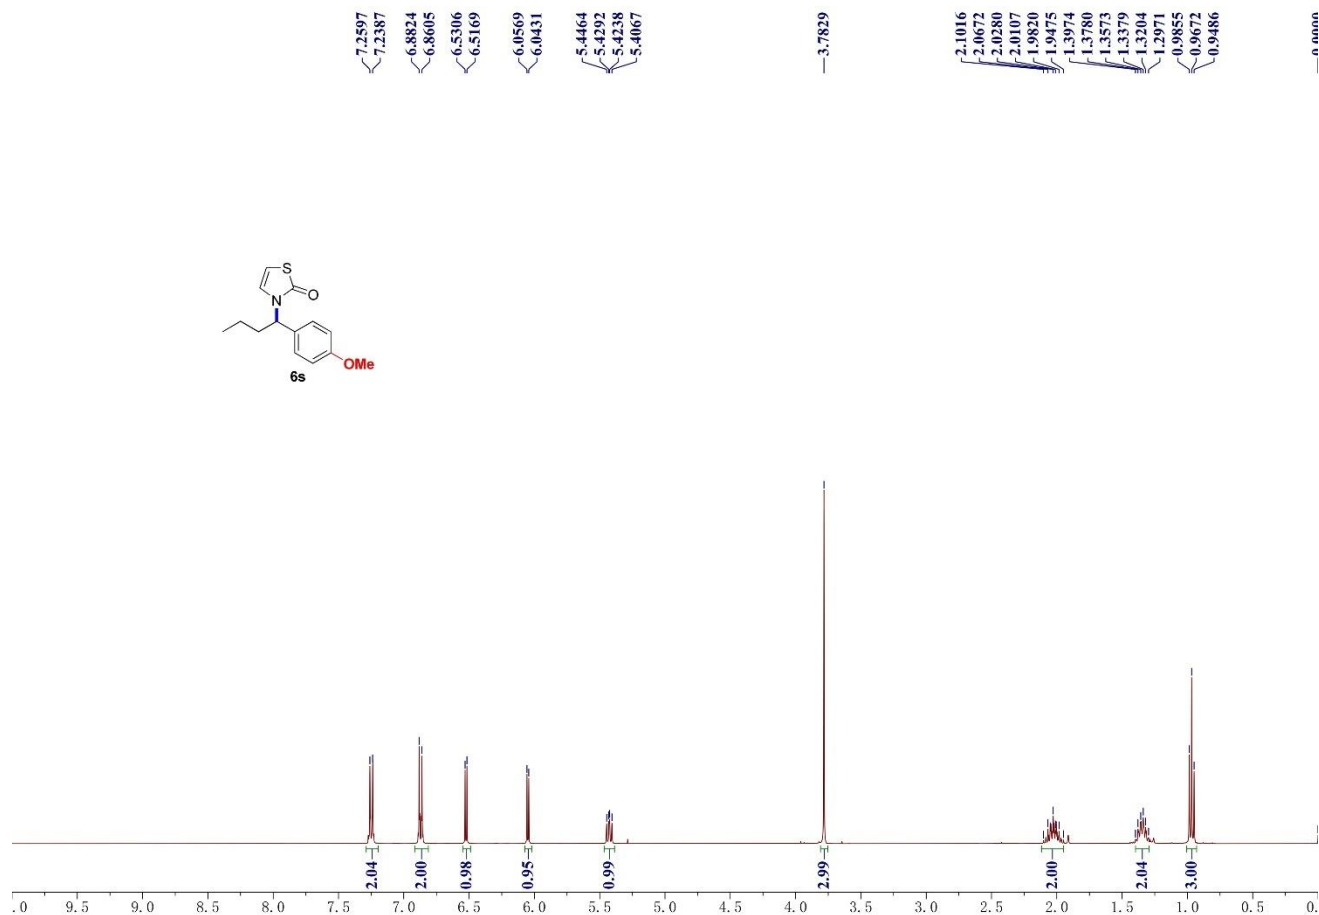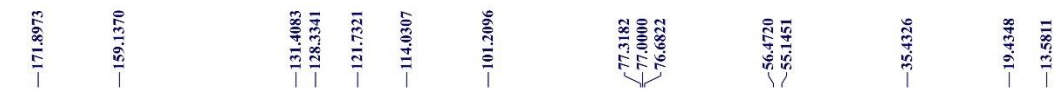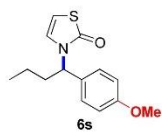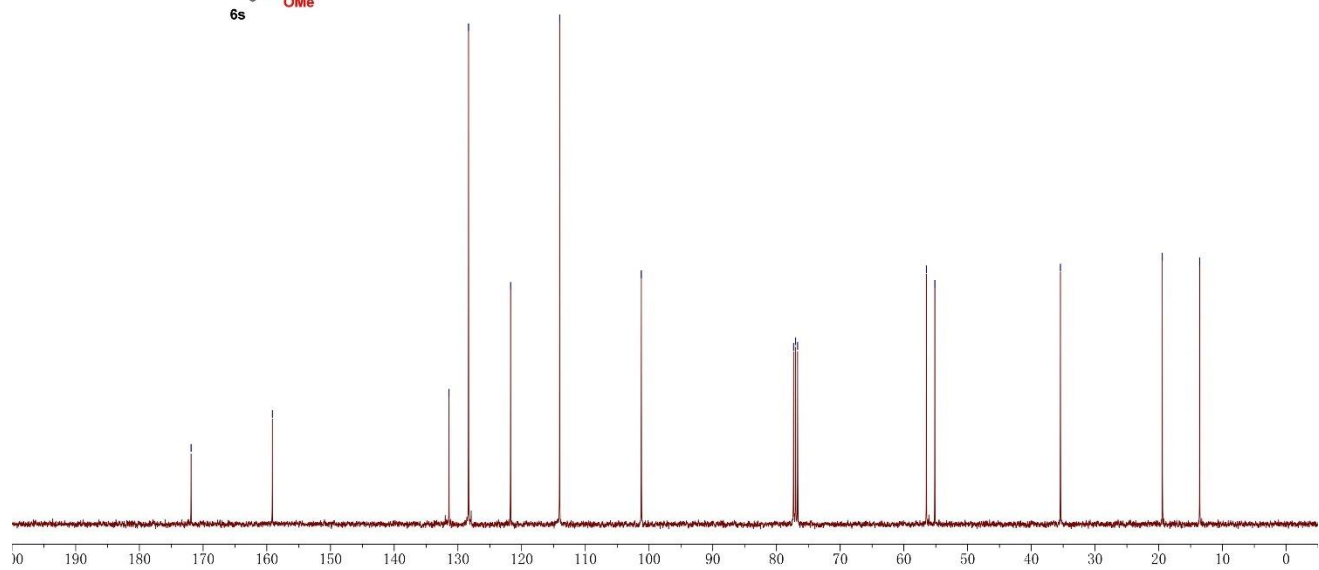

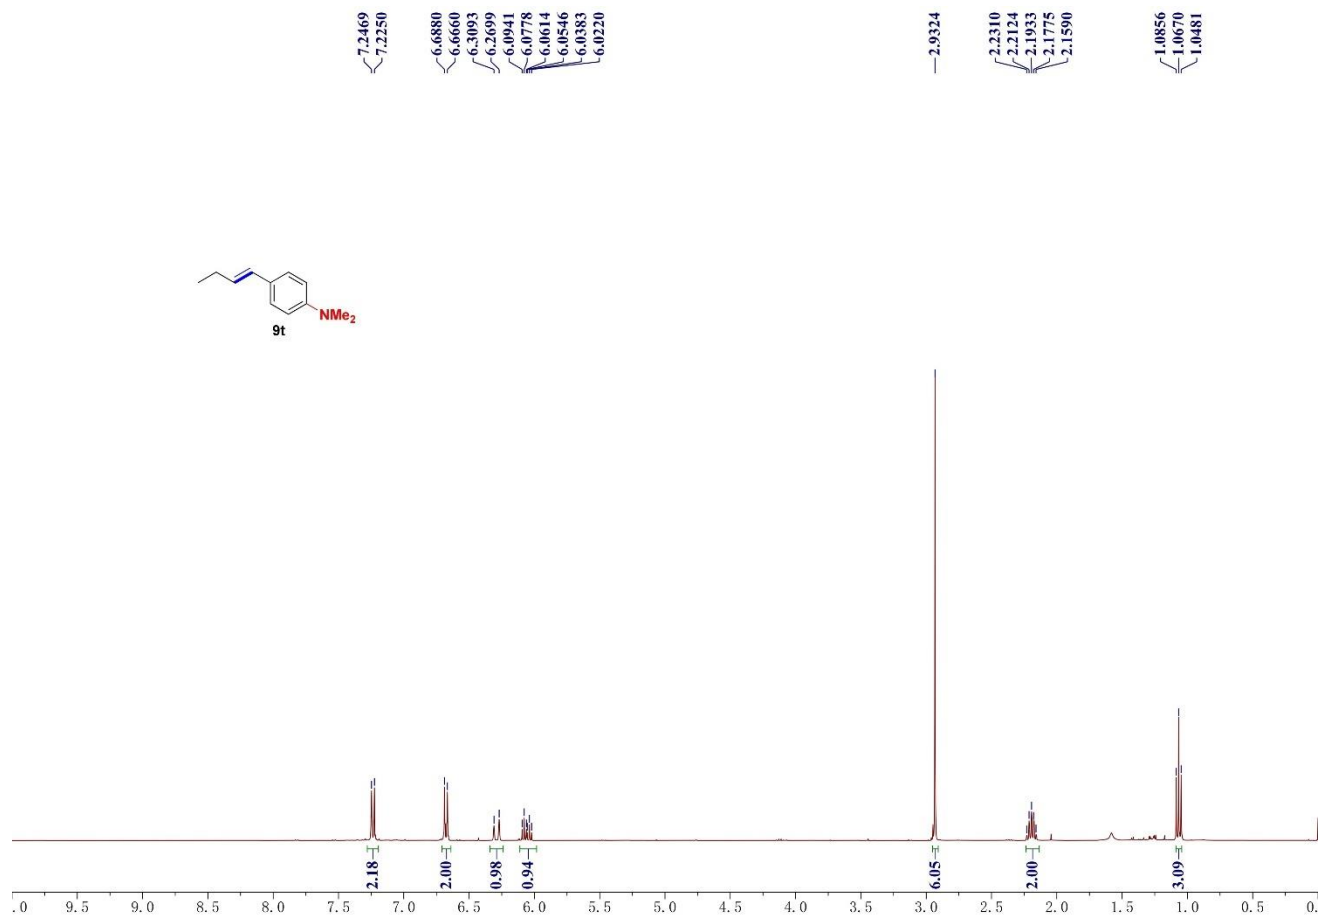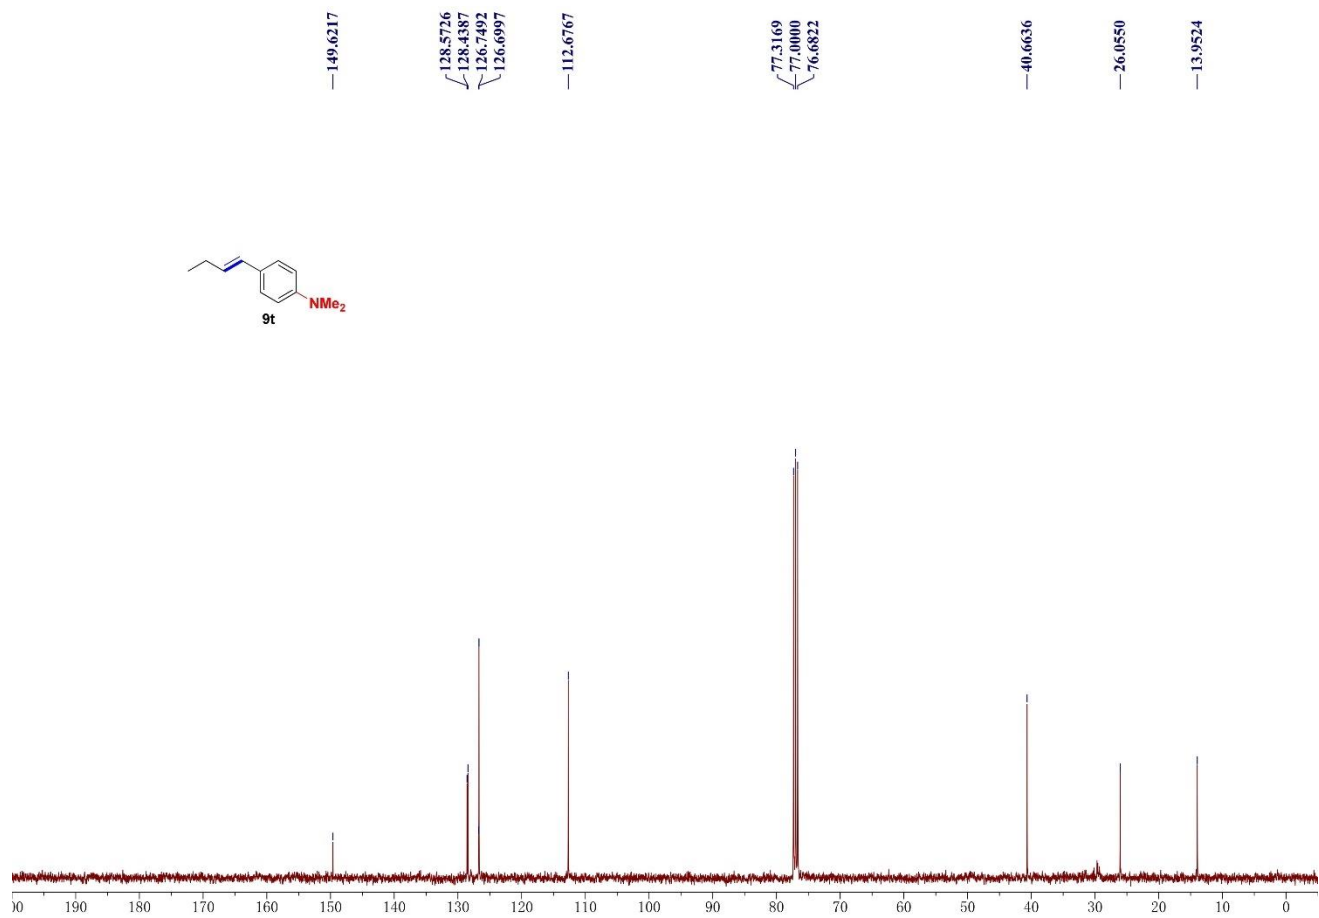

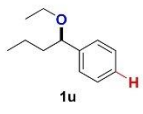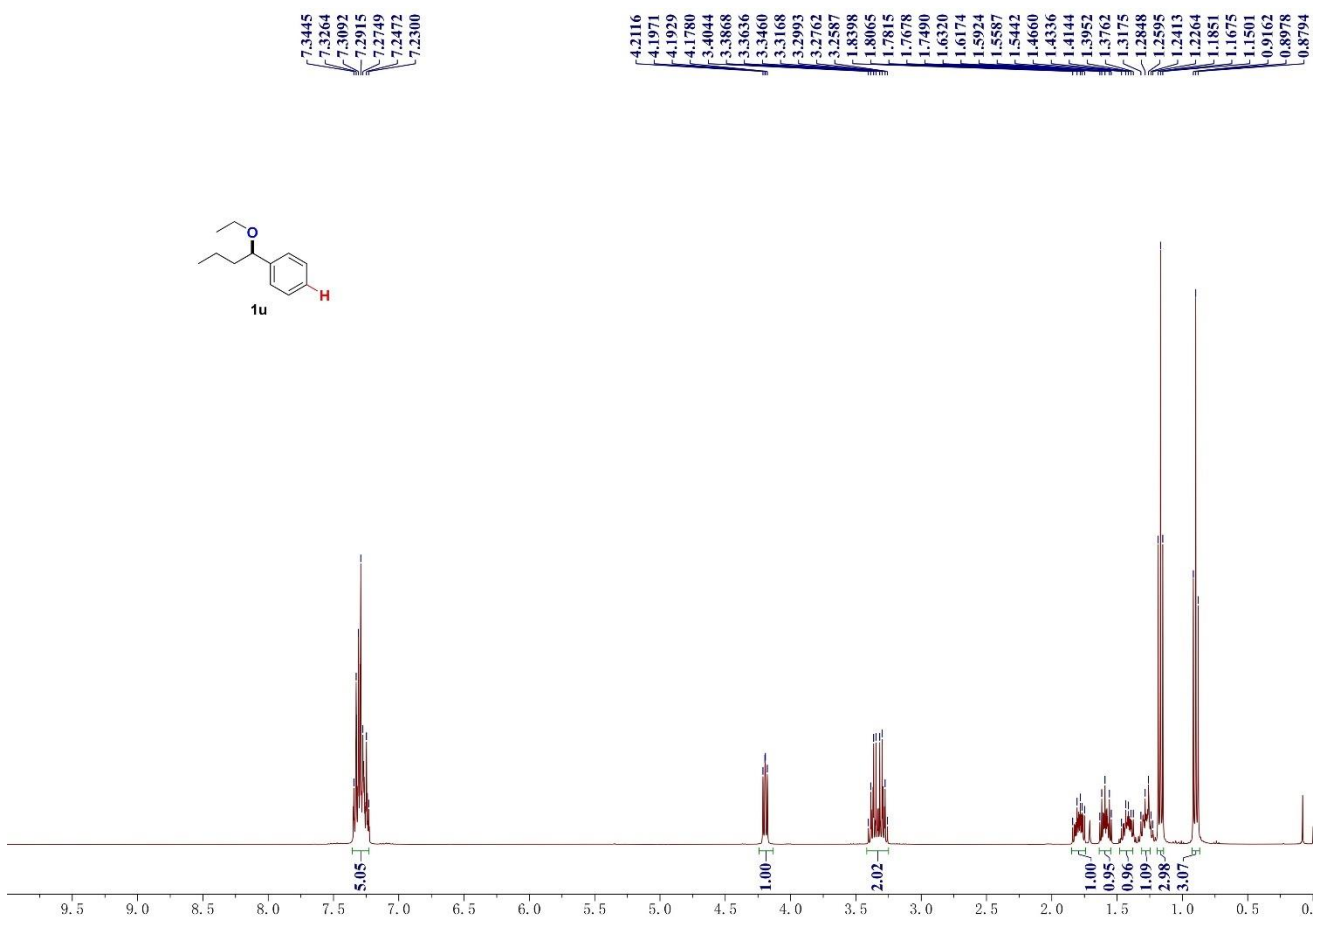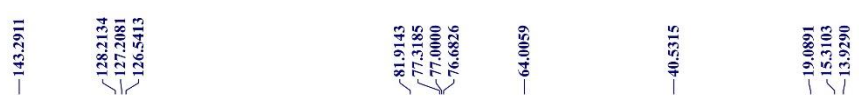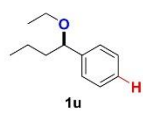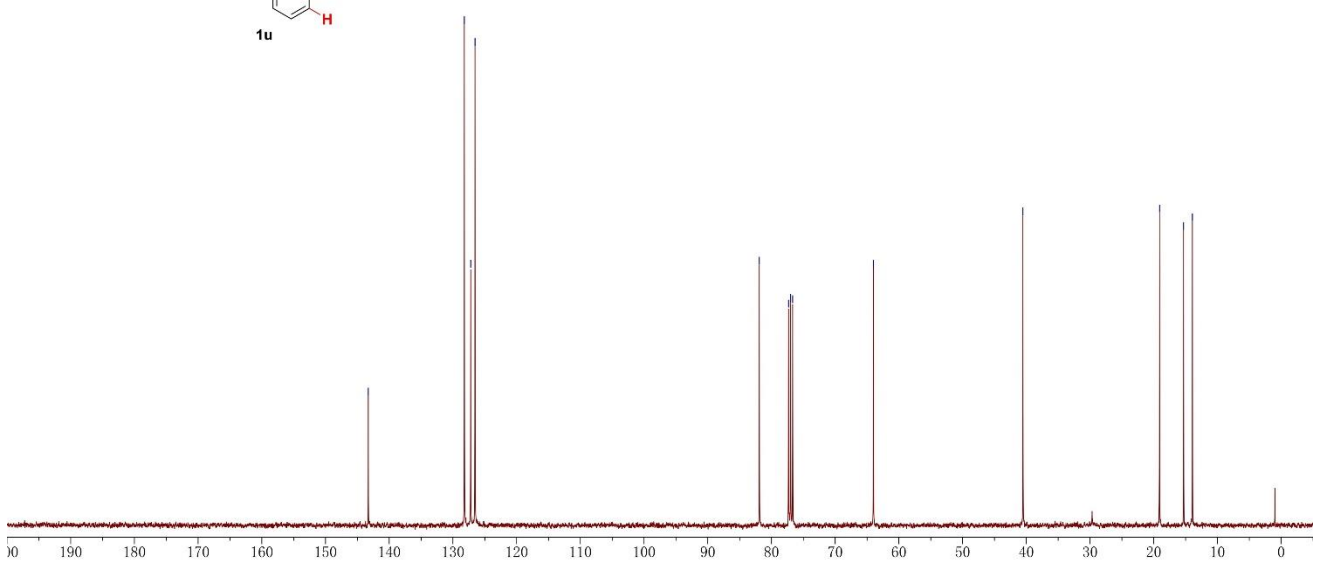

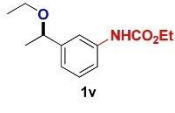

7.3662  
7.3457  
7.3347  
7.2928  
7.2735  
7.2543  
7.0279  
7.0093  
6.8918

4.4104  
4.3942  
4.3780  
4.3619  
4.2551  
4.2373  
4.2195  
4.2017

3.3877  
3.3701  
3.3522  
3.3345

1.4278  
1.4116  
1.3279  
1.3101  
1.2923  
1.1995  
1.1820  
1.1644

0.0000

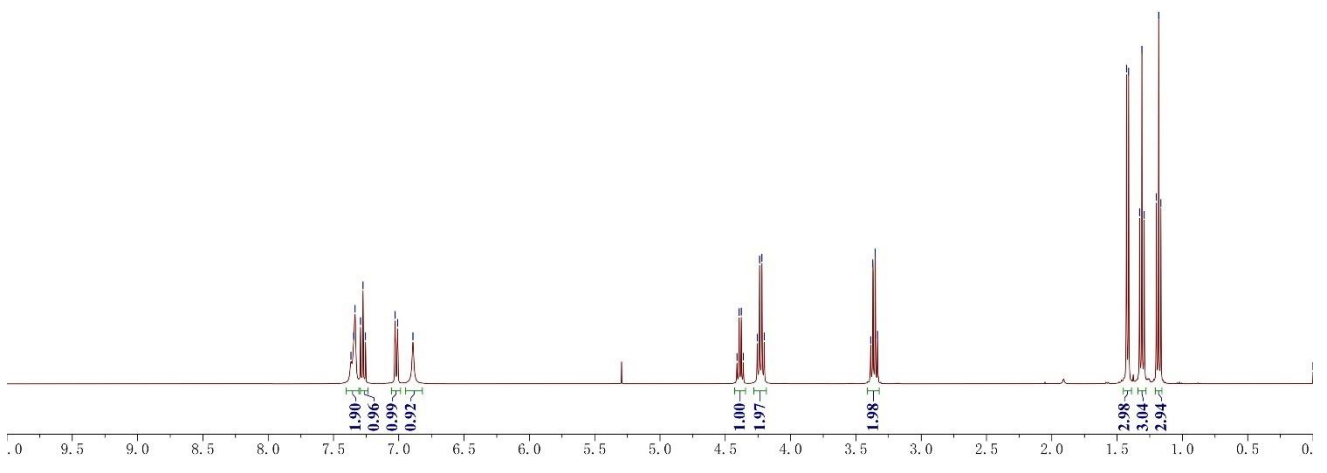

153.6319  
145.2577  
138.1070  
129.0566  
120.9053  
117.5033  
116.2000

77.5684  
77.3192  
77.0000  
76.6819

63.9054  
61.0944

24.1406  
15.2883  
14.4932

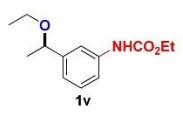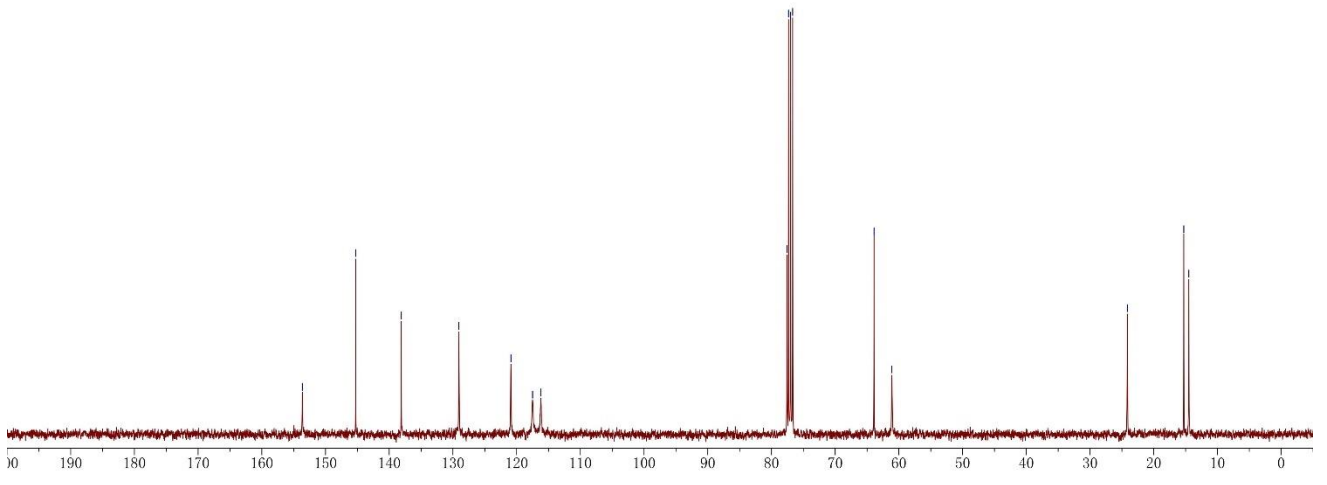

8.6197  
8.6194

8.1190  
8.0983

7.2866  
7.2658  
7.2477  
7.0422  
7.0234  
6.9885  
6.9702  
6.9516

4.5405  
4.5237  
4.5069  
4.4901  
4.2423  
4.2246  
4.2066  
4.1888

3.4497  
3.4322  
3.4146  
3.3968

1.5144  
1.4975  
1.3303  
1.3123  
1.2946  
1.2462  
1.2285  
1.2110

0.0000

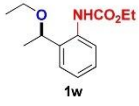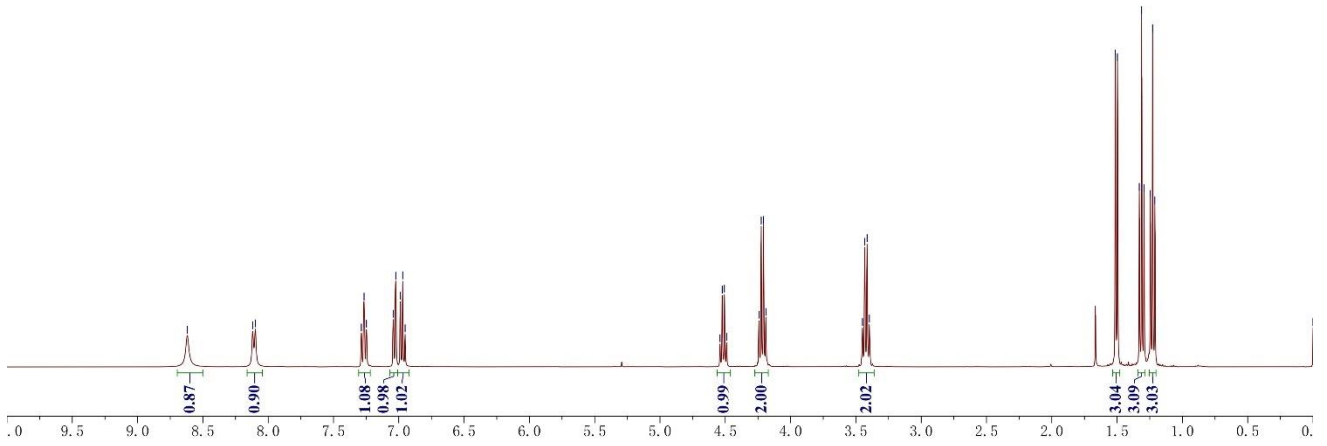

153.8225

136.8859

129.2883

128.3977

128.1550

122.5508

119.9233

79.5544

77.3187

77.0000

76.6827

64.1999

60.8744

21.3869

15.2127

14.5745

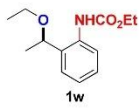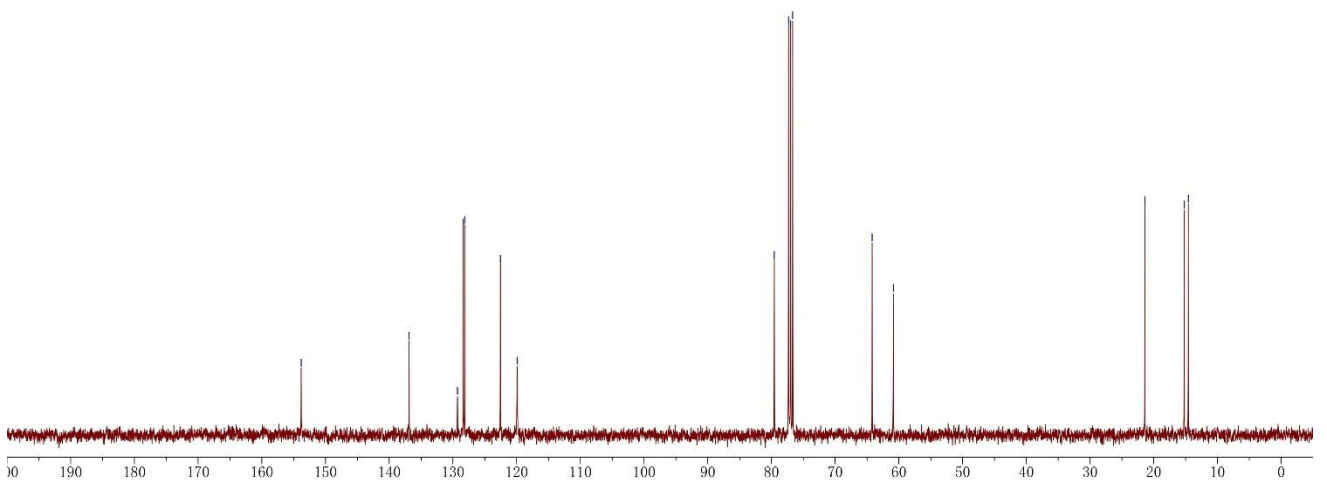

## 7.5 Spectra of Compounds in Scheme 2

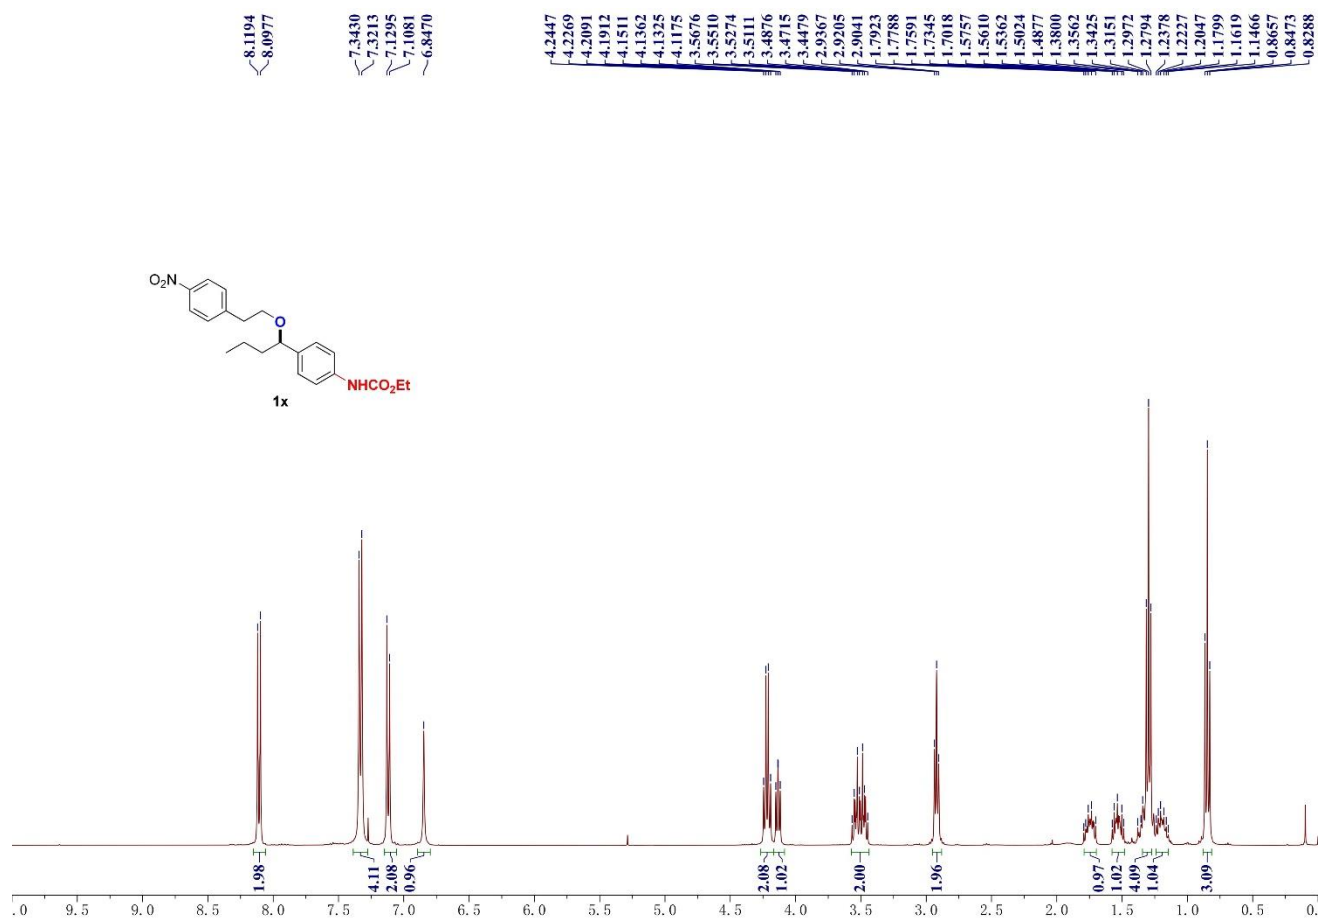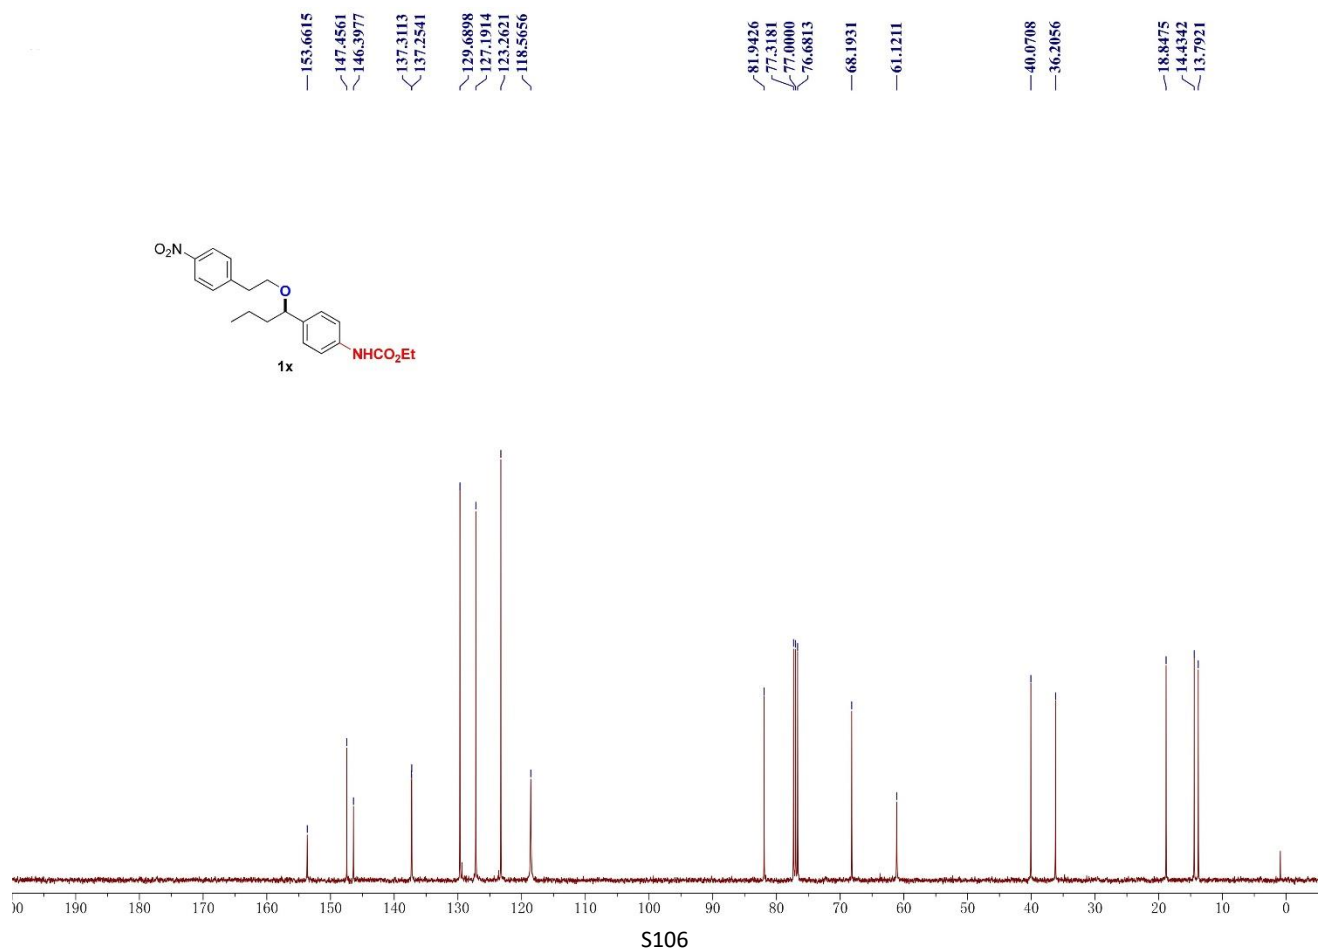

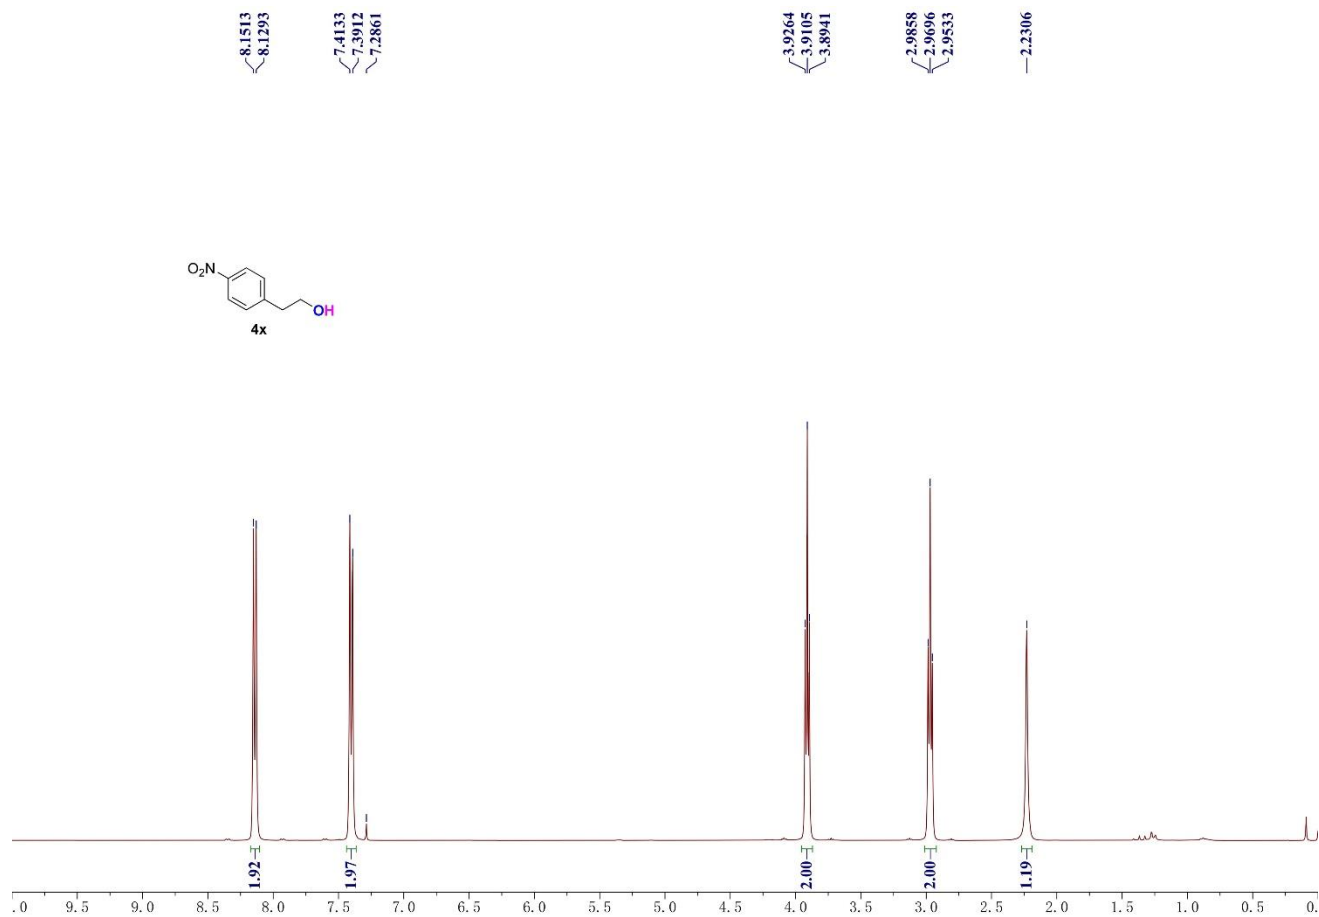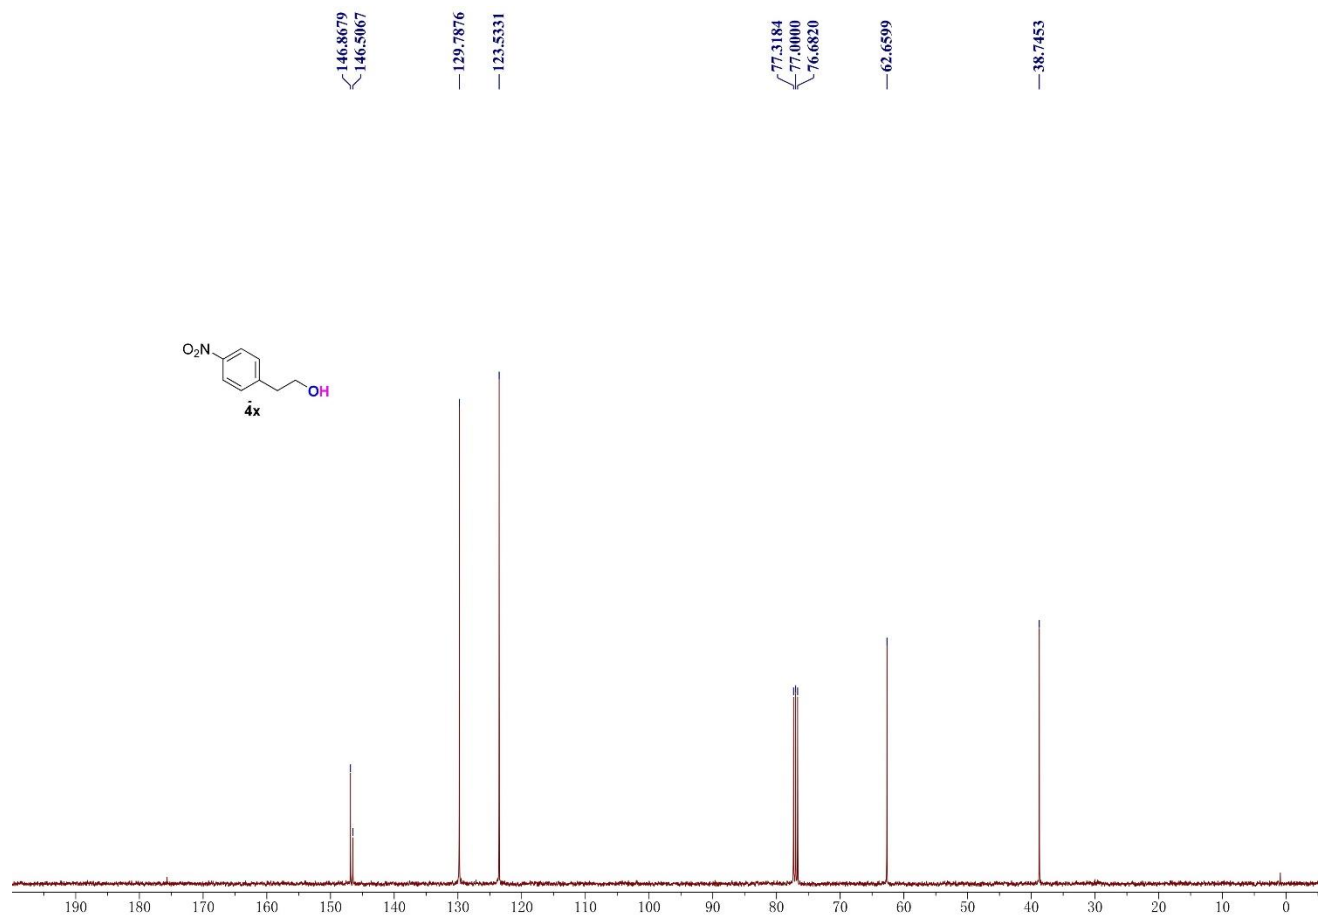

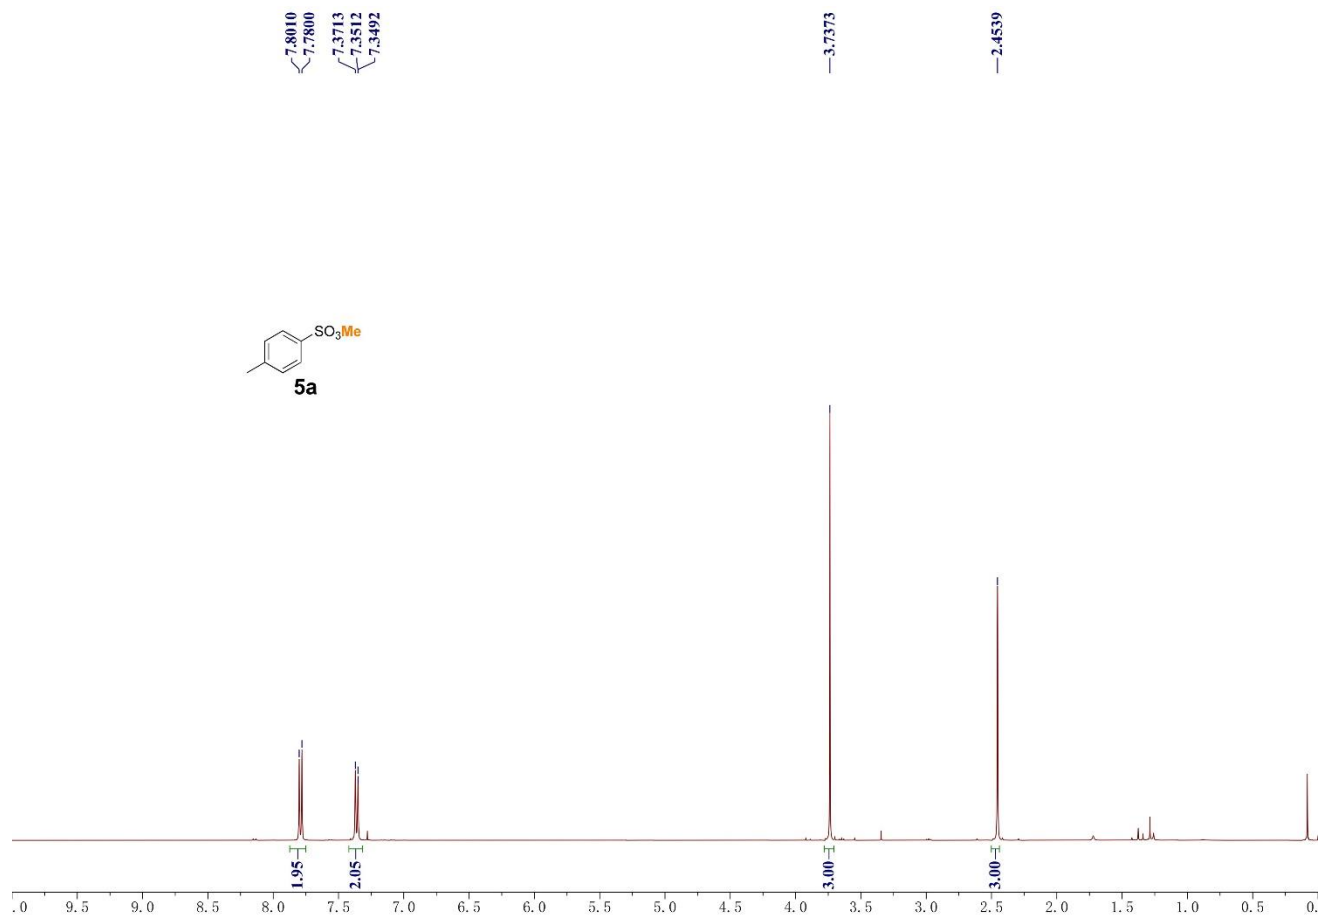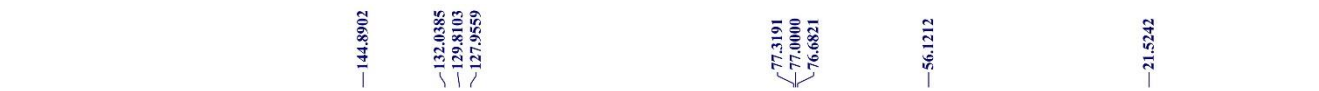



7.3166  
7.2950  
7.2758  
7.2540  
7.2497  
6.7233  
6.3375  
6.3338  
6.3301  
6.2981  
6.2943  
6.2906  
6.2097  
6.1936  
6.1776  
6.1700  
6.1542  
6.1380  
4.2375  
4.2198  
4.2018  
4.1840  
2.2444  
2.2408  
2.2257  
2.2221  
2.2098  
2.2067  
2.2034  
2.1911  
2.1876  
2.1726  
2.1688  
1.3110  
1.2932  
1.2754  
1.0935  
1.0748  
1.0560

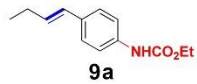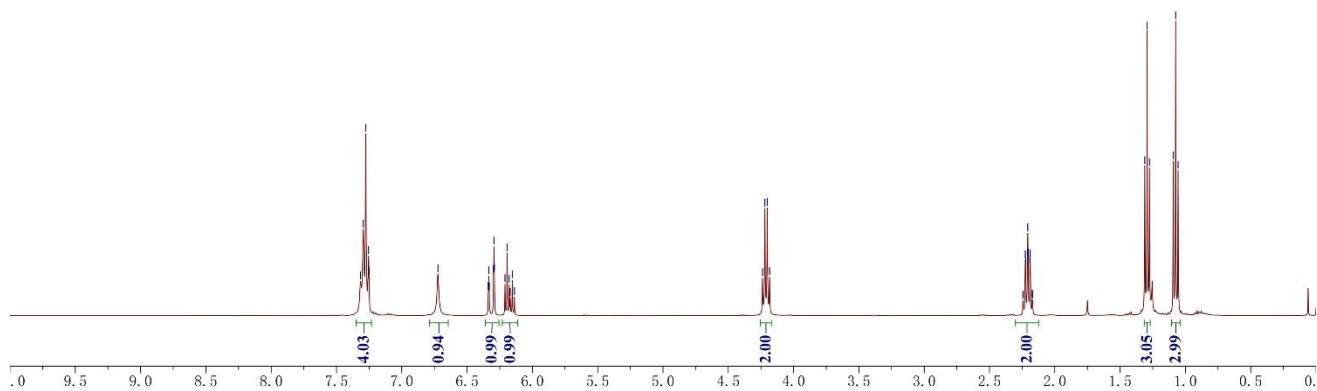

153.5850  
136.5534  
133.1900  
131.4839  
128.0138  
126.4225  
118.6475  
77.3174  
77.0000  
76.6812  
61.1244  
25.9670  
14.4897  
13.6270

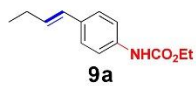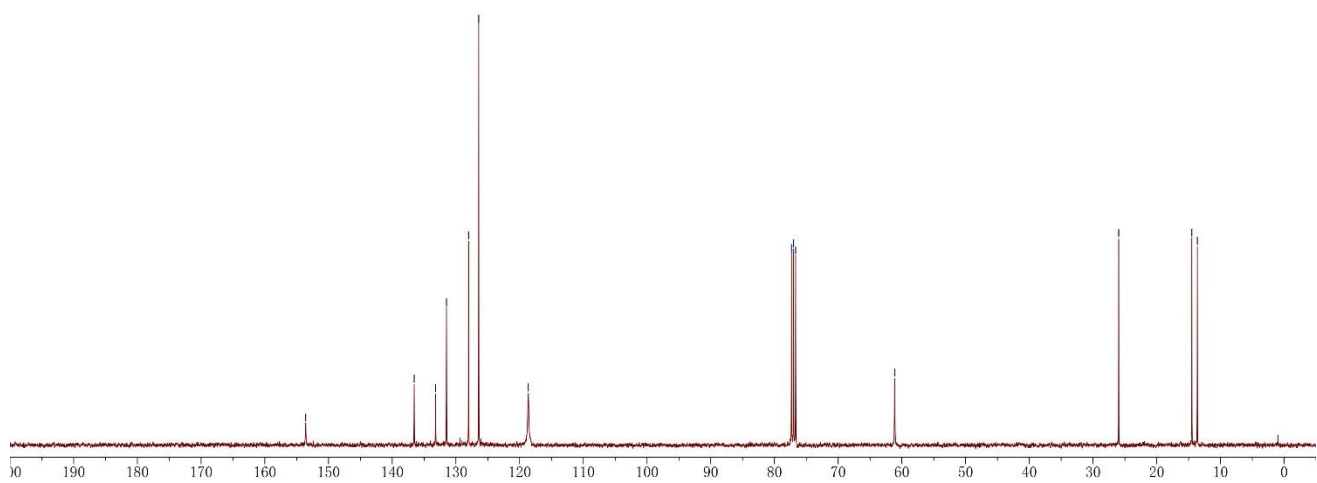

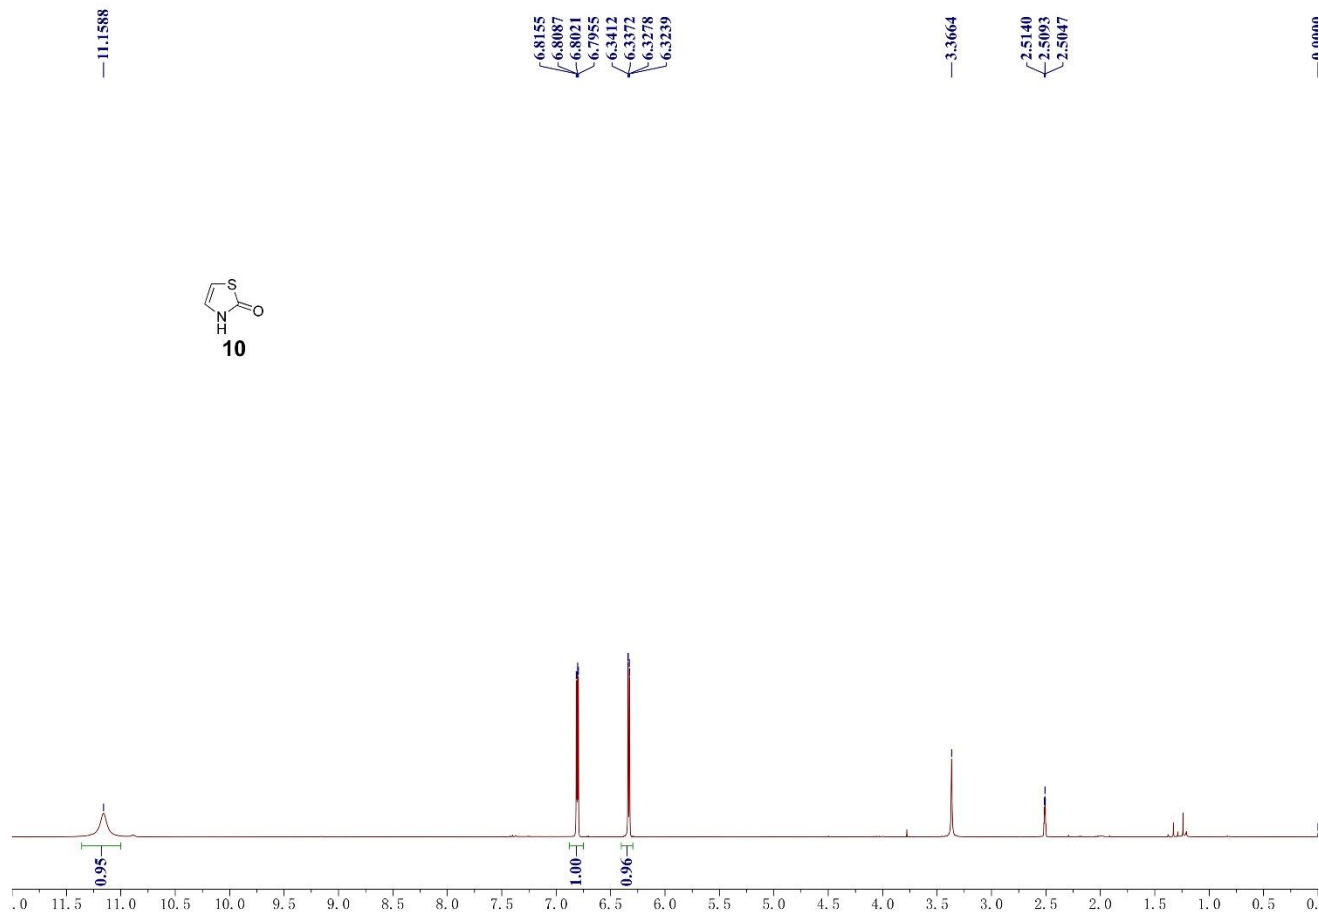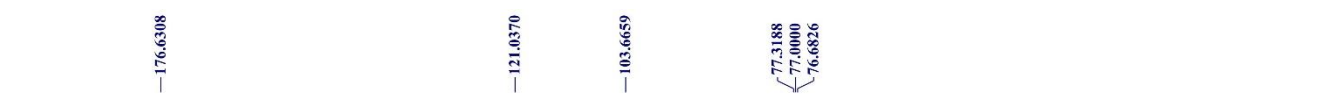

Supplement: d4qo00740a1.pdf [file d4qo00740a1.pdf]
